# Supplementary material for: A phosphatase-like nanomaterial promotes autophagy and reprograms macrophages for cancer immunotherapy
Source: Chem Sci. 2024 Jun 17;15(28):10838–50. doi: 10.1039/d4sc01690d (PMC11253186; doi:10.1039/d4sc01690d)
Supplement: SC-015-D4SC01690D-s003 [file SC-015-D4SC01690D-s003.xlsx]

## Sheet: Table S1
Sites	Protein	Gene ID	Gene Symbol	Original intensity CTR1	Original intensity CTR2	Original intensity CTR3	Original intensity LNO1	Original intensity LNO2	Original intensity LNO3	FC(lno_vs_ctr)	pValue(lno_vs_ctr)	FDR(lno_vs_ctr)	Sig(lno_vs_ctr)
S206	Z4YLK3_MOUSE	217335	Fbf1	0	0	0	939780	1.28602e+06	2.19425e+06	-	-	-	not significant
S497	Z4YKC4_MOUSE	230861	Eif4g3	0	0	0	3.19996e+06	2.95463e+06	3.5416e+06	-	-	-	not significant
S277	Z4YKC4_MOUSE	230861	Eif4g3	0	0	0	2.51461e+06	2.4187e+06	2.05415e+06	-	-	-	not significant
S8	Z4YJL0_MOUSE	228536	Bahd1	0	0	0	1004440	953193	1.12274e+06	-	-	-	not significant
S166	V9GWW1_MOUSE	235469	Zfp280d	0	0	0	2.10825e+06	2.22932e+06	2.24147e+06	-	-	-	not significant
S362	U5KVR9_MOUSE	28135	Cep63	0	0	0	2532235	4.42338e+06	3.10393e+06	-	-	-	not significant
S17	S4R2L4_MOUSE	208606	Rsrc2	0	0	0	10257574	1.19722e+07	1.12471e+07	-	-	-	not significant
S212	S4R1B3_MOUSE	64704	Htra2	0	0	0	1.03008e+06	1.11612e+06	872034	-	-	-	not significant
S104	HNRPF_MOUSE	98758	Hnrnpf	0	0	0	5912958	6.01449e+06	6.3749e+06	-	-	-	not significant
S1848	ZN292_MOUSE	30046	Zfp292	0	0	0	5.79248e+06	5.47614e+06	5.2149e+06	-	-	-	not significant
S51	KNOP1_MOUSE	66356	Knop1	0	0	0	1180733	1.63209e+06	1.17136e+06	-	-	-	not significant
S233	ACL6A_MOUSE	56456	Actl6a	0	0	0	4521649	3.61133e+06	3.22127e+06	-	-	-	not significant
S39	BCL3_MOUSE	12051	Bcl3	0	0	0	9.59258e+06	3.8232e+06	3.22563e+06	-	-	-	not significant
S385	MECP2_MOUSE	17257	Mecp2	0	0	0	1.9883e+06	1.83081e+06	2.05128e+06	-	-	-	not significant
S706	BAZ1B_MOUSE	22385	Baz1b	0	0	0	3.16295e+06	3.62864e+06	3.55991e+06	-	-	-	not significant
S709	BAZ1B_MOUSE	22385	Baz1b	0	0	0	3.16295e+06	3.62864e+06	3.55991e+06	-	-	-	not significant
S241	HNRPC_MOUSE	15381	Hnrnpc	0	0	0	5.79702e+06	8.09897e+06	9.02504e+06	-	-	-	not significant
S249	HNRPC_MOUSE	15381	Hnrnpc	0	0	0	5.78791e+06	7.77501e+06	8.03132e+06	-	-	-	not significant
S306	HNRPC_MOUSE	15381	Hnrnpc	0	0	0	251332624	2.02627e+08	195267268	-	-	-	not significant
S211	CLIC1_MOUSE	114584	Clic1	0	0	0	1.80408e+06	902893	1.19384e+06	-	-	-	not significant
S156	CLIC1_MOUSE	114584	Clic1	0	0	0	1.51904e+06	1.20374e+06	1.68285e+06	-	-	-	not significant
S423	KS6B2_MOUSE	58988	Rps6kb2	0	0	0	2.27741e+06	1.73852e+06	1.61173e+06	-	-	-	not significant
S336	CX3C1_MOUSE	13051	Cx3cr1	0	0	0	4336356	4.41089e+06	4.10575e+06	-	-	-	not significant
S229	NFAT5_MOUSE	54446	Nfat5	0	0	0	1.64732e+06	835988	1.66594e+06	-	-	-	not significant
S264	G6PT3_MOUSE	56857	Slc37a2	0	0	0	931046	779952	893698	-	-	-	not significant
T131	SKP1_MOUSE	21402	Skp1	0	0	0	4.20501e+06	2.11215e+06	5.57508e+06	-	-	-	not significant
S848	PHF2_MOUSE	18676	Phf2	0	0	0	2.37419e+06	4.22644e+06	4.66837e+06	-	-	-	not significant
S113	TFEB_MOUSE	21425	Tfeb	0	0	0	2.22459e+06	1.50769e+06	2.02195e+06	-	-	-	not significant
S121	TFEB_MOUSE	21425	Tfeb	0	0	0	2.22459e+06	1.50769e+06	2.02195e+06	-	-	-	not significant
S509	MRP5_MOUSE	27416	Abcc5	0	0	0	1.12094e+06	1.41484e+06	1.63949e+06	-	-	-	not significant
S189	SAE1_MOUSE	56459	Sae1	0	0	0	2.40961e+06	1.82485e+06	2.0879e+06	-	-	-	not significant
T106	AAKB1_MOUSE	19079	Prkab1	0	0	0	2.6841e+06	3.12115e+06	2.43956e+06	-	-	-	not significant
T229	FHL3_MOUSE	14201	Fhl3	0	0	0	1.72733e+06	1.62367e+06	1.50268e+06	-	-	-	not significant
S244	NUMB_MOUSE	18222	Numb	0	0	0	3.27574e+06	3.91043e+06	2.94524e+06	-	-	-	not significant
S636	NUMB_MOUSE	18222	Numb	0	0	0	2.56208e+06	2.57778e+06	2.76803e+06	-	-	-	not significant
S375	DOK3_MOUSE	27261	Dok3	0	0	0	3.74458e+06	4.39933e+06	3.60032e+06	-	-	-	not significant
T165	TSNAX_MOUSE	53424	Tsnax	0	0	0	1.96988e+06	2.87664e+06	3.28758e+06	-	-	-	not significant
S673	ADDG_MOUSE	27360	Add3	0	0	0	2.09742e+06	5.84303e+06	2.38309e+06	-	-	-	not significant
S64	ADDG_MOUSE	27360	Add3	0	0	0	1.42358e+06	729219	985449	-	-	-	not significant
S1264	MYO9B_MOUSE	17925	Myo9b	0	0	0	19808988	1.43197e+07	7.22406e+06	-	-	-	not significant
S674	ACSL4_MOUSE	50790	Acsl4	0	0	0	1160624	1.25435e+06	1.06261e+06	-	-	-	not significant
S567	MTOR_MOUSE	56717	Mtor	0	0	0	1.56662e+06	2.00587e+06	887442	-	-	-	not significant
S345	CCNL2_MOUSE	56036	Ccnl2	0	0	0	786891	1.24465e+06	1.28972e+06	-	-	-	not significant
S270	PKHO1_MOUSE	67220	Plekho1	0	0	0	432557	604919	495298	-	-	-	not significant
S655	ACINU_MOUSE	56215	Acin1	0	0	0	2.25707e+06	1.82557e+06	1.83163e+06	-	-	-	not significant
S657	ACINU_MOUSE	56215	Acin1	0	0	0	2.25707e+06	1.82557e+06	1.83163e+06	-	-	-	not significant
T983	S12A4_MOUSE	20498	Slc12a4	0	0	0	3112883	3.10738e+06	3.3329e+06	-	-	-	not significant
S379	SPHK2_MOUSE	56632	Sphk2	0	0	0	4.351e+06	4.62768e+06	5.41858e+06	-	-	-	not significant
S470	ANKH_MOUSE	11732	Ankh	0	0	0	1.30056e+06	602606	1.09154e+06	-	-	-	not significant
S684	Q9JHF5_MOUSE	27060	Tcirg1	0	0	0	1.52559e+06	1.26793e+06	1.638e+06	-	-	-	not significant
S28	Q9ESU7_MOUSE	20514	Slc1a5	0	0	0	4.90961e+06	4.88487e+06	5.29471e+06	-	-	-	not significant
S602	BRD4_MOUSE	57261	Brd4	0	0	0	1.73949e+07	1.28914e+07	1.05345e+07	-	-	-	not significant
S1153	BRD4_MOUSE	57261	Brd4	0	0	0	942948	1.0102e+06	994016	-	-	-	not significant
S638	M3K20_MOUSE	65964	Map3k20	0	0	0	31133598	2.98286e+07	2.64157e+07	-	-	-	not significant
S646	RBCC1_MOUSE	12421	Rb1cc1	0	0	0	7878351	7.31245e+06	7.26295e+06	-	-	-	not significant
S652	RBCC1_MOUSE	12421	Rb1cc1	0	0	0	1.86752e+06	1.9721e+06	2.19532e+06	-	-	-	not significant
S623	RBCC1_MOUSE	12421	Rb1cc1	0	0	0	477719	874102	715584	-	-	-	not significant
S222	RBCC1_MOUSE	12421	Rb1cc1	0	0	0	3.13388e+06	2.24698e+06	2.23785e+06	-	-	-	not significant
T890	AFF4_MOUSE	93736	Aff4	0	0	0	1.37929e+06	1.14851e+06	1.97416e+06	-	-	-	not significant
S689	AFF4_MOUSE	93736	Aff4	0	0	0	1.70485e+06	2.2156e+06	1.9681e+06	-	-	-	not significant
S260	SHIP1_MOUSE	16331	Inpp5d	0	0	0	4.45893e+06	3.32248e+06	6.73543e+06	-	-	-	not significant
S173	SHIP1_MOUSE	16331	Inpp5d	0	0	0	1134761	968952	1.30716e+06	-	-	-	not significant
S236	ARHG7_MOUSE	54126	Arhgef7	0	0	0	780058	758833	1.12783e+06	-	-	-	not significant
S228	ARHG7_MOUSE	54126	Arhgef7	0	0	0	2.39386e+06	1.40881e+06	1.97364e+06	-	-	-	not significant
S401	PKHA2_MOUSE	83436	Plekha2	0	0	0	115348	179616	203487	-	-	-	not significant
S142	STX12_MOUSE	100226	Stx12	0	0	0	2.6209e+06	2.98841e+06	3.61682e+06	-	-	-	not significant
S511	OGA_MOUSE	76055	Oga	0	0	0	1.54792e+06	1.23568e+06	2.5969e+06	-	-	-	not significant
S459	EHD4_MOUSE	98878	Ehd4	0	0	0	936698	830204	819793	-	-	-	not significant
Y47	NKX24_MOUSE	228731	Nkx2-4	0	0	0	1.41819e+06	1.47133e+06	1.73592e+06	-	-	-	not significant
S81	S23A2_MOUSE	54338	Slc23a2	0	0	0	2415347	1.56578e+06	1.64991e+06	-	-	-	not significant
S1074	TSC1_MOUSE	64930	Tsc1	0	0	0	377452	886945	842733	-	-	-	not significant
S205	DTD1_MOUSE	66044	Dtd1	0	0	0	3.86631e+06	3.45687e+06	2.69644e+06	-	-	-	not significant
S340	PK1IP_MOUSE	68083	Pak1ip1	0	0	0	678985	1.07446e+06	464858	-	-	-	not significant
S483	TJAP1_MOUSE	74094	Tjap1	0	0	0	1.26373e+06	2.94633e+06	3.13134e+06	-	-	-	not significant
S93	Q9DCC5_MOUSE	12417	Cbx3	0	0	0	1.1792e+06	1.96217e+06	1.54956e+06	-	-	-	not significant
S95	Q9DCC5_MOUSE	12417	Cbx3	0	0	0	5.00033e+06	6.9367e+06	6.61733e+06	-	-	-	not significant
T552	AKAP8_MOUSE	56399	Akap8	0	0	0	989833	998050	1.28091e+06	-	-	-	not significant
S328	CWC25_MOUSE	67480	Cwc25	0	0	0	3211386	3.33413e+06	2.53213e+06	-	-	-	not significant
S260	Q9DBE5_MOUSE	22695	Zfp36	0	0	0	1.00204e+06	2.57615e+06	828535	-	-	-	not significant
S500	ZN654_MOUSE	72020	Znf654	0	0	0	2.73475e+06	1.6268e+06	2.39692e+06	-	-	-	not significant
S191	MRGBP_MOUSE	73247	Mrgbp	0	0	0	12729266	1.45959e+07	1.30947e+07	-	-	-	not significant
S193	SNX5_MOUSE	69178	Snx5	0	0	0	855441	890289	1.11861e+06	-	-	-	not significant
S173	GGCT_MOUSE	110175	Ggct	0	0	0	686379	740958	720799	-	-	-	not significant
S102	CF226_MOUSE	67101	2310039H08Rik	0	0	0	2.66623e+06	2.30125e+06	1.75483e+06	-	-	-	not significant
S429	RPAP3_MOUSE	71919	Rpap3	0	0	0	2.14145e+06	1.97764e+06	2.50753e+06	-	-	-	not significant
T208	PHF6_MOUSE	70998	Phf6	0	0	0	13109951	7.4715e+06	1.62112e+07	-	-	-	not significant
S840	AMOL1_MOUSE	75723	Amotl1	0	0	0	557884	588662	607033	-	-	-	not significant
T179	RPC3_MOUSE	74414	Polr3c	0	0	0	1.3997e+06	1.37997e+06	2.34019e+06	-	-	-	not significant
S459	CORO7_MOUSE	78885	Coro7	0	0	0	1085252	1.12459e+06	806947	-	-	-	not significant
S266	ZN687_MOUSE	78266	Znf687	0	0	0	2882767	2.22205e+06	2.53593e+06	-	-	-	not significant
S271	ZN687_MOUSE	78266	Znf687	0	0	0	2882767	2.22205e+06	2.53593e+06	-	-	-	not significant
S275	ZN687_MOUSE	78266	Znf687	0	0	0	2882767	2.22205e+06	2.53593e+06	-	-	-	not significant
S856	BCL9_MOUSE	77578	Bcl9	0	0	0	2.65906e+06	2.39166e+06	2.44564e+06	-	-	-	not significant
S441	BCL9_MOUSE	77578	Bcl9	0	0	0	3.17838e+06	1.29237e+06	3.3431e+06	-	-	-	not significant
S137	CHRD1_MOUSE	66917	Chordc1	0	0	0	4.67757e+06	4.0144e+06	3.8986e+06	-	-	-	not significant
S179	RAB1B_MOUSE	76308	Rab1b	0	0	0	2.5232e+06	2.505e+06	2.50957e+06	-	-	-	not significant
S8	SYTC_MOUSE	110960	Tars1	0	0	0	12618841	1.28136e+07	1.30194e+07	-	-	-	not significant
S700	HNRPM_MOUSE	76936	Hnrnpm	0	0	0	1.14143e+06	1.61254e+06	1.80629e+06	-	-	-	not significant
T88	TOM70_MOUSE	28185	Tomm70	0	0	0	1.43922e+06	2.45654e+06	2.76126e+06	-	-	-	not significant
S282	TOM70_MOUSE	28185	Tomm70	0	0	0	5.48469e+06	5.9755e+06	2.30521e+06	-	-	-	not significant
S76	CMS1_MOUSE	66497	Cmss1	0	0	0	1.14002e+06	1.42744e+06	1.20481e+06	-	-	-	not significant
S503	RPC5_MOUSE	26939	Polr3e	0	0	0	3008471	1.50184e+06	2.86688e+06	-	-	-	not significant
S226	SNX2_MOUSE	67804	Snx2	0	0	0	4.62484e+06	4.23451e+06	4.08369e+06	-	-	-	not significant
S100	MFR1L_MOUSE	76824	Mtfr1l	0	0	0	27260140	2.53008e+07	2.12547e+07	-	-	-	not significant
S274	MSD3_MOUSE	66665	Msantd3	0	0	0	3.28294e+06	3.48939e+06	3.02322e+06	-	-	-	not significant
S33	CYB5B_MOUSE	66427	Cyb5b	0	0	0	1.59929e+06	965961	1.50911e+06	-	-	-	not significant
S26	RETR3_MOUSE	67998	Retreg3	0	0	0	2.02161e+06	1.90253e+06	1.70796e+06	-	-	-	not significant
S130	NCBP2_MOUSE	68092	Ncbp2	0	0	0	1010497	1.18908e+06	1.09902e+06	-	-	-	not significant
S122	BHE41_MOUSE	79362	Bhlhe41	0	0	0	1.05039e+06	1.13541e+06	1.33129e+06	-	-	-	not significant
S85	TRI11_MOUSE	94091	Trim11	0	0	0	1.0058e+06	631707	952241	-	-	-	not significant
S344	RTN4_MOUSE	68585	Rtn4	0	0	0	1.61646e+06	1.9257e+06	2.29154e+06	-	-	-	not significant
S621	RAF1_MOUSE	110157	Raf1	0	0	0	1.602e+06	2.97148e+06	2.90295e+06	-	-	-	not significant
S622	ASH1L_MOUSE	192195	Ash1l	0	0	0	1.05836e+06	894570	912087	-	-	-	not significant
S85	DDX50_MOUSE	94213	Ddx50	0	0	0	1.94721e+06	1.45859e+06	1.15154e+06	-	-	-	not significant
T536	WDR6_MOUSE	83669	Wdr6	0	0	0	2943073	1.42698e+06	2.50195e+06	-	-	-	not significant
S19	CD003_MOUSE	67704	1810037I17Rik	0	0	0	13870965	2.03219e+07	2.06203e+07	-	-	-	not significant
S522	CT2NL_MOUSE	80281	Cttnbp2nl	0	0	0	3.31235e+06	2.68034e+06	3.1359e+06	-	-	-	not significant
S691	CSTF3_MOUSE	228410	Cstf3	0	0	0	2.36139e+06	3.5742e+06	1.90164e+06	-	-	-	not significant
S292	ARRD1_MOUSE	215705	Arrdc1	0	0	0	844379	881049	893760	-	-	-	not significant
S94	RRAGC_MOUSE	54170	Rragc	0	0	0	10734967	1.12781e+07	1.04189e+07	-	-	-	not significant
S778	PDXD1_MOUSE	94184	Pdxdc1	0	0	0	1.02078e+06	1.42595e+06	1.1339e+06	-	-	-	not significant
S15	SMRD2_MOUSE	83796	Smarcd2	0	0	0	10249914	9.59922e+06	9.74068e+06	-	-	-	not significant
T605	KLH22_MOUSE	224023	Klhl22	0	0	0	3.00181e+06	1.93586e+06	2.34322e+06	-	-	-	not significant
S119	THUM1_MOUSE	233802	Thumpd1	0	0	0	1.3316e+06	1.64298e+06	1.22417e+06	-	-	-	not significant
S96	WAC_MOUSE	225131	Wac	0	0	0	1.57479e+06	1.09359e+06	1.91607e+06	-	-	-	not significant
S94	WAC_MOUSE	225131	Wac	0	0	0	2.63177e+06	2.13249e+06	3.21467e+06	-	-	-	not significant
S46	SIR1_MOUSE	93759	Sirt1	0	0	0	2.19426e+06	2.42682e+07	2.20453e+06	-	-	-	not significant
S194	CLIP1_MOUSE	56430	Clip1	0	0	0	1.16401e+06	1.3336e+06	1.36982e+06	-	-	-	not significant
S249	SYDC_MOUSE	226414	Dars1	0	0	0	1839052	866313	1.09025e+06	-	-	-	not significant
S1686	BRWD1_MOUSE	93871	Brwd1	0	0	0	590406	651741	681971	-	-	-	not significant
S1455	WDR7_MOUSE	104082	Wdr7	0	0	0	1.57166e+06	1.40425e+06	1.6765e+06	-	-	-	not significant
S369	FRM4B_MOUSE	232288	Frmd4b	0	0	0	1.02667e+06	1.44544e+06	1.06958e+06	-	-	-	not significant
S136	SMCA5_MOUSE	93762	Smarca5	0	0	0	522408	616160	458262	-	-	-	not significant
S702	FGD4_MOUSE	224014	Fgd4	0	0	0	2.3493e+06	2.92029e+06	2.26098e+06	-	-	-	not significant
S1087	BMP2K_MOUSE	140780	Bmp2k	0	0	0	3.04508e+06	2.66224e+06	2.68145e+06	-	-	-	not significant
S63	Q91Z78_MOUSE	12177	Bnip3l	0	0	0	2.02921e+06	2.42808e+06	1.59197e+06	-	-	-	not significant
S152	MSD4_MOUSE	78100	Msantd4	0	0	0	624625	551903	459514	-	-	-	not significant
T106	RN185_MOUSE	193670	Rnf185	0	0	0	17795360	1.47509e+07	1.15412e+07	-	-	-	not significant
S980	RHG35_MOUSE	232906	Arhgap35	0	0	0	1388522	811186	910370	-	-	-	not significant
S1150	RHG35_MOUSE	232906	Arhgap35	0	0	0	1.09174e+06	1.01878e+06	1.39866e+06	-	-	-	not significant
S92	BASP1_MOUSE	70350	Basp1	0	0	0	1.34687e+06	1.41286e+06	816200	-	-	-	not significant
S167	BASP1_MOUSE	70350	Basp1	0	0	0	1.47869e+06	1.11465e+06	1.38374e+06	-	-	-	not significant
S178	TREX1_MOUSE	22040	Trex1	0	0	0	1.04239e+06	775608	1.22239e+06	-	-	-	not significant
S112	DJC17_MOUSE	69408	Dnajc17	0	0	0	313285	2.8872e+06	226225	-	-	-	not significant
T233	ASCC2_MOUSE	75452	Ascc2	0	0	0	637005	732104	765755	-	-	-	not significant
S192	SNX11_MOUSE	74479	Snx11	0	0	0	2121759	1.596e+06	2.00805e+06	-	-	-	not significant
S194	SNX11_MOUSE	74479	Snx11	0	0	0	2121759	1.596e+06	2.00805e+06	-	-	-	not significant
S90	AAKG2_MOUSE	108099	Prkag2	0	0	0	1.77593e+06	1.8935e+06	1.59136e+06	-	-	-	not significant
S29	NCOA5_MOUSE	228869	Ncoa5	0	0	0	2163032	2.11766e+06	5.93085e+06	-	-	-	not significant
S34	NCOA5_MOUSE	228869	Ncoa5	0	0	0	2163032	2.11766e+06	5.93085e+06	-	-	-	not significant
S44	Q91V89_MOUSE	21770	Ppp2r5d	0	0	0	36539211	2.61456e+07	2.36043e+07	-	-	-	not significant
S180	RAB14_MOUSE	68365	Rab14	0	0	0	966976	1.3641e+06	2.00854e+06	-	-	-	not significant
S395	CNO6L_MOUSE	231464	Cnot6l	0	0	0	1.15107e+06	1.01148e+06	1.25752e+06	-	-	-	not significant
S368	SIR2_MOUSE	64383	Sirt2	0	0	0	2.99771e+06	2.26928e+06	2.56504e+06	-	-	-	not significant
S124	CCAR2_MOUSE	219158	Ccar2	0	0	0	646775	612218	784685	-	-	-	not significant
S1943	MYH9_MOUSE	17886	Myh9	0	0	0	3.32816e+07	3.61684e+07	3.45588e+07	-	-	-	not significant
T439	NDC1_MOUSE	72787	Ndc1	0	0	0	579838	984803	651164	-	-	-	not significant
S434	NDC1_MOUSE	72787	Ndc1	0	0	0	680996	888889	935723	-	-	-	not significant
S699	APOBR_MOUSE	171504	Apobr	0	0	0	4.18558e+06	3.23772e+06	3.77469e+06	-	-	-	not significant
S520	APOBR_MOUSE	171504	Apobr	0	0	0	1.18601e+06	1.54255e+06	1.44833e+06	-	-	-	not significant
S537	AB1IP_MOUSE	54519	Apbb1ip	0	0	0	11151425	9.94569e+06	8.76103e+06	-	-	-	not significant
S251	MIB2_MOUSE	76580	Mib2	0	0	0	4569611	2.93085e+06	3.42928e+06	-	-	-	not significant
S175	ETV3_MOUSE	27049	Etv3	0	0	0	2.20245e+06	1.59656e+06	1.73703e+06	-	-	-	not significant
T272	NUP35_MOUSE	69482	Nup35	0	0	0	2.37813e+06	2.26478e+06	1.61049e+06	-	-	-	not significant
S637	ARHGC_MOUSE	69632	Arhgef12	0	0	0	2.3651e+06	3.07758e+06	2.63747e+06	-	-	-	not significant
S384	I2BP1_MOUSE	272359	Irf2bp1	0	0	0	2.18128e+06	2.87664e+06	3.69842e+06	-	-	-	not significant
S148	NOP14_MOUSE	75416	Nop14	0	0	0	2.89025e+06	3.61553e+06	4.16895e+06	-	-	-	not significant
S334	TDIF2_MOUSE	99480	Dnttip2	0	0	0	1.44477e+06	1.31773e+06	1.30086e+06	-	-	-	not significant
T157	BUD13_MOUSE	215051	Bud13	0	0	0	1212232	2.12851e+06	1.86322e+06	-	-	-	not significant
T144	BUD13_MOUSE	215051	Bud13	0	0	0	3.42647e+06	3.02426e+06	3.16157e+06	-	-	-	not significant
S148	BUD13_MOUSE	215051	Bud13	0	0	0	3.42647e+06	3.02426e+06	3.16157e+06	-	-	-	not significant
T131	BUD13_MOUSE	215051	Bud13	0	0	0	1.02977e+06	1.23606e+06	720680	-	-	-	not significant
S238	BUD13_MOUSE	215051	Bud13	0	0	0	4.7925e+06	4.35872e+06	4.88222e+06	-	-	-	not significant
S360	ENOX2_MOUSE	209224	Enox2	0	0	0	893146	837324	722806	-	-	-	not significant
S85	Q8R055_MOUSE	16881	Lig1	0	0	0	2971550	2.41116e+06	2.58875e+06	-	-	-	not significant
S102	Q8R055_MOUSE	16881	Lig1	0	0	0	2971550	2.41116e+06	2.58875e+06	-	-	-	not significant
S62	FLCN_MOUSE	216805	Flcn	0	0	0	3.44261e+06	2.69928e+06	3.68379e+06	-	-	-	not significant
S722	RPTOR_MOUSE	74370	Rptor	0	0	0	13851646	1.26783e+07	1.08183e+07	-	-	-	not significant
S449	MTA1_MOUSE	116870	Mta1	0	0	0	34432898	3.28312e+07	2.92169e+07	-	-	-	not significant
S313	I2BPL_MOUSE	238330	Irf2bpl	0	0	0	4.66486e+06	4.914e+06	4.72237e+06	-	-	-	not significant
S315	I2BPL_MOUSE	238330	Irf2bpl	0	0	0	2.90154e+06	3.36478e+06	3.1433e+06	-	-	-	not significant
S1114	PLCL2_MOUSE	224860	Plcl2	0	0	0	6410104	5.24783e+06	4.39619e+06	-	-	-	not significant
S643	CHAP1_MOUSE	101994	Champ1	0	0	0	1.29228e+06	1.35383e+06	1.10811e+06	-	-	-	not significant
S598	MATR3_MOUSE	17184	Matr3	0	0	0	2773569	2.61984e+06	2.27294e+06	-	-	-	not significant
S604	MATR3_MOUSE	17184	Matr3	0	0	0	2773569	2.61984e+06	2.27294e+06	-	-	-	not significant
T45	ZN668_MOUSE	244219	Znf668	0	0	0	929060	2.33368e+06	608719	-	-	-	not significant
S473	SHOT1_MOUSE	71653	Shtn1	0	0	0	1.96575e+06	1.78353e+06	1.90465e+06	-	-	-	not significant
S432	FNTB_MOUSE	110606	Fntb	0	0	0	1980419	1.82062e+06	1.85491e+06	-	-	-	not significant
S238	LRC25_MOUSE	211228	Lrrc25	0	0	0	720452	997392	1.34743e+06	-	-	-	not significant
S363	Q8K1K3_MOUSE	28113	Tinf2	0	0	0	3.11427e+06	2.85742e+06	2.8854e+06	-	-	-	not significant
S236	PKHO2_MOUSE	102595	Plekho2	0	0	0	2033839	2.27083e+06	2.21154e+06	-	-	-	not significant
S239	PKHO2_MOUSE	102595	Plekho2	0	0	0	2033839	2.27083e+06	2.21154e+06	-	-	-	not significant
S238	PKHO2_MOUSE	102595	Plekho2	0	0	0	7.21416e+06	8.06613e+06	8.0244e+06	-	-	-	not significant
S65	RHG18_MOUSE	73910	Arhgap18	0	0	0	1355182	1.1813e+06	1.14508e+06	-	-	-	not significant
T256	BCLF1_MOUSE	72567	Bclaf1	0	0	0	581834	588554	1.00305e+06	-	-	-	not significant
S267	BCLF1_MOUSE	72567	Bclaf1	0	0	0	1.28308e+07	7.31877e+06	5.9211e+06	-	-	-	not significant
S646	BCLF1_MOUSE	72567	Bclaf1	0	0	0	12536374	2.26134e+07	1.82329e+07	-	-	-	not significant
S194	CKLF4_MOUSE	97487	Cmtm4	0	0	0	41252852	2.75196e+07	3.80865e+07	-	-	-	not significant
S248	SLAI2_MOUSE	75991	Slain2	0	0	0	2.67095e+06	2.53928e+06	2.64334e+06	-	-	-	not significant
S192	EPN2_MOUSE	13855	Epn2	0	0	0	1.08933e+06	930372	1.34969e+06	-	-	-	not significant
S195	EPN2_MOUSE	13855	Epn2	0	0	0	1.08933e+06	930372	1.34969e+06	-	-	-	not significant
S201	EPN2_MOUSE	13855	Epn2	0	0	0	1.08933e+06	930372	1.34969e+06	-	-	-	not significant
S851	ZC3H3_MOUSE	223642	Zc3h3	0	0	0	1.25549e+06	1.13749e+06	1.43982e+06	-	-	-	not significant
S976	BICRL_MOUSE	210982	Bicral	0	0	0	1.12949e+06	1.92924e+06	1.6726e+06	-	-	-	not significant
S292	WDR47_MOUSE	99512	Wdr47	0	0	0	2.58605e+06	2.04605e+06	1.25662e+06	-	-	-	not significant
S944	SYEP_MOUSE	107508	Eprs1	0	0	0	1.62382e+06	2.14523e+06	1.91421e+06	-	-	-	not significant
S1682	SET1B_MOUSE	208043	Setd1b	0	0	0	849824	1159763	873914	-	-	-	not significant
S121	RCOR1_MOUSE	217864	Rcor1	0	0	0	1.62849e+06	1.10822e+06	1.3232e+06	-	-	-	not significant
S180	ZN263_MOUSE	74120	Znf263	0	0	0	877755	772163	979233	-	-	-	not significant
S146	Q8C898_MOUSE	620078	C130026I21Rik	0	0	0	9683722	6.60707e+06	5.89779e+06	-	-	-	not significant
S309	LIN9_MOUSE	72568	Lin9	0	0	0	2.90216e+06	3.19881e+06	2.76536e+06	-	-	-	not significant
S397	DEN2A_MOUSE	209773	Dennd2a	0	0	0	993901	1.31326e+06	1.3041e+06	-	-	-	not significant
S161	AIDA_MOUSE	108909	Aida	0	0	0	1.14983e+06	1.42814e+06	890918	-	-	-	not significant
S44	YIPF4_MOUSE	67864	Yipf4	0	0	0	552619	479927	636401	-	-	-	not significant
S23	Q8C2Q7_MOUSE	59013	Hnrnph1	0	0	0	843402	1.13715e+06	1.02204e+06	-	-	-	not significant
S198	ARH_MOUSE	100017	Ldlrap1	0	0	0	1.52336e+06	1.46283e+06	2.34166e+06	-	-	-	not significant
S741	TLK1_MOUSE	228012	Tlk1	0	0	0	3.02507e+06	2.89725e+06	3.31635e+06	-	-	-	not significant
S1412	SI1L1_MOUSE	217692	Sipa1l1	0	0	0	1.36489e+06	1.19762e+06	1.65528e+06	-	-	-	not significant
S389	GWL_MOUSE	67121	Mastl	0	0	0	1259993	1.26464e+06	1.11567e+06	-	-	-	not significant
S101	Q8BZY3_MOUSE	234733	Ddx19b	0	0	0	700870	863949	723231	-	-	-	not significant
S396	RHG25_MOUSE	232201	Arhgap25	0	0	0	5142160	8.1333e+06	5.27005e+06	-	-	-	not significant
S385	YTHD3_MOUSE	229096	Ythdf3	0	0	0	658349	739228	823414	-	-	-	not significant
S633	TBC17_MOUSE	233204	Tbc1d17	0	0	0	1.22819e+06	1.12866e+06	1.11479e+06	-	-	-	not significant
S634	TBC17_MOUSE	233204	Tbc1d17	0	0	0	1.22819e+06	1.12866e+06	1.11479e+06	-	-	-	not significant
S871	VP13C_MOUSE	320528	Vps13c	0	0	0	1.90744e+06	1.02791e+06	508004	-	-	-	not significant
S873	VP13C_MOUSE	320528	Vps13c	0	0	0	1.90744e+06	1.02791e+06	508004	-	-	-	not significant
S3609	VP13C_MOUSE	320528	Vps13c	0	0	0	6420601	6.32759e+06	5.44082e+06	-	-	-	not significant
S79	PGAM5_MOUSE	72542	Pgam5	0	0	0	1.21081e+06	963253	1.248e+06	-	-	-	not significant
T282	Q8BVY4_MOUSE	109115	Supt3	0	0	0	8829556	7.5529e+06	8.5849e+06	-	-	-	not significant
S354	Q8BVV6_MOUSE	217869	Eif5	0	0	0	3066704	2.57289e+06	1.80804e+06	-	-	-	not significant
S10	Q8BVV6_MOUSE	217869	Eif5	0	0	0	1532639	1.63298e+06	1.58783e+06	-	-	-	not significant
S409	SNX17_MOUSE	266781	Snx17	0	0	0	1.29815e+06	1.99067e+06	1.11251e+06	-	-	-	not significant
S281	LSM11_MOUSE	72290	Lsm11	0	0	0	3.01327e+06	3.65751e+06	2.90467e+06	-	-	-	not significant
T158	SEC62_MOUSE	69276	Sec62	0	0	0	3.0172e+06	4.53864e+06	2.46391e+06	-	-	-	not significant
S1683	SRRM2_MOUSE	75956	Srrm2	0	0	0	3.32515e+06	3.4701e+06	3.49555e+06	-	-	-	not significant
S1685	SRRM2_MOUSE	75956	Srrm2	0	0	0	3.32515e+06	3.4701e+06	3.49555e+06	-	-	-	not significant
S531	SRRM2_MOUSE	75956	Srrm2	0	0	0	2.39207e+06	2.18731e+06	3.07297e+06	-	-	-	not significant
S533	SRRM2_MOUSE	75956	Srrm2	0	0	0	2.39207e+06	2.18731e+06	3.07297e+06	-	-	-	not significant
S452	SRRM2_MOUSE	75956	Srrm2	0	0	0	2.38844e+06	3.20257e+06	2.32861e+06	-	-	-	not significant
S453	SRRM2_MOUSE	75956	Srrm2	0	0	0	2.38844e+06	3.20257e+06	2.32861e+06	-	-	-	not significant
S2660	SRRM2_MOUSE	75956	Srrm2	0	0	0	1.60921e+06	2.4432e+06	2.28757e+06	-	-	-	not significant
S2360	SRRM2_MOUSE	75956	Srrm2	0	0	0	3850100	3.74621e+06	4.48145e+06	-	-	-	not significant
T2362	SRRM2_MOUSE	75956	Srrm2	0	0	0	10188640	1.26876e+07	1.42008e+07	-	-	-	not significant
S1924	SRRM2_MOUSE	75956	Srrm2	0	0	0	5095623	7.8235e+06	5.91784e+06	-	-	-	not significant
S1927	SRRM2_MOUSE	75956	Srrm2	0	0	0	6.06873e+06	4.04887e+07	6.91332e+06	-	-	-	not significant
S1869	SRRM2_MOUSE	75956	Srrm2	0	0	0	4.49326e+06	6.08549e+06	4.96747e+06	-	-	-	not significant
S1604	SRRM2_MOUSE	75956	Srrm2	0	0	0	8.50407e+06	7.90156e+06	8.08692e+06	-	-	-	not significant
S1495	SRRM2_MOUSE	75956	Srrm2	0	0	0	5661350	7.21612e+06	7.02984e+06	-	-	-	not significant
S1497	SRRM2_MOUSE	75956	Srrm2	0	0	0	5661350	7.21612e+06	7.02984e+06	-	-	-	not significant
S898	SRRM2_MOUSE	75956	Srrm2	0	0	0	1.567e+06	1.59666e+06	2.3407e+06	-	-	-	not significant
S2381	SRRM2_MOUSE	75956	Srrm2	0	0	0	1.51155e+06	1.16933e+06	1.29659e+06	-	-	-	not significant
S1508	SRRM2_MOUSE	75956	Srrm2	0	0	0	2.74565e+07	2.63171e+07	2.15246e+07	-	-	-	not significant
S1179	SRRM2_MOUSE	75956	Srrm2	0	0	0	353540	309733	441660	-	-	-	not significant
S23	CEP55_MOUSE	74107	Cep55	0	0	0	13710580	7.3642e+06	1.26099e+07	-	-	-	not significant
S88	Q8BSN6_MOUSE	53330	Vamp4	0	0	0	1.19579e+06	1.27079e+06	1.16379e+06	-	-	-	not significant
S250	F10C1_MOUSE	70567	Fra10ac1	0	0	0	1.23627e+06	1.88691e+06	1.48381e+06	-	-	-	not significant
S320	KBTBB_MOUSE	74901	Kbtbd11	0	0	0	3.92475e+06	4.331e+06	4.63706e+06	-	-	-	not significant
S70	SYQ_MOUSE	97541	Qars1	0	0	0	852457	721286	775375	-	-	-	not significant
S1032	ARI5B_MOUSE	71371	Arid5b	0	0	0	841183	765429	660413	-	-	-	not significant
S51	Q8BLP0_MOUSE	74718	Snx16	0	0	0	612726	495145	521254	-	-	-	not significant
S362	PHF20_MOUSE	228829	Phf20	0	0	0	1.74056e+06	1.63655e+06	612485	-	-	-	not significant
S827	IPO5_MOUSE	70572	Ipo5	0	0	0	1.95232e+06	1.52408e+06	1.98442e+06	-	-	-	not significant
S112	Q8BJR1_MOUSE	104156	Etv5	0	0	0	2.74969e+06	2.6057e+06	2.91741e+06	-	-	-	not significant
S33	SNIP1_MOUSE	76793	Snip1	0	0	0	21294070	1.54678e+07	1.24515e+07	-	-	-	not significant
S124	CARF_MOUSE	70925	Cdkn2aip	0	0	0	2.32142e+06	2.05558e+06	2.73318e+06	-	-	-	not significant
S326	ZN592_MOUSE	233410	Znf592	0	0	0	1.84003e+06	1.92505e+06	1.72704e+06	-	-	-	not significant
S329	ZN592_MOUSE	233410	Znf592	0	0	0	1.84003e+06	1.92505e+06	1.72704e+06	-	-	-	not significant
S332	ZN592_MOUSE	233410	Znf592	0	0	0	1.84003e+06	1.92505e+06	1.72704e+06	-	-	-	not significant
S470	EHD2_MOUSE	259300	Ehd2	0	0	0	1872436	2.42388e+06	2.27541e+06	-	-	-	not significant
S438	EHD2_MOUSE	259300	Ehd2	0	0	0	2.48393e+06	2.36046e+06	2.70472e+06	-	-	-	not significant
T562	CDC23_MOUSE	52563	Cdc23	0	0	0	1.66504e+06	1.94592e+06	1.89954e+06	-	-	-	not significant
S100	CCNY_MOUSE	67974	Ccny	0	0	0	1.1338e+06	913434	1.13625e+06	-	-	-	not significant
S291	MILK1_MOUSE	27008	Micall1	0	0	0	2.56801e+06	2.60355e+06	1.61312e+06	-	-	-	not significant
S418	IF4B_MOUSE	75705	Eif4b	0	0	0	4997225	4.09792e+06	3.56136e+06	-	-	-	not significant
S495	IF4B_MOUSE	75705	Eif4b	0	0	0	2.04231e+06	1.58246e+06	2.20169e+06	-	-	-	not significant
S116	ROA3_MOUSE	229279	Hnrnpa3	0	0	0	10671233	9.54136e+06	9.04106e+06	-	-	-	not significant
S21	CPEB2_MOUSE	231207	Cpeb2	0	0	0	1.06032e+06	848036	1.14417e+06	-	-	-	not significant
S326	CTIP_MOUSE	225182	Rbbp8	0	0	0	4.42282e+06	4.40438e+06	3.71223e+06	-	-	-	not significant
S447	DDHD2_MOUSE	72108	Ddhd2	0	0	0	2319726	1.92436e+06	2.66902e+06	-	-	-	not significant
S986	KDM5B_MOUSE	75605	Kdm5b	0	0	0	2.90627e+06	2.9316e+06	3.23027e+06	-	-	-	not significant
S1169	KDM5B_MOUSE	75605	Kdm5b	0	0	0	1048783	1.11595e+06	1.21279e+06	-	-	-	not significant
S550	SMAG2_MOUSE	233033	Samd4b	0	0	0	539842	688757	554876	-	-	-	not significant
S796	TBCD5_MOUSE	72238	Tbc1d5	0	0	0	6.05232e+06	5.47607e+06	4.5161e+06	-	-	-	not significant
S983	FLNB_MOUSE	286940	Flnb	0	0	0	1.18532e+06	1.53679e+06	1.26679e+06	-	-	-	not significant
S1276	SYMPK_MOUSE	68188	Sympk	0	0	0	1.44499e+06	2.59873e+06	2.41654e+06	-	-	-	not significant
S624	UBP2L_MOUSE	74383	Ubap2l	0	0	0	6.99144e+06	7.68038e+06	7.25269e+06	-	-	-	not significant
S625	UBP2L_MOUSE	74383	Ubap2l	0	0	0	6.99144e+06	7.68038e+06	7.25269e+06	-	-	-	not significant
S879	UBP2L_MOUSE	74383	Ubap2l	0	0	0	1.08529e+06	1.03189e+06	1.09358e+06	-	-	-	not significant
S418	UBP2L_MOUSE	74383	Ubap2l	0	0	0	1.06865e+06	1.1289e+06	2.13601e+06	-	-	-	not significant
S651	ACSF4_MOUSE	231326	Aasdh	0	0	0	2.06221e+06	2.34049e+06	2.52381e+06	-	-	-	not significant
S395	WIPI2_MOUSE	74781	Wipi2	0	0	0	15782164	1.3962e+07	1.25448e+07	-	-	-	not significant
S154	Q80VE5_MOUSE	381085	Tbc1d22b	0	0	0	1.10257e+06	1.37483e+06	1.50766e+06	-	-	-	not significant
S930	NU214_MOUSE	227720	Nup214	0	0	0	1.01466e+06	1.07073e+06	1.56739e+06	-	-	-	not significant
S1490	SCRIB_MOUSE	105782	Scrib	0	0	0	1.33254e+06	1.09051e+06	1.494e+06	-	-	-	not significant
S310	ZFY16_MOUSE	218441	Zfyve16	0	0	0	4573234	4.38285e+06	4.1811e+06	-	-	-	not significant
S656	RERE_MOUSE	68703	Rere	0	0	0	21430032	2.3361e+07	2.22445e+07	-	-	-	not significant
S817	PHF8_MOUSE	320595	Phf8	0	0	0	981095	1.27539e+06	947678	-	-	-	not significant
S28	ASTRB_MOUSE	235283	Gramd1b	0	0	0	10339219	9.36561e+06	9.88397e+06	-	-	-	not significant
S1695	MRCKB_MOUSE	217866	Cdc42bpb	0	0	0	20357918	2.35181e+07	2.35422e+07	-	-	-	not significant
T616	Q7TT35	-	-	0	0	0	1.74359e+06	2.16635e+06	1.85256e+06	-	-	-	not significant
S514	REXO1_MOUSE	66932	Rexo1	0	0	0	945387	1.43142e+06	1.06751e+06	-	-	-	not significant
S885	MCAF1_MOUSE	54343	Atf7ip	0	0	0	2.28257e+06	7.41626e+06	2.3364e+06	-	-	-	not significant
S491	PKHM1_MOUSE	353047	Plekhm1	0	0	0	2.04115e+06	1.66393e+06	1.49383e+06	-	-	-	not significant
S404	PKHM1_MOUSE	353047	Plekhm1	0	0	0	2.68133e+06	2.06855e+06	1.88304e+06	-	-	-	not significant
S116	ZN516_MOUSE	329003	Znf516	0	0	0	2.34189e+06	2.73657e+06	2.87612e+06	-	-	-	not significant
S19	KPBB_MOUSE	102093	Phkb	0	0	0	1.83786e+06	1.96888e+06	2.36498e+06	-	-	-	not significant
S628	Q7TS64_MOUSE	110355	Grk2	0	0	0	4767749	3.47553e+06	2.49059e+06	-	-	-	not significant
S123	APTX_MOUSE	66408	Aptx	0	0	0	2.29947e+06	1.47123e+06	4.14651e+06	-	-	-	not significant
S456	MBB1A_MOUSE	18432	Mybbp1a	0	0	0	1.99967e+06	2.11041e+06	2.0602e+06	-	-	-	not significant
S247	DEK_MOUSE	110052	Dek	0	0	0	1.14584e+08	8.38683e+07	8.12331e+07	-	-	-	not significant
S248	DEK_MOUSE	110052	Dek	0	0	0	1.13816e+08	8.31948e+07	8.05086e+07	-	-	-	not significant
S255	DEK_MOUSE	110052	Dek	0	0	0	1.14584e+08	8.38683e+07	8.12331e+07	-	-	-	not significant
S219	SPAG7_MOUSE	216873	Spag7	0	0	0	9266991	7.91703e+06	9.70055e+06	-	-	-	not significant
S648	HUWE1_MOUSE	59026	Huwe1	0	0	0	1.37827e+06	1.12948e+06	911949	-	-	-	not significant
S3818	HUWE1_MOUSE	59026	Huwe1	0	0	0	2171824	1.56609e+06	1.78551e+06	-	-	-	not significant
S3663	HUWE1_MOUSE	59026	Huwe1	0	0	0	3.14362e+06	2.90316e+06	3.20228e+06	-	-	-	not significant
S522	Q7M739_MOUSE	108989	Tpr	0	0	0	972417	1.05187e+06	1.49576e+06	-	-	-	not significant
S147	ZNRF2_MOUSE	387524	Znrf2	0	0	0	1.04936e+06	714712	848588	-	-	-	not significant
S107	ZNRF2_MOUSE	387524	Znrf2	0	0	0	1.92114e+06	2.32196e+06	1.93506e+06	-	-	-	not significant
S545	KDM3B_MOUSE	277250	Kdm3b	0	0	0	2.22465e+06	3.27643e+06	3.43857e+06	-	-	-	not significant
S738	AKIB1_MOUSE	70797	Ankib1	0	0	0	4285634	4.52182e+06	3.24139e+06	-	-	-	not significant
T501	TACC1_MOUSE	320165	Tacc1	0	0	0	6.8209e+06	6.29052e+06	9.56377e+06	-	-	-	not significant
S900	Q6XZL8_MOUSE	208266	Dot1l	0	0	0	4.24174e+06	3.67516e+06	3.52492e+06	-	-	-	not significant
T430	KMT5C_MOUSE	232811	Kmt5c	0	0	0	606668	511175	976567	-	-	-	not significant
S329	AT2B4_MOUSE	381290	Atp2b4	0	0	0	1.96829e+06	1.37417e+06	2.06215e+06	-	-	-	not significant
S181	CEBPE_MOUSE	110794	Cebpe	0	0	0	971570	1.08506e+06	1.14947e+06	-	-	-	not significant
S365	GMIP_MOUSE	78816	Gmip	0	0	0	1.63721e+07	8.39958e+06	1.55828e+07	-	-	-	not significant
S642	Q6PGF5_MOUSE	213895	Bms1	0	0	0	3.67783e+06	3.62553e+06	2.60075e+06	-	-	-	not significant
S117	Q6PFC0_MOUSE	207592	Tbc1d16	0	0	0	1805649	1.73138e+06	1.63212e+06	-	-	-	not significant
S1528	CHD4_MOUSE	107932	Chd4	0	0	0	2.58094e+06	1.22723e+06	1.41505e+06	-	-	-	not significant
S207	MSL1_MOUSE	74026	Msl1	0	0	0	1.52023e+06	1.83276e+06	1.56747e+06	-	-	-	not significant
S150	INT6_MOUSE	18130	Ints6	0	0	0	1.97463e+06	1.83459e+06	2.00478e+06	-	-	-	not significant
T434	KDM3A_MOUSE	104263	Kdm3a	0	0	0	1.56362e+06	1.48286e+06	1.39573e+06	-	-	-	not significant
S842	AHDC1_MOUSE	230793	Ahdc1	0	0	0	296242	503380	232566	-	-	-	not significant
S340	FKB15_MOUSE	338355	Fkbp15	0	0	0	14144690	1.21995e+07	1.60464e+07	-	-	-	not significant
S527	FHOD1_MOUSE	234686	Fhod1	0	0	0	753249	703163	880297	-	-	-	not significant
S496	TTYH3_MOUSE	78339	Ttyh3	0	0	0	4.67116e+06	5.0478e+06	4.84965e+06	-	-	-	not significant
S1922	SMHD1_MOUSE	74355	Smchd1	0	0	0	1.78947e+06	1.75634e+06	1.56964e+06	-	-	-	not significant
T221	SIK3_MOUSE	70661	Sik3	0	0	0	3.56534e+06	3.40867e+06	3.64812e+06	-	-	-	not significant
S618	SIK3_MOUSE	70661	Sik3	0	0	0	1.88775e+06	1.47683e+06	1.30632e+06	-	-	-	not significant
S535	ANKL2_MOUSE	71782	Ankle2	0	0	0	3.93512e+06	3.98396e+06	3.96461e+06	-	-	-	not significant
S988	SLX4_MOUSE	52864	Slx4	0	0	0	895139	976890	1.07815e+06	-	-	-	not significant
S289	GPBL1_MOUSE	77110	Gpbp1l1	0	0	0	1.03052e+06	1.24449e+06	1.14028e+06	-	-	-	not significant
S387	Q6NZH9_MOUSE	240168	Rasgrp3	0	0	0	4112376	4.43479e+06	5.10405e+06	-	-	-	not significant
S153	CPSF6_MOUSE	432508	Cpsf6	0	0	0	6.4115e+06	2.74968e+06	1.09385e+06	-	-	-	not significant
T301	RETR2_MOUSE	227298	Retreg2	0	0	0	2.03058e+06	1.24018e+06	1.37862e+06	-	-	-	not significant
S1470	RRP5_MOUSE	18572	Pdcd11	0	0	0	2.55722e+06	2.56965e+06	2.65013e+06	-	-	-	not significant
T724	NIPBL_MOUSE	71175	Nipbl	0	0	0	1.24477e+06	2.00342e+06	1.57958e+06	-	-	-	not significant
S571	JADE3_MOUSE	382207	Jade3	0	0	0	10076082	1.01921e+07	8.82668e+06	-	-	-	not significant
S473	NCK5L_MOUSE	380969	Nckap5l	0	0	0	9.10601e+06	9.16341e+06	6.03123e+06	-	-	-	not significant
S436	NCK5L_MOUSE	380969	Nckap5l	0	0	0	1.29292e+06	1.46125e+06	1.61826e+06	-	-	-	not significant
S145	LEMD2_MOUSE	224640	Lemd2	0	0	0	3.14385e+07	2.75138e+07	2.52683e+07	-	-	-	not significant
S149	LEMD2_MOUSE	224640	Lemd2	0	0	0	2.93214e+07	2.5201e+07	2.29987e+07	-	-	-	not significant
S150	LEMD2_MOUSE	224640	Lemd2	0	0	0	2.93214e+07	2.5201e+07	2.29987e+07	-	-	-	not significant
S1786	Q6DFZ1_MOUSE	107338	Gbf1	0	0	0	1.44462e+07	1.44384e+07	1.15802e+07	-	-	-	not significant
S1760	HELZ_MOUSE	78455	Helz	0	0	0	1.59126e+06	3.42615e+06	3.35416e+06	-	-	-	not significant
S241	RFTN1_MOUSE	76438	Rftn1	0	0	0	9.76342e+06	8.43716e+06	7.41764e+06	-	-	-	not significant
S739	LAR4B_MOUSE	217980	Larp4b	0	0	0	470924	838854	575907	-	-	-	not significant
S41	LAR4B_MOUSE	217980	Larp4b	0	0	0	1.32973e+06	1.24052e+06	1.27906e+06	-	-	-	not significant
S795	TASOR_MOUSE	218850	Tasor	0	0	0	1.30373e+06	1.2647e+06	1.07142e+06	-	-	-	not significant
S357	HECD1_MOUSE	207304	Hectd1	0	0	0	1.0483e+06	1.68767e+06	1.29995e+06	-	-	-	not significant
S314	PREX1_MOUSE	277360	Prex1	0	0	0	392045	372507	298189	-	-	-	not significant
S1171	RIC1_MOUSE	226089	Ric1	0	0	0	1.21997e+06	858135	1.17741e+06	-	-	-	not significant
S282	PEAK1_MOUSE	244895	Peak1	0	0	0	1.38308e+06	1.33836e+06	1.36966e+06	-	-	-	not significant
S261	FNIP1_MOUSE	216742	Fnip1	0	0	0	615942	879023	769933	-	-	-	not significant
T238	CLH1_MOUSE	67300	Cltc	0	0	0	706559	682087	877668	-	-	-	not significant
S454	CR1L_MOUSE	12946	Cr1l	0	0	0	9.32378e+06	9.95071e+06	9.18244e+06	-	-	-	not significant
S350	RBL1_MOUSE	19650	Rbl1	0	0	0	1.36357e+06	1.65486e+06	1.624e+06	-	-	-	not significant
S1036	RBL1_MOUSE	19650	Rbl1	0	0	0	5.212e+06	5.21909e+06	5.94036e+06	-	-	-	not significant
S1439	TOP2B_MOUSE	21974	Top2b	0	0	0	1.04374e+06	1.13854e+06	716110	-	-	-	not significant
S270	ATP7A_MOUSE	11977	Atp7a	0	0	0	3851657	2.61842e+06	3.83278e+06	-	-	-	not significant
S275	SQSTM_MOUSE	18412	Sqstm1	0	0	0	2.66414e+06	2.89995e+06	2.1721e+06	-	-	-	not significant
S357	SQSTM_MOUSE	18412	Sqstm1	0	0	0	4598933	4.66643e+06	4.94782e+06	-	-	-	not significant
S363	SQSTM_MOUSE	18412	Sqstm1	0	0	0	4598933	4.66643e+06	4.94782e+06	-	-	-	not significant
S249	SQSTM_MOUSE	18412	Sqstm1	0	0	0	1.07369e+06	663431	734718	-	-	-	not significant
T565	UT14A_MOUSE	72554	Utp14a	0	0	0	1.89204e+06	1.33464e+06	1.5616e+06	-	-	-	not significant
S531	UT14A_MOUSE	72554	Utp14a	0	0	0	5286739	5.71726e+06	5.73985e+06	-	-	-	not significant
S1397	MINT_MOUSE	56381	Spen	0	0	0	1.02744e+06	881587	1.31277e+06	-	-	-	not significant
S2128	MINT_MOUSE	56381	Spen	0	0	0	5976245	4.45442e+06	4.53255e+06	-	-	-	not significant
S394	IF4G2_MOUSE	13690	Eif4g2	0	0	0	2.75166e+06	1.78074e+06	1.62149e+06	-	-	-	not significant
S100	FKBP3_MOUSE	30795	Fkbp3	0	0	0	6.09562e+06	4.47437e+06	5.93341e+06	-	-	-	not significant
T328	NDRG1_MOUSE	17988	Ndrg1	0	0	0	9347521	8.97463e+06	8.72986e+06	-	-	-	not significant
S277	DBNL_MOUSE	13169	Dbnl	0	0	0	4550146	3.99875e+06	4.20908e+06	-	-	-	not significant
T1523	SPT6H_MOUSE	20926	Supt6h	0	0	0	2.23029e+06	2.2125e+06	2.43099e+06	-	-	-	not significant
S489	TIF1B_MOUSE	21849	Trim28	0	0	0	2.79649e+07	2.82071e+07	2.7903e+07	-	-	-	not significant
S2102	SPTB2_MOUSE	20742	Sptbn1	0	0	0	8.82833e+06	9.88397e+06	8.3496e+06	-	-	-	not significant
S191	SRSF2_MOUSE	20382	Srsf2	0	0	0	796785	817493	880277	-	-	-	not significant
S1037	CTR9_MOUSE	22083	Ctr9	0	0	0	6807157	5.00231e+06	4.68792e+06	-	-	-	not significant
S1039	CTR9_MOUSE	22083	Ctr9	0	0	0	6807157	5.00231e+06	4.68792e+06	-	-	-	not significant
S1041	CTR9_MOUSE	22083	Ctr9	0	0	0	6807157	5.00231e+06	4.68792e+06	-	-	-	not significant
S970	CTR9_MOUSE	22083	Ctr9	0	0	0	1.02969e+08	9.7991e+07	8.05189e+07	-	-	-	not significant
S490	MELK_MOUSE	17279	Melk	0	0	0	1.78141e+06	1.42329e+06	1.29013e+06	-	-	-	not significant
S94	PDCD4_MOUSE	18569	Pdcd4	0	0	0	27008606	2.12424e+07	1.80076e+07	-	-	-	not significant
S681	KIF3B_MOUSE	16569	Kif3b	0	0	0	1.26924e+06	1.04725e+06	1.165e+06	-	-	-	not significant
S510	HS105_MOUSE	15505	Hsph1	0	0	0	6.04127e+06	7.1187e+06	6.73258e+06	-	-	-	not significant
S93	CBX5_MOUSE	12419	Cbx5	0	0	0	7.03802e+06	4.33022e+06	5.39088e+06	-	-	-	not significant
S687	GPAT1_MOUSE	14732	Gpam	0	0	0	1.04845e+06	838086	1.04523e+06	-	-	-	not significant
S694	GPAT1_MOUSE	14732	Gpam	0	0	0	1.04845e+06	838086	1.04523e+06	-	-	-	not significant
S386	MK06_MOUSE	50772	Mapk6	0	0	0	2.06624e+06	2.3191e+06	1.86364e+06	-	-	-	not significant
S79	HTF4_MOUSE	21406	Tcf12	0	0	0	2.39887e+06	2.36407e+06	2.69174e+06	-	-	-	not significant
S202	SNTB2_MOUSE	20650	Sntb2	0	0	0	2.71801e+06	1.65258e+06	2.97152e+06	-	-	-	not significant
S88	SNTB2_MOUSE	20650	Sntb2	0	0	0	11249798	8.48584e+06	7.60982e+06	-	-	-	not significant
S124	P3C2A_MOUSE	18704	Pik3c2a	0	0	0	714478	410098	863901	-	-	-	not significant
S150	CTCF_MOUSE	13018	Ctcf	0	0	0	643179	638339	821660	-	-	-	not significant
S427	PRP4B_MOUSE	19134	Prpf4b	0	0	0	5.6821e+06	5.39621e+06	6.1623e+06	-	-	-	not significant
S437	PRP4B_MOUSE	19134	Prpf4b	0	0	0	5.6821e+06	5.39621e+06	6.1623e+06	-	-	-	not significant
S6	NAB2_MOUSE	17937	Nab2	0	0	0	14206382	1.2336e+07	1.00579e+07	-	-	-	not significant
S21	CLN3_MOUSE	12752	Cln3	0	0	0	1.41625e+06	1.60104e+06	1.57001e+06	-	-	-	not significant
T207	LAP2B_MOUSE	21917	Tmpo	0	0	0	5.84174e+06	1.13248e+07	9.839e+06	-	-	-	not significant
S514	PML_MOUSE	18854	Pml	0	0	0	5.29182e+06	6.28901e+06	3.85729e+06	-	-	-	not significant
S375	EP15R_MOUSE	13859	Eps15l1	0	0	0	1855266	1.9318e+06	2.24162e+06	-	-	-	not significant
S323	STXB3_MOUSE	20912	Stxbp3	0	0	0	915009	852950	895548	-	-	-	not significant
S865	SETD5_MOUSE	72895	Setd5	0	0	0	1.34369e+06	989435	1.16164e+06	-	-	-	not significant
S631	LEO1_MOUSE	235497	Leo1	0	0	0	2.26263e+06	3.76698e+06	2.93598e+06	-	-	-	not significant
S912	SFR19_MOUSE	233208	Scaf1	0	0	0	4788367	4.60621e+06	3.8449e+06	-	-	-	not significant
Y134	CC157_MOUSE	216516	Ccdc157	0	0	0	6.85671e+06	6.22793e+06	6.54193e+06	-	-	-	not significant
T586	PHF12_MOUSE	268448	Phf12	0	0	0	771377	736737	743952	-	-	-	not significant
S120	RBM27_MOUSE	225432	Rbm27	0	0	0	921450	1.55316e+06	1.13074e+06	-	-	-	not significant
S2349	Q5RIM6_MOUSE	20185	Ncor1	0	0	0	2.39156e+06	1.73219e+06	1.85723e+06	-	-	-	not significant
S2351	Q5RIM6_MOUSE	20185	Ncor1	0	0	0	4.88321e+06	1.73219e+06	4.19296e+06	-	-	-	not significant
S2099	Q5RIM6_MOUSE	20185	Ncor1	0	0	0	5.95169e+06	7.20987e+06	3.47041e+06	-	-	-	not significant
S1208	Q5RIM6_MOUSE	20185	Ncor1	0	0	0	8334034	6.76131e+06	5.66545e+06	-	-	-	not significant
S27	NSRP1_MOUSE	237859	Nsrp1	0	0	0	2.87178e+06	1.81321e+06	2.70993e+06	-	-	-	not significant
S51	RHG01_MOUSE	228359	Arhgap1	0	0	0	2.82178e+06	2.35163e+06	2.35822e+06	-	-	-	not significant
T313	ARHGF_MOUSE	442801	Arhgef15	0	0	0	12757756	1.17554e+07	8.3965e+06	-	-	-	not significant
S9	TAOK1_MOUSE	216965	Taok1	0	0	0	2.21608e+06	2.25646e+06	2.17418e+06	-	-	-	not significant
S100	ZN652_MOUSE	268469	Znf652	0	0	0	5095839	5.64403e+06	5.40006e+06	-	-	-	not significant
T103	ZN652_MOUSE	268469	Znf652	0	0	0	5095839	5.64403e+06	5.40006e+06	-	-	-	not significant
S57	TUT7_MOUSE	214290	Tut7	0	0	0	1.0988e+06	1.38368e+06	1.77238e+06	-	-	-	not significant
S705	JIP4_MOUSE	70834	Spag9	0	0	0	449663	468077	671491	-	-	-	not significant
S485	GPKOW_MOUSE	209416	Gpkow	0	0	0	1.21522e+06	1.21548e+06	1.4131e+06	-	-	-	not significant
S348	GPKOW_MOUSE	209416	Gpkow	0	0	0	6674040	8.7273e+06	7.95277e+06	-	-	-	not significant
S55	TR150_MOUSE	230753	Thrap3	0	0	0	737455	1.10188e+06	989174	-	-	-	not significant
S1166	PDS5B_MOUSE	100710	Pds5b	0	0	0	2.16588e+07	1.97858e+07	1.88709e+07	-	-	-	not significant
S1381	PDS5B_MOUSE	100710	Pds5b	0	0	0	933951	1.68648e+06	1.43466e+06	-	-	-	not significant
S740	ARAP1_MOUSE	69710	Arap1	0	0	0	704001	909320	914334	-	-	-	not significant
S614	LRRF1_MOUSE	16978	Lrrfip1	0	0	0	2.1854e+06	2.47965e+06	2.18676e+06	-	-	-	not significant
S1111	KDM5A_MOUSE	214899	Kdm5a	0	0	0	1.44686e+06	1.43505e+06	1.39146e+06	-	-	-	not significant
S389	Q3UXQ3_MOUSE	21406	Tcf12	0	0	0	1.16452e+07	1.40172e+07	8.3711e+06	-	-	-	not significant
S357	Q3UWE6_MOUSE	69641	Wdr20	0	0	0	13598296	1.27512e+07	1.2262e+07	-	-	-	not significant
S507	FCHO2_MOUSE	218503	Fcho2	0	0	0	1.48444e+06	1.68331e+06	1.54793e+06	-	-	-	not significant
T361	SC31A_MOUSE	69162	Sec31a	0	0	0	1.28159e+06	1.38156e+06	1.88111e+06	-	-	-	not significant
S805	ZCCHV_MOUSE	78781	Zc3hav1	0	0	0	1.03166e+06	2.24269e+06	1.65771e+06	-	-	-	not significant
S272	SKAP2_MOUSE	54353	Skap2	0	0	0	3.77289e+06	3.93683e+06	3.96276e+06	-	-	-	not significant
S659	HDGR2_MOUSE	15193	Hdgfl2	0	0	0	10473000	1.03698e+07	8.71044e+06	-	-	-	not significant
S661	HDGR2_MOUSE	15193	Hdgfl2	0	0	0	10473000	1.03698e+07	8.71044e+06	-	-	-	not significant
S762	Q3ULG5_MOUSE	17219	Mcm6	0	0	0	2.36482e+06	2.13606e+06	2.34792e+06	-	-	-	not significant
S888	Q3ULB0_MOUSE	19654	Rbm6	0	0	0	8640534	7.71839e+06	6.26811e+06	-	-	-	not significant
S756	Q3ULB0_MOUSE	19654	Rbm6	0	0	0	780174	1.68239e+06	1.65646e+06	-	-	-	not significant
S501	ELL2_MOUSE	192657	Ell2	0	0	0	4.54062e+06	2.87661e+06	2.54949e+06	-	-	-	not significant
S83	RMD3_MOUSE	67809	Rmdn3	0	0	0	3.18961e+06	2.24517e+06	2.54763e+06	-	-	-	not significant
S302	Q3UID0_MOUSE	68094	Smarcc2	0	0	0	1.87903e+07	2.53605e+06	6.61635e+06	-	-	-	not significant
S304	Q3UID0_MOUSE	68094	Smarcc2	0	0	0	1.87903e+07	2.53605e+06	6.61635e+06	-	-	-	not significant
S870	NOL8_MOUSE	70930	Nol8	0	0	0	5845226	6.04092e+06	4.89625e+06	-	-	-	not significant
S872	NOL8_MOUSE	70930	Nol8	0	0	0	5845226	6.04092e+06	4.89625e+06	-	-	-	not significant
S364	NOL8_MOUSE	70930	Nol8	0	0	0	2.02612e+06	2.1016e+06	2.38905e+06	-	-	-	not significant
S365	NOL8_MOUSE	70930	Nol8	0	0	0	2.02612e+06	2.1016e+06	2.38905e+06	-	-	-	not significant
S844	AAK1_MOUSE	269774	Aak1	0	0	0	2.10388e+06	4.57003e+06	4.57111e+06	-	-	-	not significant
S374	Q3UH85_MOUSE	329540	Nol4l	0	0	0	1.48995e+06	1.51145e+06	1.64346e+06	-	-	-	not significant
S1449	KMT2E_MOUSE	69188	Kmt2e	0	0	0	4.19728e+06	5.60671e+06	1.40693e+06	-	-	-	not significant
S1364	KMT2E_MOUSE	69188	Kmt2e	0	0	0	4.77353e+06	3.19171e+06	2.75886e+06	-	-	-	not significant
S66	RRP36_MOUSE	224823	Rrp36	0	0	0	4621481	3.50681e+06	3.07599e+06	-	-	-	not significant
S388	Q3UFM6_MOUSE	27886	Ess2	0	0	0	984332	698528	773766	-	-	-	not significant
S39	BCD1_MOUSE	229937	Znhit6	0	0	0	2125906	2.3443e+06	1.88528e+06	-	-	-	not significant
S429	Q3UDC3_MOUSE	21968	Tom1	0	0	0	1.71042e+06	1.23396e+06	1.05923e+06	-	-	-	not significant
S526	FOXK2_MOUSE	68837	Foxk2	0	0	0	523516	497454	630557	-	-	-	not significant
S67	LBR_MOUSE	98386	Lbr	0	0	0	330517	747123	715636	-	-	-	not significant
S71	LBR_MOUSE	98386	Lbr	0	0	0	1.51909e+06	2.76346e+06	2.76149e+06	-	-	-	not significant
S630	KMT5B_MOUSE	225888	Kmt5b	0	0	0	2.0029e+06	2.57598e+06	2.86965e+06	-	-	-	not significant
S826	GSE1_MOUSE	382034	Gse1	0	0	0	1.41091e+07	1.39864e+07	1.26253e+07	-	-	-	not significant
S828	GSE1_MOUSE	382034	Gse1	0	0	0	1.41091e+07	1.39864e+07	1.26253e+07	-	-	-	not significant
S899	GSE1_MOUSE	382034	Gse1	0	0	0	7.60135e+06	4.37293e+06	6.87676e+06	-	-	-	not significant
T227	SC24A_MOUSE	77371	Sec24a	0	0	0	1.04561e+06	1.38923e+06	943895	-	-	-	not significant
T327	RN149_MOUSE	67702	Rnf149	0	0	0	3.0332e+06	2.96106e+06	3.05431e+06	-	-	-	not significant
S379	S38A5_MOUSE	209837	Slc38a5	0	0	0	599390	1.00051e+06	573192	-	-	-	not significant
T502	CRTC2_MOUSE	74343	Crtc2	0	0	0	566079	601895	771597	-	-	-	not significant
S152	TBD2B_MOUSE	67016	Tbc1d2b	0	0	0	739108	385387	638907	-	-	-	not significant
S66	Q3TUQ5_MOUSE	18949	Pnn	0	0	0	4.02919e+06	4.231e+06	3.85986e+06	-	-	-	not significant
S120	Q3TUQ5_MOUSE	18949	Pnn	0	0	0	1.60204e+06	1.43637e+06	1.60801e+06	-	-	-	not significant
S81	SNUT2_MOUSE	28035	Usp39	0	0	0	2807632	3.38675e+06	2.51188e+06	-	-	-	not significant
S20	ML12B_MOUSE	67938	Myl12b	0	0	0	3.34168e+06	4.81527e+06	4.74555e+06	-	-	-	not significant
T51	HP1B3_MOUSE	15441	Hp1bp3	0	0	0	6.19246e+06	9.25643e+06	7.16623e+06	-	-	-	not significant
S506	Q3TE00_MOUSE	94112	Med15	0	0	0	1638374	2.87323e+06	3.55392e+06	-	-	-	not significant
S156	PACER_MOUSE	271221	Rubcnl	0	0	0	8.03781e+06	7.63407e+06	7.85288e+06	-	-	-	not significant
T57	Q2TK27_MOUSE	56017	Slc2a8	0	0	0	3.96848e+06	2.70942e+06	2.45225e+06	-	-	-	not significant
S128	PAR14_MOUSE	547253	Parp14	0	0	0	3.57324e+06	3.66733e+06	3.73966e+06	-	-	-	not significant
S165	CDCA2_MOUSE	108912	Cdca2	0	0	0	4775642	4.92231e+06	3.95734e+06	-	-	-	not significant
S273	CDK12_MOUSE	69131	Cdk12	0	0	0	748108	671758	804894	-	-	-	not significant
S275	CDK12_MOUSE	69131	Cdk12	0	0	0	748108	671758	804894	-	-	-	not significant
S285	CASS4_MOUSE	320664	Cass4	0	0	0	1.4716e+06	1.67508e+06	1.36138e+06	-	-	-	not significant
S865	ECT2_MOUSE	13605	Ect2	0	0	0	4.93141e+06	3.29106e+06	3.10344e+06	-	-	-	not significant
S165	IF2P_MOUSE	226982	Eif5b	0	0	0	1.20535e+06	55903.7	206391	-	-	-	not significant
S79	SMRCD_MOUSE	13990	Smarcad1	0	0	0	2.62292e+06	2.54365e+06	2.69562e+06	-	-	-	not significant
S199	KCRB_MOUSE	12709	Ckb	0	0	0	1.9022e+06	6.60317e+06	4.23729e+06	-	-	-	not significant
S384	IKZF1_MOUSE	22778	Ikzf1	0	0	0	1.96562e+06	2.70555e+06	3.2469e+06	-	-	-	not significant
S267	PDCD1_MOUSE	18566	Pdcd1	0	0	0	32004850	2.89435e+07	2.62014e+07	-	-	-	not significant
S278	G3BP1_MOUSE	27041	G3bp1	0	0	0	514004	819231	745689	-	-	-	not significant
S588	CRY1_MOUSE	12952	Cry1	0	0	0	7963680	8.62848e+06	9.18476e+06	-	-	-	not significant
S138	SMAD4_MOUSE	17128	Smad4	0	0	0	1.0007e+06	796309	941297	-	-	-	not significant
S299	NCF4_MOUSE	17972	Ncf4	0	0	0	1.00983e+06	928729	959992	-	-	-	not significant
S138	SRSF3_MOUSE	20383	Srsf3	0	0	0	3.32818e+06	4.17157e+06	3.76332e+06	-	-	-	not significant
S140	SRSF3_MOUSE	20383	Srsf3	0	0	0	3.32818e+06	4.17157e+06	3.76332e+06	-	-	-	not significant
S108	SRSF3_MOUSE	20383	Srsf3	0	0	0	1.35405e+06	7.6498e+06	5.25502e+06	-	-	-	not significant
T392	PDE7A_MOUSE	18583	Pde7a	0	0	0	4.16398e+06	3.56109e+06	3.68517e+06	-	-	-	not significant
T400	PDE7A_MOUSE	18583	Pde7a	0	0	0	4.16398e+06	3.56109e+06	3.68517e+06	-	-	-	not significant
S1100	ROCK1_MOUSE	19877	Rock1	0	0	0	5.5517e+06	5.13086e+06	5.87965e+06	-	-	-	not significant
T1101	ROCK1_MOUSE	19877	Rock1	0	0	0	5.5517e+06	5.13086e+06	5.87965e+06	-	-	-	not significant
S257	STIM1_MOUSE	20866	Stim1	0	0	0	4.84369e+06	3.5443e+06	1.84712e+06	-	-	-	not significant
S421	PI51B_MOUSE	18719	Pip5k1b	0	0	0	3.75464e+06	5.26231e+06	3.69532e+06	-	-	-	not significant
S412	RANB9_MOUSE	56705	Ranbp9	0	0	0	1.63608e+06	1.90792e+06	1.95265e+06	-	-	-	not significant
T500	KPCB_MOUSE	18751	Prkcb	0	0	0	888703	2.22314e+06	1.283e+06	-	-	-	not significant
S235	RS6_MOUSE	20104; 105244208	Rps6	0	0	0	6.00421e+06	4.78134e+06	5.91097e+06	-	-	-	not significant
S236	RS6_MOUSE	20104; 105244208	Rps6	0	0	0	6.00421e+06	4.78134e+06	5.91097e+06	-	-	-	not significant
T53	PRS4_MOUSE	19179	Psmc1	0	0	0	3.37674e+06	2.67822e+06	2.80545e+06	-	-	-	not significant
S1011	SASH1_MOUSE	70097	Sash1	0	0	0	3274284	3.614e+06	3.38969e+06	-	-	-	not significant
S805	SASH1_MOUSE	70097	Sash1	0	0	0	1.04121e+06	972646	1.30453e+06	-	-	-	not significant
S182	YTHD1_MOUSE	228994	Ythdf1	0	0	0	660606	748212	722172	-	-	-	not significant
S387	B2L13_MOUSE	94044	Bcl2l13	0	0	0	1.89525e+06	3.02588e+06	2.17447e+06	-	-	-	not significant
T533	TB182_MOUSE	228140	Tnks1bp1	0	0	0	2.234e+06	2.26861e+06	2.35727e+06	-	-	-	not significant
S692	TB182_MOUSE	228140	Tnks1bp1	0	0	0	1.19358e+06	1.39666e+06	1.28026e+06	-	-	-	not significant
S513	GCP3_MOUSE	259279	Tubgcp3	0	0	0	841595	868823	933074	-	-	-	not significant
S411	RIPK2_MOUSE	192656	Ripk2	0	0	0	867886	1.92138e+06	1.68688e+06	-	-	-	not significant
S82	BBLN_MOUSE	73737	Bbln	0	0	0	981576	936456	835258	-	-	-	not significant
S223	KLF16_MOUSE	118445	Klf16	0	0	0	1.97023e+06	1.50821e+06	2.10692e+06	-	-	-	not significant
S23	SAMN1_MOUSE	67742	Samsn1	0	0	0	5155913	4.92225e+06	4.49866e+06	-	-	-	not significant
T319	RRP1_MOUSE	18114	Rrp1	0	0	0	1.31246e+06	1.57805e+06	1.20333e+06	-	-	-	not significant
S2123	KMT2A_MOUSE	214162	Kmt2a	0	0	0	5006809	2.32716e+06	4.73357e+06	-	-	-	not significant
T280	M3K1_MOUSE	26401	Map3k1	0	0	0	505187	622663	665519	-	-	-	not significant
S913	M3K1_MOUSE	26401	Map3k1	0	0	0	1.88509e+06	1.75327e+06	1.86853e+06	-	-	-	not significant
S71	M3K1_MOUSE	26401	Map3k1	0	0	0	805547	2.53833e+06	1.07765e+06	-	-	-	not significant
S101	HMGA2_MOUSE	15364	Hmga2	0	0	0	1.76201e+06	1.2477e+06	1.53927e+06	-	-	-	not significant
S44	HMGA2_MOUSE	15364	Hmga2	0	0	0	6.76586e+06	9.34266e+06	8.37602e+06	-	-	-	not significant
S55	DHB8_MOUSE	14979	Hsd17b8	0	0	0	1.38707e+06	940700	847433	-	-	-	not significant
S319	PCY1A_MOUSE	13026	Pcyt1a	0	0	0	11382304	1.02699e+07	1.26043e+07	-	-	-	not significant
S347	PCY1A_MOUSE	13026	Pcyt1a	0	0	0	10352890	9.63343e+06	9.76521e+06	-	-	-	not significant
S95	ROA1_MOUSE	15382	Hnrnpa1	0	0	0	1.50769e+06	2.29767e+06	1.5244e+06	-	-	-	not significant
S396	MYBB_MOUSE	17865	Mybl2	0	0	0	3.08624e+06	2.68989e+06	2.96305e+06	-	-	-	not significant
S706	BRCA1_MOUSE	12189	Brca1	0	0	0	4.08576e+06	3.31652e+06	3.52699e+06	-	-	-	not significant
S66	LMNA_MOUSE	16905	Lmna	0	0	0	3137392	3.302e+06	2.70643e+06	-	-	-	not significant
S533	LMNA_MOUSE	16905	Lmna	0	0	0	2.77401e+06	2.25527e+06	3.15461e+06	-	-	-	not significant
S404	LMNA_MOUSE	16905	Lmna	0	0	0	1.08649e+07	463586	740416	-	-	-	not significant
S277	LMNA_MOUSE	16905	Lmna	0	0	0	1.79242e+06	2.46928e+06	2.60849e+06	-	-	-	not significant
S270	KSYK_MOUSE	20963	Syk	0	0	0	7.83082e+06	6.86818e+06	8.02985e+06	-	-	-	not significant
S83	FOSL2_MOUSE	14284	Fosl2	0	0	0	3.03615e+06	3.21034e+06	3.67544e+06	-	-	-	not significant
S120	FOSL2_MOUSE	14284	Fosl2	0	0	0	3.00842e+06	2.45752e+06	2.41288e+06	-	-	-	not significant
T190	WEE1_MOUSE	22390	Wee1	0	0	0	790364	829087	1.08318e+06	-	-	-	not significant
S739	NSF_MOUSE	18195	Nsf	0	0	0	1052362	1.12753e+06	988964	-	-	-	not significant
S430	RAGP1_MOUSE	19387	Rangap1	0	0	0	810455	839532	950811	-	-	-	not significant
T186	PURA_MOUSE	19290	Pura	0	0	0	702007	1.10054e+06	1.00724e+06	-	-	-	not significant
S7	VHL_MOUSE	22346	Vhl	0	0	0	2.46784e+06	2.64755e+06	2.71823e+06	-	-	-	not significant
S1619	CHD1_MOUSE	12648	Chd1	0	0	0	2060485	4.36992e+06	4.07384e+06	-	-	-	not significant
S294	CAP1_MOUSE	12331	Cap1	0	0	0	931142	719217	756648	-	-	-	not significant
S300	CAP1_MOUSE	12331	Cap1	0	0	0	931142	719217	756648	-	-	-	not significant
T314	CAP1_MOUSE	12331	Cap1	0	0	0	931142	719217	756648	-	-	-	not significant
S162	GRP75_MOUSE	15526	Hspa9	0	0	0	865168	1.05191e+06	901491	-	-	-	not significant
S13	KCNJ2_MOUSE	16518	Kcnj2	0	0	0	977389	987077	1.00899e+06	-	-	-	not significant
S390	FAK1_MOUSE	14083	Ptk2	0	0	0	1.60518e+06	937804	1.54493e+06	-	-	-	not significant
S212	MP2K1_MOUSE	26395	Map2k1	0	0	0	1.75752e+06	2.00448e+06	2.60581e+06	-	-	-	not significant
Y29	ACBP_MOUSE	13167	Dbi	0	0	0	340392	315814	382153	-	-	-	not significant
S1195	NKTR_MOUSE	18087	Nktr	0	0	0	8981757	9.60759e+06	8.93859e+06	-	-	-	not significant
S250	PTN6_MOUSE	15170	Ptpn6	0	0	0	627055	707484	824422	-	-	-	not significant
S18	APEX1_MOUSE	11792	Apex1	0	0	0	429241	1.24016e+06	1.72975e+06	-	-	-	not significant
S128	DHE3_MOUSE	14661	Glud1	0	0	0	512796	365807	433772	-	-	-	not significant
S281	RS2_MOUSE	16898	Rps2	0	0	0	9.79639e+06	1.00008e+07	1.14068e+07	-	-	-	not significant
S163	MDM2_MOUSE	17246	Mdm2	0	0	0	4836759	6.10744e+06	6.78221e+06	-	-	-	not significant
S183	MDM2_MOUSE	17246	Mdm2	0	0	0	3.06198e+06	3.05595e+06	3.25088e+06	-	-	-	not significant
S255	CXA1_MOUSE	14609	Gja1	0	0	0	3.03315e+06	3.83708e+06	3.40728e+06	-	-	-	not significant
S797	CBL_MOUSE	12402	Cbl	0	0	0	3.84392e+06	1.55383e+06	1.00187e+06	-	-	-	not significant
T417	VIME_MOUSE	22352	Vim	0	0	0	372949	258735	549652	-	-	-	not significant
S72	VIME_MOUSE	22352	Vim	0	0	0	32382328	2.57141e+07	2.26808e+07	-	-	-	not significant
T25	COF1_MOUSE	12631	Cfl1	0	0	0	825803	1.4045e+06	1.07974e+06	-	-	-	not significant
S41	COF1_MOUSE	12631	Cfl1	0	0	0	3326954	3.04889e+06	3.19633e+06	-	-	-	not significant
S242	HMOX1_MOUSE	15368	Hmox1	0	0	0	2.39512e+06	2.78658e+06	3.54331e+06	-	-	-	not significant
S46	S10A6_MOUSE	20200	S100a6	0	0	0	686088	645366	750416	-	-	-	not significant
S261	HS90B_MOUSE	15516	Hsp90ab1	0	0	0	8.82942e+06	7.07258e+06	8.48787e+06	-	-	-	not significant
S58	4F2_MOUSE	17254	Slc3a2	0	0	0	2.57256e+06	2.50839e+06	2.07234e+06	-	-	-	not significant
S93	SURF2_MOUSE	20931	Surf2	0	0	0	3.4639e+06	1.59629e+06	3.48451e+06	-	-	-	not significant
T61	MDHM_MOUSE	17448	Mdh2	0	0	0	1.10066e+06	1.23229e+06	1.30128e+06	-	-	-	not significant
S347	HA1D_MOUSE	110557	H2-K1	0	0	0	1.36338e+06	1.22213e+06	1.07521e+06	-	-	-	not significant
S293	MYC_MOUSE	17869	Myc	0	0	0	2.43284e+06	2.13318e+06	1.90072e+06	-	-	-	not significant
S133	FOS_MOUSE	14281	Fos	0	0	0	1.3417e+06	1.35689e+06	1.37851e+06	-	-	-	not significant
S333	PDE4A_MOUSE	18577	Pde4a	0	0	0	3.11904e+06	3.00448e+06	3.28287e+06	-	-	-	not significant
S297	PDE4A_MOUSE	18577	Pde4a	0	0	0	3.37222e+06	2.50245e+06	2.51553e+06	-	-	-	not significant
S187	AKA10_MOUSE	56697	Akap10	0	0	0	4.86462e+06	5.85614e+06	5.70505e+06	-	-	-	not significant
S259	ROA2_MOUSE	53379	Hnrnpa2b1	0	0	0	1.97507e+06	1.62613e+06	1.85608e+06	-	-	-	not significant
S212	ROA2_MOUSE	53379	Hnrnpa2b1	0	0	0	3.2604e+06	3.33089e+06	4.17937e+06	-	-	-	not significant
S697	IKKB_MOUSE	16150	Ikbkb	0	0	0	2.28894e+06	2.56985e+06	2.69061e+06	-	-	-	not significant
S1374	TM131_MOUSE	56030	Tmem131	0	0	0	3.69342e+06	3.86659e+06	1.53669e+06	-	-	-	not significant
S492	E41L2_MOUSE	13822	Epb41l2	0	0	0	12689214	1.24427e+07	1.01994e+07	-	-	-	not significant
S593	ATX2_MOUSE	20239	Atxn2	0	0	0	8.14273e+06	5.65826e+06	6.10929e+06	-	-	-	not significant
S36	SPT5H_MOUSE	20924	Supt5h	0	0	0	1.16161e+07	9.46046e+06	1.08401e+07	-	-	-	not significant
S261	NUDC_MOUSE	18221	Nudc	0	0	0	2007976	2.16514e+06	2.23639e+06	-	-	-	not significant
S46	FYB1_MOUSE	23880	Fyb1	0	0	0	2.35495e+06	2.88116e+06	2.93008e+06	-	-	-	not significant
S2082	NOTC2_MOUSE	18129	Notch2	0	0	0	360836	525315	480443	-	-	-	not significant
S24	CDK14_MOUSE	18647	Cdk14	0	0	0	5.0027e+06	4.64645e+06	4.28303e+06	-	-	-	not significant
S281	CLK3_MOUSE	102414	Clk3	0	0	0	7438786	1.04041e+07	9.09527e+06	-	-	-	not significant
S283	CLK3_MOUSE	102414	Clk3	0	0	0	7438786	1.04041e+07	9.09527e+06	-	-	-	not significant
S310	PURB_MOUSE	19291	Purb	0	0	0	11088974	1.01654e+07	1.00298e+07	-	-	-	not significant
S1049	WRN_MOUSE	22427	Wrn	0	0	0	3.23618e+06	2.59667e+06	3.44868e+06	-	-	-	not significant
S452	C3AR_MOUSE	12267	C3ar1	0	0	0	3.01136e+06	3.11269e+06	3.03357e+06	-	-	-	not significant
S1216	TCOF_MOUSE	21453	Tcof1	0	0	0	1.71826e+06	1.37913e+06	1.93134e+06	-	-	-	not significant
S353	NFIL3_MOUSE	18030	Nfil3	0	0	0	2.6132e+06	2.24981e+06	2.45124e+06	-	-	-	not significant
S237	THOC4_MOUSE	21681	Alyref	0	0	0	1.28195e+06	914908	1.12167e+06	-	-	-	not significant
S866	KMT2B_MOUSE	75410	Kmt2b	0	0	0	7798322	7.53792e+06	6.82509e+06	-	-	-	not significant
S117	K3W4P1_MOUSE	17966	Nbr1	0	0	0	971500	1.32958e+06	2.4184e+06	-	-	-	not significant
S62	J3QPR1_MOUSE	20238	Atxn1	0	0	0	6.91747e+06	7.98484e+06	6.84724e+06	-	-	-	not significant
S68	J3QNW0_MOUSE	13433	Dnmt1	0	0	0	8.8737e+06	8.92378e+06	7.7258e+06	-	-	-	not significant
S413	J3QNU6_MOUSE	109689	Arrb1	0	0	0	5.21601e+07	3.64231e+07	3.53214e+07	-	-	-	not significant
S274	J3QNK5_MOUSE	269003	Sap130	0	0	0	4133861	3.53837e+06	4.14326e+06	-	-	-	not significant
S682	J3QK52_MOUSE	57741	Noc2l	0	0	0	1.59084e+06	304953	204919	-	-	-	not significant
S2027	H9KV15_MOUSE	20658	Son	0	0	0	3.08782e+06	2.89206e+06	3.21715e+06	-	-	-	not significant
S2029	H9KV15_MOUSE	20658	Son	0	0	0	3.08782e+06	2.89206e+06	3.21715e+06	-	-	-	not significant
S2031	H9KV15_MOUSE	20658	Son	0	0	0	3.08782e+06	2.89206e+06	3.21715e+06	-	-	-	not significant
T2181	H9KV15_MOUSE	20658	Son	0	0	0	777358	891691	737890	-	-	-	not significant
T38	H9H9S3_MOUSE	24136	Zeb2	0	0	0	1.85767e+06	2.52616e+06	2.92261e+06	-	-	-	not significant
S1202	H9H9S3_MOUSE	24136	Zeb2	0	0	0	3420226	3.34941e+06	3.15631e+06	-	-	-	not significant
S1166	H9H9S3_MOUSE	24136	Zeb2	0	0	0	502386	422890	586012	-	-	-	not significant
S853	H7BX08_MOUSE	67886	Camsap2	0	0	0	2.1727e+06	1.95064e+06	1.66061e+06	-	-	-	not significant
T367	H3BKD9_MOUSE	77980	Sbf1	0	0	0	524789	489737	426737	-	-	-	not significant
S567	H3BK48_MOUSE	338320	Mia2	0	0	0	4841355	4.11571e+06	4.58884e+06	-	-	-	not significant
S395	H3BJH7_MOUSE	216549	Aftph	0	0	0	6.74671e+06	6.86278e+06	5.71785e+06	-	-	-	not significant
S2098	G5E8Q0_MOUSE	17101	Lyst	0	0	0	2046121	4.25131e+06	4.04862e+06	-	-	-	not significant
S715	G5E8I8_MOUSE	27967	Cherp	0	0	0	1.21263e+06	1.20978e+06	932902	-	-	-	not significant
S1178	AT2B1_MOUSE	67972	Atp2b1	0	0	0	297992	227611	375700	-	-	-	not significant
S1182	AT2B1_MOUSE	67972	Atp2b1	0	0	0	297992	227611	375700	-	-	-	not significant
S338	AT2B1_MOUSE	67972	Atp2b1	0	0	0	2067406	1.94162e+06	1.53279e+06	-	-	-	not significant
S1518	G3X9Z4_MOUSE	74737	Pcf11	0	0	0	2.95264e+06	2.51377e+06	2.8339e+06	-	-	-	not significant
S717	G3X9Q6_MOUSE	207214	Larp4	0	0	0	1.94329e+06	1.35332e+06	1.43793e+06	-	-	-	not significant
S243	BIG1_MOUSE	211673	Arfgef1	0	0	0	1.71766e+06	1.75867e+06	2.68829e+06	-	-	-	not significant
S1854	G3X9H5_MOUSE	15194	Htt	0	0	0	3.12999e+06	3.65906e+06	3.3042e+06	-	-	-	not significant
S547	G3X9A3_MOUSE	114565	Zbtb21	0	0	0	1.12546e+06	1.17177e+06	1.15102e+06	-	-	-	not significant
S64	G3X8T2_MOUSE	76014	Zc3h18	0	0	0	944097	3.95953e+06	4.05722e+06	-	-	-	not significant
S912	G3X8T2_MOUSE	76014	Zc3h18	0	0	0	6376223	1.04006e+07	9.98306e+06	-	-	-	not significant
S507	G3X8T2_MOUSE	76014	Zc3h18	0	0	0	865617	1.33149e+06	1.36357e+06	-	-	-	not significant
S1439	G3X8Q1_MOUSE	104248	Cabin1	0	0	0	1.62031e+06	1.34556e+06	1.5363e+06	-	-	-	not significant
S237	G3UYR9_MOUSE	227331	Gigyf2	0	0	0	1.37055e+06	1.10207e+06	1.05705e+06	-	-	-	not significant
T1410	G3UWZ0_MOUSE	217578	Baz1a	0	0	0	9.78055e+06	9.2487e+06	9.22107e+06	-	-	-	not significant
S8	G3UW57_MOUSE	74998	Rab11fip2	0	0	0	1193454	1.5031e+06	1.32408e+06	-	-	-	not significant
S229	F8WIP8_MOUSE	20750	Spp1	0	0	0	3596899	3.97375e+06	4.44004e+06	-	-	-	not significant
S210	F8WIP8_MOUSE	20750	Spp1	0	0	0	7.93529e+06	6.41753e+06	5.025e+06	-	-	-	not significant
S163	F8WIP8_MOUSE	20750	Spp1	0	0	0	5.50316e+06	3.12421e+06	6.61325e+06	-	-	-	not significant
S157	F8WIP8_MOUSE	20750	Spp1	0	0	0	9782349	1.12675e+07	1.68878e+06	-	-	-	not significant
S200	F8WIP7_MOUSE	19708	Dpf2	0	0	0	6331659	5.77251e+06	5.61615e+06	-	-	-	not significant
T204	F8WIP7_MOUSE	19708	Dpf2	0	0	0	6331659	5.77251e+06	5.61615e+06	-	-	-	not significant
S555	F8WHT3_MOUSE	227723	Prrc2b	0	0	0	607465	862176	850057	-	-	-	not significant
S562	F8WHT3_MOUSE	227723	Prrc2b	0	0	0	607465	862176	850057	-	-	-	not significant
S1965	F8WGX5_MOUSE	240283	Dmxl1	0	0	0	1.25766e+06	1.2596e+06	1.22315e+06	-	-	-	not significant
S194	F8WGT2_MOUSE	72649	Tmem209	0	0	0	427212	583353	577488	-	-	-	not significant
S1198	F8VQE2_MOUSE	16565	Kif21b	0	0	0	6.50364e+06	5.63314e+06	5.21503e+06	-	-	-	not significant
S81	F8VQC9_MOUSE	218756	Slc4a7	0	0	0	16765044	1.51956e+07	1.29719e+07	-	-	-	not significant
S89	F8VQC9_MOUSE	218756	Slc4a7	0	0	0	65819620	4.07891e+07	4.50795e+07	-	-	-	not significant
S482	ERCC6_MOUSE	319955	Ercc6	0	0	0	952215	584447	957901	-	-	-	not significant
S485	ERCC6_MOUSE	319955	Ercc6	0	0	0	952215	584447	957901	-	-	-	not significant
S322	F8VPJ6_MOUSE	319758	Rfx7	0	0	0	2.73487e+06	6.57442e+06	3.10564e+06	-	-	-	not significant
S396	F7BTZ2_MOUSE	56188	Pml	0	0	0	4460369	3.95371e+06	4.56613e+06	-	-	-	not significant
S748	F6Z595_MOUSE	245007	Zbtb38	0	0	0	676977	937630	926106	-	-	-	not significant
S626	F6Z595_MOUSE	245007	Zbtb38	0	0	0	1.70625e+06	1.33239e+07	1.39538e+06	-	-	-	not significant
S83	F6XSD0_MOUSE	24086	Tlk2	0	0	0	1.83114e+06	2.11194e+06	1.96039e+06	-	-	-	not significant
S226	F6WXQ4_MOUSE	78808	Stxbp5	0	0	0	2.8411e+06	2.97961e+06	911040	-	-	-	not significant
S335	F6WBP9_MOUSE	116873	Stim2	0	0	0	4985225	5.48849e+06	5.17037e+06	-	-	-	not significant
T47	F6V294_MOUSE	70351	Ppp4r1	0	0	0	3444148	3.12672e+06	3.15384e+06	-	-	-	not significant
S184	F6RND9_MOUSE	26936	Mprip	0	0	0	2.09003e+06	2.28212e+06	2.11445e+06	-	-	-	not significant
S471	F6RND9_MOUSE	26936	Mprip	0	0	0	1294145	782267	627276	-	-	-	not significant
S695	F6R6F1_MOUSE	19707	Reps1	0	0	0	989555	1.10237e+06	1.0549e+06	-	-	-	not significant
S107	F6QX94_MOUSE	22697	Zscan21	0	0	0	11020683	1.14437e+07	1.10498e+07	-	-	-	not significant
S113	F6QX94_MOUSE	22697	Zscan21	0	0	0	11020683	1.14437e+07	1.10498e+07	-	-	-	not significant
S114	F6QX94_MOUSE	22697	Zscan21	0	0	0	11020683	1.14437e+07	1.10498e+07	-	-	-	not significant
S148	F6QFD1_MOUSE	238871	Pde4d	0	0	0	2.78084e+06	2.34093e+06	2.05762e+06	-	-	-	not significant
S40	F6Q8U1_MOUSE	109241	Mbd5	0	0	0	1.0103e+06	878042	780809	-	-	-	not significant
T340	F6Q3G7_MOUSE	326622	Upf2	0	0	0	1.08939e+06	1.20444e+06	1.08848e+06	-	-	-	not significant
S28	E9QP59_MOUSE	380664	Lemd3	0	0	0	1214947	1.07584e+06	770075	-	-	-	not significant
T448	E9QP49_MOUSE	114601	Ehbp1l1	0	0	0	904935	1.36672e+06	808946	-	-	-	not significant
S1132	E9QP19_MOUSE	94093	Trim33	0	0	0	1.27284e+07	1.18863e+07	1.3957e+06	-	-	-	not significant
S343	E9QNR5_MOUSE	330267	Thsd7a	0	0	0	1.19506e+06	1.41863e+06	1.40341e+06	-	-	-	not significant
S244	E9QLS6_MOUSE	225326	Pik3c3	0	0	0	1.22189e+06	1.81959e+06	1.53854e+06	-	-	-	not significant
S1384	SC16A_MOUSE	227648	Sec16a	0	0	0	1.93674e+06	1.65457e+06	1.56065e+06	-	-	-	not significant
S549	E9QAS3_MOUSE	19260	Ptpn22	0	0	0	640126	792634	669117	-	-	-	not significant
S40	E9Q9S2_MOUSE	72140	Cep89	0	0	0	2.51887e+06	1.48702e+06	2.2692e+06	-	-	-	not significant
S44	E9Q9S2_MOUSE	72140	Cep89	0	0	0	2.51887e+06	1.48702e+06	2.2692e+06	-	-	-	not significant
S1204	E9Q9E1_MOUSE	208643	Eif4g1	0	0	0	3.7669e+06	3.09771e+06	4.0108e+06	-	-	-	not significant
S1282	E9Q9C3_MOUSE	17356	Afdn	0	0	0	4.13707e+06	3.07374e+06	7.24641e+06	-	-	-	not significant
S59	SIM13_MOUSE	108934	Smim13	0	0	0	1.33797e+06	1.48525e+06	1.8112e+06	-	-	-	not significant
S61	SIM13_MOUSE	108934	Smim13	0	0	0	1.33797e+06	1.48525e+06	1.8112e+06	-	-	-	not significant
S1282	E9Q8V6_MOUSE	102442	Dennd4a	0	0	0	430909	327820	509781	-	-	-	not significant
S1568	E9Q842_MOUSE	20272	Nav2	0	0	0	4.79964e+06	4.09198e+06	3.81048e+06	-	-	-	not significant
S2039	E9Q804_MOUSE	81702	Ankrd17	0	0	0	826433	1.30143e+06	848731	-	-	-	not significant
S1844	NUMA1_MOUSE	101706	Numa1	0	0	0	8468371	8.56123e+06	7.53364e+06	-	-	-	not significant
S559	E9Q6L0_MOUSE	76707	Clasp1	0	0	0	1.29019e+07	1.18031e+07	1.08247e+07	-	-	-	not significant
S2888	BD1L1_MOUSE	665775	Bod1l	0	0	0	1.39597e+07	1.28245e+07	1.16728e+07	-	-	-	not significant
S1676	BD1L1_MOUSE	665775	Bod1l	0	0	0	1.97072e+06	2.39012e+06	2.24044e+06	-	-	-	not significant
S1243	E9Q6H8_MOUSE	109135	Plekha5	0	0	0	4.01047e+06	2.98373e+06	1.79111e+06	-	-	-	not significant
S19	MYO1E_MOUSE	71602	Myo1e	0	0	0	986010	1.16579e+06	1.02432e+06	-	-	-	not significant
S5620	E9Q616_MOUSE	66395	Ahnak	0	0	0	3.43728e+06	4.2275e+06	3.44766e+06	-	-	-	not significant
S5623	E9Q616_MOUSE	66395	Ahnak	0	0	0	1.01752e+07	9.52458e+06	8.53274e+06	-	-	-	not significant
S3744	E9Q616_MOUSE	66395	Ahnak	0	0	0	911670	870604	551996	-	-	-	not significant
S878	SETD2_MOUSE	235626	Setd2	0	0	0	2.49296e+06	1.20868e+06	1.57594e+06	-	-	-	not significant
S532	SETD2_MOUSE	235626	Setd2	0	0	0	1.47286e+06	1.27771e+06	1.05987e+06	-	-	-	not significant
S430	E9Q5E0_MOUSE	17261	Mef2d	0	0	0	2.18434e+06	3.46438e+06	3.29104e+06	-	-	-	not significant
S1697	E9Q4F8_MOUSE	77087	Ankrd11	0	0	0	2.10225e+06	1.83766e+06	1.81887e+06	-	-	-	not significant
S1067	E9Q3Z5_MOUSE	225115	Svil	0	0	0	1.26293e+06	1.51756e+06	1.3203e+06	-	-	-	not significant
S92	E9Q2M3_MOUSE	214901	Chtf18	0	0	0	2348795	2.68877e+06	1.83232e+06	-	-	-	not significant
S915	E9Q2I4_MOUSE	238317	Mideas	0	0	0	4698367	4.63981e+06	4.35281e+06	-	-	-	not significant
S65	E9Q2I4_MOUSE	238317	Mideas	0	0	0	2.06554e+06	1.67614e+06	647204	-	-	-	not significant
S2277	E9Q1M6_MOUSE	108857	Ankhd1	0	0	0	5.47567e+06	5.25931e+06	5.58818e+06	-	-	-	not significant
T426	E9Q1G8_MOUSE	235072	Septin7	0	0	0	4.07472e+06	3.23156e+06	2.4923e+06	-	-	-	not significant
S72	E9Q0Y4_MOUSE	20469	Sipa1	0	0	0	2.00241e+06	3.15073e+06	2.89634e+06	-	-	-	not significant
S1806	CHD2_MOUSE	244059	Chd2	0	0	0	2820035	2.51388e+06	2.35175e+06	-	-	-	not significant
S685	E9PZD2_MOUSE	231830	Micall2	0	0	0	2289300	8.9927e+06	2.09987e+06	-	-	-	not significant
S127	E9PYZ7_MOUSE	74213	Rbm26	0	0	0	5.39119e+06	7.95005e+06	6.65389e+06	-	-	-	not significant
S113	E9PYW4_MOUSE	70238	Rnf168	0	0	0	3.85122e+06	4.12785e+06	3.52413e+06	-	-	-	not significant
S909	PRR12_MOUSE	233210	Prr12	0	0	0	3.82293e+06	3.86114e+06	3.3255e+06	-	-	-	not significant
S911	PRR12_MOUSE	233210	Prr12	0	0	0	3.82293e+06	3.86114e+06	3.3255e+06	-	-	-	not significant
T1699	PRR12_MOUSE	233210	Prr12	0	0	0	2.16837e+07	2.03263e+07	2.0472e+07	-	-	-	not significant
S1134	E9PY61_MOUSE	217143	Gpr179	0	0	0	1.66181e+06	2.05036e+06	1.50973e+06	-	-	-	not significant
S537	E9PWB1_MOUSE	102693	Phldb1	0	0	0	1.29235e+06	1.21907e+06	670947	-	-	-	not significant
S535	E9PWB1_MOUSE	102693	Phldb1	0	0	0	1.68502e+06	1.38521e+06	1.52609e+06	-	-	-	not significant
S66	E9PW43_MOUSE	101055909	Gm10320	0	0	0	12485459	1.10673e+07	9.75468e+06	-	-	-	not significant
S810	E9PW37_MOUSE	226525	Rasal2	0	0	0	2.24811e+06	1.98961e+06	2.17672e+06	-	-	-	not significant
S774	KI67_MOUSE	17345	Mki67	0	0	0	991559	999343	1.13043e+06	-	-	-	not significant
S503	KI67_MOUSE	17345	Mki67	0	0	0	1.60128e+07	1.46996e+07	1.35037e+07	-	-	-	not significant
S223	E9PVA2_MOUSE	101867	Rrp8	0	0	0	1974234	1.78557e+06	2.10543e+06	-	-	-	not significant
S44	DGKD_MOUSE	227333	Dgkd	0	0	0	1.50877e+06	1.23032e+06	1.54399e+06	-	-	-	not significant
T712	E9PUK6_MOUSE	51796	Srrm1	0	0	0	2.5393e+06	2.31539e+06	1.82723e+06	-	-	-	not significant
S713	E9PUK6_MOUSE	51796	Srrm1	0	0	0	2.5393e+06	2.31539e+06	1.82723e+06	-	-	-	not significant
T633	E9PUK6_MOUSE	51796	Srrm1	0	0	0	1.12989e+07	9.15927e+06	1.18205e+07	-	-	-	not significant
S743	E9PUK6_MOUSE	51796	Srrm1	0	0	0	10388428	1.87486e+07	1.66579e+07	-	-	-	not significant
T745	E9PUK6_MOUSE	51796	Srrm1	0	0	0	1.1839e+07	1.87486e+07	1.85406e+07	-	-	-	not significant
S655	E9PUK6_MOUSE	51796	Srrm1	0	0	0	8.95201e+06	3.76499e+06	2.32621e+06	-	-	-	not significant
S657	E9PUK6_MOUSE	51796	Srrm1	0	0	0	1.19558e+07	5.16342e+06	3.15072e+06	-	-	-	not significant
S645	E9PUK6_MOUSE	51796	Srrm1	0	0	0	1.45184e+07	1.95163e+07	1.65258e+07	-	-	-	not significant
S647	E9PUK6_MOUSE	51796	Srrm1	0	0	0	14243717	1.90314e+07	1.60073e+07	-	-	-	not significant
S591	E9PUK6_MOUSE	51796	Srrm1	0	0	0	8579035	1.07143e+07	1.2064e+07	-	-	-	not significant
T593	E9PUK6_MOUSE	51796	Srrm1	0	0	0	8579035	1.07143e+07	1.2064e+07	-	-	-	not significant
S561	E9PUK6_MOUSE	51796	Srrm1	0	0	0	9.48036e+06	1.08507e+07	1.43685e+07	-	-	-	not significant
S563	E9PUK6_MOUSE	51796	Srrm1	0	0	0	9.48036e+06	1.08507e+07	1.43685e+07	-	-	-	not significant
S448	E9PUK6_MOUSE	51796	Srrm1	0	0	0	2.10684e+07	2.07189e+07	2.56984e+07	-	-	-	not significant
S450	E9PUK6_MOUSE	51796	Srrm1	0	0	0	5.86707e+06	5.87117e+06	4.9014e+06	-	-	-	not significant
S672	E9PUK6_MOUSE	51796	Srrm1	0	0	0	2.23072e+07	4.04838e+07	3.5139e+07	-	-	-	not significant
S664	E9PUK6_MOUSE	51796	Srrm1	0	0	0	5878356	8.54141e+06	7.50846e+06	-	-	-	not significant
T429	E9PUF7_MOUSE	16801	Arhgef1	0	0	0	5.29624e+06	4.05143e+06	4.3877e+06	-	-	-	not significant
S686	E9PUF7_MOUSE	16801	Arhgef1	0	0	0	1.344e+06	1.35515e+06	1.36869e+06	-	-	-	not significant
S197	E9PUF7_MOUSE	16801	Arhgef1	0	0	0	1.88792e+06	1.89174e+06	1.51032e+06	-	-	-	not significant
S939	E9PUA3_MOUSE	232227	Iqsec1	0	0	0	2.02819e+06	1.58518e+06	1.73123e+06	-	-	-	not significant
S2	D3Z7P0_MOUSE	107976	Babam2	0	0	0	830941	662006	835189	-	-	-	not significant
S467	D3Z710_MOUSE	232943	Klc3	0	0	0	1.54408e+06	1.35627e+06	1.57127e+06	-	-	-	not significant
S513	D3Z6J1_MOUSE	76131	Depdc1a	0	0	0	3.5892e+06	3.27108e+06	3.02279e+06	-	-	-	not significant
S20	D3Z5N5_MOUSE	18711	Pikfyve	0	0	0	1.43844e+06	1.56618e+06	1.52396e+06	-	-	-	not significant
T34	D3Z5N5_MOUSE	18711	Pikfyve	0	0	0	1.43844e+06	1.56618e+06	1.52396e+06	-	-	-	not significant
S437	D3Z3E0_MOUSE	107823	Nsd2	0	0	0	460335	3.04433e+06	993323	-	-	-	not significant
S279	D3Z2W0_MOUSE	57783	Tnip1	0	0	0	2.88963e+06	2.40808e+06	3.59373e+06	-	-	-	not significant
S316	CCDC6_MOUSE	76551	Ccdc6	0	0	0	2506138	1.32609e+06	1.2753e+06	-	-	-	not significant
T194	SAFB1_MOUSE	224903	Safb	0	0	0	8555235	8.4784e+06	8.86288e+06	-	-	-	not significant
S465	SAFB1_MOUSE	224903	Safb	0	0	0	1.09659e+06	1.12595e+06	1.40218e+06	-	-	-	not significant
S354	SAFB1_MOUSE	224903	Safb	0	0	0	3481499	3.44435e+06	3.96001e+06	-	-	-	not significant
S397	SAMD1_MOUSE	666704	Samd1	0	0	0	2.1125e+06	2.21596e+06	1.16978e+06	-	-	-	not significant
T44	D3YXF2_MOUSE	97820	4833439L19Rik	0	0	0	3.20377e+06	3.37704e+06	4.53407e+06	-	-	-	not significant
S436	D3YTT6_MOUSE	71720	Osbpl3	0	0	0	7817847	7.98094e+06	6.39013e+06	-	-	-	not significant
S24	D3YTR4_MOUSE	17192	Mbd3	0	0	0	1.69506e+06	1.83808e+06	1.60101e+06	-	-	-	not significant
S342	OSBL8_MOUSE	237542	Osbpl8	0	0	0	2627505	2.27772e+06	2.83649e+06	-	-	-	not significant
S280	B5B2N2_MOUSE	18018	Nfatc1	0	0	0	4481187	3.30015e+06	2.80098e+06	-	-	-	not significant
S284	B5B2N2_MOUSE	18018	Nfatc1	0	0	0	4481187	3.30015e+06	2.80098e+06	-	-	-	not significant
S288	B5B2N2_MOUSE	18018	Nfatc1	0	0	0	4481187	3.30015e+06	2.80098e+06	-	-	-	not significant
S404	B5B2N2_MOUSE	18018	Nfatc1	0	0	0	1.09177e+06	5.41943e+06	1.17088e+06	-	-	-	not significant
S672	RBM25_MOUSE	67039	Rbm25	0	0	0	2368398	2.45023e+06	1.89092e+06	-	-	-	not significant
S274	B2RXQ2_MOUSE	233977	Ppfia1	0	0	0	788243	537838	657838	-	-	-	not significant
T1437	B2RUG9_MOUSE	11789	Apc	0	0	0	11500267	1.12725e+07	1.04732e+07	-	-	-	not significant
S2283	B2RUG9_MOUSE	11789	Apc	0	0	0	1.19264e+06	1.12495e+06	606847	-	-	-	not significant
S1040	B2RUG9_MOUSE	11789	Apc	0	0	0	2.65824e+06	2.23003e+06	2.8766e+06	-	-	-	not significant
S1417	THOC2_MOUSE	331401	Thoc2	0	0	0	1.9492e+06	4.01929e+06	3.08147e+06	-	-	-	not significant
S329	TM245_MOUSE	242474	Tmem245	0	0	0	9061302	9.15713e+06	8.68166e+06	-	-	-	not significant
S824	B1AYU7_MOUSE	80744	Cwc22	0	0	0	1.8836e+06	3.03301e+06	2.95257e+06	-	-	-	not significant
S1083	ZN462_MOUSE	242466	Znf462	0	0	0	1.17616e+06	1.6006e+06	1.70237e+06	-	-	-	not significant
T373	B1AVP1_MOUSE	17355	Aff1	0	0	0	844174	1.06284e+06	1.33214e+06	-	-	-	not significant
T138	B1AU76_MOUSE	50927	Nasp	0	0	0	3.53083e+06	3.4055e+06	3.24738e+06	-	-	-	not significant
S387	B1AU76_MOUSE	50927	Nasp	0	0	0	711324	1.33184e+06	1.89607e+06	-	-	-	not significant
S269	B1ATR2_MOUSE	21763	Tex2	0	0	0	2.05848e+06	1.36266e+06	1.80332e+06	-	-	-	not significant
S99	B1ATL6_MOUSE	26398	Map2k4	0	0	0	743380	564390	708541	-	-	-	not significant
S633	B1ATD5_MOUSE	74302	Mtmr3	0	0	0	1.66131e+06	1.78897e+06	2.40522e+06	-	-	-	not significant
S221	B1AS67_MOUSE	269608	Plekhg5	0	0	0	758996	1.02835e+06	1.03359e+06	-	-	-	not significant
S820	B1ARU4_MOUSE	11426	Macf1	0	0	0	363810	532573	429564	-	-	-	not significant
S7295	B1ARU4_MOUSE	11426	Macf1	0	0	0	4.26326e+06	3.62122e+06	3.81416e+06	-	-	-	not significant
S280	B1ARU4_MOUSE	11426	Macf1	0	0	0	2.35546e+06	2.35341e+06	2.08829e+06	-	-	-	not significant
S1368	B1ART2_MOUSE	230895	Vps13d	0	0	0	768511	601700	383765	-	-	-	not significant
S19	D19L1_MOUSE	244745	Dpy19l1	0	0	0	1.68442e+06	1.43557e+06	1.58396e+06	-	-	-	not significant
S1648	DEN4C_MOUSE	329877	Dennd4c	0	0	0	6371966	1.64899e+06	5.4671e+06	-	-	-	not significant
S1274	DEN4C_MOUSE	329877	Dennd4c	0	0	0	1.95351e+06	2.29648e+06	1.82712e+06	-	-	-	not significant
S523	KANL3_MOUSE	226976	Kansl3	0	0	0	1.46772e+06	1.7148e+06	1.43243e+06	-	-	-	not significant
T574	A2CG76_MOUSE	110147	Ehmt2	0	0	0	496056	534933	626191	-	-	-	not significant
S756	ARI4B_MOUSE	94246	Arid4b	0	0	0	2245336	2.28803e+06	3.13964e+06	-	-	-	not significant
S281	AT7L3_MOUSE	217218	Atxn7l3	0	0	0	1.87919e+06	541687	1.75493e+06	-	-	-	not significant
S602	A2AWS5_MOUSE	15184	Hdac5	0	0	0	1.67943e+06	1.67303e+06	1.55706e+06	-	-	-	not significant
S465	A2ATP6_MOUSE	17876	Myef2	0	0	0	911075	846487	729659	-	-	-	not significant
S422	A2ATP6_MOUSE	17876	Myef2	0	0	0	1.85374e+06	1.93996e+06	1.87051e+06	-	-	-	not significant
S188	A2ATN9_MOUSE	59126	Nek6	0	0	0	6.25307e+06	7.31895e+06	6.20812e+06	-	-	-	not significant
S195	A2ATN9_MOUSE	59126	Nek6	0	0	0	1.88854e+06	1.86144e+06	1.82502e+06	-	-	-	not significant
S939	VIP1_MOUSE	327655	Ppip5k1	0	0	0	915147	968520	912834	-	-	-	not significant
S4827	A2ANY6_MOUSE	100019	Mdn1	0	0	0	3.62406e+07	2.36831e+07	2.45427e+07	-	-	-	not significant
S484	AF9_MOUSE	70122	Mllt3	0	0	0	1.25356e+06	1.45564e+06	1.70706e+06	-	-	-	not significant
S223	A2ALS7_MOUSE	110351	Rap1gap	0	0	0	2.94766e+06	3.41366e+06	4.07972e+06	-	-	-	not significant
S832	CNTRL_MOUSE	26920	Cntrl	0	0	0	1.24327e+06	1.94093e+06	1.73437e+06	-	-	-	not significant
S280	A2AKA9_MOUSE	67382	Brd3	0	0	0	1.59913e+06	1.59287e+06	1.64942e+06	-	-	-	not significant
S2171	CHD7_MOUSE	320790	Chd7	0	0	0	538105	450712	439405	-	-	-	not significant
S382	A2AJI1_MOUSE	245877	Map7d1	0	0	0	2.75716e+06	3.14026e+06	2.40295e+06	-	-	-	not significant
S329	A2AJI1_MOUSE	245877	Map7d1	0	0	0	759628	713946	1.24063e+06	-	-	-	not significant
S535	A2AJ72_MOUSE	320267	Fubp3	0	0	0	3.02702e+06	2.98192e+06	2.74533e+06	-	-	-	not significant
S245	A2AEW0_MOUSE	209446	Tfe3	0	0	0	7927810	3.41245e+06	3.87235e+06	-	-	-	not significant
S434	A2AEM2_MOUSE	229725	Clcc1	0	0	0	8877505	8.76542e+06	7.06149e+06	-	-	-	not significant
S400	TBKB1_MOUSE	73174	Tbkbp1	0	0	0	985470	1.03479e+06	883400	-	-	-	not significant
S929	A2A9M4_MOUSE	67299	Dock7	0	0	0	6055211	4.31563e+06	4.25781e+06	-	-	-	not significant
S1382	A2A9M4_MOUSE	67299	Dock7	0	0	0	7209551	5.53595e+06	5.65698e+06	-	-	-	not significant
S384	A2A8W8_MOUSE	17346	Mknk1	0	0	0	1.2053e+06	2.27501e+06	2.19765e+06	-	-	-	not significant
S441	TM201_MOUSE	230917	Tmem201	0	0	0	11924925	1.01592e+07	7.76525e+06	-	-	-	not significant
S2324	ZEP3_MOUSE	16656	Hivep3	0	0	0	600633	622303	431394	-	-	-	not significant
S123	A2A842_MOUSE	269587	Epb41	0	0	0	724826	4.1457e+06	3.59242e+06	-	-	-	not significant
S886	K1522_MOUSE	97130	Kiaa1522	0	0	0	3058834	3.65097e+06	3.55739e+06	-	-	-	not significant
S543	K1522_MOUSE	97130	Kiaa1522	0	0	0	13128010	1.15294e+07	1.25502e+07	-	-	-	not significant
S1256	A2A7B5_MOUSE	110593	Prdm2	0	0	0	4.94259e+06	5.33535e+06	4.42458e+06	-	-	-	not significant
S1206	GPTC8_MOUSE	237943	Gpatch8	0	0	0	1446490	2.05441e+06	968022	-	-	-	not significant
S835	ZN335_MOUSE	329559	Znf335	0	0	0	1.27262e+06	1.26271e+06	1.36241e+06	-	-	-	not significant
S743	A2A484_MOUSE	228880	Zmynd8	0	0	0	2.20352e+06	1.66316e+06	2.04053e+06	-	-	-	not significant
S658	A2A484_MOUSE	228880	Zmynd8	0	0	0	2.12274e+07	1.6553e+07	1.16324e+07	-	-	-	not significant
S436	A2A484_MOUSE	228880	Zmynd8	0	0	0	2204983	950097	1.49818e+06	-	-	-	not significant
S184	TBC25_MOUSE	209815	Tbc1d25	0	0	0	1.12178e+06	1.27433e+06	1.23839e+06	-	-	-	not significant
T767	A0A6Q6PUT5_MOUSE	56194	Prpf40a	0	0	0	1.08977e+06	669498	1.09893e+06	-	-	-	not significant
S449	A0A6I8MX08_MOUSE	108686	Ccdc88a	0	0	0	822618	883646	827190	-	-	-	not significant
S1005	A0A6I8MX07_MOUSE	99412	Golga2	0	0	0	663310	669498	842908	-	-	-	not significant
S93	A0A5F8MPX8_MOUSE	13626	Eed	0	0	0	1.24924e+06	1.01153e+06	1.23537e+06	-	-	-	not significant
T499	A0A5F8MP98_MOUSE	319939	Tns3	0	0	0	1.56042e+06	1.67136e+06	1.65993e+06	-	-	-	not significant
S1047	A0A5F8MP98_MOUSE	319939	Tns3	0	0	0	3.33323e+06	3.45644e+06	3.3973e+06	-	-	-	not significant
S21	A0A571BGD8_MOUSE	329251	Ppp1r12b	0	0	0	1.95991e+06	1.49632e+06	1.31998e+06	-	-	-	not significant
S42	A0A571BF12_MOUSE	212391	Lcor	0	0	0	985870	1.09443e+06	822299	-	-	-	not significant
S79	A0A571BEI2_MOUSE	269774	Aak1	0	0	0	2.81384e+06	4.18133e+06	2.7798e+06	-	-	-	not significant
S24	A0A571BEI2_MOUSE	269774	Aak1	0	0	0	2.6209e+06	7.1595e+06	3.61682e+06	-	-	-	not significant
S193	A0A571BDM4_MOUSE	269774	Aak1	0	0	0	11593774	1.09965e+07	1.08086e+07	-	-	-	not significant
T453	A0A498WGG5_MOUSE	192285	Phf21a	0	0	0	1.70559e+06	2.0526e+06	1.78472e+06	-	-	-	not significant
T359	A0A498WGG5_MOUSE	192285	Phf21a	0	0	0	4.8827e+06	4.16723e+06	4.52683e+06	-	-	-	not significant
S860	A0A494BBI9_MOUSE	14218	Sh3pxd2a	0	0	0	7.76294e+06	7.48863e+06	6.92111e+06	-	-	-	not significant
S882	A0A3B2WAQ7_MOUSE	224650	Anks1	0	0	0	2.50558e+06	2.17443e+06	1.93665e+06	-	-	-	not significant
S1602	A0A338P6U8_MOUSE	239985	Arid1b	0	0	0	2.7091e+06	2.6046e+06	2.01674e+06	-	-	-	not significant
T1166	A0A338P697_MOUSE	208146	Yeats2	0	0	0	913858	902752	1.1574e+06	-	-	-	not significant
S55	A0A2U3TZF4_MOUSE	239555	Mief1	0	0	0	1.988e+06	2.06115e+06	1.8263e+06	-	-	-	not significant
T819	A0A2K6EDP7_MOUSE	218973	Wdhd1	0	0	0	1.15693e+06	1.40281e+06	2.11379e+06	-	-	-	not significant
S1208	A0A2I3BRX9_MOUSE	56784	Ralgapa1	0	0	0	1771300	1.67049e+06	1.43193e+06	-	-	-	not significant
S88	A0A2I3BRL8_MOUSE	652988	Gm7324	0	0	0	57137194	5.1972e+07	4.69179e+07	-	-	-	not significant
S326	A0A2I3BRL8_MOUSE	652988	Gm7324	0	0	0	2.06597e+06	1.70831e+06	1.87707e+06	-	-	-	not significant
S571	A0A2I3BRD1_MOUSE	67581	Tbc1d23	0	0	0	3.14836e+06	1.2386e+06	1.28287e+06	-	-	-	not significant
S507	A0A2I3BRD1_MOUSE	67581	Tbc1d23	0	0	0	1.28422e+06	1.00976e+06	1.14659e+06	-	-	-	not significant
S15	A0A2I3BQ54_MOUSE	67011	Mettl6	0	0	0	1.34595e+06	1.46973e+06	1.18894e+06	-	-	-	not significant
T43	A0A2I3BPW0_MOUSE	29811	Ndrg2	0	0	0	1.69054e+06	1.84543e+06	1.56571e+06	-	-	-	not significant
S1514	A0A2I3BPQ5_MOUSE	67302	Zc3h13	0	0	0	1204965	1.74658e+06	1.52684e+06	-	-	-	not significant
S1517	A0A2I3BPQ5_MOUSE	67302	Zc3h13	0	0	0	1204965	1.74658e+06	1.52684e+06	-	-	-	not significant
S1527	A0A2I3BPQ5_MOUSE	67302	Zc3h13	0	0	0	1204965	1.74658e+06	1.52684e+06	-	-	-	not significant
S1086	A0A2I3BPQ5_MOUSE	67302	Zc3h13	0	0	0	1.48022e+06	1.94939e+06	1.93616e+06	-	-	-	not significant
S1090	A0A2I3BPQ5_MOUSE	67302	Zc3h13	0	0	0	3.89304e+06	5.12196e+06	1.93616e+06	-	-	-	not significant
S1093	A0A2I3BPQ5_MOUSE	67302	Zc3h13	0	0	0	3.89304e+06	5.12196e+06	1.93616e+06	-	-	-	not significant
S110	A0A2I3BPQ5_MOUSE	67302	Zc3h13	0	0	0	1.81657e+06	1.06242e+06	1.18077e+06	-	-	-	not significant
S971	A0A286YCX6_MOUSE	75964	Trappc8	0	0	0	2.47275e+06	2.85436e+06	2.66553e+06	-	-	-	not significant
S282	A0A286YCP6_MOUSE	17190	Mbd1	0	0	0	931147	841752	615521	-	-	-	not significant
S14	A0A1Y7VMT3_MOUSE	15902	Id2	0	0	0	1.39195e+06	763723	1.17585e+06	-	-	-	not significant
S1457	A0A1Y7VMH7_MOUSE	77480	Kidins220	0	0	0	15604179	1.54778e+07	1.49417e+07	-	-	-	not significant
S100	A0A1W2P7T9_MOUSE	668212	Efr3b	0	0	0	2.54662e+06	1.92912e+06	1.72306e+06	-	-	-	not significant
S272	A0A1W2P7K6_MOUSE	216363	Rab3ip	0	0	0	1.31218e+06	1.46595e+06	1.50321e+06	-	-	-	not significant
S185	A0A1N9PTV1_MOUSE	14123	Fbrs	0	0	0	4.74472e+06	6.55559e+06	9.27405e+06	-	-	-	not significant
S186	A0A1N9PTV1_MOUSE	14123	Fbrs	0	0	0	4.74472e+06	6.55559e+06	9.27405e+06	-	-	-	not significant
S41	A0A1N9M8A6_MOUSE	76863	Dcun1d5	0	0	0	917052	841635	1.00308e+06	-	-	-	not significant
S709	A0A1L1SR96_MOUSE	382014	Ano8	0	0	0	3.01286e+06	1.44578e+06	2.48376e+06	-	-	-	not significant
S686	A0A1D5RM97_MOUSE	546071	Mast3	0	0	0	5810513	5.16116e+06	5.00732e+06	-	-	-	not significant
S140	A0A1D5RM97_MOUSE	546071	Mast3	0	0	0	5.3999e+06	7.13911e+06	6.49631e+06	-	-	-	not significant
S42	A0A1D5RLW5_MOUSE	19899	Rpl18a	0	0	0	1.0768e+06	1.20457e+06	1.24499e+06	-	-	-	not significant
S969	A0A1D5RLV7_MOUSE	72145	Wdfy3	0	0	0	1.46067e+06	1.8892e+06	1.60206e+06	-	-	-	not significant
S277	A0A1D5RLV0_MOUSE	73473	Iws1	0	0	0	6.04317e+07	5.76187e+07	6.03297e+07	-	-	-	not significant
S280	A0A1D5RLV0_MOUSE	73473	Iws1	0	0	0	8.69205e+07	8.03493e+07	9.06317e+07	-	-	-	not significant
S289	A0A1D5RLV0_MOUSE	73473	Iws1	0	0	0	4.31447e+07	3.33667e+07	4.02146e+07	-	-	-	not significant
S183	A0A1D5RLV0_MOUSE	73473	Iws1	0	0	0	530217	689993	654060	-	-	-	not significant
S185	A0A1D5RLV0_MOUSE	73473	Iws1	0	0	0	530217	689993	654060	-	-	-	not significant
S321	A0A1D5RLV0_MOUSE	73473	Iws1	0	0	0	826906	366574	499003	-	-	-	not significant
S87	A0A1D5RLN9_MOUSE	414084	Tnip3	0	0	0	9579505	9.0518e+06	7.91857e+06	-	-	-	not significant
S439	A0A1B0GRZ5_MOUSE	54006	Deaf1	0	0	0	788745	898948	828750	-	-	-	not significant
S780	A0A1B0GRJ0_MOUSE	75767	Rab11fip1	0	0	0	3.00799e+06	2.9958e+06	2.63125e+06	-	-	-	not significant
T1030	A0A1B0GR85_MOUSE	243219	2900026A02Rik	0	0	0	1999887	1.92668e+06	1.82333e+06	-	-	-	not significant
S1035	A0A1B0GR85_MOUSE	243219	2900026A02Rik	0	0	0	1999887	1.92668e+06	1.82333e+06	-	-	-	not significant
S50	A0A1B0GQW2_MOUSE	19158	Cyth2	0	0	0	3.18115e+06	2.58056e+06	3.2671e+06	-	-	-	not significant
S2379	A0A140LJJ5_MOUSE	75547	Akap13	0	0	0	1.87195e+06	1.20689e+06	1.12235e+06	-	-	-	not significant
S1253	A0A140LJJ5_MOUSE	75547	Akap13	0	0	0	5.42522e+06	5.66678e+06	5.58526e+06	-	-	-	not significant
S126	A0A0U1RPV7_MOUSE	74035	Nol9	0	0	0	11629197	1.33478e+07	1.15606e+07	-	-	-	not significant
S447	A0A0U1RPL0_MOUSE	233871	Atxn2l	0	0	0	1.47696e+06	1.29536e+06	1.49678e+06	-	-	-	not significant
S178	A0A0R4J2B2_MOUSE	239217	Kctd12	0	0	0	1.13938e+06	2.71827e+06	1.91192e+06	-	-	-	not significant
S45	A0A0R4J243_MOUSE	71954	Suds3	0	0	0	1.96032e+06	1.66095e+06	1.6957e+06	-	-	-	not significant
T49	A0A0R4J243_MOUSE	71954	Suds3	0	0	0	1.96032e+06	1.66095e+06	1.6957e+06	-	-	-	not significant
S53	A0A0R4J243_MOUSE	71954	Suds3	0	0	0	1.96032e+06	1.66095e+06	1.6957e+06	-	-	-	not significant
S626	A0A0R4J1E9_MOUSE	15251	Hif1a	0	0	0	2.07388e+06	1.97368e+06	1.82377e+06	-	-	-	not significant
S438	A0A0R4J1E9_MOUSE	15251	Hif1a	0	0	0	1.55859e+06	1.41885e+06	1.86e+06	-	-	-	not significant
S566	A0A0R4J175_MOUSE	105246	Brd9	0	0	0	6.40541e+06	1.64997e+06	7.30426e+06	-	-	-	not significant
S482	A0A0R4J175_MOUSE	105246	Brd9	0	0	0	1200641	1.30119e+06	1.24327e+06	-	-	-	not significant
S445	A0A0R4J101_MOUSE	20535	Slc4a2	0	0	0	2.04509e+06	1.40726e+06	1.31355e+06	-	-	-	not significant
T326	A0A0R4J0T8_MOUSE	66251	Arfgap3	0	0	0	937337	921039	661202	-	-	-	not significant
S420	A0A0R4J0Q5_MOUSE	16907	Lmnb2	0	0	0	5131063	5.79443e+06	5.89259e+06	-	-	-	not significant
S414	A0A0R4J0G4_MOUSE	74334	Ranbp10	0	0	0	14094351	1.35105e+07	1.3154e+07	-	-	-	not significant
S23	A0A0R4J031_MOUSE	66854	Trim35	0	0	0	1.58689e+06	1.61237e+06	1.5846e+06	-	-	-	not significant
S518	A0A0R4IZZ6_MOUSE	55935	Fnbp4	0	0	0	397973	382608	469779	-	-	-	not significant
S1635	A0A0N4SV80_MOUSE	18139	Zfp638	0	0	0	3066454	2.71151e+06	2.97918e+06	-	-	-	not significant
S128	A0A0N4SV80_MOUSE	18139	Zfp638	0	0	0	1.85959e+06	1.28329e+06	1.00418e+06	-	-	-	not significant
T98	A0A0H2UKB8_MOUSE	170822	Usp33	0	0	0	1.2863e+06	1.25387e+06	1.17357e+06	-	-	-	not significant
S16	A0A0G2JEV2_MOUSE	12615	Cenpa	0	0	0	3.20372e+06	3.67456e+06	1.95758e+06	-	-	-	not significant
T217	A0A0G2JE03_MOUSE	59008	Anapc5	0	0	0	1.49878e+06	1.4855e+06	1.5044e+06	-	-	-	not significant
S69	A0A0G2JDP0_MOUSE	23897	Hax1	0	0	0	820681	795360	811005	-	-	-	not significant
T1117	A0A0A6YY83_MOUSE	54216	Pcdh7	0	0	0	872720	951924	1.31596e+06	-	-	-	not significant
S1121	A0A0A6YY83_MOUSE	54216	Pcdh7	0	0	0	872720	951924	1.31596e+06	-	-	-	not significant
S989	A0A0A6YY83_MOUSE	54216	Pcdh7	0	0	0	6.52435e+06	6.2997e+06	6.53233e+06	-	-	-	not significant
S243	A0A0A0MQ80_MOUSE	57815	Spata5	0	0	0	1.67886e+06	1.95842e+06	925909	-	-	-	not significant
S1234	A0A0A0MQ79_MOUSE	226562	Prrc2c	0	0	0	2.81301e+06	3.29116e+06	3.09616e+06	-	-	-	not significant
S1247	A0A0A0MQ79_MOUSE	226562	Prrc2c	0	0	0	1.32182e+06	1.29966e+06	1.49391e+06	-	-	-	not significant
T2632	A0A0A0MQ79_MOUSE	226562	Prrc2c	0	0	0	4.05869e+06	3.22655e+06	2.38385e+06	-	-	-	not significant
T1238	A0A0A0MQ79_MOUSE	226562	Prrc2c	0	0	0	2.0743e+06	2.05768e+06	1.9121e+06	-	-	-	not significant
S443	A0A087WQS2_MOUSE	66882	Bzw1	0	0	0	8261931	8.05295e+06	7.13207e+06	-	-	-	not significant
S445	A0A087WQS2_MOUSE	66882	Bzw1	0	0	0	8261931	8.05295e+06	7.13207e+06	-	-	-	not significant
S162	A0A087WNV1_MOUSE	15463	Agfg1	0	0	0	2.21652e+06	1.98936e+06	2.18365e+06	-	-	-	not significant
S36	Z4YJT3_MOUSE	73158	Larp1	5.31216e+06	5.69293e+06	6.30296e+06	0	0	0	-	-	-	not significant
S27	S4R2L4_MOUSE	208606	Rsrc2	4.13002e+06	6.14186e+06	6.68838e+06	0	0	0	-	-	-	not significant
S30	S4R2L4_MOUSE	208606	Rsrc2	6.32259e+06	9.0849e+06	1.06394e+07	0	0	0	-	-	-	not significant
S213	S4R248_MOUSE	75415	Arhgap12	3.3506e+06	3.75125e+06	2.51113e+06	0	0	0	-	-	-	not significant
S215	S4R189_MOUSE	268739	Arhgef40	1.05426e+06	797696	769287	0	0	0	-	-	-	not significant
S1445	S4R189_MOUSE	268739	Arhgef40	1.22643e+06	1.20784e+06	923113	0	0	0	-	-	-	not significant
S2027	ZN292_MOUSE	30046	Zfp292	3.23824e+06	3.59431e+06	2.94219e+06	0	0	0	-	-	-	not significant
T592	ILF3_MOUSE	16201	Ilf3	1.79014e+06	1.71373e+06	1.63585e+06	0	0	0	-	-	-	not significant
S535	BUB1B_MOUSE	12236	Bub1b	3.38024e+06	1.93516e+06	2.86942e+06	0	0	0	-	-	-	not significant
S402	RED_MOUSE	24010	Ik	2.67598e+06	2.92354e+06	2.67237e+06	0	0	0	-	-	-	not significant
T262	TRMB_MOUSE	17299	Mettl1	951937	1.11864e+06	746521	0	0	0	-	-	-	not significant
T577	RGAP1_MOUSE	26934	Racgap1	4.24931e+06	3.57602e+06	3.49582e+06	0	0	0	-	-	-	not significant
T89	FOXO4_MOUSE	54601	Foxo4	4.579e+06	3.82592e+06	2.99279e+06	0	0	0	-	-	-	not significant
S315	MS3L1_MOUSE	17692	Msl3	1.55417e+06	1.00442e+06	1.90574e+06	0	0	0	-	-	-	not significant
S185	TAGL2_MOUSE	21346	Tagln2	682765	963626	1.05516e+06	0	0	0	-	-	-	not significant
S12	STXB4_MOUSE	20913	Stxbp4	853033	1.26504e+06	1.27063e+06	0	0	0	-	-	-	not significant
S653	NFAT5_MOUSE	54446	Nfat5	3.31678e+06	2.79926e+06	2.74522e+06	0	0	0	-	-	-	not significant
S716	TBK1_MOUSE	56480	Tbk1	580917	766671	891082	0	0	0	-	-	-	not significant
S248	INCE_MOUSE	16319	Incenp	1.10904e+06	888876	1.06513e+06	0	0	0	-	-	-	not significant
S284	INCE_MOUSE	16319	Incenp	1.20681e+06	1.24707e+06	920587	0	0	0	-	-	-	not significant
S2155	NCOR2_MOUSE	20602	Ncor2	3.62321e+06	1.85887e+06	3.30678e+06	0	0	0	-	-	-	not significant
S2161	NCOR2_MOUSE	20602	Ncor2	3.62321e+06	1.85887e+06	3.30678e+06	0	0	0	-	-	-	not significant
S2165	NCOR2_MOUSE	20602	Ncor2	3.62321e+06	1.85887e+06	3.30678e+06	0	0	0	-	-	-	not significant
S1449	NCOR2_MOUSE	20602	Ncor2	5.49133e+06	5.97953e+06	4.7319e+06	0	0	0	-	-	-	not significant
S1220	NCOR2_MOUSE	20602	Ncor2	1.15284e+07	9.22532e+06	8.7737e+06	0	0	0	-	-	-	not significant
S680	NFKB2_MOUSE	18034	Nfkb2	686411	634840	791716	0	0	0	-	-	-	not significant
T178	H2AY_MOUSE	26914	Macroh2a1	1.99737e+06	1.89474e+06	1.49695e+06	0	0	0	-	-	-	not significant
S33	TSNAX_MOUSE	53424	Tsnax	796802	821996	791171	0	0	0	-	-	-	not significant
S465	ADDA_MOUSE	11518	Add1	8.49136e+06	5.5555e+06	4.02951e+06	0	0	0	-	-	-	not significant
S431	ADDA_MOUSE	11518	Add1	4.93964e+06	3.56161e+06	2.89092e+06	0	0	0	-	-	-	not significant
S1956	MYO9B_MOUSE	17925	Myo9b	2.71737e+06	2.16005e+06	2.41627e+06	0	0	0	-	-	-	not significant
T89	JMY_MOUSE	57748	Jmy	1.56746e+06	2.06165e+06	1.95713e+06	0	0	0	-	-	-	not significant
S748	POLK_MOUSE	27015	Polk	2.02911e+06	2.57517e+06	2.80819e+06	0	0	0	-	-	-	not significant
S140	AR6P4_MOUSE	65105	Arl6ip4	6.44655e+06	5.34707e+06	5.16086e+06	0	0	0	-	-	-	not significant
T420	BAG3_MOUSE	29810	Bag3	2.40882e+06	2.3248e+06	1.50391e+06	0	0	0	-	-	-	not significant
S376	HMGN5_MOUSE	50887	Hmgn5	3.34258e+06	4.33987e+06	4.67313e+06	0	0	0	-	-	-	not significant
S201	HAKAI_MOUSE	104836	Cbll1	1.52427e+06	1.80862e+06	1.94865e+06	0	0	0	-	-	-	not significant
S25	TMOD3_MOUSE	50875	Tmod3	1.15275e+06	1.2603e+06	1.21358e+06	0	0	0	-	-	-	not significant
S260	SPN90_MOUSE	80987	Nckipsd	915952	693042	1.57829e+06	0	0	0	-	-	-	not significant
S173	AFF4_MOUSE	93736	Aff4	3.67886e+06	4.01485e+06	3.87755e+06	0	0	0	-	-	-	not significant
S124	UBE4B_MOUSE	63958	Ube4b	1.4843e+06	1.47312e+06	1.45968e+06	0	0	0	-	-	-	not significant
S21	RBP2_MOUSE	19386	Ranbp2	6.57601e+06	6.91785e+06	7.61607e+06	0	0	0	-	-	-	not significant
S152	NUSAP_MOUSE	108907	Nusap1	6.76589e+06	6.15319e+06	6.55942e+06	0	0	0	-	-	-	not significant
S380	CERT_MOUSE	68018	Cert1	978084	3.13282e+06	830719	0	0	0	-	-	-	not significant
T152	BCAP_MOUSE	83490	Pik3ap1	1.05113e+07	8.74736e+06	8.32035e+06	0	0	0	-	-	-	not significant
S737	BCAP_MOUSE	83490	Pik3ap1	1.09445e+06	1.40862e+06	1.06536e+06	0	0	0	-	-	-	not significant
S502	TSC1_MOUSE	64930	Tsc1	1.05738e+06	1.20521e+06	808846	0	0	0	-	-	-	not significant
S526	RGS3_MOUSE	50780	Rgs3	3.42245e+06	3.24216e+06	1.96266e+06	0	0	0	-	-	-	not significant
S125	RIOK3_MOUSE	66878	Riok3	1.33004e+06	2.13702e+06	1.84871e+06	0	0	0	-	-	-	not significant
S127	RIOK3_MOUSE	66878	Riok3	1.33004e+06	2.13702e+06	1.84871e+06	0	0	0	-	-	-	not significant
S128	RIOK3_MOUSE	66878	Riok3	1.33004e+06	2.13702e+06	1.84871e+06	0	0	0	-	-	-	not significant
S81	POC5_MOUSE	67463	Poc5	2.61039e+06	2.22997e+06	2.60016e+06	0	0	0	-	-	-	not significant
S160	DDX59_MOUSE	67997	Ddx59	692431	1.17405e+06	859007	0	0	0	-	-	-	not significant
S451	SMG9_MOUSE	71997	Smg9	1.61323e+06	1.42347e+06	1.42215e+06	0	0	0	-	-	-	not significant
S25	SMG9_MOUSE	71997	Smg9	2.08709e+06	1.0935e+06	750895	0	0	0	-	-	-	not significant
S82	AVEN_MOUSE	74268	Aven	1.54798e+06	1.24766e+06	1.87397e+06	0	0	0	-	-	-	not significant
S465	HCFC2_MOUSE	67933	Hcfc2	2.12718e+06	1.99467e+06	1.81923e+06	0	0	0	-	-	-	not significant
T252	TTC33_MOUSE	67515	Ttc33	3.45445e+06	3.20717e+06	3.60316e+06	0	0	0	-	-	-	not significant
S172	TBB4A_MOUSE	22153	Tubb4a	855844	695567	791840	0	0	0	-	-	-	not significant
S377	CMIP_MOUSE	74440	Cmip	2.78708e+06	3.64668e+06	3951672	0	0	0	-	-	-	not significant
S140	MRNIP_MOUSE	68067	Mrnip	3.99246e+06	3.94116e+06	3.83676e+06	0	0	0	-	-	-	not significant
S191	ZBED3_MOUSE	72114	Zbed3	1.42959e+06	996238	1.47407e+06	0	0	0	-	-	-	not significant
S269	PINX1_MOUSE	72400	Pinx1	4.32019e+06	4.18014e+06	4.70015e+06	0	0	0	-	-	-	not significant
S274	PINX1_MOUSE	72400	Pinx1	4.32019e+06	4.18014e+06	4.70015e+06	0	0	0	-	-	-	not significant
S277	PINX1_MOUSE	72400	Pinx1	4.32019e+06	4.18014e+06	4.70015e+06	0	0	0	-	-	-	not significant
S282	NDE1_MOUSE	67203	Nde1	1.59588e+06	1.44287e+06	1.57924e+06	0	0	0	-	-	-	not significant
S154	BCL7A_MOUSE	77045	Bcl7a	3.43995e+06	3.57964e+06	4.39239e+06	0	0	0	-	-	-	not significant
T287	SNAG_MOUSE	108123	Napg	1.23372e+06	1.45852e+06	1.6687e+06	0	0	0	-	-	-	not significant
S277	SNX2_MOUSE	67804	Snx2	476303	750640	633669	0	0	0	-	-	-	not significant
S709	RAVR1_MOUSE	71766	Raver1	738736	895657	869259	0	0	0	-	-	-	not significant
S69	TIM16_MOUSE	66449	Pam16	2.27412e+06	2.23247e+06	2.03479e+06	0	0	0	-	-	-	not significant
S216	ZWINT_MOUSE	52696	Zwint	2.22585e+06	1.86765e+06	2.15922e+06	0	0	0	-	-	-	not significant
S154	PKP2_MOUSE	-	-	1.00632e+06	1.31968e+06	2.04687e+06	0	0	0	-	-	-	not significant
S57	DUT_MOUSE	110074	Dut	2.26611e+06	2.40244e+06	2.22001e+06	0	0	0	-	-	-	not significant
S200	ZN318_MOUSE	57908	Znf318	986495	1.16186e+06	981905	0	0	0	-	-	-	not significant
S721	ZN318_MOUSE	57908	Znf318	3.93727e+06	3.24003e+06	3.84633e+06	0	0	0	-	-	-	not significant
S616	OGFR_MOUSE	72075	Ogfr	1.66224e+06	1.67676e+06	1.58082e+06	0	0	0	-	-	-	not significant
S727	RTN4_MOUSE	68585	Rtn4	1.93919e+06	3.44221e+06	2.95203e+06	0	0	0	-	-	-	not significant
S730	RTN4_MOUSE	68585	Rtn4	1.93919e+06	3.44221e+06	2.95203e+06	0	0	0	-	-	-	not significant
S857	RTN4_MOUSE	68585	Rtn4	3.81975e+06	3.26504e+06	2.56396e+06	0	0	0	-	-	-	not significant
T463	NASP_MOUSE	50927	Nasp	3.93914e+06	2.89875e+06	4.19803e+06	0	0	0	-	-	-	not significant
S466	NASP_MOUSE	50927	Nasp	3.93914e+06	2.89875e+06	4.19803e+06	0	0	0	-	-	-	not significant
S175	NASP_MOUSE	50927	Nasp	2.16011e+06	1.76577e+06	2.74085e+06	0	0	0	-	-	-	not significant
S197	CDCA3_MOUSE	14793	Cdca3	3.46493e+06	2.65529e+06	1.03579e+06	0	0	0	-	-	-	not significant
S106	CDCA3_MOUSE	14793	Cdca3	1.31999e+06	525048	1.22586e+06	0	0	0	-	-	-	not significant
S648	ZN281_MOUSE	226442	Znf281	1.54271e+06	3.02813e+06	1.4529e+06	0	0	0	-	-	-	not significant
S347	GMPR2_MOUSE	105446	Gmpr2	1.13053e+06	708455	781817	0	0	0	-	-	-	not significant
S233	PGR1A_MOUSE	67278	Pagr1a	956730	746702	607881	0	0	0	-	-	-	not significant
S236	PGR1A_MOUSE	67278	Pagr1a	956730	746702	607881	0	0	0	-	-	-	not significant
S321	DCTN2_MOUSE	69654	Dctn2	867358	878883	1.05995e+06	0	0	0	-	-	-	not significant
S339	ARFG2_MOUSE	77038	Arfgap2	2.48695e+06	2.52401e+06	2.92667e+06	0	0	0	-	-	-	not significant
S432	GORS2_MOUSE	70231	Gorasp2	2.51676e+06	3.28876e+06	3.05786e+06	0	0	0	-	-	-	not significant
S203	SMRD2_MOUSE	83796	Smarcd2	5.3933e+06	5.48211e+06	6.27136e+06	0	0	0	-	-	-	not significant
S42	CDC26_MOUSE	66440	Cdc26	2.39555e+06	2.55564e+06	1.85003e+06	0	0	0	-	-	-	not significant
S12	DDB2_MOUSE	107986	Ddb2	1.27477e+06	1.06687e+06	1.23518e+06	0	0	0	-	-	-	not significant
S1450	MYO5A_MOUSE	17918	Myo5a	1.49449e+06	863715	882378	0	0	0	-	-	-	not significant
S1042	MED1_MOUSE	19014	Med1	4.50149e+06	1.64605e+06	4.54263e+06	0	0	0	-	-	-	not significant
S2304	CIC_MOUSE	71722	Cic	1.38034e+06	2.91446e+06	2.19231e+06	0	0	0	-	-	-	not significant
S1625	CIC_MOUSE	71722	Cic	1.22359e+06	779542	599856	0	0	0	-	-	-	not significant
S111	Q921G9_MOUSE	27375	Tjp3	1.7684e+06	2.5712e+06	1.86007e+06	0	0	0	-	-	-	not significant
T926	WDR7_MOUSE	104082	Wdr7	1.67925e+06	1.75157e+06	1.01805e+06	0	0	0	-	-	-	not significant
S117	Q91Z78_MOUSE	12177	Bnip3l	2.45259e+06	2.24007e+06	2.82838e+06	0	0	0	-	-	-	not significant
S724	SRGP2_MOUSE	14270	Srgap2	1.11235e+07	1.11559e+07	1.20883e+07	0	0	0	-	-	-	not significant
S734	CSCL1_MOUSE	208795	Tmem63a	1.78005e+06	1.83249e+06	1.58113e+06	0	0	0	-	-	-	not significant
S738	CSCL1_MOUSE	208795	Tmem63a	1.78005e+06	1.83249e+06	1.58113e+06	0	0	0	-	-	-	not significant
S32	NEUL_MOUSE	75805	Nln	1.60871e+06	1.23477e+06	981426	0	0	0	-	-	-	not significant
S514	RRP1B_MOUSE	72462	Rrp1b	2.33242e+06	2.54077e+06	2.09683e+06	0	0	0	-	-	-	not significant
S69	RBM5_MOUSE	83486	Rbm5	2.84891e+06	1.61773e+06	1.5779e+06	0	0	0	-	-	-	not significant
S129	AJUBA_MOUSE	16475	Ajuba	1.99252e+06	1.64836e+06	2.22804e+06	0	0	0	-	-	-	not significant
S365	GORS1_MOUSE	74498	Gorasp1	2.94094e+06	2.86271e+06	2.23502e+06	0	0	0	-	-	-	not significant
S674	KI18A_MOUSE	228421	Kif18a	275808	516154	541278	0	0	0	-	-	-	not significant
S349	TDRD3_MOUSE	219249	Tdrd3	1.13488e+06	746792	525704	0	0	0	-	-	-	not significant
S66	CYTIP_MOUSE	227929	Cytip	1.73018e+06	1.18382e+06	1.33521e+06	0	0	0	-	-	-	not significant
S657	PUS7_MOUSE	78697	Pus7	750893	461607	649701	0	0	0	-	-	-	not significant
T171	DX39A_MOUSE	68278	Ddx39a	4.31715e+06	3.13522e+06	2.67603e+06	0	0	0	-	-	-	not significant
T9	PSMD2_MOUSE	21762	Psmd2	1.43998e+07	1.03397e+07	1.65334e+07	0	0	0	-	-	-	not significant
S499	NDC1_MOUSE	72787	Ndc1	4.38551e+06	5.38827e+06	3.22633e+06	0	0	0	-	-	-	not significant
S241	NFAM1_MOUSE	74039	Nfam1	4.07711e+06	4.34535e+06	4.74626e+06	0	0	0	-	-	-	not significant
S612	LUZP1_MOUSE	269593	Luzp1	3.91658e+06	4.15132e+06	3.88529e+06	0	0	0	-	-	-	not significant
S421	I2BP1_MOUSE	272359	Irf2bp1	1.75912e+06	2.1869e+06	2.50281e+06	0	0	0	-	-	-	not significant
S663	BRD8_MOUSE	78656	Brd8	3.01151e+06	2.28653e+06	2.72283e+06	0	0	0	-	-	-	not significant
S621	Q8R2P8_MOUSE	85305	Kars	2.40149e+06	2.51135e+06	3.05154e+06	0	0	0	-	-	-	not significant
S617	Q8R2P8_MOUSE	85305	Kars	2.40149e+06	2.51135e+06	3.05154e+06	0	0	0	-	-	-	not significant
S137	TDIF2_MOUSE	99480	Dnttip2	2.32303e+06	3.02815e+06	2.8732e+06	0	0	0	-	-	-	not significant
S140	TDIF2_MOUSE	99480	Dnttip2	2.32303e+06	3.02815e+06	2.8732e+06	0	0	0	-	-	-	not significant
S449	SF3A1_MOUSE	67465	Sf3a1	2.16084e+06	2.08344e+06	2.84816e+06	0	0	0	-	-	-	not significant
S270	PITC1_MOUSE	71795	Pitpnc1	2.43362e+06	1.35206e+06	2.33178e+06	0	0	0	-	-	-	not significant
T85	PLCL2_MOUSE	224860	Plcl2	1.2771e+06	768724	1.19248e+06	0	0	0	-	-	-	not significant
S124	PLCL2_MOUSE	224860	Plcl2	1.43856e+06	1.32939e+06	1.48566e+06	0	0	0	-	-	-	not significant
S248	CK5P2_MOUSE	214444	Cdk5rap2	1.27867e+06	1.38954e+06	1.77964e+06	0	0	0	-	-	-	not significant
S226	CN093_MOUSE	74359	4931414P19Rik	1.70399e+06	1.17244e+06	1.21582e+06	0	0	0	-	-	-	not significant
S20	NEK9_MOUSE	217718	Nek9	1.14017e+06	1.34832e+06	1.03718e+06	0	0	0	-	-	-	not significant
S17	AGO2_MOUSE	239528	Ago2	2.68331e+06	2.59342e+06	3.64277e+06	0	0	0	-	-	-	not significant
S2188	ELYS_MOUSE	226747	Ahctf1	6.05411e+06	5.79412e+06	6.71268e+06	0	0	0	-	-	-	not significant
S1483	CROCC_MOUSE	230872	Crocc	1.53316e+06	1.20199e+06	1.64719e+06	0	0	0	-	-	-	not significant
T549	MBRL_MOUSE	216157	Tmem259	1.61354e+06	2.20492e+06	2.26272e+06	0	0	0	-	-	-	not significant
S253	KDM1B_MOUSE	218214	Kdm1b	3.33274e+06	3.13128e+06	3.31351e+06	0	0	0	-	-	-	not significant
S493	GNL3_MOUSE	30877	Gnl3	1.55197e+06	1.24377e+06	2.37509e+06	0	0	0	-	-	-	not significant
S468	GNL3_MOUSE	30877	Gnl3	1.83416e+06	1.68824e+06	1.74239e+06	0	0	0	-	-	-	not significant
S648	F193A_MOUSE	231128	Fam193a	5.53456e+06	6.06881e+06	5.65949e+06	0	0	0	-	-	-	not significant
S293	F193A_MOUSE	231128	Fam193a	407914	614088	446033	0	0	0	-	-	-	not significant
S1171	F193A_MOUSE	231128	Fam193a	648532	557992	638258	0	0	0	-	-	-	not significant
T446	ZSWM3_MOUSE	67538	Zswim3	703859	1.36754e+06	705315	0	0	0	-	-	-	not significant
T365	TF3B_MOUSE	12192	Brf1	1.03225e+06	1.29276e+06	1.40859e+06	0	0	0	-	-	-	not significant
S594	WDR24_MOUSE	268933	Wdr24	1.03431e+06	808965	670031	0	0	0	-	-	-	not significant
S598	WDR24_MOUSE	268933	Wdr24	1.03431e+06	808965	670031	0	0	0	-	-	-	not significant
S122	Q8CEC4_MOUSE	16601	Klf9	603914	737250	827427	0	0	0	-	-	-	not significant
S782	CNTRB_MOUSE	216846	Cntrob	708571	979656	883266	0	0	0	-	-	-	not significant
S63	CNTRB_MOUSE	216846	Cntrob	4.7449e+06	4.14273e+06	4.65711e+06	0	0	0	-	-	-	not significant
S657	DIDO1_MOUSE	23856	Dido1	1.2407e+06	921081	1.36066e+06	0	0	0	-	-	-	not significant
S1726	DIDO1_MOUSE	23856	Dido1	2.55098e+06	1.29623e+06	1.33902e+06	0	0	0	-	-	-	not significant
S182	CENPU_MOUSE	71876	Cenpu	4.04055e+06	3.57762e+06	4.82142e+06	0	0	0	-	-	-	not significant
S106	CENPU_MOUSE	71876	Cenpu	3.13102e+06	2.50096e+06	3.34422e+06	0	0	0	-	-	-	not significant
S436	F120C_MOUSE	207375	Fam120c	937357	1.11636e+06	920317	0	0	0	-	-	-	not significant
S122	Q8C2Q8_MOUSE	11949	Atp5c1	880286	889838	519220	0	0	0	-	-	-	not significant
S1345	SI1L1_MOUSE	217692	Sipa1l1	704532	697853	1.03687e+06	0	0	0	-	-	-	not significant
T508	GWL_MOUSE	67121	Mastl	836336	1.06136e+06	730039	0	0	0	-	-	-	not significant
S841	ZN609_MOUSE	214812	Znf609	2.66394e+06	3.2894e+06	3.8586e+06	0	0	0	-	-	-	not significant
S845	ZN609_MOUSE	214812	Znf609	2.66394e+06	3.2894e+06	3.8586e+06	0	0	0	-	-	-	not significant
S848	ZN609_MOUSE	214812	Znf609	2.66394e+06	3.2894e+06	3.8586e+06	0	0	0	-	-	-	not significant
S470	ZN609_MOUSE	214812	Znf609	1.22101e+06	1.0517e+06	1.12979e+06	0	0	0	-	-	-	not significant
S413	ZN609_MOUSE	214812	Znf609	86321.4	7.13415e+06	8.15224e+06	0	0	0	-	-	-	not significant
S433	ZN609_MOUSE	214812	Znf609	189407	7.13415e+06	9.17438e+06	0	0	0	-	-	-	not significant
S379	ZN609_MOUSE	214812	Znf609	2.76638e+06	2.73894e+06	3.08427e+06	0	0	0	-	-	-	not significant
S214	KPCD2_MOUSE	101540	Prkd2	1.73971e+06	1.13736e+06	1.29819e+06	0	0	0	-	-	-	not significant
S376	KPCD2_MOUSE	101540	Prkd2	665149	633741	773367	0	0	0	-	-	-	not significant
S2475	CHD9_MOUSE	109151	Chd9	1.4638e+06	1.76591e+06	2.15589e+06	0	0	0	-	-	-	not significant
S177	KANK2_MOUSE	235041	Kank2	1.47529e+06	1.61648e+06	1.43874e+06	0	0	0	-	-	-	not significant
S12	SENP7_MOUSE	66315	Senp7	213658	2.00915e+06	3.06405e+06	0	0	0	-	-	-	not significant
S1064	SRRM2_MOUSE	75956	Srrm2	964484	1.59883e+06	1.26346e+06	0	0	0	-	-	-	not significant
S1264	SRRM2_MOUSE	75956	Srrm2	2.00885e+06	1.87012e+06	2.25639e+06	0	0	0	-	-	-	not significant
S142	SRRM2_MOUSE	75956	Srrm2	1.83307e+06	1.67884e+06	1.73108e+06	0	0	0	-	-	-	not significant
S1075	ANR52_MOUSE	237615	Ankrd52	945769	1.05239e+06	1.14786e+06	0	0	0	-	-	-	not significant
S1439	TICRR_MOUSE	77011	Ticrr	3.29519e+06	3.88074e+06	3.39736e+06	0	0	0	-	-	-	not significant
S1002	TICRR_MOUSE	77011	Ticrr	2.77708e+06	2.79339e+06	2.51445e+06	0	0	0	-	-	-	not significant
S27	RFOX2_MOUSE	93686	Rbfox2	777449	1.08753e+06	949486	0	0	0	-	-	-	not significant
S14	ATRIP_MOUSE	235610	Atrip	544900	352446	615308	0	0	0	-	-	-	not significant
T765	HPS6_MOUSE	20170	Hps6	1.02718e+06	815738	1.37893e+06	0	0	0	-	-	-	not significant
S281	HIRP3_MOUSE	233876	Hirip3	328339	4.11166e+06	3.16165e+06	0	0	0	-	-	-	not significant
S48	RCC2_MOUSE	108911	Rcc2	3.08286e+06	1.77899e+06	2.88525e+06	0	0	0	-	-	-	not significant
S49	RCC2_MOUSE	108911	Rcc2	3.08286e+06	1.77899e+06	2.88525e+06	0	0	0	-	-	-	not significant
S43	RCC2_MOUSE	108911	Rcc2	1.97378e+06	1.92953e+06	2.52772e+06	0	0	0	-	-	-	not significant
S15	EME1_MOUSE	268465	Eme1	1.19044e+06	1.10642e+06	1.90166e+06	0	0	0	-	-	-	not significant
T521	ZC3HE_MOUSE	75553	Zc3h14	845786	2.71973e+06	972000	0	0	0	-	-	-	not significant
S533	ZC3HE_MOUSE	75553	Zc3h14	845786	2.71973e+06	972000	0	0	0	-	-	-	not significant
S266	AL14E_MOUSE	212772	Arl14ep	1.45742e+06	1.17052e+06	1.29887e+06	0	0	0	-	-	-	not significant
S573	ZN592_MOUSE	233410	Znf592	2.2836e+06	2.19075e+06	2.35626e+06	0	0	0	-	-	-	not significant
S859	ERC6L_MOUSE	236930	Ercc6l	800977	851923	696999	0	0	0	-	-	-	not significant
S425	IF4B_MOUSE	75705	Eif4b	133516	913153	249400	0	0	0	-	-	-	not significant
S597	IF4B_MOUSE	75705	Eif4b	1.90511e+06	1.04084e+06	983178	0	0	0	-	-	-	not significant
S725	DDX42_MOUSE	72047	Ddx42	4.64e+06	3.46689e+06	3.36648e+06	0	0	0	-	-	-	not significant
S932	CLSPN_MOUSE	269582	Clspn	990780	1.06672e+06	939299	0	0	0	-	-	-	not significant
S214	RBNS5_MOUSE	78287	Rbsn	6.36018e+06	5.99536e+06	4.09935e+06	0	0	0	-	-	-	not significant
S118	Q80Y32_MOUSE	70823	Hmgxb4	1.06533e+06	1.10487e+06	872444	0	0	0	-	-	-	not significant
S659	RHGBA_MOUSE	228482	Arhgap11a	1.33603e+06	1.68318e+06	1.23504e+06	0	0	0	-	-	-	not significant
S181	NUCKS_MOUSE	98415	Nucks1	1.84676e+06	1.85244e+06	662773	0	0	0	-	-	-	not significant
S494	SYMPK_MOUSE	68188	Sympk	6.5327e+06	5.46088e+06	5.27449e+06	0	0	0	-	-	-	not significant
S490	UBP2L_MOUSE	74383	Ubap2l	2.82627e+06	1.10848e+07	1.92484e+06	0	0	0	-	-	-	not significant
S187	CE024_MOUSE	78521	B230219D22Rik	3.61523e+06	3.70741e+06	4.92544e+06	0	0	0	-	-	-	not significant
S638	M18BP_MOUSE	217653	Mis18bp1	3.83423e+06	3.05923e+06	4.16963e+06	0	0	0	-	-	-	not significant
S199	TNC18_MOUSE	231861	Tnrc18	517003	443604	538842	0	0	0	-	-	-	not significant
S1091	UBN2_MOUSE	320538	Ubn2	1.2874e+06	1.5324e+06	1.1934e+06	0	0	0	-	-	-	not significant
S51	AKNA_MOUSE	100182	Akna	574178	1.21389e+06	640372	0	0	0	-	-	-	not significant
S261	KCMF1_MOUSE	74287	Kcmf1	2.0103e+06	2.03891e+06	3.22417e+06	0	0	0	-	-	-	not significant
S406	CL16A_MOUSE	74374	Clec16a	1.13484e+06	1.29319e+06	1.41736e+06	0	0	0	-	-	-	not significant
T593	RERE_MOUSE	68703	Rere	1.74305e+06	1.86719e+06	2.83414e+06	0	0	0	-	-	-	not significant
S998	VP13B_MOUSE	666173	Vps13b	758165	941957	1.35472e+06	0	0	0	-	-	-	not significant
S1001	VP13B_MOUSE	666173	Vps13b	758165	941957	1.35472e+06	0	0	0	-	-	-	not significant
S432	ST18_MOUSE	240690	St18	691341	630635	711108	0	0	0	-	-	-	not significant
S3664	STAR9_MOUSE	668880	Stard9	1.1275e+06	1.10608e+06	1.32874e+06	0	0	0	-	-	-	not significant
S3669	STAR9_MOUSE	668880	Stard9	1.1275e+06	1.10608e+06	1.32874e+06	0	0	0	-	-	-	not significant
S1161	SCAF4_MOUSE	224432	Scaf4	2.47477e+06	2.98747e+06	3.1735e+06	0	0	0	-	-	-	not significant
T956	ZN516_MOUSE	329003	Znf516	1.06831e+06	1.1722e+06	872259	0	0	0	-	-	-	not significant
S178	MYCB2_MOUSE	105689	Mycbp2	1.10729e+06	1.84682e+06	3.21391e+06	0	0	0	-	-	-	not significant
S189	MYCB2_MOUSE	105689	Mycbp2	1.10729e+06	1.84682e+06	3.21391e+06	0	0	0	-	-	-	not significant
S213	F117A_MOUSE	215512	Fam117a	2.73868e+06	2.73442e+06	2.02329e+06	0	0	0	-	-	-	not significant
S2362	HUWE1_MOUSE	59026	Huwe1	1.80768e+06	2.32866e+06	2.19511e+06	0	0	0	-	-	-	not significant
S2525	UBP34_MOUSE	17847	Usp34	2.27076e+06	2.17332e+06	1.94541e+06	0	0	0	-	-	-	not significant
S438	KDM3B_MOUSE	277250	Kdm3b	684293	561585	732548	0	0	0	-	-	-	not significant
S2094	RIF1_MOUSE	51869	Rif1	1.67399e+06	638413	1.12973e+06	0	0	0	-	-	-	not significant
S1540	RIF1_MOUSE	51869	Rif1	1.9038e+06	1.33312e+06	1.77173e+06	0	0	0	-	-	-	not significant
S298	NFRKB_MOUSE	235134	Nfrkb	1.1376e+06	1.34545e+06	1.14707e+06	0	0	0	-	-	-	not significant
S1169	WASC2_MOUSE	28006	Washc2	1.50144e+06	2.05928e+06	2.09008e+06	0	0	0	-	-	-	not significant
T200	TRA2A_MOUSE	101214	Tra2a	2.15239e+06	3.60302e+06	1.9573e+06	0	0	0	-	-	-	not significant
S839	NUP98_MOUSE	269966	Nup98	1.417e+06	1.59067e+06	1.50176e+06	0	0	0	-	-	-	not significant
S31	GPT2L_MOUSE	70373	Gpatch2l	1.03474e+06	1.13771e+06	1.22232e+06	0	0	0	-	-	-	not significant
S96	CHD4_MOUSE	107932	Chd4	2.65244e+06	3.1715e+06	2.60648e+06	0	0	0	-	-	-	not significant
S98	CHD4_MOUSE	107932	Chd4	2.65244e+06	3.1715e+06	2.60648e+06	0	0	0	-	-	-	not significant
S101	CHD4_MOUSE	107932	Chd4	2.65244e+06	3.1715e+06	2.60648e+06	0	0	0	-	-	-	not significant
S444	MSL1_MOUSE	74026	Msl1	941243	649848	1.11864e+06	0	0	0	-	-	-	not significant
S515	TXLNA_MOUSE	109658	Txlna	8.79032e+06	8.57803e+06	7.35189e+06	0	0	0	-	-	-	not significant
S523	TXLNA_MOUSE	109658	Txlna	8.79032e+06	8.57803e+06	7.35189e+06	0	0	0	-	-	-	not significant
S1540	AHDC1_MOUSE	230793	Ahdc1	2.26986e+06	1.81496e+06	1.10044e+06	0	0	0	-	-	-	not significant
S1498	AHDC1_MOUSE	230793	Ahdc1	776932	1.10907e+06	599926	0	0	0	-	-	-	not significant
S568	Q6P5B5_MOUSE	23879	Fxr2	5.25161e+06	3.15984e+06	7.23481e+06	0	0	0	-	-	-	not significant
S495	ANKL2_MOUSE	71782	Ankle2	838181	784224	642149	0	0	0	-	-	-	not significant
S19	HELB_MOUSE	117599	Helb	6.48919e+06	6.51473e+06	5.76701e+06	0	0	0	-	-	-	not significant
S638	Q6NV99_MOUSE	230376	Haus6	852495	855363	488299	0	0	0	-	-	-	not significant
S458	Q6NV99_MOUSE	230376	Haus6	905100	1.17821e+06	1.01575e+06	0	0	0	-	-	-	not significant
S37	SR140_MOUSE	67958	U2surp	5.19508e+06	5.42174e+06	5.5721e+06	0	0	0	-	-	-	not significant
S278	RETR2_MOUSE	227298	Retreg2	2.09748e+06	2.86336e+06	1.83184e+06	0	0	0	-	-	-	not significant
T644	NIPBL_MOUSE	71175	Nipbl	1.65605e+06	2.30752e+06	2.22769e+06	0	0	0	-	-	-	not significant
S304	NOP58_MOUSE	55989	Nop58	1.31956e+06	1.25637e+06	984822	0	0	0	-	-	-	not significant
T906	CE170_MOUSE	545389	Cep170	2.09302e+06	1.78076e+06	2.43713e+06	0	0	0	-	-	-	not significant
T692	MOR2A_MOUSE	74522	Morc2a	952218	881878	756610	0	0	0	-	-	-	not significant
S335	EHBP1_MOUSE	216565	Ehbp1	2.34761e+06	2.253e+06	2.82e+06	0	0	0	-	-	-	not significant
S1188	RIC1_MOUSE	226089	Ric1	1.42682e+06	1.23097e+06	943872	0	0	0	-	-	-	not significant
S731	ZCHC2_MOUSE	227449	Zcchc2	1.24717e+06	1.08852e+06	947601	0	0	0	-	-	-	not significant
S693	Q68FM7_MOUSE	213498	Arhgef11	1.00441e+06	1.00843e+06	876837	0	0	0	-	-	-	not significant
T702	Q68FM7_MOUSE	213498	Arhgef11	1.00441e+06	1.00843e+06	876837	0	0	0	-	-	-	not significant
T55	CEP43_MOUSE	75296	Cep43	2.00781e+06	2.40956e+06	1.96394e+06	0	0	0	-	-	-	not significant
S553	PLK4_MOUSE	20873	Plk4	813744	849086	863633	0	0	0	-	-	-	not significant
S1513	TOP2B_MOUSE	21974	Top2b	1.32463e+06	1.90015e+06	2.38851e+06	0	0	0	-	-	-	not significant
S772	TIF1A_MOUSE	21848	Trim24	479581	561272	254497	0	0	0	-	-	-	not significant
S110	TIF1A_MOUSE	21848	Trim24	1.32116e+06	4.07412e+06	3.21532e+06	0	0	0	-	-	-	not significant
S31	UT14A_MOUSE	72554	Utp14a	8.14214e+06	1.15809e+07	1.21506e+07	0	0	0	-	-	-	not significant
S1356	CCD18_MOUSE	73254	Ccdc18	733820	807079	793130	0	0	0	-	-	-	not significant
S1701	SPT6H_MOUSE	20926	Supt6h	2.12462e+06	1.52225e+06	1.2052e+06	0	0	0	-	-	-	not significant
S408	RU17_MOUSE	20637	Snrnp70	6.8713e+06	6.29394e+06	6.37658e+06	0	0	0	-	-	-	not significant
S332	RU17_MOUSE	20637	Snrnp70	3.56988e+06	3.27869e+06	2.89847e+06	0	0	0	-	-	-	not significant
S2127	SPTB2_MOUSE	20742	Sptbn1	1.12631e+06	1.25944e+06	2.49931e+06	0	0	0	-	-	-	not significant
T473	CP131_MOUSE	12009	Cep131	2.55847e+06	1.46148e+06	1.86227e+06	0	0	0	-	-	-	not significant
S1093	RAI1_MOUSE	19377	Rai1	721245	1.02201e+06	1.12336e+06	0	0	0	-	-	-	not significant
S115	RT31_MOUSE	57312	Mrps31	2.28436e+06	1.64247e+06	1.62091e+06	0	0	0	-	-	-	not significant
S991	ATRX_MOUSE	22589	Atrx	1.36009e+06	1.88689e+06	2.12242e+06	0	0	0	-	-	-	not significant
S992	ATRX_MOUSE	22589	Atrx	1.36009e+06	1.88689e+06	2.12242e+06	0	0	0	-	-	-	not significant
S993	ATRX_MOUSE	22589	Atrx	1.36009e+06	1.88689e+06	2.12242e+06	0	0	0	-	-	-	not significant
S626	ATRX_MOUSE	22589	Atrx	2.70912e+06	2.53841e+06	2.2195e+06	0	0	0	-	-	-	not significant
S912	ATRX_MOUSE	22589	Atrx	7.88589e+06	6.70665e+06	7.36027e+06	0	0	0	-	-	-	not significant
T84	TRI25_MOUSE	217069	Trim25	339953	431904	441303	0	0	0	-	-	-	not significant
S92	WBP4_MOUSE	22380	Wbp4	7.24986e+06	6.49087e+06	6.45258e+06	0	0	0	-	-	-	not significant
S157	LAP2B_MOUSE	21917	Tmpo	5.24597e+06	6.39213e+06	7.26276e+06	0	0	0	-	-	-	not significant
S158	LAP2B_MOUSE	21917	Tmpo	5.24597e+06	6.39213e+06	7.26276e+06	0	0	0	-	-	-	not significant
S115	LAP2B_MOUSE	21917	Tmpo	1.57448e+06	728616	761653	0	0	0	-	-	-	not significant
S493	SCRB1_MOUSE	20778	Scarb1	1.32068e+06	1.62835e+06	2.04008e+06	0	0	0	-	-	-	not significant
T332	STIP1_MOUSE	20867	Stip1	999301	1.1099e+06	1.04244e+06	0	0	0	-	-	-	not significant
S498	HELLS_MOUSE	15201	Hells	2.09379e+06	1.90029e+06	2.03663e+06	0	0	0	-	-	-	not significant
S211	DVL2_MOUSE	13543	Dvl2	1.78295e+06	1.03536e+06	1.40871e+06	0	0	0	-	-	-	not significant
S207	LCP2_MOUSE	16822	Lcp2	3.83122e+06	4.32773e+06	4.20536e+06	0	0	0	-	-	-	not significant
S818	NFAC2_MOUSE	18019	Nfatc2	1.96249e+06	2.12632e+06	2.25693e+06	0	0	0	-	-	-	not significant
T266	SIN3A_MOUSE	20466	Sin3a	641360	1.28548e+06	841107	0	0	0	-	-	-	not significant
S1143	SETD5_MOUSE	72895	Setd5	2.03259e+06	3.20478e+06	2.07676e+06	0	0	0	-	-	-	not significant
S1549	Q5XJV5_MOUSE	56406	Ncoa6	3.93094e+06	4.11041e+06	3.74315e+06	0	0	0	-	-	-	not significant
T751	SFR19_MOUSE	233208	Scaf1	1.82094e+06	1.75006e+06	1.44408e+06	0	0	0	-	-	-	not significant
S414	RABL6_MOUSE	227624	Rabl6	7.10091e+06	6.1273e+06	5.12051e+06	0	0	0	-	-	-	not significant
S970	FANCJ_MOUSE	237911	Brip1	1.8308e+06	2.10926e+06	2.2047e+06	0	0	0	-	-	-	not significant
S23	ACACA_MOUSE	107476	Acaca	1.54697e+06	1.99475e+06	1.65492e+06	0	0	0	-	-	-	not significant
S1488	ZZEF1_MOUSE	195018	Zzef1	6.55561e+06	5.77325e+06	5.74635e+06	0	0	0	-	-	-	not significant
T325	MDC1_MOUSE	240087	Mdc1	540526	485519	581762	0	0	0	-	-	-	not significant
S42	MRM3_MOUSE	67390	Mrm3	4.18928e+06	4.54806e+06	4.04351e+06	0	0	0	-	-	-	not significant
S829	URGCP_MOUSE	72046	Urgcp	1.29949e+06	1.57443e+06	1.47376e+06	0	0	0	-	-	-	not significant
S191	TTF2_MOUSE	74044	Ttf2	1.95189e+06	1.75474e+06	2.06103e+06	0	0	0	-	-	-	not significant
S73	IASPP_MOUSE	333654	Ppp1r13l	1.90876e+06	1.77057e+06	2.11429e+06	0	0	0	-	-	-	not significant
T333	TAF3_MOUSE	209361	Taf3	5.76163e+06	6.07885e+06	8.0956e+06	0	0	0	-	-	-	not significant
S669	TAF3_MOUSE	209361	Taf3	904119	802913	587678	0	0	0	-	-	-	not significant
S884	TUT7_MOUSE	214290	Tut7	2.85556e+06	2.10098e+06	1.96936e+06	0	0	0	-	-	-	not significant
S891	TUT7_MOUSE	214290	Tut7	2.85556e+06	2.10098e+06	1.96936e+06	0	0	0	-	-	-	not significant
S830	TUT7_MOUSE	214290	Tut7	516962	283449	429206	0	0	0	-	-	-	not significant
S720	CENPJ_MOUSE	219103	Cenpj	3.14201e+06	3.23788e+06	2.38101e+06	0	0	0	-	-	-	not significant
S203	NR2C1_MOUSE	22025	Nr2c1	1.57318e+06	1.55649e+06	1.51806e+06	0	0	0	-	-	-	not significant
T28	PHAR4_MOUSE	100169	Phactr4	1.26771e+06	2.01739e+06	1.61683e+06	0	0	0	-	-	-	not significant
S155	CDV3_MOUSE	321022	Cdv3	7.051e+06	1.0818e+07	6.17344e+06	0	0	0	-	-	-	not significant
T550	PDS5B_MOUSE	100710	Pds5b	4.84244e+06	5.63545e+06	5.97402e+06	0	0	0	-	-	-	not significant
S343	FOXN3_MOUSE	71375	Foxn3	1.06487e+06	906520	2.31756e+06	0	0	0	-	-	-	not significant
S558	KIF22_MOUSE	110033	Kif22	1.77981e+06	2.28247e+06	2.01781e+06	0	0	0	-	-	-	not significant
T264	Q3V113_MOUSE	68911	Pygo2	2.63239e+07	2.66726e+07	2.84893e+07	0	0	0	-	-	-	not significant
S11	Q3V113_MOUSE	68911	Pygo2	4.33685e+06	3.84926e+06	1.38253e+06	0	0	0	-	-	-	not significant
S333	CPZIP_MOUSE	226594	Rcsd1	3.72856e+06	2.14245e+06	2.2922e+06	0	0	0	-	-	-	not significant
S1066	Q3UZ64_MOUSE	18021	Nfatc3	2.61764e+06	5.13361e+06	2.68858e+06	0	0	0	-	-	-	not significant
S374	Q3UXQ3_MOUSE	21406	Tcf12	1.7872e+06	2.4166e+06	3.06712e+06	0	0	0	-	-	-	not significant
S375	Q3UXQ3_MOUSE	21406	Tcf12	1.7872e+06	2.4166e+06	3.06712e+06	0	0	0	-	-	-	not significant
S876	KDM7A_MOUSE	338523	Kdm7a	933924	1.31245e+06	1.5528e+06	0	0	0	-	-	-	not significant
T68	Q3UUT0_MOUSE	26987	Eif4e2	1.89662e+06	1.81318e+06	1.88856e+06	0	0	0	-	-	-	not significant
S12	ZNF48_MOUSE	233887	Znf48	2.06999e+06	1.57016e+06	1.55183e+06	0	0	0	-	-	-	not significant
S844	Q3UJB0_MOUSE	319322	Sf3b2	1.19428e+06	1.79094e+06	1.82993e+06	0	0	0	-	-	-	not significant
S1094	ZSWM8_MOUSE	268721	Zswim8	2.99628e+06	2.55957e+06	3.09457e+06	0	0	0	-	-	-	not significant
S1358	TNR6C_MOUSE	217351	Tnrc6c	1.88758e+06	1.71591e+06	1.64663e+06	0	0	0	-	-	-	not significant
S202	Q3UH85_MOUSE	329540	Nol4l	690184	597516	269664	0	0	0	-	-	-	not significant
S1230	RREB1_MOUSE	68750	Rreb1	4.76392e+06	4.48861e+06	4.79814e+06	0	0	0	-	-	-	not significant
S2090	BIG3_MOUSE	215821	Arfgef3	9.20904e+06	1.07628e+07	9.52756e+06	0	0	0	-	-	-	not significant
T289	Q3U3K9_MOUSE	11993	Aup1	1.78777e+06	2.23031e+06	2.039e+06	0	0	0	-	-	-	not significant
S764	F193B_MOUSE	212483	Fam193b	2.35663e+06	2.19294e+06	2.3702e+06	0	0	0	-	-	-	not significant
T203	TFPT_MOUSE	69714	Tfpt	1.75981e+06	1.66849e+06	1.6082e+06	0	0	0	-	-	-	not significant
S111	Q3TZY4_MOUSE	68875	Tmcc2	1.31125e+06	1.00993e+06	1.14598e+06	0	0	0	-	-	-	not significant
S142	MPP8_MOUSE	75339	Mphosph8	1.35967e+06	2.25622e+06	2.8497e+06	0	0	0	-	-	-	not significant
T89	Q3TPJ8_MOUSE	13427	Dync1i2	2.87666e+06	3.19766e+06	3.38123e+06	0	0	0	-	-	-	not significant
S81	Q3TPJ8_MOUSE	13427	Dync1i2	6.0002e+06	3.19752e+06	3.22192e+06	0	0	0	-	-	-	not significant
S195	Q3TGY1_MOUSE	66880	Rsrc1	1.18661e+06	478661	924221	0	0	0	-	-	-	not significant
T135	Q3TGS9_MOUSE	228998	Arfgap1	905950	988069	1.80192e+06	0	0	0	-	-	-	not significant
S29	Q3TE40_MOUSE	19891	Rpa2	1.87349e+06	3.00087e+06	2.16396e+06	0	0	0	-	-	-	not significant
S125	F219B_MOUSE	78323	Fam219b	858195	2.07492e+06	1.89925e+06	0	0	0	-	-	-	not significant
S127	F219B_MOUSE	78323	Fam219b	858195	2.07492e+06	1.89925e+06	0	0	0	-	-	-	not significant
S640	CDK12_MOUSE	69131	Cdk12	1.6765e+06	2.02378e+06	851099	0	0	0	-	-	-	not significant
S291	RBM15_MOUSE	229700	Rbm15	3.99074e+06	4.5373e+06	4.52859e+06	0	0	0	-	-	-	not significant
T2452	TRIO_MOUSE	223435	Trio	1.2037e+06	1.67295e+06	1.29117e+06	0	0	0	-	-	-	not significant
S2462	TRIO_MOUSE	223435	Trio	1.2037e+06	1.67295e+06	1.29117e+06	0	0	0	-	-	-	not significant
T260	LARP7_MOUSE	28036	Larp7	1.77856e+06	2.91376e+06	2.63711e+06	0	0	0	-	-	-	not significant
S223	E2AK2_MOUSE	19106	Eif2ak2	1.00427e+07	8.37517e+06	5.60449e+06	0	0	0	-	-	-	not significant
S360	IKZF1_MOUSE	22778	Ikzf1	773232	1.03096e+06	1.77335e+06	0	0	0	-	-	-	not significant
T549	MARK3_MOUSE	17169	Mark3	3.42062e+06	3.2948e+06	3.60283e+06	0	0	0	-	-	-	not significant
S46	UBA1_MOUSE	22201	Uba1	2.37257e+06	2.33399e+06	2.13586e+06	0	0	0	-	-	-	not significant
T974	RBBP6_MOUSE	19647	Rbbp6	4.32526e+06	1.95032e+06	2.27947e+06	0	0	0	-	-	-	not significant
S16	CASP7_MOUSE	12369	Casp7	3.04927e+06	3.28309e+06	2.88245e+06	0	0	0	-	-	-	not significant
T22	SMN_MOUSE	20595	Smn1	2.1187e+06	2.61031e+06	2.3481e+06	0	0	0	-	-	-	not significant
S143	RGS14_MOUSE	51791	Rgs14	2.39854e+06	2.18969e+06	1.41447e+06	0	0	0	-	-	-	not significant
S205	ETV6_MOUSE	14011	Etv6	3.61367e+06	3.34887e+06	3.50503e+06	0	0	0	-	-	-	not significant
T1801	WNK1_MOUSE	232341	Wnk1	1.05005e+06	1.22181e+06	1.03633e+06	0	0	0	-	-	-	not significant
S1297	WNK1_MOUSE	232341	Wnk1	5.49996e+06	1.88081e+06	1.1739e+06	0	0	0	-	-	-	not significant
S65	4EBP2_MOUSE	13688	Eif4ebp2	3.05195e+06	1.43966e+06	3.45253e+06	0	0	0	-	-	-	not significant
T690	RAD50_MOUSE	19360	Rad50	1.02967e+06	970771	623109	0	0	0	-	-	-	not significant
S648	ZHX1_MOUSE	22770	Zhx1	4.38897e+06	4.11056e+06	4.25976e+06	0	0	0	-	-	-	not significant
S24	IF4E_MOUSE	13684	Eif4e	1.23608e+06	1.39969e+06	1.57274e+06	0	0	0	-	-	-	not significant
T478	EST1A_MOUSE	103677	Smg6	571151	1.04339e+06	657078	0	0	0	-	-	-	not significant
S239	ESPL1_MOUSE	105988	Espl1	1.83226e+06	1.68551e+06	2.09659e+06	0	0	0	-	-	-	not significant
S1394	ESPL1_MOUSE	105988	Espl1	981329	1.13184e+06	825855	0	0	0	-	-	-	not significant
S868	KDM2A_MOUSE	225876	Kdm2a	3.36398e+06	3.17126e+06	3.09969e+06	0	0	0	-	-	-	not significant
S302	PCMD1_MOUSE	319263	Pcmtd1	4.03376e+06	3.9871e+06	4.05254e+06	0	0	0	-	-	-	not significant
S461	HPS5_MOUSE	246694	Hps5	1.78512e+06	2.39111e+06	5.30051e+06	0	0	0	-	-	-	not significant
S602	TB182_MOUSE	228140	Tnks1bp1	1.75372e+06	1.80733e+06	1.87249e+06	0	0	0	-	-	-	not significant
T3063	KMT2A_MOUSE	214162	Kmt2a	3.45775e+06	2.05599e+06	3.92356e+06	0	0	0	-	-	-	not significant
S632	3BP1_MOUSE	20401	Sh3bp1	3.88109e+06	3.4916e+06	3.34106e+06	0	0	0	-	-	-	not significant
S319	FAF1_MOUSE	14084	Faf1	2.14968e+06	2.33168e+06	2.08834e+06	0	0	0	-	-	-	not significant
S477	PMS2_MOUSE	18861	Pms2	1.57988e+06	1.63429e+06	1.32494e+06	0	0	0	-	-	-	not significant
S77	MSH6_MOUSE	17688	Msh6	1.62548e+06	1.28874e+06	1.75067e+06	0	0	0	-	-	-	not significant
S244	STOM_MOUSE	13830	Stom	1.20365e+06	1.4621e+06	1.96019e+06	0	0	0	-	-	-	not significant
T19	MCM4_MOUSE	17217	Mcm4	822662	1.41162e+06	606598	0	0	0	-	-	-	not significant
S51	LMNA_MOUSE	16905	Lmna	2.51396e+06	2.45469e+06	2.70279e+06	0	0	0	-	-	-	not significant
S211	ALD2_MOUSE	14187	Akr1b8	2.19077e+06	856584	1.10066e+06	0	0	0	-	-	-	not significant
S1038	CHD1_MOUSE	12648	Chd1	3.11188e+06	2.48945e+06	3.03534e+06	0	0	0	-	-	-	not significant
S405	NEDD1_MOUSE	17997	Nedd1	2.07028e+06	1.77041e+06	1.68205e+06	0	0	0	-	-	-	not significant
S1224	KIF4_MOUSE	16571	Kif4	1.88726e+06	1.50001e+06	2.35024e+06	0	0	0	-	-	-	not significant
S252	CTND1_MOUSE	12388	Ctnnd1	9.59588e+06	1.16418e+07	1.3094e+07	0	0	0	-	-	-	not significant
S315	PABP1_MOUSE	18458	Pabpc1	1.03422e+06	857363	902289	0	0	0	-	-	-	not significant
S585	KIF2A_MOUSE	16563	Kif2a	553591	2.23111e+06	2.46674e+06	0	0	0	-	-	-	not significant
S184	CEBPB_MOUSE	12608	Cebpb	2.7027e+07	3.0814e+07	2.38595e+07	0	0	0	-	-	-	not significant
S133	LYL1_MOUSE	17095	Lyl1	4.70266e+06	5.74533e+06	6.8056e+06	0	0	0	-	-	-	not significant
T368	FCGR1_MOUSE	14129	Fcgr1	2.81285e+06	2.62619e+06	3.09598e+06	0	0	0	-	-	-	not significant
S2162	TLN1_MOUSE	21894	Tln1	1.13229e+06	942484	1.3046e+06	0	0	0	-	-	-	not significant
S681	MCM3_MOUSE	17215	Mcm3	9.15822e+06	7.9042e+06	1.13567e+07	0	0	0	-	-	-	not significant
T159	IRF8_MOUSE	15900	Irf8	1.1671e+06	1.42303e+06	1.07883e+06	0	0	0	-	-	-	not significant
S162	IRF8_MOUSE	15900	Irf8	1.1671e+06	1.42303e+06	1.07883e+06	0	0	0	-	-	-	not significant
S184	LSP1_MOUSE	16985	Lsp1	7.31267e+06	6.69899e+06	4.09878e+06	0	0	0	-	-	-	not significant
S273	LSP1_MOUSE	16985	Lsp1	873550	1.03361e+06	1.01424e+06	0	0	0	-	-	-	not significant
S289	ATF2_MOUSE	11909	Atf2	5.65242e+06	5.68426e+06	4.7074e+06	0	0	0	-	-	-	not significant
T302	ATF2_MOUSE	11909	Atf2	5.65242e+06	5.68426e+06	4.7074e+06	0	0	0	-	-	-	not significant
S800	RB_MOUSE	19645	Rb1	2.97641e+06	3.82084e+06	3.43386e+06	0	0	0	-	-	-	not significant
S714	CSF1R_MOUSE	12978	Csf1r	2.32472e+06	2.28293e+06	1.96455e+06	0	0	0	-	-	-	not significant
T104	JUNB_MOUSE	16477	Junb	699225	3.45435e+06	3.08625e+06	0	0	0	-	-	-	not significant
S99	SODC_MOUSE	20655	Sod1	1.47479e+06	1.29683e+06	874044	0	0	0	-	-	-	not significant
S455	G6PI_MOUSE	14751	Gpi	1.19852e+06	1.54955e+06	1.65085e+06	0	0	0	-	-	-	not significant
S333	AATM_MOUSE	14719	Got2	853397	877436	737068	0	0	0	-	-	-	not significant
S45	ALDOC_MOUSE	11676	Aldoc	2.67292e+06	2.0653e+06	3.05545e+06	0	0	0	-	-	-	not significant
S102	HG2A_MOUSE	16149	Cd74	1.92039e+06	1.46183e+06	1.65067e+06	0	0	0	-	-	-	not significant
S672	PDE4A_MOUSE	18577	Pde4a	1.76007e+06	575714	721536	0	0	0	-	-	-	not significant
S4850	BIRC6_MOUSE	12211	Birc6	942873	1.21155e+06	1.5447e+06	0	0	0	-	-	-	not significant
S524	DTNB_MOUSE	13528	Dtnb	3.73074e+06	3.02445e+06	4.86616e+06	0	0	0	-	-	-	not significant
S565	SP3_MOUSE	20687	Sp3	1.88716e+06	1.83074e+06	1.45743e+06	0	0	0	-	-	-	not significant
S542	MTG8R_MOUSE	12396	Cbfa2t2	2.02023e+06	2.23042e+06	2.21027e+06	0	0	0	-	-	-	not significant
S137	PJA1_MOUSE	18744	Pja1	2.14435e+06	1.68504e+06	1.8019e+06	0	0	0	-	-	-	not significant
T182	MAPK5_MOUSE	17165	Mapkapk5	3.09943e+06	2.84461e+06	2.61226e+06	0	0	0	-	-	-	not significant
S666	SLK_MOUSE	20874	Slk	519993	610715	494510	0	0	0	-	-	-	not significant
S344	SLK_MOUSE	20874	Slk	2.46966e+06	2.34533e+06	1.81754e+06	0	0	0	-	-	-	not significant
S340	SLK_MOUSE	20874	Slk	2.45855e+06	3.08731e+06	3.11825e+06	0	0	0	-	-	-	not significant
S632	AP3D1_MOUSE	11776	Ap3d1	7.84059e+06	6.17858e+06	8.11193e+06	0	0	0	-	-	-	not significant
S634	AP3D1_MOUSE	11776	Ap3d1	7.84059e+06	6.17858e+06	8.11193e+06	0	0	0	-	-	-	not significant
S636	AP3D1_MOUSE	11776	Ap3d1	7.84059e+06	6.17858e+06	8.11193e+06	0	0	0	-	-	-	not significant
S278	NUDC_MOUSE	18221	Nudc	2.34789e+06	2.01701e+06	1.70819e+06	0	0	0	-	-	-	not significant
S403	INAR2_MOUSE	15976	Ifnar2	582533	504553	702444	0	0	0	-	-	-	not significant
S226	EXOC4_MOUSE	20336	Exoc4	1.20786e+06	2.11562e+06	1.52672e+06	0	0	0	-	-	-	not significant
S724	ATN1_MOUSE	13498	Atn1	1.70778e+06	3.55338e+06	3.76477e+06	0	0	0	-	-	-	not significant
S731	ATN1_MOUSE	13498	Atn1	1.70778e+06	3.55338e+06	3.76477e+06	0	0	0	-	-	-	not significant
S733	ATN1_MOUSE	13498	Atn1	1.70778e+06	3.55338e+06	3.76477e+06	0	0	0	-	-	-	not significant
S617	ATN1_MOUSE	13498	Atn1	7.47441e+06	7.15916e+06	7.58686e+06	0	0	0	-	-	-	not significant
S101	ATN1_MOUSE	13498	Atn1	2.59548e+06	1.61285e+06	1.82361e+06	0	0	0	-	-	-	not significant
S993	M3K5_MOUSE	26408	Map3k5	4.6275e+06	4.98765e+06	4.86337e+06	0	0	0	-	-	-	not significant
T151	VP26C_MOUSE	13185	Vps26c	994008	1.49953e+06	1.14997e+06	0	0	0	-	-	-	not significant
S1127	TCOF_MOUSE	21453	Tcof1	3.23525e+06	711861	3.6855e+06	0	0	0	-	-	-	not significant
S1071	TCOF_MOUSE	21453	Tcof1	3.4111e+06	3.89996e+06	3.97108e+06	0	0	0	-	-	-	not significant
S635	FOXM1_MOUSE	14235	Foxm1	1.1935e+06	1.77839e+06	1.51905e+06	0	0	0	-	-	-	not significant
S59	M3K4_MOUSE	26407	Map3k4	2.61941e+06	2.99206e+06	2.73955e+06	0	0	0	-	-	-	not significant
S77	M3K4_MOUSE	26407	Map3k4	2.61941e+06	2.99206e+06	2.73955e+06	0	0	0	-	-	-	not significant
S1044	KMT2B_MOUSE	75410	Kmt2b	466273	831468	705513	0	0	0	-	-	-	not significant
S121	J3QNW0_MOUSE	13433	Dnmt1	4.41854e+06	1.67077e+06	2.11832e+06	0	0	0	-	-	-	not significant
T865	J3QNK5_MOUSE	269003	Sap130	4.16826e+06	2.75746e+06	5.17723e+06	0	0	0	-	-	-	not significant
S1799	H9KV15_MOUSE	20658	Son	715757	1.35931e+06	1.37789e+06	0	0	0	-	-	-	not significant
S1805	H9KV15_MOUSE	20658	Son	715757	1.35931e+06	1.37789e+06	0	0	0	-	-	-	not significant
S150	H9KV15_MOUSE	20658	Son	2.08636e+06	2.09695e+06	1.67806e+06	0	0	0	-	-	-	not significant
S847	H9H9S3_MOUSE	24136	Zeb2	651783	673732	654163	0	0	0	-	-	-	not significant
S1302	H7BX08_MOUSE	67886	Camsap2	864503	602017	743228	0	0	0	-	-	-	not significant
S1201	H3BKF6_MOUSE	13047	Cux1	2.12415e+06	1.76837e+06	2.24573e+06	0	0	0	-	-	-	not significant
S279	H3BKB7_MOUSE	18987	Pou2f2	875640	1.86779e+06	484212	0	0	0	-	-	-	not significant
S902	H3BJZ3_MOUSE	216860	Neurl4	2.50173e+06	944677	2.09292e+06	0	0	0	-	-	-	not significant
S856	H3BJU7_MOUSE	16800	Arhgef2	840369	614147	697468	0	0	0	-	-	-	not significant
T517	G5E8R4_MOUSE	52036	Ppp6r3	646123	1.87097e+06	1.61366e+06	0	0	0	-	-	-	not significant
T518	G5E8R4_MOUSE	52036	Ppp6r3	646123	1.87097e+06	1.61366e+06	0	0	0	-	-	-	not significant
S926	G5E8I8_MOUSE	27967	Cherp	1.66997e+06	1.29757e+06	1.26547e+06	0	0	0	-	-	-	not significant
S39	G5E8D8_MOUSE	208104	Mlxip	4.58697e+06	3.77641e+06	3.03612e+06	0	0	0	-	-	-	not significant
T1165	AT2B1_MOUSE	67972	Atp2b1	2.96192e+06	3.04638e+06	3.54926e+06	0	0	0	-	-	-	not significant
S666	G3X9T5	-	-	1.41145e+06	2.18425e+06	2.22095e+06	0	0	0	-	-	-	not significant
S159	G3UZI2_MOUSE	56403	Syncrip	1.04401e+06	505817	927933	0	0	0	-	-	-	not significant
S284	G3UWZ0_MOUSE	217578	Baz1a	4.04029e+06	3.71945e+06	3.78552e+06	0	0	0	-	-	-	not significant
S873	G3UW83_MOUSE	72749	Tonsl	1.03606e+06	578594	837253	0	0	0	-	-	-	not significant
S1240	G3UVV3_MOUSE	240476	Zfp407	5.76501e+06	5.95551e+06	4.60036e+06	0	0	0	-	-	-	not significant
S1890	F8WI37_MOUSE	231051	Kmt2c	4.39222e+06	4.49106e+06	3.50225e+06	0	0	0	-	-	-	not significant
S549	F8WI26_MOUSE	214627	Tent4b	3.29543e+06	3.43545e+06	3.10043e+06	0	0	0	-	-	-	not significant
S265	F8WGT2_MOUSE	72649	Tmem209	3.42555e+06	3.72198e+06	3.84251e+06	0	0	0	-	-	-	not significant
S413	F8VQ11_MOUSE	58996	Arhgap23	2.66202e+06	2.31471e+06	2.5601e+06	0	0	0	-	-	-	not significant
S1125	ERCC6_MOUSE	319955	Ercc6	2.34274e+06	1.67182e+06	1.53173e+06	0	0	0	-	-	-	not significant
S182	F7AL76_MOUSE	67772	Chd8	670841	654973	596390	0	0	0	-	-	-	not significant
S782	F6WV21_MOUSE	75302	Asxl2	403109	983622	726371	0	0	0	-	-	-	not significant
S373	F6WV21_MOUSE	75302	Asxl2	4.53439e+06	6.3304e+06	6.58804e+06	0	0	0	-	-	-	not significant
S283	F6WIU1_MOUSE	215194	Kri1	3.48986e+06	1.69973e+06	4.58597e+06	0	0	0	-	-	-	not significant
S284	F6WIU1_MOUSE	215194	Kri1	3.48986e+06	1.69973e+06	4.58597e+06	0	0	0	-	-	-	not significant
S829	F6RJ39_MOUSE	56215	Acin1	6.20795e+06	5.80675e+06	5.52677e+06	0	0	0	-	-	-	not significant
S5	F2Z3U3_MOUSE	77300	Raph1	2.65897e+06	3.68778e+06	3.11688e+06	0	0	0	-	-	-	not significant
S17	F2Z3U3_MOUSE	77300	Raph1	2.65897e+06	3.68778e+06	3.11688e+06	0	0	0	-	-	-	not significant
S1289	E9QQ10_MOUSE	100986	Akap9	3.44277e+06	2.82257e+06	3.22792e+06	0	0	0	-	-	-	not significant
S1781	E9QNY8_MOUSE	50720	Sacs	631495	538972	1.969e+06	0	0	0	-	-	-	not significant
S137	E9QNN1_MOUSE	13211	Dhx9	2.10561e+07	1.82735e+07	1.92531e+07	0	0	0	-	-	-	not significant
S68	E9QN31_MOUSE	110109	Nop2	3.2839e+06	3.30345e+06	2.71707e+06	0	0	0	-	-	-	not significant
S546	E9QMN5_MOUSE	234366	Gatad2a	2.3609e+06	2.13745e+06	2.24589e+06	0	0	0	-	-	-	not significant
S1450	E9QLG3_MOUSE	29808	Mga	869359	875773	1.04337e+06	0	0	0	-	-	-	not significant
S294	E9QKK4_MOUSE	170772	Glcci1	3.7084e+06	3.73177e+06	4.10213e+06	0	0	0	-	-	-	not significant
S311	SC16A_MOUSE	227648	Sec16a	927896	1.31047e+06	1.20548e+06	0	0	0	-	-	-	not significant
T1821	E9QAI5_MOUSE	104146	Cad	1.12002e+06	1.11745e+06	958673	0	0	0	-	-	-	not significant
S975	E9QAI5_MOUSE	104146	Cad	2.63984e+06	2.48968e+06	2.3871e+06	0	0	0	-	-	-	not significant
S1455	E9QAF9_MOUSE	66860	Tanc1	1.97508e+06	1.84061e+06	2.16577e+06	0	0	0	-	-	-	not significant
S1456	E9QAF9_MOUSE	66860	Tanc1	1.97508e+06	1.84061e+06	2.16577e+06	0	0	0	-	-	-	not significant
S578	E9Q9S3_MOUSE	195434	Utp14b	1.38979e+06	1.25413e+06	1.37811e+06	0	0	0	-	-	-	not significant
S221	E9Q9S2_MOUSE	72140	Cep89	1.7507e+06	4.23436e+06	4.38929e+06	0	0	0	-	-	-	not significant
S1182	E9Q9E1_MOUSE	208643	Eif4g1	4.32797e+06	4.1764e+06	3.75063e+06	0	0	0	-	-	-	not significant
S433	E9Q9E1_MOUSE	208643	Eif4g1	6.67153e+06	6.32984e+06	7.48158e+06	0	0	0	-	-	-	not significant
S732	E9Q8V6_MOUSE	102442	Dennd4a	8.50241e+06	8.59886e+06	9.35594e+06	0	0	0	-	-	-	not significant
S614	E9Q8N5_MOUSE	76499	Clasp2	3.83272e+06	9.80861e+06	3.58101e+06	0	0	0	-	-	-	not significant
S518	E9Q8N0_MOUSE	19731	Rgl1	1.61863e+06	2.51589e+06	2.22805e+06	0	0	0	-	-	-	not significant
S278	E9Q8A3_MOUSE	107650	Pi4kb	1.09644e+06	1.02865e+06	1.80605e+06	0	0	0	-	-	-	not significant
S853	E9Q7S1_MOUSE	20402	Zfp106	1.24848e+06	1.22154e+06	1.1083e+06	0	0	0	-	-	-	not significant
S1017	E9Q7S1_MOUSE	20402	Zfp106	1.49329e+06	2.50802e+06	2.84036e+06	0	0	0	-	-	-	not significant
S1290	E9Q7S1_MOUSE	20402	Zfp106	2.17528e+06	1.84857e+06	1.95117e+06	0	0	0	-	-	-	not significant
S51	E9Q7Q3_MOUSE	59069	Tpm3	1.32642e+06	1.90141e+06	1.44385e+06	0	0	0	-	-	-	not significant
S53	E9Q7C4_MOUSE	215476	Prr14l	8.09565e+06	1.04986e+07	3.13867e+06	0	0	0	-	-	-	not significant
S448	E9Q777_MOUSE	219181	Akap11	5.64203e+06	3.68202e+06	5.12782e+06	0	0	0	-	-	-	not significant
S463	E9Q740_MOUSE	66661	Srp72	7.88948e+06	1.43665e+06	1.47734e+06	0	0	0	-	-	-	not significant
S933	E9Q6R7_MOUSE	22288	Utrn	428228	1.98965e+06	1.36557e+06	0	0	0	-	-	-	not significant
S2907	BD1L1_MOUSE	665775	Bod1l	2.62167e+06	2.62477e+06	2.91272e+06	0	0	0	-	-	-	not significant
S2912	BD1L1_MOUSE	665775	Bod1l	2.62167e+06	2.62477e+06	2.91272e+06	0	0	0	-	-	-	not significant
S598	SIMC1_MOUSE	319719	Simc1	3.22411e+06	4.84775e+06	4.61539e+06	0	0	0	-	-	-	not significant
S5563	E9Q616_MOUSE	66395	Ahnak	2.10004e+06	4.16462e+06	4.60133e+06	0	0	0	-	-	-	not significant
T5169	E9Q616_MOUSE	66395	Ahnak	1.2768e+06	1.70912e+06	1.85306e+06	0	0	0	-	-	-	not significant
S903	E9Q616_MOUSE	66395	Ahnak	2.99938e+06	969376	3.02854e+06	0	0	0	-	-	-	not significant
S730	E9Q616_MOUSE	66395	Ahnak	2.76378e+06	2.6201e+06	2.91398e+06	0	0	0	-	-	-	not significant
S5244	E9Q616_MOUSE	66395	Ahnak	1.35405e+06	1.55933e+06	1.38172e+06	0	0	0	-	-	-	not significant
S5198	E9Q616_MOUSE	66395	Ahnak	2.17175e+06	1.59569e+06	2.11994e+06	0	0	0	-	-	-	not significant
S5137	E9Q616_MOUSE	66395	Ahnak	1.76872e+06	1.11375e+06	1.29875e+06	0	0	0	-	-	-	not significant
S3253	E9Q616_MOUSE	66395	Ahnak	1.46634e+06	1.5197e+06	1.74237e+06	0	0	0	-	-	-	not significant
S290	E9Q616_MOUSE	66395	Ahnak	1.45139e+06	1.33822e+06	1.47443e+06	0	0	0	-	-	-	not significant
S142	E9Q5Y1_MOUSE	12748	Clk2	1.39032e+06	1.61129e+06	1.22967e+06	0	0	0	-	-	-	not significant
S1818	SETD2_MOUSE	235626	Setd2	1.01625e+06	1.20697e+06	1.08857e+06	0	0	0	-	-	-	not significant
S1819	SETD2_MOUSE	235626	Setd2	1.01625e+06	1.20697e+06	1.08857e+06	0	0	0	-	-	-	not significant
S13	E9Q4Y5_MOUSE	66923	Pbrm1	5.64918e+06	4.97704e+06	4.12038e+06	0	0	0	-	-	-	not significant
S14	E9Q4Y5_MOUSE	66923	Pbrm1	2.06097e+06	1.69172e+06	1.43148e+06	0	0	0	-	-	-	not significant
S16	E9Q4Y5_MOUSE	66923	Pbrm1	2.06097e+06	1.69172e+06	1.43148e+06	0	0	0	-	-	-	not significant
S934	E9Q4Y5_MOUSE	66923	Pbrm1	2.08877e+06	2.18465e+06	1.66456e+06	0	0	0	-	-	-	not significant
S178	E9Q4Y5_MOUSE	66923	Pbrm1	2.69882e+06	2.47221e+06	2.52987e+06	0	0	0	-	-	-	not significant
S859	E9Q4F8_MOUSE	77087	Ankrd11	618657	765059	650859	0	0	0	-	-	-	not significant
S179	E9Q496_MOUSE	67023	Use1	1.9375e+06	2.47352e+06	1.92291e+06	0	0	0	-	-	-	not significant
S241	E9Q3Z5_MOUSE	225115	Svil	1.68635e+06	1.49959e+06	1.5585e+06	0	0	0	-	-	-	not significant
S833	E9Q3E2_MOUSE	104027	Synpo	305228	765338	726049	0	0	0	-	-	-	not significant
S1824	CE350_MOUSE	74081	Cep350	941934	1.2065e+06	921456	0	0	0	-	-	-	not significant
S392	E9Q2Y3_MOUSE	16151	Ikbkg	1.37635e+06	1.74896e+06	1.57745e+06	0	0	0	-	-	-	not significant
S718	E9Q2I1_MOUSE	12725	Clcn3	1.86484e+06	1.91863e+06	1.69728e+06	0	0	0	-	-	-	not significant
S1543	E9Q2H1_MOUSE	70790	Ubr5	955688	1.18802e+06	756498	0	0	0	-	-	-	not significant
S42	E9Q226_MOUSE	227210	Ccnyl1	3.48917e+06	3.9547e+06	3.4288e+06	0	0	0	-	-	-	not significant
T375	I2BP2_MOUSE	270110	Irf2bp2	780002	896512	730968	0	0	0	-	-	-	not significant
S392	I2BP2_MOUSE	270110	Irf2bp2	780002	896512	730968	0	0	0	-	-	-	not significant
S1727	CHD2_MOUSE	244059	Chd2	1.74486e+06	1.25818e+06	841160	0	0	0	-	-	-	not significant
S346	E9PZ97_MOUSE	12144	Blm	1.93448e+06	1.36999e+06	1.57595e+06	0	0	0	-	-	-	not significant
S377	E9PZ12_MOUSE	14924	Magi1	3.54295e+06	2.49104e+06	991893	0	0	0	-	-	-	not significant
T1555	PRR12_MOUSE	233210	Prr12	2.22063e+06	2.08308e+06	1.83245e+06	0	0	0	-	-	-	not significant
S1562	PRR12_MOUSE	233210	Prr12	2.22063e+06	2.08308e+06	1.83245e+06	0	0	0	-	-	-	not significant
S96	PARP4_MOUSE	328417	Parp4	1.67806e+06	1.3594e+06	1.67182e+06	0	0	0	-	-	-	not significant
S1110	SET1A_MOUSE	233904	Setd1a	1.27561e+06	1.43259e+06	1.95577e+06	0	0	0	-	-	-	not significant
T246	E9PWW9_MOUSE	233532	Rsf1	1.85554e+06	2.36878e+06	3.62189e+06	0	0	0	-	-	-	not significant
S580	E9PWB1_MOUSE	102693	Phldb1	5.46884e+06	6.63995e+06	7.65401e+06	0	0	0	-	-	-	not significant
S115	E9PW85_MOUSE	101568	Vrk3	6.63369e+06	4.28064e+06	2.49301e+06	0	0	0	-	-	-	not significant
S1342	KI67_MOUSE	17345	Mki67	795656	1.17247e+06	1.01381e+06	0	0	0	-	-	-	not significant
S1000	KI67_MOUSE	17345	Mki67	6.88103e+06	6.79476e+06	6.52905e+06	0	0	0	-	-	-	not significant
S173	E9PVA2_MOUSE	101867	Rrp8	1.75541e+06	1.81377e+06	2.1804e+06	0	0	0	-	-	-	not significant
S2602	E9PV45_MOUSE	329908	Usp24	1.28816e+07	5.92646e+06	6.19872e+06	0	0	0	-	-	-	not significant
S831	E9PUF7_MOUSE	16801	Arhgef1	2.57647e+06	6.03155e+06	2.31277e+06	0	0	0	-	-	-	not significant
S876	E9PUA3_MOUSE	232227	Iqsec1	1.43002e+06	1.57408e+06	1.13178e+06	0	0	0	-	-	-	not significant
S616	E0CX53_MOUSE	210789	Tbc1d4	4.18693e+06	4.07027e+06	4.34173e+06	0	0	0	-	-	-	not significant
S577	E0CX53_MOUSE	210789	Tbc1d4	1.03267e+06	865243	867162	0	0	0	-	-	-	not significant
S486	D3Z5N5_MOUSE	18711	Pikfyve	2.18753e+06	2.25466e+06	2.27235e+06	0	0	0	-	-	-	not significant
S752	D3Z5I9_MOUSE	381626	Rbm33	1.29334e+07	1.38077e+07	1.21749e+07	0	0	0	-	-	-	not significant
S40	D3Z4K8_MOUSE	12916	Crem	978028	1.12633e+06	761353	0	0	0	-	-	-	not significant
S463	D3YZC9_MOUSE	22668	Sf1	1.00234e+06	991534	871813	0	0	0	-	-	-	not significant
S227	D3YZ86_MOUSE	74760	Rab3il1	1.68476e+06	2.32098e+06	2.28223e+06	0	0	0	-	-	-	not significant
T39	OSBL8_MOUSE	237542	Osbpl8	1.62393e+06	1.35859e+06	1.88292e+06	0	0	0	-	-	-	not significant
S532	PDZD8_MOUSE	107368	Pdzd8	892184	844718	377292	0	0	0	-	-	-	not significant
S9	B8JJF6_MOUSE	77116	Mtmr2	4.13836e+06	4.09648e+06	3.68112e+06	0	0	0	-	-	-	not significant
S228	RBM25_MOUSE	67039	Rbm25	1.18044e+06	1.59027e+06	1.29141e+06	0	0	0	-	-	-	not significant
S394	B2RW11_MOUSE	545554	Ankrd34a	1.03559e+06	665007	942435	0	0	0	-	-	-	not significant
T1778	B2RUQ2_MOUSE	207806	Usf3	1.15576e+06	2.55458e+07	1.09996e+06	0	0	0	-	-	-	not significant
T769	B2RT41_MOUSE	216345	Zfc3h1	2.49288e+06	3.46397e+06	3.94454e+06	0	0	0	-	-	-	not significant
S42	RRN3_MOUSE	106298	Rrn3	1.56813e+06	1.10254e+06	1.11723e+06	0	0	0	-	-	-	not significant
S655	B2RQG2_MOUSE	213109	Phf3	1.19714e+06	1.23457e+06	1.16616e+06	0	0	0	-	-	-	not significant
S656	B2RQG2_MOUSE	213109	Phf3	1.19714e+06	1.23457e+06	1.16616e+06	0	0	0	-	-	-	not significant
S839	B2RQG2_MOUSE	213109	Phf3	1.21119e+06	740110	978759	0	0	0	-	-	-	not significant
S1227	UBP42_MOUSE	76800	Usp42	2.3416e+06	3.13779e+06	2.41806e+06	0	0	0	-	-	-	not significant
S1230	UBP42_MOUSE	76800	Usp42	2.3416e+06	3.13779e+06	2.41806e+06	0	0	0	-	-	-	not significant
S1234	UBP42_MOUSE	76800	Usp42	1.22857e+06	1.2598e+06	1.44903e+06	0	0	0	-	-	-	not significant
S278	B1AUB9_MOUSE	18027	Nfia	2.37379e+06	2.06709e+06	2.17317e+06	0	0	0	-	-	-	not significant
S236	B1AUB9_MOUSE	18027	Nfia	1.32626e+06	1.13857e+06	993992	0	0	0	-	-	-	not significant
S840	B1AST8_MOUSE	17776	Mast2	594550	742948	572511	0	0	0	-	-	-	not significant
S1366	B1AST8_MOUSE	17776	Mast2	910692	1.45427e+06	1.87419e+06	0	0	0	-	-	-	not significant
S6922	B1ARU4_MOUSE	11426	Macf1	441598	693243	946335	0	0	0	-	-	-	not significant
S340	B1AR09_MOUSE	246198	Mllt6	840833	850784	1.28304e+06	0	0	0	-	-	-	not significant
S256	B0R077_MOUSE	56364	Zmym3	1.18129e+06	2.79893e+06	636268	0	0	0	-	-	-	not significant
S1240	DEN4C_MOUSE	329877	Dennd4c	2.27136e+06	1.5613e+06	1.40269e+06	0	0	0	-	-	-	not significant
S1106	BLT3B_MOUSE	-	-	1.85981e+06	2.01341e+06	1.70882e+06	0	0	0	-	-	-	not significant
S76	A2CF83_MOUSE	104457	0610010K14Rik	1.29623e+06	1.24142e+06	550033	0	0	0	-	-	-	not significant
S38	A2CEK1_MOUSE	230500	Efcab7	428341	601426	665324	0	0	0	-	-	-	not significant
T119	A2AVJ7_MOUSE	81910	Rrbp1	3.23801e+06	1.90859e+06	1.6176e+07	0	0	0	-	-	-	not significant
S145	A2AV19_MOUSE	227715	Exosc2	596419	593280	571486	0	0	0	-	-	-	not significant
S19	A2AUD5_MOUSE	66314	Tpd52l2	970458	890284	762856	0	0	0	-	-	-	not significant
T51	A2AQE9_MOUSE	11909	Atf2	4.64634e+06	4.79202e+06	4.53675e+06	0	0	0	-	-	-	not significant
S72	A2AQE9_MOUSE	11909	Atf2	967983	801572	719741	0	0	0	-	-	-	not significant
S4883	A2ANY6_MOUSE	100019	Mdn1	1.35996e+06	1.11124e+06	1.65075e+06	0	0	0	-	-	-	not significant
T4888	A2ANY6_MOUSE	100019	Mdn1	3.74909e+06	2.6546e+06	3.28838e+06	0	0	0	-	-	-	not significant
T4203	A2ANY6_MOUSE	100019	Mdn1	813633	594659	824029	0	0	0	-	-	-	not significant
S4036	A2ANY6_MOUSE	100019	Mdn1	1.80946e+06	1.51199e+06	1.96606e+06	0	0	0	-	-	-	not significant
S2715	UBR4_MOUSE	69116	Ubr4	2.02059e+06	2.78166e+06	2.86425e+06	0	0	0	-	-	-	not significant
S2719	UBR4_MOUSE	69116	Ubr4	2.02059e+06	2.78166e+06	2.86425e+06	0	0	0	-	-	-	not significant
T2721	UBR4_MOUSE	69116	Ubr4	2.02059e+06	2.78166e+06	2.86425e+06	0	0	0	-	-	-	not significant
S134	A2ALR5_MOUSE	170707	Usp48	1.93387e+06	2.45246e+06	2.52579e+06	0	0	0	-	-	-	not significant
S96	DCA10_MOUSE	242418	Dcaf10	1.78418e+06	1.18778e+06	1.51804e+06	0	0	0	-	-	-	not significant
S34	A2AJI1_MOUSE	245877	Map7d1	3.29912e+06	3.15296e+06	2.59296e+06	0	0	0	-	-	-	not significant
S403	A2AI52_MOUSE	84092	Usp8	1.84054e+06	1.77301e+06	2.37767e+06	0	0	0	-	-	-	not significant
S501	TPRN_MOUSE	97031	Tprn	1.26268e+06	1.42341e+06	1.03583e+06	0	0	0	-	-	-	not significant
S617	A2AEW9_MOUSE	54645	Gripap1	2.92072e+06	3.29034e+06	2.89377e+06	0	0	0	-	-	-	not significant
S438	A2AES5_MOUSE	54644	Otud5	1.91135e+06	2.10673e+06	2.41055e+06	0	0	0	-	-	-	not significant
S500	TBKB1_MOUSE	73174	Tbkbp1	2.39479e+06	3.66631e+06	2.49477e+06	0	0	0	-	-	-	not significant
S3230	SZT2_MOUSE	230676	Szt2	1.05629e+06	1.3573e+06	1.36654e+06	0	0	0	-	-	-	not significant
S506	A2A842_MOUSE	269587	Epb41	1.40876e+06	1.05813e+06	914806	0	0	0	-	-	-	not significant
S743	A2A7B5_MOUSE	110593	Prdm2	4.78978e+06	5.03588e+06	6.54997e+06	0	0	0	-	-	-	not significant
S267	A2A716_MOUSE	71240	Osbpl7	9.89399e+06	9.43024e+06	7.82669e+06	0	0	0	-	-	-	not significant
T623	BIG2_MOUSE	99371	Arfgef2	2.88472e+06	2.46303e+06	2.96324e+06	0	0	0	-	-	-	not significant
T77	CUL4B_MOUSE	72584	Cul4b	1.89249e+06	1.7205e+06	1.7839e+06	0	0	0	-	-	-	not significant
S14	A0A804C8S8_MOUSE	231003	Klhl17	2.37107e+06	2.20386e+06	1.22375e+06	0	0	0	-	-	-	not significant
T540	A0A7N9VR94_MOUSE	100041194	Ahnak2	2.24565e+06	2.22782e+06	1.19625e+06	0	0	0	-	-	-	not significant
S2766	A0A7N9VR94_MOUSE	100041194	Ahnak2	1.37993e+06	1.2135e+06	1.34917e+06	0	0	0	-	-	-	not significant
S2706	A0A7N9VR94_MOUSE	100041194	Ahnak2	582093	561367	665963	0	0	0	-	-	-	not significant
S237	A0A6I8MX08_MOUSE	108686	Ccdc88a	2.48951e+06	2.61451e+06	2.51922e+06	0	0	0	-	-	-	not significant
S180	A0A5H1ZRL4_MOUSE	237886	Slfn9	920632	894944	1.0253e+06	0	0	0	-	-	-	not significant
S289	A0A5F8MQ25_MOUSE	71474	Ppp6r2	1.00944e+06	994731	1.16892e+06	0	0	0	-	-	-	not significant
S524	A0A5F8MPZ2_MOUSE	16593	Klc1	6.57309e+06	1.07708e+07	1.17661e+07	0	0	0	-	-	-	not significant
S679	A0A494BBI9_MOUSE	14218	Sh3pxd2a	1.29987e+06	1.23268e+06	1.23448e+06	0	0	0	-	-	-	not significant
S191	A0A494BB75_MOUSE	226757	Wdr26	1.23691e+06	1.23078e+06	1.41715e+06	0	0	0	-	-	-	not significant
S1101	A0A494BB08_MOUSE	78317	Ccdc88b	1.27468e+06	915235	1.17395e+06	0	0	0	-	-	-	not significant
S10	A0A494B933_MOUSE	18938	Ppp1r14b	1.68902e+06	1.16557e+06	1.65214e+06	0	0	0	-	-	-	not significant
S895	A0A3B2WBH9_MOUSE	21873	Tjp2	701407	1.06021e+06	817585	0	0	0	-	-	-	not significant
S440	A0A3B2WAQ7_MOUSE	224650	Anks1	1.55159e+06	1.57417e+06	1.68924e+06	0	0	0	-	-	-	not significant
S1060	A0A338P6U8_MOUSE	239985	Arid1b	1.40562e+06	2.07406e+06	1.74638e+06	0	0	0	-	-	-	not significant
S649	A0A338P6N4_MOUSE	224273	Crybg3	3.69808e+06	3.23967e+06	3.82127e+06	0	0	0	-	-	-	not significant
S409	A0A338P697_MOUSE	208146	Yeats2	9.17079e+06	9.45235e+06	9.57781e+06	0	0	0	-	-	-	not significant
S754	A0A2R8VK76_MOUSE	94230	Cpsf1	3.47391e+06	3.07168e+06	2.02184e+06	0	0	0	-	-	-	not significant
S58	A0A2I3BRL8_MOUSE	652988	Gm7324	2.49992e+06	2.3891e+06	2.30048e+06	0	0	0	-	-	-	not significant
S215	A0A2I3BR78_MOUSE	72662	Dis3	1.13127e+06	1.05506e+06	1.06852e+06	0	0	0	-	-	-	not significant
S77	A0A2I3BPQ5_MOUSE	67302	Zc3h13	1.75321e+06	2.15415e+06	755722	0	0	0	-	-	-	not significant
S418	A0A1Y7VNP1_MOUSE	76559	Atg2b	8.31494e+06	4.50919e+06	7.13296e+06	0	0	0	-	-	-	not significant
S1428	A0A1Y7VMH7_MOUSE	77480	Kidins220	4.90547e+06	6.00946e+06	2.5366e+06	0	0	0	-	-	-	not significant
S182	A0A1W2P714_MOUSE	72580	Zup1	813744	849086	863633	0	0	0	-	-	-	not significant
S912	A0A1W2P6X3_MOUSE	57778	Fmnl1	1.27667e+06	902521	936608	0	0	0	-	-	-	not significant
T8363	A0A1L1STC6_MOUSE	64009	Syne1	3.45435e+06	3.75417e+06	4.07899e+06	0	0	0	-	-	-	not significant
S136	A0A1L1SRC3_MOUSE	67010	Rbm7	2.65781e+07	2.61712e+07	2.77736e+07	0	0	0	-	-	-	not significant
S588	A0A1L1SQ61_MOUSE	333193	Proser3	1.57394e+06	1.53439e+06	963125	0	0	0	-	-	-	not significant
S372	A0A1D5RLV0_MOUSE	73473	Iws1	1.04655e+06	1.33421e+06	2.24784e+06	0	0	0	-	-	-	not significant
S584	A0A1B0GSU0_MOUSE	69748	Aldh16a1	1.46208e+06	1.47309e+06	1.19133e+06	0	0	0	-	-	-	not significant
S616	A0A1B0GRM0_MOUSE	19651	Rbl2	1.48528e+06	1.58308e+06	1.79818e+06	0	0	0	-	-	-	not significant
T4504	A0A171EBL2_MOUSE	672511	Rnf213	2.97547e+06	3.80411e+06	3.475e+06	0	0	0	-	-	-	not significant
S2233	A0A171EBL2_MOUSE	672511	Rnf213	2.62348e+06	2.86429e+06	3.87058e+06	0	0	0	-	-	-	not significant
S141	A0A140LIQ1_MOUSE	57752	Tacc2	1.92542e+06	1.7592e+06	1.49323e+06	0	0	0	-	-	-	not significant
S21	A0A0U1RP20_MOUSE	21366	Slc6a6	1.04947e+07	9.23043e+06	9.38942e+06	0	0	0	-	-	-	not significant
S25	A0A0U1RP20_MOUSE	21366	Slc6a6	1.04947e+07	1.08203e+07	1.20479e+07	0	0	0	-	-	-	not significant
S1190	A0A0U1RNR6_MOUSE	233905	Zfp646	4.6043e+06	8.66055e+06	7.62405e+06	0	0	0	-	-	-	not significant
S793	A0A0R4J1L0_MOUSE	51789	Tnk2	832680	1.04637e+06	735348	0	0	0	-	-	-	not significant
S1829	A0A0R4J1I6_MOUSE	54563	Nup210	3.29007e+06	2.32811e+06	2.60465e+06	0	0	0	-	-	-	not significant
S63	A0A0R4J0U8_MOUSE	98685	Trmt1l	1.07588e+07	1.24759e+07	1.3515e+07	0	0	0	-	-	-	not significant
S241	A0A0R4J0T8_MOUSE	66251	Arfgap3	2.2049e+06	2.07473e+06	2.25929e+06	0	0	0	-	-	-	not significant
S757	A0A0R4J0B3_MOUSE	22241	Ulk1	1.33127e+06	1.53908e+06	1.12536e+06	0	0	0	-	-	-	not significant
S483	A0A0R4IZZ6_MOUSE	55935	Fnbp4	2.70329e+06	2.81072e+06	3.18163e+06	0	0	0	-	-	-	not significant
S489	A0A0R4IZZ6_MOUSE	55935	Fnbp4	2.70329e+06	2.81072e+06	3.18163e+06	0	0	0	-	-	-	not significant
S866	A0A0N4SW93_MOUSE	74741	C2cd5	1.34223e+06	1.45699e+06	1.05772e+06	0	0	0	-	-	-	not significant
S208	A0A0J9YUH4_MOUSE	72313	Fryl	1.58873e+06	1.87653e+06	1.6063e+06	0	0	0	-	-	-	not significant
S107	A0A0G2JF44_MOUSE	67286	Ift22	626196	622677	782711	0	0	0	-	-	-	not significant
S98	A0A0G2JEC2_MOUSE	17260	Mef2c	2.34947e+06	3.31275e+06	3.51375e+06	0	0	0	-	-	-	not significant
S110	A0A0G2JEC2_MOUSE	17260	Mef2c	2.34947e+06	3.31275e+06	3.51375e+06	0	0	0	-	-	-	not significant
S1243	A0A0A6YY83_MOUSE	54216	Pcdh7	3.40707e+06	3.01624e+06	3.08135e+06	0	0	0	-	-	-	not significant
S348	A0A0A6YWM7_MOUSE	22258	Usp4	2.26008e+06	1.58195e+06	1.49183e+06	0	0	0	-	-	-	not significant
S77	A0A0A0MQA5_MOUSE	22145	Tuba4a	1.48285e+06	1.11728e+06	1.13503e+06	0	0	0	-	-	-	not significant
S369	A0A0A0MQA5_MOUSE	22145	Tuba4a	1.87616e+06	2.08251e+06	1.87175e+06	0	0	0	-	-	-	not significant
S2318	A0A0A0MQ73_MOUSE	381022	Kmt2d	2.13085e+07	2.30794e+07	2.26965e+07	0	0	0	-	-	-	not significant
S1107	A0A0A0MQ73_MOUSE	381022	Kmt2d	1.17126e+06	1.35574e+06	987409	0	0	0	-	-	-	not significant
S157	A0A087WQ86	-	-	1.65373e+06	2.14508e+06	3.58228e+06	0	0	0	-	-	-	not significant
T2821	A0A087WNL7_MOUSE	100043597	Srcap	1.59589e+06	1.74759e+06	1.54872e+06	0	0	0	-	-	-	not significant
S297	BUD13_MOUSE	215051	Bud13	1.27594e+06	893154	731559	4.79926e+07	3.81454e+07	4.11188e+07	49.554	0.000172456	0.0028358	Up
S272	F8WIP8_MOUSE	20750	Spp1	2.33001e+06	979265	1.62336e+06	5.762e+07	5.82858e+07	6.22449e+07	40.7161	1.81069e-06	0.000352965	Up
S261	TLS1_MOUSE	227707	BC005624	3.63905e+06	2.81186e+07	1.13361e+07	385964698	324959904	2.9843e+08	26.6971	0.000313442	0.00373514	Up
S953	RTN4_MOUSE	68585	Rtn4	1.39988e+06	916885	762030	21114116	1.74978e+07	1.47737e+07	19.5833	0.000897616	0.00648573	Up
S578	TBCD5_MOUSE	72238	Tbc1d5	3.51941e+06	979968	566257	34100044	2.77402e+07	2.26705e+07	18.7463	0.00160037	0.00910685	Up
S552	CRY2_MOUSE	12953	Cry2	8.35505e+06	3.51557e+06	1.70669e+06	78128400	7.40787e+07	6.39454e+07	17.915	0.000140033	0.00250706	Up
S73	JUN_MOUSE	16476	Jun	8.35505e+06	3.51557e+06	1.70669e+06	78128400	7.40787e+07	6.39454e+07	17.915	0.000140033	0.00250706	Up
T187	K3W4Q8_MOUSE	12215	Bsg	1.1097e+07	1.49224e+07	1.52507e+07	217661286	2.18065e+08	2.15327e+08	17.8741	3.30988e-08	0.000101	Up
S24	E0CY61_MOUSE	108943	Trmt10a	1.5878e+07	6.71749e+06	3.65072e+06	136888932	1.18274e+08	9.55001e+07	15.042	0.00103286	0.00699197	Up
S13	ZKSC1_MOUSE	74570	Zkscan1	4.365e+07	1.48033e+07	6.08497e+06	298945856	2.76226e+08	2.42257e+08	14.2345	0.000228458	0.00326774	Up
S673	ARHG7_MOUSE	54126	Arhgef7	5.46306e+06	2.08851e+06	1.53597e+06	48488460	3.52369e+07	2.87562e+07	13.9399	0.00452573	0.0171453	Up
T59	TACC3_MOUSE	21335	Tacc3	6.92616e+06	8.21138e+06	8.10712e+06	98125784	9.45924e+07	9.20626e+07	13.8745	1.96029e-06	0.000363289	Up
S22	LMNA_MOUSE	16905	Lmna	5.27011e+07	1.67115e+07	7.50967e+06	333664217	3.11061e+08	2.7466e+08	13.4288	0.000207628	0.00311552	Up
S406	MEF2A_MOUSE	17258	Mef2a	7.88379e+06	2.18387e+06	1.71371e+06	5.10812e+07	4.21189e+07	3.33467e+07	12.0747	0.00223657	0.0110332	Up
S723	RBM10_MOUSE	236732	Rbm10	1.10699e+07	5.90656e+06	2.84012e+06	84653202	6.4577e+07	5.32058e+07	11.5178	0.00312956	0.0134542	Up
S178	SQSTM_MOUSE	18412	Sqstm1	2.07571e+06	1.75457e+06	1.91688e+06	19399112	1.92178e+07	1.92031e+07	11.3751	4.41885e-08	0.000101	Up
S614	A2A842_MOUSE	269587	Epb41	1.1268e+07	3.51303e+06	1.66106e+06	60919010	4.71733e+07	4.25332e+07	10.2971	0.00197197	0.0101898	Up
S11	RCC1_MOUSE	100088	Rcc1	1.97293e+07	6.56317e+06	6.09635e+06	1.15456e+08	9.69284e+07	8.39509e+07	10.2961	0.000984617	0.00683121	Up
S101	HEM6_MOUSE	12892	Cpox	1.57367e+07	5.5607e+06	3.31836e+06	83367162	6.92223e+07	6.266e+07	9.83621	0.000883279	0.00642274	Up
S438	A2AEM2_MOUSE	229725	Clcc1	2.27777e+06	644521	693864	1.22894e+07	1.07222e+07	8.28624e+06	9.73494	0.00191936	0.0100716	Up
S22	TB10B_MOUSE	68449	Tbc1d10b	1.33927e+07	7.45406e+06	6.4614e+06	86291032	7.38121e+07	6.89553e+07	9.46324	0.000296695	0.00364286	Up
S159	PO121_MOUSE	107939	Pom121	4.49954e+06	2.0492e+06	1.5644e+06	24738422	2.23696e+07	2.09477e+07	9.4498	0.000149292	0.00257932	Up
S358	E9PYI8_MOUSE	59025	Usp14	7.82521e+06	6.04194e+06	4.024e+06	5.66203e+07	4.61294e+07	4.35494e+07	9.23969	0.00053802	0.00490029	Up
S303	SRSF6_MOUSE	67996	Srsf6	3.89949e+07	1.68177e+07	1.05375e+07	2.16855e+08	1.69747e+08	1.52087e+08	9.14458	0.00173731	0.0095101	Up
S199	PHF6_MOUSE	70998	Phf6	2.01121e+06	2.22055e+07	2.55794e+07	1.67151e+08	1.20115e+08	1.1202e+08	9.13772	0.00326278	0.0138704	Up
T124	TSSC4_MOUSE	56844	Tssc4	2.75119e+07	1.03988e+07	5.06897e+06	133650068	1.09195e+08	9.75152e+07	8.90922	0.0013432	0.00817241	Up
S1331	A2AVJ7_MOUSE	81910	Rrbp1	2.24629e+06	2.28397e+06	2.84042e+06	26088552	2.37662e+06	2.83774e+07	8.73925	0.113671	0.184178	not significant
Y835	E9Q616_MOUSE	66395	Ahnak	1.7414e+06	817805	928147	8.22729e+06	9.41813e+06	9.20505e+06	8.67615	5.10089e-05	0.00174397	Up
S284	F8WIP8_MOUSE	20750	Spp1	4.74123e+06	5.23545e+06	6.36472e+06	3.98905e+07	4.21582e+07	4.16009e+07	8.56637	7.2774e-07	0.000268365	Up
S573	Q1MX42_MOUSE	18753	Prkcd	2.95107e+06	3.32496e+06	3.08967e+06	23949491	2.20904e+07	2.3651e+07	8.42408	5.4481e-06	0.000592978	Up
T2056	SRRM2_MOUSE	75956	Srrm2	1.00401e+07	2.93963e+06	2.89081e+06	42739228	3.51971e+07	3.84652e+07	8.24699	0.000416143	0.00424301	Up
S83	HNRPD_MOUSE	11991	Hnrnpd	4.85277e+06	1.50075e+07	1.3872e+07	62492914	8.94838e+07	8.52272e+07	7.98459	0.00129695	0.00797669	Up
T1048	F8VQC9_MOUSE	218756	Slc4a7	543753	785847	461943	3.74501e+06	3.75956e+06	4.9488e+06	7.87182	0.000813911	0.00608613	Up
S421	TAOK1_MOUSE	216965	Taok1	2.42548e+06	1.52309e+06	1.09591e+06	13165531	1.15874e+07	1.01895e+07	7.81789	0.00046591	0.00455368	Up
S13	SELN_MOUSE	74777	Selenon	1.19012e+07	5.77408e+06	3.82559e+06	65277869	3.64331e+07	4.42404e+07	7.65482	0.00956489	0.0286029	Up
S145	NAV1_MOUSE	215690	Nav1	2.85263e+06	3.11845e+06	3.35637e+06	2947226	2.86046e+06	5.72521e+07	7.62723	0.370042	0.462078	not significant
S616	E9PUK6_MOUSE	51796	Srrm1	1.11309e+08	5.75412e+07	3.04269e+07	512360534	4.02712e+08	3.5251e+08	7.17025	0.00241363	0.0115643	Up
S2716	UBR4_MOUSE	69116	Ubr4	5.57943e+06	1.46312e+06	2.50816e+06	18241278	2.1069e+07	2.11926e+07	7.123	0.000268136	0.00352159	Up
S2535	SRRM2_MOUSE	75956	Srrm2	2.2607e+08	8.02193e+07	5.16306e+07	833951806	7.40379e+08	6.33076e+08	6.9376	0.00125826	0.00787078	Up
S1996	SRRM2_MOUSE	75956	Srrm2	2.00233e+07	9.80795e+06	1.26191e+06	6.71676e+07	6.25487e+07	5.82789e+07	6.80242	0.0006764	0.00548778	Up
S1998	SRRM2_MOUSE	75956	Srrm2	2.00233e+07	9.80795e+06	1.26191e+06	6.71676e+07	6.25487e+07	5.82789e+07	6.80242	0.0006764	0.00548778	Up
S209	SWAP1_MOUSE	66962	Swsap1	8.94747e+06	8.87678e+06	1.00012e+07	54056632	5.52229e+07	5.62532e+07	6.73119	1.19712e-07	0.000195815	Up
S626	SAFB1_MOUSE	224903	Safb	5.55228e+07	2.18737e+07	1.20856e+07	177796004	1.72797e+08	1.58422e+08	6.39912	0.00044028	0.00441374	Up
T110	D3Z3E0_MOUSE	107823	Nsd2	8.62686e+06	7.99908e+06	9.05969e+06	45416932	4.86364e+07	4.94282e+07	6.31788	3.33837e-06	0.000467167	Up
S683	R12BA_MOUSE	72397	Rbm12b1	1.66145e+07	5.11303e+06	5.19272e+06	5.41915e+07	4.82188e+07	4.75595e+07	6.26572	0.000536704	0.00490029	Up
S430	VIME_MOUSE	22352	Vim	5.75026e+06	4.67887e+06	5.31865e+06	2.86757e+07	2.87689e+07	2.89813e+07	6.20415	1.73966e-07	0.000195815	Up
S232	ODPA_MOUSE	18597	Pdha1	4.34365e+06	1.74882e+06	1.32422e+06	16490106	1.2613e+07	1.15668e+07	6.17599	0.00302574	0.013215	Up
S62	F8WIP8_MOUSE	20750	Spp1	5.46615e+06	6.23697e+06	7.01705e+06	37421832	3.18112e+07	3.20194e+07	6.12675	0.000145311	0.00254833	Up
S63	F8WIP8_MOUSE	20750	Spp1	5.46615e+06	6.23697e+06	7.01705e+06	37421832	3.18112e+07	3.20194e+07	6.12675	0.000145311	0.00254833	Up
S161	MDM2_MOUSE	17246	Mdm2	2.92297e+06	3.30401e+06	5.40364e+06	20247554	2.14625e+07	2.10481e+07	6.1118	1.81346e-05	0.0010538	Up
S17	PML_MOUSE	18854	Pml	3.61936e+07	1.33e+07	6.30374e+06	103947024	9.71816e+07	9.58843e+07	5.9847	0.000671549	0.00548007	Up
S1308	A2A468_MOUSE	17979	Ncoa3	3.82676e+06	1.87408e+06	494043	11853939	1.05067e+07	1.03318e+07	5.94007	0.000869095	0.00635329	Up
S165	HDGF_MOUSE	15191	Hdgf	9.59252e+07	1.0578e+08	3.51732e+07	5.36602e+08	3.78654e+08	3.26533e+08	5.93438	0.00703119	0.0232351	Up
S100	HMGA2_MOUSE	15364	Hmga2	5.08071e+06	5.68043e+07	7.17286e+07	256921406	2.11196e+08	223843570	5.89807	0.00110979	0.00732873	Up
S133	A0A0J9YTU3_MOUSE	432572	Specc1	1.49671e+07	6.84976e+06	3.29372e+06	4.6726e+07	4.45394e+07	3.92722e+07	5.85231	0.000757681	0.00585729	Up
S857	E9PZM7_MOUSE	72193	Scaf11	2.37332e+07	1.41461e+07	1.05627e+07	85046831	8.20764e+07	8.3669e+07	5.83926	5.12815e-05	0.00174397	Up
S128	Q91VK2_MOUSE	66656	Eef1d	1.93141e+08	8.46587e+07	3.87786e+07	6.57779e+08	5.27242e+08	455660807	5.83531	0.00356745	0.0146217	Up
S71	J3QNW0_MOUSE	13433	Dnmt1	2.05893e+06	1.11682e+07	1.48277e+07	51996959	4.19608e+07	4.88171e+07	5.7905	0.000969427	0.00680385	Up
S166	Q9DBE5_MOUSE	22695	Zfp36	6.01944e+06	5.99231e+06	6.43386e+06	31724948	3.07078e+07	3.09081e+07	5.72626	5.1335e-07	0.000234669	Up
S232	F8WIP8_MOUSE	20750	Spp1	3.989e+06	4.975e+06	4.46449e+06	2.06403e+07	2.26808e+07	2.41345e+07	5.68714	4.3687e-05	0.00159782	Up
S235	F8WIP8_MOUSE	20750	Spp1	3.989e+06	4.975e+06	4.46449e+06	2.06403e+07	2.26808e+07	2.41345e+07	5.68714	4.3687e-05	0.00159782	Up
S434	Q3UWE6_MOUSE	69641	Wdr20	7.81843e+06	3.66686e+06	1.77162e+06	22549338	2.28555e+07	2.09895e+07	5.63783	0.00045809	0.0045089	Up
S500	LIPB1_MOUSE	67533	Ppfibp1	7.83926e+07	4.02607e+07	2.85116e+07	244152277	2.41224e+08	2.46582e+08	5.60432	0.00013112	0.00244319	Up
S367	SQSTM_MOUSE	18412	Sqstm1	7.1713e+06	7.0348e+06	7.90617e+06	3.70521e+07	3.70512e+07	3.53221e+07	5.59978	1.76609e-06	0.000352965	Up
S208	SRSF2_MOUSE	20382	Srsf2	5.19838e+06	4.84587e+06	5.21725e+06	2.5758e+07	2.58076e+07	2.36652e+07	5.5766	1.15245e-05	0.000850742	Up
S712	RGS3_MOUSE	50780	Rgs3	2.21908e+06	854075	686298	7.57314e+06	5.34123e+06	5.23826e+06	5.43811	0.00537857	0.0193558	Up
S363	RHG25_MOUSE	232201	Arhgap25	6.91062e+06	3.26821e+06	2.50558e+06	2.12552e+07	1.8436e+07	2.02466e+07	5.32379	0.000433046	0.00436864	Up
S73	Q9DBE5_MOUSE	22695	Zfp36	714800	1.09502e+06	940995	4.15258e+06	4.38739e+06	4.17826e+06	5.24028	7.23223e-06	0.000688769	Up
S5393	E9Q616_MOUSE	66395	Ahnak	5.06575e+06	5.12425e+06	5.865e+06	2.61559e+07	2.30007e+07	2.5082e+07	5.23403	3.92452e-05	0.00151997	Up
S1692	MRCKB_MOUSE	217866	Cdc42bpb	5.30775e+06	4.06034e+07	3.70858e+07	119965184	1.28444e+08	1.32519e+08	5.22368	0.00057736	0.00512513	Up
S486	A0A0R4IZZ6_MOUSE	55935	Fnbp4	2.8116e+06	2.1166e+06	2.40017e+06	12690436	1.18102e+07	8.81522e+06	5.14009	0.00182189	0.00980424	Up
S186	TOM34_MOUSE	67145	Tomm34	9.44534e+06	3.093e+06	2.33021e+06	22624862	2.28959e+07	2.1538e+07	5.07026	0.00100887	0.00691091	Up
S670	Q3UKR0_MOUSE	13163	Daxx	3.30387e+06	3.14655e+06	3.13444e+06	2.07761e+06	1.98663e+06	3.90309e+07	5.06867	0.402354	0.494168	not significant
S37	A0A498WGL8_MOUSE	245857	Ssh3	1.67397e+06	1.31354e+06	624088	4990855	6.06519e+06	5.1561e+06	5.06637	0.000524906	0.00483774	Up
S142	F6WIU1_MOUSE	215194	Kri1	8.79356e+06	9.25805e+06	7.71796e+06	4.18847e+07	4.04982e+07	3.25071e+07	5.04632	0.000539004	0.00490179	Up
S72	RAB7A_MOUSE	19349	Rab7a	2.19726e+06	2.78444e+06	2.44607e+06	10400314	1.07192e+07	1.13101e+07	4.944	5.92e-06	0.000621385	Up
S295	E9PUK3_MOUSE	214459	Fnbp1l	5.06013e+07	2.60668e+07	1.73911e+07	141342032	1.39695e+08	1.30601e+08	4.93143	0.00036077	0.00395175	Up
S902	GAPD1_MOUSE	66691	Gapvd1	1.22252e+07	5.23557e+06	3.19212e+06	33576744	3.07066e+07	26096126	4.92696	0.00202529	0.0103252	Up
S13	FGR_MOUSE	14191	Fgr	2.89534e+06	2.08547e+06	1.8648e+06	1.05646e+07	9.84128e+06	9.39945e+06	4.91816	7.61419e-05	0.00198696	Up
T272	SQSTM_MOUSE	18412	Sqstm1	71288876	6.08427e+07	4.95779e+07	264478260	2.57464e+08	2.58963e+08	4.85738	6.22299e-06	0.000627515	Up
S563	NCBP3_MOUSE	66874	Ncbp3	2.84263e+06	3.74865e+06	5.2252e+06	1.63953e+07	1.48973e+07	1.78093e+07	4.70912	0.00023466	0.00332452	Up
S349	A0A2I3BRL8_MOUSE	652988	Gm7324	1.5583e+07	7.8039e+06	4.76284e+06	31434384	5.71603e+07	2.86278e+07	4.68763	0.0315671	0.0689348	Up
S724	ADDA_MOUSE	11518	Add1	2.74063e+06	913252	643756	6.55072e+06	5.98626e+06	5.24119e+06	4.65203	0.00289476	0.0128725	Up
S299	F6WBP9_MOUSE	116873	Stim2	1.17716e+06	1.20177e+06	829061	4.31759e+06	4.16896e+06	4.55772e+06	4.59886	2.52718e-05	0.00125074	Up
S58	RANB3_MOUSE	71810	Ranbp3	739624	6.66471e+06	858436	7.70551e+06	1.38687e+07	1.17579e+07	4.595	0.0243389	0.0565543	Up
S15	TLS1_MOUSE	227707	BC005624	1.81093e+07	2.22632e+07	18898998	8.29055e+07	7.3357e+07	8.20255e+07	4.55303	5.07651e-05	0.00174397	Up
T246	LATS1_MOUSE	16798	Lats1	3.93387e+06	1.89188e+06	989479	8798803	8.77085e+06	9.93203e+06	4.54258	0.00118938	0.00760073	Up
S358	SPHK2_MOUSE	56632	Sphk2	522309	1.01587e+06	630794	3.67976e+06	2.57549e+06	2.33719e+06	4.49876	0.00737542	0.0239343	Up
S62	A0A286YDN0_MOUSE	20411	Sorbs1	1.53506e+06	824988	790303	4.99889e+06	3.81637e+06	3.73507e+06	4.49547	0.00246403	0.0117007	Up
S445	E9PWB1_MOUSE	102693	Phldb1	2.24428e+06	773133	386219	4.18999e+06	4.94723e+06	4.48058e+06	4.49503	0.00307209	0.0133409	Up
S217	G3UYA7_MOUSE	329727	Dennd2c	4.69885e+06	2.53095e+06	777561	10504496	1.05746e+07	1.08093e+07	4.48386	0.00128534	0.00795451	Up
S217	FNIP2_MOUSE	329679	Fnip2	1.63115e+06	2.24535e+06	2.27832e+06	7.15033e+06	8.59313e+06	8.58833e+06	4.47767	0.000203317	0.00310085	Up
S338	E9Q166_MOUSE	320817	Atad2b	3.93755e+06	3.90043e+06	4.28714e+06	18113164	1.59634e+07	1.35845e+07	4.45009	0.000832851	0.00619084	Up
S339	E9Q166_MOUSE	320817	Atad2b	3.93755e+06	3.90043e+06	4.28714e+06	18113164	1.59634e+07	1.35845e+07	4.45009	0.000832851	0.00619084	Up
S504	D3Z390_MOUSE	76895	Bicd2	2.56916e+07	1.22483e+07	6.3287e+06	62520678	5.93575e+07	5.20145e+07	4.42364	0.00185506	0.00988354	Up
S17	TLS1_MOUSE	227707	BC005624	1.81093e+07	2.16223e+07	1.80773e+07	7.76914e+07	6.961e+07	7.74613e+07	4.40246	3.95366e-05	0.00151997	Up
T524	Q3UKR0_MOUSE	13163	Daxx	7.47444e+06	3.89554e+06	2.4258e+06	19655149	1.76789e+07	1.64816e+07	4.39651	0.00118322	0.00760073	Up
S568	KIF15_MOUSE	209737	Kif15	4.40175e+06	1.70541e+06	963824	9306045	8.43613e+06	9.83535e+06	4.38639	0.0023235	0.0112994	Up
S1027	TICRR_MOUSE	77011	Ticrr	3.13362e+06	3.55555e+06	3.10164e+06	13144916	1.1813e+07	1.29625e+07	4.38468	2.87828e-05	0.00131576	Up
S553	CALX_MOUSE	12330	Canx	1.5012e+08	1.48827e+08	1.48141e+08	669206857	5.34038e+08	527358700	4.38191	0.000778488	0.00597102	Up
T87	HNRPD_MOUSE	11991	Hnrnpd	1.12205e+07	1.30032e+07	1.13153e+07	47700482	4.68898e+07	4.13439e+07	4.33094	8.50551e-05	0.00203214	Up
S23	EI2BE_MOUSE	224045	Eif2b5	1.66201e+06	1.5716e+06	1.12146e+06	5.95108e+06	4.69714e+06	5.87048e+06	4.28959	0.000670003	0.00547581	Up
S67	H3BLJ7_MOUSE	13047	Cux1	1.02465e+06	1.31071e+06	1.53915e+06	821677	1.1926e+06	1.25313e+07	4.23934	0.389344	0.480427	not significant
S177	BCLF1_MOUSE	72567	Bclaf1	9.0795e+06	7.94577e+06	2.09019e+06	25362508	2.44857e+07	21598742	4.22117	0.00132977	0.0081051	Up
S569	PEAK1_MOUSE	244895	Peak1	5.56942e+07	2.92439e+07	1.88372e+07	133123890	1.24525e+08	1.30676e+08	4.21674	0.00068134	0.00550686	Up
S125	SPT6H_MOUSE	20926	Supt6h	9.62015e+06	5.11048e+07	3.11104e+07	1.25028e+08	1.1433e+08	9.93828e+07	4.19934	0.00270316	0.012259	Up
S176	G3UX19_MOUSE	12915	Atf6b	1.54479e+06	793102	881600	10148993	881519	865130	4.19	0.386316	0.477353	not significant
S754	ADAM8_MOUSE	11501	Adam8	1.27307e+06	730688	1.12957e+06	3.67314e+06	3.82246e+06	4.12888e+06	4.1882	0.000108512	0.00223456	Up
S308	SQSTM_MOUSE	18412	Sqstm1	9.21796e+06	8.76812e+06	8.20853e+06	3.18236e+07	3.23016e+07	3.227e+07	4.1621	1.45295e-07	0.000195815	Up
S748	PTN12_MOUSE	19248	Ptpn12	3.09202e+06	1.92266e+06	2.88138e+06	9.35204e+06	9.54557e+06	1.01813e+07	4.15913	5.20952e-05	0.00175106	Up
S833	RASA3_MOUSE	19414	Rasa3	1.06209e+07	4.69817e+06	2.75138e+06	23852976	2.04385e+07	2.22521e+07	4.14579	0.00213459	0.0107073	Up
S859	E9PZM7_MOUSE	72193	Scaf11	3.33932e+07	2.52148e+07	1.98689e+07	9.93421e+07	9.42166e+07	9.42381e+07	4.14236	6.38313e-05	0.00189677	Up
S104	HMGA2_MOUSE	15364	Hmga2	1.02358e+07	1.01745e+08	129768753	3.21895e+08	2.65867e+08	2.89873e+08	4.13388	0.00353008	0.0145224	Up
S97	A2A842_MOUSE	269587	Epb41	1.77829e+07	8.93873e+06	5.47295e+06	3.81884e+07	3.8702e+07	3.87483e+07	4.04576	0.000950082	0.00671723	Up
S314	DFFA_MOUSE	13347	Dffa	4.47892e+07	1.60124e+07	1.34809e+07	89056088	8.79979e+07	8.94633e+07	4.03595	0.00184447	0.0098348	Up
S54	LPXN_MOUSE	107321	Lpxn	3.79143e+06	4.4105e+06	4.29628e+06	16366488	1.45113e+07	1.36453e+07	4.03489	0.000210653	0.00312041	Up
S134	A0A0R4J195_MOUSE	70470	Rprd1b	1.10971e+07	6.36337e+06	3.3827e+06	2.58137e+07	2.41386e+07	2.45663e+07	4.02994	0.000914643	0.00655351	Up
S588	FNIP2_MOUSE	329679	Fnip2	1.42418e+06	3.02729e+06	2.473e+06	9026718	8.52035e+06	6.7854e+06	3.98989	0.00165951	0.0092816	Up
S279	BRD7_MOUSE	26992	Brd7	1.47365e+06	1.7513e+06	1.49109e+06	5656283	5.57326e+06	5.20314e+06	3.94546	1.7376e-05	0.00103606	Up
S2656	SRRM2_MOUSE	75956	Srrm2	354056	8.62224e+06	1.55128e+06	1.12597e+07	1.20267e+07	1.28863e+07	3.92153	0.0173222	0.0440573	Up
S2045	E9PV45_MOUSE	329908	Usp24	6.25405e+07	2.88701e+07	1.65822e+07	129445480	1.17611e+08	127735749	3.90747	0.00205663	0.0104307	Up
S309	SMRC1_MOUSE	20588	Smarcc1	743948	3.83073e+06	548924	5056189	6.45083e+06	6.0783e+06	3.90617	0.0124133	0.0344381	Up
S968	FLNA_MOUSE	192176	Flna	7.35021e+06	6.32923e+06	7.13389e+06	23948922	2.274e+07	2.43475e+07	3.85955	7.98768e-06	0.000721813	Up
S42	KAT8_MOUSE	67773	Kat8	1.99268e+06	847174	512729	4037295	3.59812e+06	3.78412e+06	3.83391	0.00279613	0.0125396	Up
S23	UIF_MOUSE	69823	Fyttd1	709388	1.72521e+06	1.01006e+06	3.45271e+06	3.92933e+06	4.22977e+06	3.82597	0.00104581	0.00703053	Up
S642	BCAP_MOUSE	83490	Pik3ap1	5.27995e+06	5.74235e+06	6.50302e+06	2.03032e+07	2.05518e+07	1.82082e+07	3.81575	6.27699e-05	0.00188778	Up
S238	F8VQC9_MOUSE	218756	Slc4a7	6.56083e+06	6.67032e+06	5.96608e+06	19948692	2.35331e+07	2.09648e+07	3.79718	0.000107228	0.00222135	Up
T433	A0A1B0GRZ5_MOUSE	54006	Deaf1	1.32679e+06	1.43872e+06	1.7835e+06	4.32664e+06	5.56431e+06	5.34861e+06	3.79093	0.000620846	0.00527526	Up
S275	BCLF1_MOUSE	72567	Bclaf1	3.6708e+06	2.59658e+06	2.33574e+06	2.60376e+06	2.71006e+06	23638095	3.78921	0.367066	0.459672	not significant
S657	MTMR1_MOUSE	53332	Mtmr1	3.26391e+07	1.15322e+07	9.24779e+06	5.82529e+07	6.09927e+07	6.05267e+07	3.78463	0.0028761	0.0128144	Up
S751	S26A6_MOUSE	171429	Slc26a6	544754	760407	729851	2.69014e+06	1.97768e+06	2.04977e+06	3.74318	0.0024489	0.0116612	Up
S375	ABRX2_MOUSE	109359	Abraxas2	2.32874e+06	883356	706835	4.85252e+06	4.41563e+06	3.72704e+06	3.73262	0.0053393	0.0192389	Up
S163	TAGL2_MOUSE	21346	Tagln2	1.08256e+07	5.26202e+06	2.76985e+06	20202356	2.05449e+07	2.16636e+07	3.72607	0.00225466	0.011094	Up
S838	A0A0J9YTU3_MOUSE	432572	Specc1	2.53935e+07	2.68173e+07	2.68317e+07	8.40344e+07	8.79196e+07	8.48905e+07	3.67729	4.74661e-07	0.000232482	Up
S32	DAB2_MOUSE	13132	Dab2	1.75486e+06	1.13679e+06	1.06988e+06	3.99109e+06	4.60207e+06	4.27395e+06	3.66539	0.000281049	0.0035871	Up
S116	E41L2_MOUSE	13822	Epb41l2	1.84423e+06	3.35641e+06	2.16628e+06	1.03362e+07	6.11633e+06	7.24538e+06	3.65228	0.0131305	0.0359281	Up
S1514	DIDO1_MOUSE	23856	Dido1	2.211e+06	1.11418e+06	938626	4.60921e+06	4.73152e+06	4.37455e+06	3.62529	0.000951208	0.00671723	Up
S655	RBM15_MOUSE	229700	Rbm15	759081	8.22041e+06	2.39144e+06	1.34752e+07	1.10673e+07	1.15486e+07	3.62031	0.0148204	0.0392087	Up
S1032	Z4YJT3_MOUSE	73158	Larp1	5.32591e+06	4.82069e+06	5.37575e+06	3.59404e+06	3.48703e+06	4.22186e+07	3.58118	0.409679	0.501369	not significant
S1113	MYO9B_MOUSE	17925	Myo9b	8.33145e+06	3.1791e+06	2.88122e+06	1.60801e+07	1.57025e+07	1.39662e+07	3.57824	0.00326704	0.0138723	Up
S6	ROA1_MOUSE	15382	Hnrnpa1	2.26489e+07	2.5632e+07	5.18561e+06	6.95382e+07	5.0941e+07	4.8071e+07	3.56739	0.0106357	0.0308628	Up
S572	E9QM61_MOUSE	22592	Ercc5	1.04333e+06	708025	1.15141e+06	3.04446e+06	3.04618e+06	3.03859e+06	3.5545	5.55374e-05	0.00177625	Up
S401	E9PUK6_MOUSE	51796	Srrm1	291057	1.09672e+07	1.98722e+06	1.33176e+07	1.56345e+07	1.1964e+07	3.52728	0.0338721	0.0726043	Up
T404	E9PUK6_MOUSE	51796	Srrm1	291057	1.09672e+07	1.98722e+06	1.33176e+07	1.56345e+07	1.1964e+07	3.52728	0.0338721	0.0726043	Up
S1468	RRP5_MOUSE	18572	Pdcd11	3.23018e+07	1.36666e+07	9.63652e+06	5.99797e+07	5.71564e+07	5.67391e+07	3.52005	0.00299984	0.0131521	Up
S697	ASPP2_MOUSE	209456	Tp53bp2	1.90384e+07	7.07402e+06	5.25254e+06	32923672	3.33409e+07	3.18198e+07	3.51778	0.00405925	0.0158561	Up
S460	H7BX02_MOUSE	381305	Rc3h1	2.78663e+06	2.69133e+06	2.36952e+06	1.03712e+07	7.28216e+06	6.68966e+06	3.51207	0.00791993	0.0251654	Up
S390	SYCC_MOUSE	27267	Cars1	2.8536e+06	2.75641e+06	3.21157e+06	8.44433e+06	9.74253e+06	9.15456e+06	3.50601	6.05101e-05	0.00184408	Up
S235	WIPF2_MOUSE	68524	Wipf2	3.09436e+06	3.1098e+06	3.62295e+06	9854772	1.00784e+07	1.0346e+07	3.48667	2.65553e-06	0.000433547	Up
S1189	E9Q9C3_MOUSE	17356	Afdn	1.17727e+08	6.64552e+07	4.10213e+07	232348686	2.37588e+08	2.24181e+08	3.47418	0.00140172	0.00840912	Up
S205	Q8BH40_MOUSE	53331	Stx7	472015	766458	358332	1.56018e+06	1.74874e+06	1.54081e+06	3.44182	0.000738123	0.00579011	Up
S60	F8VQC9_MOUSE	218756	Slc4a7	1.39207e+06	1.23499e+06	1.47976e+06	4.56685e+06	3.88755e+06	4.00943e+06	3.4339	0.00023006	0.00327967	Up
S122	FA53C_MOUSE	66306	Fam53c	569639	724479	788515	2.11526e+06	1.89652e+06	2.29331e+06	3.42956	0.000299486	0.00364361	Up
S422	IF4B_MOUSE	75705	Eif4b	932335	7.68016e+06	4.13017e+06	1.26025e+07	1.34804e+07	1.22355e+07	3.42513	0.00647565	0.0219397	Up
S395	ACBD5_MOUSE	74159	Acbd5	982851	1.4954e+06	1.23208e+06	4.19155e+06	3.64422e+06	3.28272e+06	3.39808	0.000993974	0.00686479	Up
S387	U2AFM_MOUSE	22184	Zrsr2	4.21455e+06	1.59007e+06	1.15174e+06	7.10337e+06	6.82021e+06	7.00711e+06	3.38491	0.00487556	0.0180128	Up
S389	U2AFM_MOUSE	22184	Zrsr2	4.21455e+06	1.59007e+06	1.15174e+06	7.10337e+06	6.82021e+06	7.00711e+06	3.38491	0.00487556	0.0180128	Up
S776	RUSC2_MOUSE	100213	Rusc2	4.31881e+06	4.82823e+06	4.65717e+06	14263904	1.37217e+07	1.3188e+07	3.37688	1.2832e-05	0.00087989	Up
S90	JUND_MOUSE	16478	Jund	1.06068e+06	943234	3.64151e+06	8.80654e+06	3.83098e+06	4.07489e+06	3.36175	0.0971787	0.16327	not significant
S231	HS90A_MOUSE	15519	Hsp90aa1	62356.4	9.64861e+07	2.64005e+07	1.12988e+08	1.05579e+08	140088777	3.33068	0.0370103	0.0774427	Up
S315	PCY1A_MOUSE	13026	Pcyt1a	8.02966e+06	7.03816e+06	6.19787e+06	19531747	1.95544e+07	2.34787e+07	3.32511	0.000437412	0.00439785	Up
S333	A0A1Y7VLJ5_MOUSE	83924	Gpr137b	577877	727000	999075	2.66273e+06	1.83644e+06	2.17914e+06	3.28653	0.00452239	0.0171421	Up
T600	E9PUK6_MOUSE	51796	Srrm1	158385	2.33672e+07	3.62057e+06	2.3421e+07	2.96599e+07	2.45733e+07	3.26725	0.0526191	0.101408	not significant
S602	E9PUK6_MOUSE	51796	Srrm1	158385	2.33672e+07	3.62057e+06	2.3421e+07	2.96599e+07	2.45733e+07	3.26725	0.0526191	0.101408	not significant
S103	SH3L2_MOUSE	212531	Sh3bgrl2	2.41391e+06	2.41457e+06	1.84904e+06	6.16142e+06	7.13458e+06	5.94504e+06	3.25872	0.00036368	0.00397095	Up
S550	A0A5F8MP98_MOUSE	319939	Tns3	881023	678819	617181	3.03512e+06	2.03156e+06	1.17808e+06	3.24621	0.0585199	0.110452	not significant
T269	SQSTM_MOUSE	18412	Sqstm1	1.52847e+08	1.45941e+08	1.4695e+08	432490388	418259455	4.27469e+08	3.24402	1.12048e-06	0.000325799	Up
S117	UIF_MOUSE	69823	Fyttd1	1.24056e+06	1.78785e+06	2.915e+06	5.33162e+06	5.50481e+06	6.02966e+06	3.21691	0.00120076	0.00763836	Up
S129	Q8BH40_MOUSE	53331	Stx7	2.46803e+07	1.26754e+07	8.93914e+06	48282746	4.30153e+07	3.99501e+07	3.19569	0.00395416	0.0156159	Up
S192	EI2BD_MOUSE	13667	Eif2b4	1.08118e+06	1.54931e+06	1.08544e+06	3442471	3.37272e+06	3.65628e+06	3.19254	9.98076e-05	0.00218065	Up
S1049	TRIPC_MOUSE	14897	Trip12	3.63366e+07	2.02983e+07	1.54738e+07	6.71214e+07	6.80064e+07	6.90524e+07	3.19227	0.00126313	0.00787387	Up
S594	A0A3B2W7J8_MOUSE	18810	Plec	1.80444e+07	7.80146e+06	4.37442e+06	30476046	2.88871e+07	2.62505e+07	3.18883	0.00765573	0.0245995	Up
S368	SQSTM_MOUSE	18412	Sqstm1	8.39739e+07	8.22614e+07	8.15984e+07	227299215	2.2663e+08	2.37845e+08	3.15763	1.41688e-06	0.00033502	Up
S237	MS18B_MOUSE	70645	Oip5	7.74999e+06	6.92863e+06	7.58554e+06	20985834	2.07691e+07	2.01661e+07	3.14561	4.01234e-06	0.000502292	Up
S489	DTL_MOUSE	76843	Dtl	956346	1.43436e+06	1.48975e+06	3.13239e+06	3.78571e+06	3.84193e+06	3.14178	0.000698581	0.00555366	Up
S51	GCH1_MOUSE	14528	Gch1	1.15582e+07	5.94513e+06	6.18765e+06	19407730	2.30818e+07	2.34692e+07	3.13791	0.00196679	0.0101898	Up
S175	AFF4_MOUSE	93736	Aff4	5.70733e+07	2.69663e+07	2.26842e+07	1.05924e+08	9.69145e+07	9.37981e+07	3.13213	0.00319048	0.0136561	Up
S240	KPRB_MOUSE	212627	Prpsap2	330397	567841	488987	1.45431e+06	635835	1.7348e+06	3.12809	0.0606398	0.113577	not significant
S862	RBBP6_MOUSE	19647	Rbbp6	7.22894e+06	6.30059e+06	7.80258e+06	19592074	1.96775e+07	1.96771e+07	3.12532	5.12811e-06	0.000574305	Up
S132	ARP8_MOUSE	56249	Actr8	1.25521e+07	4.94001e+06	3.8084e+06	18843592	2.03057e+07	1.96901e+07	3.10799	0.00614261	0.0211339	Up
S994	MYPT1_MOUSE	17931	Ppp1r12a	3.37789e+06	2.87484e+06	3.29654e+06	8.33767e+06	9.9215e+06	7.85946e+06	3.0924	0.000745947	0.00582569	Up
S214	VAPA_MOUSE	30960	Vapa	38688483	4.10923e+07	4.09524e+07	103737440	113511576	112635922	3.09175	1.15376e-05	0.000850742	Up
S5	PKHO2_MOUSE	102595	Plekho2	4.34609e+06	4.21876e+06	3.97807e+06	1.21256e+07	1.11686e+07	1.0875e+07	3.08226	5.96843e-05	0.00182703	Up
S231	TBCD1_MOUSE	57915	Tbc1d1	8.87052e+06	4.06679e+06	3.05743e+06	14486313	1.37738e+07	1.55174e+07	3.08222	0.00443933	0.0168926	Up
S5	SRSF3_MOUSE	20383	Srsf3	1.76472e+07	6.66349e+06	3.86027e+06	2.55833e+07	2.59394e+07	2.56591e+07	3.08092	0.0102798	0.0300334	Up
S18	IEX1_MOUSE	15937	Ier3	7.02581e+06	7.02416e+06	7.1262e+06	18141898	1.98157e+07	1.96509e+07	3.07746	1.01895e-05	0.000812444	Up
S424	E9Q9C3_MOUSE	17356	Afdn	3.97217e+06	3.21172e+06	2.91806e+06	9236549	9.04342e+06	9.22081e+06	3.07645	3.7602e-05	0.00150782	Up
S24	SQSTM_MOUSE	18412	Sqstm1	2.52662e+06	2.90834e+06	2.6012e+06	7.54985e+06	7.11594e+06	6.85925e+06	3.03282	3.86728e-05	0.00151997	Up
S693	Q9JHF5_MOUSE	27060	Tcirg1	6.20917e+07	6.41679e+07	7.12628e+07	1.73461e+08	1.7789e+08	1.76158e+08	3.0224	1.05548e-06	0.000325799	Up
S84	A0A1W2P7F9_MOUSE	12226	Btg1	2.81433e+06	3.54132e+06	2.75805e+06	8318811	8.38565e+06	7.56123e+06	3.01537	0.000100731	0.00218065	Up
S1565	A0A5H1ZRL7_MOUSE	27223	Trp53bp1	623027	765582	728007	2.32475e+06	1.68266e+06	1.62349e+06	3.01536	0.00586329	0.0204418	Up
S2101	SC16A_MOUSE	227648	Sec16a	2.9317e+06	2.44109e+06	1.93036e+06	6.36349e+06	6.02625e+06	7.02794e+06	3.00423	0.000394601	0.00414078	Up
S466	F6RDI8_MOUSE	69207	Srsf11	263966	2.72838e+07	3.56816e+06	22889818	2.78928e+07	3.0935e+07	2.99894	0.0798223	0.140796	not significant
S402	Q3ZB59_MOUSE	14389	Gab2	6.18751e+06	2.95632e+06	1.95866e+06	9179256	1.01314e+07	1.00456e+07	2.97717	0.00546482	0.0195677	Up
S327	SMRC1_MOUSE	20588	Smarcc1	3.15295e+08	2.26035e+08	1.54302e+08	669813857	5.94747e+08	5.67629e+08	2.97425	0.00165501	0.00927156	Up
S516	Q3UKR0_MOUSE	13163	Daxx	7.47444e+06	3.89554e+06	2.4258e+06	1.27167e+07	1.18673e+07	1.17791e+07	2.97019	0.00459889	0.0173172	Up
S253	ALKB5_MOUSE	268420	Alkbh5	828473	1.29594e+06	1.05253e+06	2.75171e+06	2.75684e+06	2.81208e+06	2.96874	8.54643e-05	0.00203482	Up
S208	TLE4_MOUSE	21888	Tle4	6.88008e+06	2.59603e+06	1.67903e+06	9247775	1.05244e+07	9.60247e+06	2.96114	0.0122469	0.0341233	Up
S286	A0A7N9VR94_MOUSE	100041194	Ahnak2	1.10826e+07	4.93005e+06	2.26216e+06	1.61446e+07	1.51648e+07	1.67065e+07	2.95648	0.0116342	0.0328024	Up
S48	D6RFT9_MOUSE	22682	Zfand5	8.62896e+06	1.07894e+07	1.07764e+07	2.38438e+07	3.00624e+07	2.46926e+07	2.94742	0.000942914	0.0066793	Up
S5362	E9Q616_MOUSE	66395	Ahnak	426081	333031	391640	936695	1.13456e+06	929439	2.94682	0.000731787	0.00575249	Up
S430	MOT4_MOUSE	80879	Slc16a3	5.96102e+07	6.17144e+07	6.13759e+07	1.53869e+08	1.58073e+08	1.63816e+08	2.94645	1.71689e-06	0.000352965	Up
S316	PURB_MOUSE	19291	Purb	4.06436e+06	8.00387e+06	6.04943e+06	1.62371e+07	1.53903e+07	1.53107e+07	2.93981	0.000557785	0.00502592	Up
S634	KDM7A_MOUSE	338523	Kdm7a	1.26242e+07	1.11731e+07	1.07511e+07	3.1295e+07	2.47283e+07	3.35515e+07	2.93195	0.00195165	0.0101503	Up
S21	A0A0G2JGV2_MOUSE	29815	Bcar3	1.16437e+06	4.84989e+06	1.03608e+06	5.81105e+06	6.03018e+06	6.2639e+06	2.92132	0.0221958	0.0529312	Up
S1001	MYO1E_MOUSE	71602	Myo1e	2.42329e+06	1.95534e+06	1.77548e+06	4617276	4.84802e+06	6.41817e+06	2.91514	0.00396478	0.0156325	Up
T370	E9Q3G8_MOUSE	218210	Nup153	964478	929110	916367	2134002	2.76871e+06	2.33745e+06	2.91353	0.000961327	0.0067624	Up
S1821	A0A087WNL7_MOUSE	100043597	Srcap	2.12466e+06	1.76499e+06	1.2468e+06	4792647	3.98733e+06	4.34449e+06	2.88784	0.00109494	0.00726818	Up
S17	SRC_MOUSE	20779	Src	4.55275e+06	6.71816e+06	3.67737e+06	1.11637e+07	1.23929e+07	1.45579e+07	2.88741	0.00252824	0.0118557	Up
S234	CD11B_MOUSE	12537	Cdk11b	1.76773e+07	2.84852e+07	3.36687e+07	6.91265e+07	6.58889e+07	6.73463e+07	2.87476	0.000472088	0.00459777	Up
T14	UIF_MOUSE	69823	Fyttd1	5.40546e+06	6.56561e+06	6.20551e+06	16729402	1.44671e+07	1.493e+07	2.87461	0.000223117	0.00324823	Up
S603	E9Q3G8_MOUSE	218210	Nup153	818475	827939	1.16755e+06	2.01671e+06	2.61362e+06	2.49576e+06	2.86522	0.00154705	0.00892942	Up
S883	K1522_MOUSE	97130	Kiaa1522	2.51882e+06	3.10651e+06	5.70555e+06	9368907	9.68101e+06	9.54667e+06	2.8601	0.00194335	0.0101412	Up
T6	G3UW85_MOUSE	13877	Erh	1.34013e+07	1.52885e+07	1.44586e+07	3.3164e+07	3.82851e+07	3.74914e+07	2.85738	0.000100468	0.00218065	Up
S1281	PHIP_MOUSE	83946	Phip	3.16902e+06	2.45313e+06	2.42079e+06	6443476	7.31751e+06	6.50023e+06	2.84604	0.000256931	0.00343581	Up
S1283	PHIP_MOUSE	83946	Phip	3.16902e+06	2.45313e+06	2.42079e+06	6443476	7.31751e+06	6.50023e+06	2.84604	0.000256931	0.00343581	Up
S841	E9PZM7_MOUSE	72193	Scaf11	1.60359e+06	1.14494e+06	1.47855e+06	2.99995e+06	4.31888e+06	3.33113e+06	2.84547	0.00490258	0.0180931	Up
S843	E9PZM7_MOUSE	72193	Scaf11	1.60359e+06	1.14494e+06	1.47855e+06	2.99995e+06	4.31888e+06	3.33113e+06	2.84547	0.00490258	0.0180931	Up
S11	DCK_MOUSE	13178	Dck	6.18773e+07	3.57556e+07	1.70993e+07	9.48735e+07	9.57517e+07	9.82594e+07	2.83736	0.00611027	0.0210543	Up
S47	CD11B_MOUSE	12537	Cdk11b	9.31973e+06	4.09062e+06	8.44916e+06	1.90009e+07	1.86138e+07	1.71039e+07	2.82495	0.00178092	0.00966886	Up
S343	WASC2_MOUSE	28006	Washc2	795292	1.22533e+06	832018	1.64617e+06	2.45131e+06	3.01403e+06	2.82217	0.0198104	0.0486708	Up
S414	GGA2_MOUSE	74105	Gga2	727187	1.10036e+06	624663	2.04864e+06	1.92933e+06	2.11907e+06	2.81734	0.000649742	0.00540689	Up
S420	VIME_MOUSE	22352	Vim	1.12001e+07	1.07178e+07	8.5033e+06	25568149	2.80395e+07	2.19881e+07	2.81036	0.00108547	0.00722627	Up
S126	Q8BH40_MOUSE	53331	Stx7	1.90557e+07	9.24761e+06	5.45868e+06	28003650	2.73656e+07	2.88646e+07	2.80955	0.00809636	0.0256294	Up
S295	RL4_MOUSE	67891	Rpl4	6.61056e+07	2.60426e+07	1.55714e+07	94795600	8.88568e+07	8.36307e+07	2.79173	0.0163972	0.0421423	Up
T363	A0A2I3BPQ5_MOUSE	67302	Zc3h13	1.97723e+07	8.14215e+06	4.77178e+06	26922872	2.74181e+07	2.65487e+07	2.78429	0.0137638	0.0373184	Up
S38	GPSM3_MOUSE	106512	Gpsm3	2.10408e+07	1.37456e+07	6.60318e+06	38034296	3.25295e+07	3.11779e+07	2.77338	0.00773202	0.0247518	Up
S400	SASH1_MOUSE	70097	Sash1	2.89737e+06	2.84239e+06	2.97538e+06	7.6657e+06	6.57381e+06	7.06277e+06	2.76623	0.000185789	0.00295581	Up
S439	I2BP2_MOUSE	270110	Irf2bp2	6.68142e+06	2.77099e+06	3.05869e+06	10036610	9.98143e+06	1.0685e+07	2.76394	0.00499542	0.0183272	Up
T305	SGTA_MOUSE	52551	Sgta	695161	1.75103e+07	1.08426e+07	2.15119e+07	2.30445e+07	2.56004e+07	2.75276	0.0280561	0.0630963	Up
S541	RUSC2_MOUSE	100213	Rusc2	424153	636369	674020	1.26583e+06	1.468e+06	1.46497e+06	2.7431	0.00059967	0.00522483	Up
S1048	CE170_MOUSE	545389	Cep170	1.32493e+07	7.02075e+06	6.39439e+06	2.45612e+07	2.23048e+07	1.7855e+07	2.73804	0.00865842	0.0267315	Up
S248	JUNB_MOUSE	16477	Junb	1.18638e+07	1.47334e+07	1.52532e+07	3.45256e+07	3.47326e+07	3.17808e+07	2.73479	8.66969e-05	0.00205703	Up
S154	H9KV04_MOUSE	210711	Mcmbp	3.04748e+07	1.61684e+07	8.90036e+06	45475104	4.22838e+07	4.68844e+07	2.73105	0.00856396	0.0266077	Up
S213	MOT1_MOUSE	20501	Slc16a1	3.18713e+07	4.73897e+07	3.26532e+07	83918878	9.56694e+07	8.91561e+07	2.72051	0.000433232	0.00436864	Up
S433	Q0VGT3_MOUSE	229584	Pogz	2.09304e+06	2.06996e+06	755128	3.96603e+06	3.57919e+06	4.25438e+06	2.71151	0.00483422	0.0179247	Up
S1049	G3UX48_MOUSE	53761	Prrc2a	2.04613e+07	1.3424e+07	1.09244e+07	4.13182e+07	3.33797e+07	3.22646e+07	2.69551	0.004874	0.0180128	Up
S886	A0A0R4J0J8_MOUSE	74392	Specc1l	1.90561e+06	1.3412e+06	1.00295e+06	3678232	3.25345e+06	3.18823e+06	2.68906	0.0019525	0.0101503	Up
S667	CBL_MOUSE	12402	Cbl	2.93426e+06	4.03828e+06	3.33597e+06	8.06615e+06	8.42355e+06	7.96859e+06	2.68791	6.53832e-05	0.00192417	Up
S31	IEX1_MOUSE	15937	Ier3	2.05786e+06	1.89682e+06	1.00315e+06	4.32143e+06	3.58407e+06	3.83954e+06	2.67815	0.00278098	0.0124962	Up
S39	FLI1_MOUSE	14247	Fli1	1.69262e+07	8.43943e+06	5.74745e+06	23575684	2.58778e+07	2.43126e+07	2.67051	0.00790541	0.0251624	Up
S63	JUN_MOUSE	16476	Jun	6.32573e+06	6.20864e+06	6.41769e+06	14134577	1.56391e+07	1.48934e+07	2.66603	2.00601e-05	0.00114627	Up
S2426	CENPE_MOUSE	229841	Cenpe	4.84801e+06	5.96622e+06	5.07982e+06	16115653	9.78645e+06	1.13897e+07	2.65961	0.0168657	0.0431039	Up
S1241	M3K4_MOUSE	26407	Map3k4	3.16931e+07	1.41967e+07	1.18488e+07	40474793	4.68716e+07	4.88756e+07	2.65606	0.010151	0.0297851	Up
T19	LMNA_MOUSE	16905	Lmna	2.58306e+06	1.90826e+06	1.42469e+06	5.08736e+06	4.72792e+06	4.08257e+06	2.65363	0.00269981	0.012259	Up
S246	JUN_MOUSE	16476	Jun	3.34174e+06	2.93777e+06	3.27459e+06	8.24123e+06	8.58703e+06	5.55407e+06	2.65046	0.00893052	0.0273744	Up
S83	VIME_MOUSE	22352	Vim	2.47908e+06	4.66872e+06	1.77396e+06	8.03143e+06	3.61874e+06	9.16008e+06	2.64651	0.0802995	0.141437	not significant
T163	A0A2I3BRL8_MOUSE	652988	Gm7324	742862	2.57011e+07	4.70192e+06	19359624	2.61151e+07	2.64019e+07	2.63328	0.105349	0.173815	not significant
S494	BCLF1_MOUSE	72567	Bclaf1	2.32803e+06	1.21493e+07	1.14324e+06	9402731	1.30302e+07	1.36818e+07	2.63081	0.0870158	0.150181	not significant
S683	TAF3_MOUSE	209361	Taf3	942006	907205	576735	1.55495e+06	2.06304e+06	2.02702e+06	2.62917	0.00353054	0.0145224	Up
T426	G5E866_MOUSE	81898	Sf3b1	1.12231e+06	1.52531e+06	1.54219e+06	3604129	2.94821e+06	3.16086e+06	2.62781	0.00101432	0.00692832	Up
S910	LRRK2_MOUSE	66725	Lrrk2	8.80759e+06	6.01812e+06	7.04251e+06	16701819	1.79613e+07	1.5825e+07	2.60775	0.000466193	0.00455368	Up
S14	G3X9Z3_MOUSE	68742	Tmem219	771609	763218	951790	1.84982e+06	2.0842e+06	1.7779e+06	2.59942	0.00037102	0.00400643	Up
S1211	AT2B1_MOUSE	67972	Atp2b1	9.69109e+06	1.25233e+07	9.5928e+06	24844717	2.41909e+07	2.39254e+07	2.59802	6.84526e-05	0.00195421	Up
S693	TAXB1_MOUSE	52440	Tax1bp1	2.27382e+06	2.28642e+06	2.05927e+06	4.76047e+06	5.12951e+06	5.30295e+06	2.596	4.01216e-05	0.00151997	Up
S144	G5E884_MOUSE	18479	Pak1	1.31257e+06	1.01993e+06	462425	1813097	1.89699e+06	2.71287e+06	2.59254	0.0218472	0.0522885	Up
S12	PTSS2_MOUSE	27388	Ptdss2	6.56405e+06	3.7783e+06	2.98957e+06	9.69879e+06	1.03146e+07	1.06247e+07	2.5911	0.00355558	0.0145992	Up
S905	A0A2I3BPN8_MOUSE	241694	Ralgapa2	1.12478e+06	2.10617e+06	1.54778e+06	2.07046e+06	2.42269e+06	6.42529e+06	2.58739	0.188394	0.2734	not significant
S159	ETV3_MOUSE	27049	Etv3	9.30426e+06	1.51144e+07	1.45605e+07	3.08225e+07	3.27446e+07	2.53184e+07	2.58603	0.00269157	0.0122469	Up
S46	Q9CPQ9_MOUSE	353204	Aldoart1	2.36836e+07	1.45312e+07	6.17161e+06	35098624	3.22596e+07	3.42766e+07	2.5813	0.0112273	0.0320106	Up
S314	DOK3_MOUSE	27261	Dok3	4.83692e+06	3.81066e+06	4.72127e+06	11325707	9.71293e+06	9.18761e+06	2.55707	0.00120205	0.00763836	Up
S2595	HUWE1_MOUSE	59026	Huwe1	3.44718e+06	5.0896e+06	4.16429e+06	9.64755e+06	9.31879e+06	9.67528e+06	2.55566	0.000150918	0.0025859	Up
S481	DKC1_MOUSE	245474	Dkc1	41449068	1.80861e+07	7.96901e+06	51610920	4.87933e+07	5.26967e+07	2.5517	0.0264175	0.0601611	Up
S733	E9QP19_MOUSE	94093	Trim33	1.20816e+06	1.00754e+06	808743	2.73138e+06	1.10197e+06	2.98233e+06	2.54818	0.0829488	0.145134	not significant
S16	RGS10_MOUSE	67865	Rgs10	137205	4.17201e+06	4.31492e+06	9.30961e+06	5.08419e+06	4.84564e+06	2.5459	0.109921	0.179502	not significant
S243	TR150_MOUSE	230753	Thrap3	5.30442e+07	4.78095e+07	3.86136e+07	98084128	1.0649e+08	1.08196e+08	2.53476	0.00019447	0.00303064	Up
S218	MP2K3_MOUSE	26397	Map2k3	1.55131e+06	1.54868e+06	2.64707e+06	4.40675e+06	4.20019e+06	4.2447e+06	2.53229	0.00139861	0.00839781	Up
S90	Q8BSN6_MOUSE	53330	Vamp4	1.23672e+06	2.76189e+06	1.99089e+06	5073856	4.65117e+06	3.6058e+06	2.52778	0.0101374	0.0297727	Up
S730	CTDP1_MOUSE	67655	Ctdp1	1.33588e+07	6.61818e+06	8.16084e+06	2.41486e+07	2.03386e+07	18382752	2.52111	0.0080121	0.0254089	Up
S934	ZC3H3_MOUSE	223642	Zc3h3	4.80353e+06	4.7613e+06	6.90268e+06	15175334	1.02076e+07	1.1113e+07	2.51094	0.0123297	0.0342842	Up
S920	CTND1_MOUSE	12388	Ctnnd1	2.12611e+06	2.38339e+06	2.74373e+06	1.27099e+07	1.74596e+06	1.5482e+06	2.5107	0.435163	0.525985	not significant
S15	TRPV2_MOUSE	22368	Trpv2	1.40771e+07	1.01869e+07	7.52305e+06	21878486	2.48291e+07	2.37277e+07	2.50116	0.0018298	0.00981762	Up
S899	A0A0A0MQ79_MOUSE	226562	Prrc2c	4.23169e+06	3.90337e+06	3.09773e+06	7421734	8.47855e+06	8.93617e+06	2.49895	0.000693497	0.00553817	Up
S933	KINH_MOUSE	16573	Kif5b	4.07962e+06	5.31566e+06	1.77347e+06	7.87433e+06	9.00659e+06	7.7387e+06	2.49468	0.00768722	0.024643	Up
S210	MOT1_MOUSE	20501	Slc16a1	2.46512e+07	2.95884e+07	2.36433e+07	56545612	5.84177e+07	5.64212e+07	2.49126	3.03726e-05	0.00137924	Up
S114	G5E8U9_MOUSE	12175	Bnip2	5.96004e+07	4.01988e+07	3.66134e+07	91701304	101799168	1.0706e+08	2.48667	0.00158116	0.00903503	Up
S181	Q3UR91_MOUSE	80913	Pum2	4.69772e+07	3.60687e+07	2.87392e+07	8.46712e+07	8.01679e+07	8.12049e+07	2.48642	0.000696209	0.00555105	Up
S389	TAB3_MOUSE	66724	Tab3	785783	2.19563e+06	2.2428e+06	2.73442e+06	4.16605e+06	4.5292e+06	2.4828	0.0284443	0.0637602	Up
S367	SASH1_MOUSE	70097	Sash1	1.47824e+06	1.32291e+06	1.49125e+06	2.99272e+06	3.54522e+06	2.87228e+06	2.47916	0.000888503	0.00644705	Up
S145	CASC3_MOUSE	192160	Casc3	6.75635e+07	3.30876e+07	2.45081e+07	89673716	9.22334e+07	9.31965e+07	2.47602	0.0103555	0.030216	Up
T135	HIRP3_MOUSE	233876	Hirip3	2.5545e+07	2.5891e+07	2.05807e+07	5.42933e+07	5.35212e+07	4.95063e+07	2.47142	0.000153893	0.00262499	Up
S62	A3KGR9_MOUSE	14950	H13	6.15671e+06	3.55545e+06	2.6819e+06	9251544	9.54722e+06	8.36021e+06	2.47122	0.00619806	0.0212501	Up
S1938	MY18A_MOUSE	360013	Myo18a	4.12471e+06	893069	1.12233e+06	4.29046e+06	4.8692e+06	4.34252e+06	2.46891	0.0488739	0.0959147	Up
S398	RANB9_MOUSE	56705	Ranbp9	4.38414e+06	7.34277e+06	2.68555e+06	1.0161e+07	1.06497e+07	1.05115e+07	2.46297	0.00639067	0.0217471	Up
S323	G3UX48_MOUSE	53761	Prrc2a	1.06902e+07	9.36509e+06	5.21685e+06	20740263	1.67185e+07	1.73749e+07	2.4526	0.0054849	0.0195885	Up
S385	ALKB5_MOUSE	268420	Alkbh5	3.83365e+07	15407301	1.07002e+07	4.31803e+07	5.02899e+07	4.68358e+07	2.44915	0.0255385	0.0586265	Up
S987	E9QN14_MOUSE	259302	Srgap3	639098	2.86834e+06	1.71732e+06	3.53915e+06	1.5744e+06	6.13275e+06	2.44781	0.195413	0.280676	not significant
S327	ERF_MOUSE	13875	Erf	2.63388e+06	2.54341e+06	1.7851e+06	4.92527e+06	4.94459e+06	5.19133e+06	2.44585	0.000313289	0.00373514	Up
S229	BIEA_MOUSE	109778	Blvra	1.46402e+06	1.54358e+06	1.61974e+06	3495280	3.84627e+06	2.63691e+06	2.44118	0.00566524	0.0199622	Up
S957	A0A5F8MP98_MOUSE	319939	Tns3	1.93541e+06	1.76349e+06	1.92503e+06	4.08319e+06	4.02076e+06	4.00845e+06	2.43609	4.46299e-06	0.000527633	Up
S303	SGTA_MOUSE	52551	Sgta	695161	1.23504e+07	1.01487e+07	1.55928e+07	1.64896e+07	1.74891e+07	2.43472	0.0371446	0.0776301	Up
S112	ROA3_MOUSE	229279	Hnrnpa3	1.66155e+07	1.23422e+07	2.24463e+07	38499616	4.01698e+07	3.1928e+07	2.43369	0.0039776	0.0156325	Up
S668	MCM3_MOUSE	17215	Mcm3	1.20574e+08	9.8655e+07	9.89656e+07	2.34095e+08	2.30311e+08	2.20119e+08	2.43182	9.91589e-05	0.00218023	Up
S1082	TASO2_MOUSE	105203	Tasor2	4.80495e+06	5.39004e+06	4.5402e+06	11221327	1.11739e+07	8.96231e+06	2.40933	0.00152365	0.00882402	Up
T99	RGCC_MOUSE	66214	Rgcc	1.09662e+07	1.09518e+07	1.02335e+07	2.28021e+07	2.21744e+07	2.34862e+07	2.40901	7.77221e-06	0.00072019	Up
S733	E9PUK6_MOUSE	51796	Srrm1	8.03959e+06	1.0583e+07	1.04749e+07	1.95317e+07	2.0146e+07	2.21925e+07	2.40836	0.000283209	0.00359742	Up
S136	Q3UR91_MOUSE	80913	Pum2	3.87998e+07	1.14947e+07	3.0652e+07	1.67662e+07	7.4151e+07	8.25199e+07	2.40831	0.196635	0.281739	not significant
S474	UBP1_MOUSE	230484	Usp1	4.56721e+06	2.53589e+06	1.78369e+06	6575918	6.21274e+06	6.17028e+06	2.40525	0.00877665	0.0269993	Up
S14	PSD11_MOUSE	69077	Psmd11	6.5245e+06	5.50902e+06	907419	1.09768e+07	9.20875e+06	7.36509e+06	2.40436	0.0460214	0.0914325	Up
S4890	E9Q616_MOUSE	66395	Ahnak	1.59106e+08	1.4327e+08	1.26441e+08	3.20906e+08	3.01518e+08	2.89043e+08	2.40374	0.000207914	0.00311552	Up
S324	GP183_MOUSE	321019	Gpr183	8.34919e+06	9.27757e+06	7.87981e+06	2.02563e+07	1.66248e+07	1.72006e+07	2.40081	0.00106231	0.00710657	Up
S189	MK06_MOUSE	50772	Mapk6	2.78132e+07	1.54336e+07	1.31336e+07	40978668	4.08806e+07	3.81229e+07	2.39988	0.00559414	0.0198033	Up
S170	TPD52_MOUSE	21985	Tpd52	9.38038e+07	4.2327e+07	4.2907e+07	117725720	1.34212e+08	1.29445e+08	2.39941	0.0102459	0.0299543	Up
S1621	MYCB2_MOUSE	105689	Mycbp2	4.20561e+06	3.13602e+06	3.61866e+06	8.20033e+06	7.43452e+06	7.54482e+06	2.39036	0.000358606	0.00393618	Up
S418	PHF20_MOUSE	228829	Phf20	4.35268e+06	3.08243e+06	728946	5.50275e+06	5.66904e+06	6.13155e+06	2.38941	0.0256965	0.0589103	Up
S501	TIF1B_MOUSE	21849	Trim28	1.09749e+06	1.15233e+06	1.47493e+06	2.3438e+06	2.91423e+06	2.60558e+06	2.38912	0.00124054	0.0077969	Up
S237	TALDO_MOUSE	21351	Taldo1	626071	754075	772523	1.72973e+06	1.37663e+06	1.42986e+06	2.38762	0.00192156	0.0100735	Up
S1486	THOC2_MOUSE	331401	Thoc2	1.67134e+06	1.28059e+06	1.18866e+06	2.82994e+06	2.7781e+06	3.13538e+06	2.38537	0.000659634	0.0054169	Up
S1003	RGPA1_MOUSE	56784	Ralgapa1	2.47906e+06	1.0911e+06	1.01846e+06	3.46428e+06	3.58188e+06	2.64959e+06	2.38068	0.0234231	0.055042	Up
S143	TMM9B_MOUSE	56786	Tmem9b	899677	1.29461e+06	2.0321e+06	2906918	3.25013e+06	2.7146e+06	2.37984	0.00639377	0.0217471	Up
S238	TR150_MOUSE	230753	Thrap3	3.91772e+07	2.67438e+07	3.3497e+07	6.75572e+07	7.09107e+07	7.09589e+07	2.37939	0.000321713	0.00374976	Up
S307	SGTA_MOUSE	52551	Sgta	695161	1.34195e+07	1.01487e+07	1.55928e+07	1.64896e+07	1.85254e+07	2.37632	0.0467266	0.0926559	Up
S1677	ICE1_MOUSE	218333	Ice1	3.37887e+06	4.04403e+06	4.39332e+06	8781015	7.91292e+06	8.07311e+06	2.3743	0.000238862	0.00334944	Up
S329	E9PYD3_MOUSE	68299	Vps53	4.01042e+06	3.78788e+06	3.69036e+06	7999817	8.24111e+06	7.85443e+06	2.37221	7.58891e-06	0.000712838	Up
S1054	ZFR_MOUSE	22763	Zfr	8.69635e+07	4.5245e+07	4.44647e+07	1.39065e+08	1.1557e+08	1.16827e+08	2.37166	0.00925171	0.027996	Up
S141	PAK2_MOUSE	224105	Pak2	3.60273e+07	4.0072e+07	3.90427e+07	79932216	7.85921e+07	8.26771e+07	2.37123	5.19278e-06	0.000574305	Up
S224	ARHG6_MOUSE	73341	Arhgef6	3.7742e+08	1.56964e+08	1.24724e+08	446997440	4.86166e+08	4.5526e+08	2.37099	0.0214006	0.051471	Up
S1371	MYO9B_MOUSE	17925	Myo9b	1.6153e+06	6.01489e+06	3.26297e+06	7.83907e+06	7.4597e+06	7.4055e+06	2.37024	0.0176268	0.0446828	Up
T1237	SBNO2_MOUSE	216161	Sbno2	5.88626e+06	3.92315e+06	4.09616e+06	9.91407e+06	9.59802e+06	9.63133e+06	2.36665	0.00074983	0.00583608	Up
S265	ETV6_MOUSE	14011	Etv6	450174	402768	374557	642329	1.352e+06	572252	2.36231	0.118128	0.189906	not significant
S512	G3X9Z4_MOUSE	74737	Pcf11	1.11199e+07	9.01966e+06	7.53958e+06	2.11157e+07	1.90309e+07	1.76907e+07	2.3619	0.00152222	0.00882323	Up
S515	ZC3HE_MOUSE	75553	Zc3h14	1.31066e+08	7.04778e+07	4.43375e+07	1.67857e+08	1.70858e+08	174274720	2.35088	0.0136589	0.0371075	Up
S47	VIME_MOUSE	22352	Vim	2.41325e+07	2.45846e+07	2.47168e+07	4.94146e+07	5.05101e+07	5.19042e+07	2.33933	9.40388e-07	0.000322412	Up
S555	ZEP3_MOUSE	16656	Hivep3	2.51937e+06	1.79448e+06	2.96084e+06	5.01356e+06	4.99762e+06	5.03657e+06	2.33843	0.000715178	0.00564685	Up
S8	A0A0J9YUK0_MOUSE	22215	Ube3a	1.54725e+06	1.03153e+06	825595	2.2677e+06	1.90455e+06	2.88183e+06	2.33822	0.0175184	0.0444574	Up
S565	E9PV80_MOUSE	17978	Ncoa2	1.47331e+06	3.0632e+06	2.20506e+06	2.34728e+06	1.20159e+06	1.03569e+07	2.33604	0.411978	0.503823	not significant
S572	F8WGX5_MOUSE	240283	Dmxl1	6.59977e+06	3.52708e+06	2.47091e+06	8329604	8.5629e+06	9.20218e+06	2.3341	0.012508	0.0345974	Up
S1865	TM131_MOUSE	56030	Tmem131	5.90802e+06	6.38192e+06	7.05968e+06	13463581	1.29473e+07	1.34826e+07	2.33396	2.28473e-05	0.00120511	Up
S1413	G3UWZ0_MOUSE	217578	Baz1a	4.23081e+06	2.64535e+06	1.56567e+06	5.76251e+06	5.41104e+06	6.28249e+06	2.33184	0.0112235	0.0320106	Up
S111	E9Q9Q2_MOUSE	226412	R3hdm1	867382	1.07672e+06	946714	2181513	1.97387e+06	1.79192e+06	2.33065	0.000917682	0.00656842	Up
S257	E9PUD0_MOUSE	53861	Zranb2	742862	1.09229e+07	1.3639e+06	6.82014e+06	1.03419e+07	9.4315e+06	2.32738	0.173533	0.256227	not significant
S229	HMOX1_MOUSE	15368	Hmox1	3.63938e+06	3.57157e+06	3.53345e+06	6806970	7.59946e+06	7.68628e+06	2.32558	8.48672e-05	0.00203214	Up
S639	ARHG6_MOUSE	73341	Arhgef6	3.572e+07	2.04496e+07	1.72396e+07	52938192	4.90408e+07	4.92856e+07	2.3243	0.0060961	0.0210267	Up
S621	PITM1_MOUSE	18739	Pitpnm1	3.572e+07	2.04496e+07	1.72396e+07	52938192	4.90408e+07	4.92856e+07	2.3243	0.0060961	0.0210267	Up
S15	ISCU_MOUSE	66383	Iscu	6.33914e+06	5.76691e+06	6.15339e+06	13118752	1.128e+07	1.30816e+07	2.32195	0.000408515	0.00419968	Up
T1969	BAZ2B_MOUSE	407823	Baz2b	3.12699e+06	3.02407e+06	1.15447e+06	4.74279e+06	5.01684e+06	5.21949e+06	2.31662	0.00829192	0.0260696	Up
S56	F6TLV3_MOUSE	319448	Fndc3a	959987	1.20191e+06	1.38194e+06	2.36753e+06	2.70959e+06	2.17034e+06	2.31658	0.00183711	0.00983079	Up
S312	C2D1A_MOUSE	212139	Cc2d1a	1.62268e+06	1.78232e+06	1.68243e+06	4.08461e+06	3.9021e+06	2.41406e+06	2.3156	0.0214097	0.0514749	Up
S635	E9PUK6_MOUSE	51796	Srrm1	3.01249e+06	1.73205e+07	2.4696e+06	1.53005e+07	1.35958e+07	1.7341e+07	2.30948	0.116288	0.187311	not significant
T890	Q6NZR5_MOUSE	108077	Skiv2l	487573	2.40408e+06	1.73108e+06	2.14523e+06	5.90617e+06	1.32247e+06	2.30486	0.300204	0.39138	not significant
S147	A0A0A6YWN9_MOUSE	71472	Usp19	7.27013e+06	2.88498e+06	6.98621e+06	13473878	8.59639e+06	1.28757e+07	2.30137	0.0306953	0.067396	Up
S635	AAK1_MOUSE	269774	Aak1	1.91491e+07	1.84751e+07	1.98639e+07	39903803	4.04031e+07	3.65194e+07	2.29934	8.22035e-05	0.00201764	Up
S671	PRAG1_MOUSE	244418	Prag1	1.44237e+06	1.83062e+06	2.09364e+06	3422735	4.1057e+06	3.3447e+06	2.29485	0.00200316	0.0102516	Up
S1080	CIC_MOUSE	71722	Cic	2.74664e+07	1.89918e+07	1.1454e+07	40554161	3.87958e+07	38258924	2.29191	0.00673418	0.022547	Up
S437	DSRAD_MOUSE	56417	Adar	2.0735e+06	1.65916e+06	1.60473e+06	3.77189e+06	3.54615e+06	3.49664e+06	2.29021	0.000303398	0.00366268	Up
S184	UB2J1_MOUSE	56228	Ube2j1	2.99909e+06	3.39686e+06	2.97644e+06	7.07472e+06	5.61441e+06	6.25107e+06	2.28845	0.00146379	0.00860086	Up
S239	A0A3B2WBH9_MOUSE	21873	Tjp2	7.30473e+06	1.28025e+07	1.35463e+07	22190982	2.32211e+07	2.2359e+07	2.28403	0.00173878	0.0095101	Up
S532	KANK2_MOUSE	235041	Kank2	777070	3.9103e+06	3.24523e+06	4.56359e+06	6.34454e+06	5.01614e+06	2.28274	0.0383559	0.0793622	Up
S697	G3X9H7_MOUSE	211401	Mtss1	1.03772e+06	1.01603e+06	1.11677e+06	2279256	2.24471e+06	1.85675e+06	2.27773	0.00111805	0.00736632	Up
S619	RGL2_MOUSE	19732	Rgl2	2.91425e+06	1.96332e+06	1.05664e+06	4.3225e+06	3.89047e+06	3.73532e+06	2.27208	0.0129362	0.0354817	Up
S828	PRAG1_MOUSE	244418	Prag1	665084	958689	2.49633e+06	965754	3.91481e+06	3.31342e+06	2.2507	0.212855	0.29964	not significant
T233	PKHO2_MOUSE	102595	Plekho2	7.72278e+07	8.29354e+07	8.46969e+07	1.58974e+08	164516970	1.6326e+08	2.24983	1.21797e-06	0.000325799	Up
T733	A2A7B5_MOUSE	110593	Prdm2	4.167e+06	3.81972e+06	1.11585e+06	5.75547e+06	6.26475e+06	6.09285e+06	2.24715	0.0182551	0.0458181	Up
S1162	A0A5F8MPF3_MOUSE	194401	Mical3	629681	906547	720415	1.58571e+06	1.48529e+06	1.39666e+06	2.24385	0.000784325	0.00598233	Up
S295	A0A1D5RMM7_MOUSE	215114	Hip1	2.03948e+06	1.69063e+06	1.2162e+06	3629346	3.06486e+06	3.12363e+06	2.24346	0.00336941	0.0140964	Up
T252	JUNB_MOUSE	16477	Junb	4.0106e+07	3.43519e+07	3.56669e+07	7.86524e+07	7.20168e+07	6.75746e+07	2.24132	0.000499422	0.00470403	Up
S459	RHG27_MOUSE	544817	Arhgap27	1.95966e+07	2.07873e+07	1.6508e+07	3.83596e+07	3.7712e+07	3.64771e+07	2.23853	9.24796e-05	0.00212235	Up
S1151	F193A_MOUSE	231128	Fam193a	1.28037e+06	1.14898e+06	1.45697e+06	2.12836e+06	2.89517e+06	2.66608e+06	2.23695	0.00373233	0.0151525	Up
S270	SIN3B_MOUSE	20467	Sin3b	1.36966e+06	1.30737e+06	1.07077e+06	2.25467e+06	2.4925e+06	2.6656e+06	2.23604	0.000614417	0.0052529	Up
S1464	BAZ1B_MOUSE	22385	Baz1b	8.10306e+07	7.43539e+07	6.2142e+07	1.42691e+08	1.45411e+08	1.41622e+08	2.23363	0.000119917	0.00234266	Up
S328	Z4YJL0_MOUSE	228536	Bahd1	1.19818e+06	4.69399e+06	3.45225e+06	5.37013e+06	6.52242e+06	6.42403e+06	2.22794	0.0242602	0.0564287	Up
S524	INO1_MOUSE	71780	Isyna1	7.80153e+06	5.96865e+06	1.04736e+07	16875592	1.62118e+07	1.46297e+07	2.2266	0.00297189	0.013063	Up
S175	SENP3_MOUSE	80886	Senp3	1.75601e+06	2.16214e+06	2.87307e+06	4.66251e+06	4.60344e+06	4.05128e+06	2.222	0.00215963	0.0108092	Up
S77	AXIN1_MOUSE	12005	Axin1	1.05176e+06	592954	647179	1.31469e+06	1.61657e+06	1.57717e+06	2.21835	0.00689452	0.0229717	Up
S95	CDK14_MOUSE	18647	Cdk14	1.77343e+07	1.151e+07	1.29565e+07	2.66272e+07	2.5848e+07	3.03739e+07	2.21642	0.00243464	0.01162	Up
S2027	WNK1_MOUSE	232341	Wnk1	101610601	5.28985e+07	3.62829e+07	1.29829e+08	1.20665e+08	1.24168e+08	2.21305	0.0193745	0.0478799	Up
T238	Q9DBE5_MOUSE	22695	Zfp36	1.52353e+06	1.7373e+06	1.25093e+06	2.66711e+06	2.98424e+06	3.17006e+06	2.21203	0.000931058	0.00665028	Up
S2367	WNK1_MOUSE	232341	Wnk1	8.04569e+06	7.93733e+06	6.96599e+06	14867938	1.54339e+07	1.4546e+07	2.21055	3.91406e-05	0.00151997	Up
S772	Q8C605_MOUSE	56421	Pfkp	1.8726e+06	3.77111e+06	1.55629e+06	4.43145e+06	4.50197e+06	5.0505e+06	2.20293	0.0152468	0.039991	Up
T634	SAMH1_MOUSE	56045	Samhd1	4.60765e+06	4.52405e+06	4.67808e+06	8.80458e+06	8.55249e+06	9.52756e+06	2.20239	7.05055e-05	0.00195421	Up
S378	G3X9Q6_MOUSE	207214	Larp4	9.17556e+06	9.81029e+06	1.14911e+07	18572738	2.12961e+07	1.94018e+07	2.20109	0.000350801	0.00389861	Up
S296	CIP4_MOUSE	106628	Trip10	3.52619e+06	6.61345e+06	8.42652e+06	1.16711e+07	1.1939e+07	1.23197e+07	2.19561	0.00642069	0.0218278	Up
S609	PML_MOUSE	18854	Pml	8.9906e+06	9.83851e+06	1.00379e+07	1.89215e+07	1.86944e+07	1.8359e+07	2.19505	5.83753e-06	0.000621385	Up
S221	GPR84_MOUSE	80910	Gpr84	3.97095e+06	3.80389e+06	4.5882e+06	8520451	7.43149e+06	8.02631e+06	2.19505	0.000399612	0.00415803	Up
S972	CO039_MOUSE	74211	1700017B05Rik	4.00007e+06	5.36701e+06	4.27762e+06	9.43508e+06	8.96321e+06	7.9632e+06	2.18907	0.00113329	0.007408	Up
T25	SRSF2_MOUSE	20382	Srsf2	1.01172e+07	9.74772e+06	1.10279e+07	18056526	2.04888e+07	2.11882e+07	2.18695	0.000334899	0.00382734	Up
S147	A0A498WFS2_MOUSE	225896	Ubxn1	1.31157e+07	1.21475e+07	1.38965e+07	2.42552e+07	2.36784e+07	2.77506e+07	2.18598	0.000490882	0.00466202	Up
S71	NU133_MOUSE	234865	Nup133	2.13638e+06	2.51203e+06	2.68086e+06	4785933	5.05238e+06	4.27994e+06	2.18149	0.000646407	0.00539223	Up
S415	SNX17_MOUSE	266781	Snx17	2.9828e+06	2.37221e+06	1.12307e+06	3.6404e+06	4.55187e+06	4.32531e+06	2.1806	0.0155227	0.0405483	Up
S965	TAOK1_MOUSE	216965	Taok1	1.27319e+06	841837	760332	1.7211e+06	1.70979e+06	2.11219e+06	2.17552	0.00699414	0.0231654	Up
S192	DDX21_MOUSE	56200	Ddx21	3.06896e+06	5.83905e+06	2.7262e+06	9.17834e+06	6.18422e+06	6.92716e+06	2.17481	0.0331479	0.0714539	Up
S256	JUNB_MOUSE	16477	Junb	4.97604e+07	4.34475e+07	4.63601e+07	9.44912e+07	8.83056e+07	8.42782e+07	2.16433	0.000228664	0.00326774	Up
S539	E9QAS3_MOUSE	19260	Ptpn22	7.49014e+06	6.7241e+06	6.58459e+06	13008825	1.27733e+07	1.40231e+07	2.16396	0.000109384	0.00224564	Up
S163	SENP3_MOUSE	80886	Senp3	1.77291e+07	1.72068e+07	2.01495e+07	3.39272e+07	3.57034e+07	3.56764e+07	2.16287	3.33946e-05	0.00144381	Up
S322	A0A087WNV1_MOUSE	15463	Agfg1	5.21607e+06	4.27787e+06	4.61239e+06	8.93404e+06	8.8794e+06	9.12302e+06	2.15856	7.0416e-05	0.00195421	Up
S64	LST1_MOUSE	16988	Lst1	7.46811e+06	6.59794e+06	8.93538e+06	16171708	1.50228e+07	1.26038e+07	2.15498	0.00332307	0.0139568	Up
S469	RHG27_MOUSE	544817	Arhgap27	18435648	1.95394e+07	1.71164e+07	3.47034e+07	3.46736e+07	3.50045e+07	2.14396	7.08754e-06	0.000688769	Up
S61	B1AYU7_MOUSE	80744	Cwc22	1.39309e+07	8.14083e+06	4.32981e+06	1.90643e+07	1.53929e+07	1.54551e+07	2.13201	0.0355804	0.0753474	Up
S1003	ACINU_MOUSE	56215	Acin1	1.8996e+08	1.03064e+08	6.16429e+07	227039745	2.21635e+08	2.21879e+08	2.13062	0.0261403	0.0596486	Up
T31	ETV6_MOUSE	14011	Etv6	3.56549e+07	2.92208e+07	2.90094e+07	58741404	6.00389e+07	5.81653e+07	2.13023	0.000145973	0.00255341	Up
S309	YTDC1_MOUSE	231386	Ythdc1	7.38539e+06	8.42552e+06	8.65433e+06	14017468	1.58176e+07	1.61742e+07	2.12853	0.000286377	0.00360304	Up
S207	YBOX1_MOUSE	22608	Ybx1	1.54425e+07	1.68288e+07	1.71507e+07	2.98442e+07	2.99792e+07	3.29818e+07	2.12527	9.1496e-05	0.00211851	Up
S434	CHAP1_MOUSE	101994	Champ1	1.96477e+07	1.48472e+07	1.36029e+07	3.43226e+07	2.92621e+07	2.68259e+07	2.12453	0.00530429	0.0191429	Up
S522	A2A4P3_MOUSE	-	Gm27029	2.22787e+06	1.96786e+06	6.11772e+06	6700046	6.1792e+06	6.45065e+06	2.12347	0.0457401	0.0911115	Up
S925	B1AS67_MOUSE	269608	Plekhg5	7.5711e+06	6.91431e+06	7.12963e+06	13498858	1.31869e+07	1.37555e+07	2.11603	1.39932e-05	0.0009052	Up
S843	Q91UZ1_MOUSE	18798	Plcb4	784519	779281	1.00205e+06	1.48465e+06	1.58299e+06	1.72905e+06	2.11524	0.000783077	0.00598101	Up
S499	XRN2_MOUSE	24128	Xrn2	1.98305e+08	1.56792e+08	1.07867e+08	2.8067e+08	2.88649e+08	294721297	2.10776	0.00329952	0.0139322	Up
S405	ADRM1_MOUSE	56436	Adrm1	5.56943e+06	3.77403e+06	3.26497e+06	7417329	8.04325e+06	8.07589e+06	2.10692	0.00362519	0.0148228	Up
S358	B1AXN9_MOUSE	110651	Rps6ka3	3.11552e+06	1.27579e+06	387486	3.50034e+06	3.05103e+06	2.38684e+06	2.10415	0.121076	0.193434	not significant
S364	SPHK2_MOUSE	56632	Sphk2	1.15288e+07	1.17801e+07	9.97133e+06	20651611	1.99924e+07	2.12537e+07	2.10412	6.8195e-05	0.00195421	Up
T1367	CBPD_MOUSE	12874	Cpd	6.39963e+06	7.40026e+06	7.00053e+06	1.34429e+07	1.28274e+07	1.23735e+07	2.10369	8.12766e-05	0.00201764	Up
S182	Z4YJL0_MOUSE	228536	Bahd1	2.28825e+06	4.44352e+06	2.06588e+06	5.59623e+06	5.51278e+06	5.17515e+06	2.09982	0.0131446	0.0359523	Up
S330	A2A7B5_MOUSE	110593	Prdm2	3.84821e+06	3.71736e+06	3.03189e+06	6929729	6.42626e+06	6.2709e+06	2.095	0.000452324	0.00447559	Up
S563	CALX_MOUSE	12330	Canx	1.56849e+08	1.64017e+08	1.5498e+08	3.47193e+08	2.76992e+08	254486264	2.09097	0.0062863	0.021456	Up
S327	PAIRB_MOUSE	66870	Serbp1	1.24936e+08	1.33831e+08	1.34323e+08	2.48008e+08	2.26876e+08	2.50496e+08	2.08875	9.76974e-05	0.00218023	Up
S501	XRN2_MOUSE	24128	Xrn2	1.98305e+08	1.56792e+08	1.07867e+08	2.77609e+08	2.85925e+08	292280841	2.08769	0.00354313	0.0145568	Up
S534	RUSC2_MOUSE	100213	Rusc2	2.68605e+07	2.605e+07	2.885e+07	48249698	5.02636e+07	5.16744e+07	2.07806	2.07347e-05	0.00115161	Up
S404	TRI25_MOUSE	217069	Trim25	5.21766e+06	9.52384e+06	4.96067e+06	1.47637e+07	1.47331e+07	6.5385e+06	2.07604	0.109253	0.178624	not significant
S37	KPYM_MOUSE	18746	Pkm	619348	617166	539594	1.22119e+06	860028	1.17084e+06	2.07214	0.00885513	0.027192	Up
S1213	WDR33_MOUSE	74320	Wdr33	3.81268e+06	3.35954e+06	3.58812e+06	9.31866e+06	6.99871e+06	3.3651e+06	2.07174	0.125456	0.19881	not significant
T457	DCAF5_MOUSE	320808	Dcaf5	1.71831e+06	1.54429e+06	977352	2.78378e+06	2.08523e+06	2.90152e+06	2.07171	0.0149615	0.0394883	Up
S80	AR6P6_MOUSE	65103	Arl6ip6	2.28679e+07	1.29222e+07	9.75741e+06	28145489	2.63201e+07	2.92025e+07	2.0712	0.0176765	0.0447488	Up
T709	OGA_MOUSE	76055	Oga	622238	657008	976907	1.54412e+06	1.22662e+06	1.35257e+06	2.07032	0.00672345	0.0225331	Up
T931	SET1A_MOUSE	233904	Setd1a	4.95985e+06	9.93884e+07	1.09805e+08	123885936	1.22167e+08	1.43137e+08	2.06966	0.0888575	0.152476	not significant
S428	BCL6_MOUSE	12053	Bcl6	1.70035e+06	1.4141e+06	1.51617e+06	2938201	2.80311e+06	2.73075e+06	2.06865	0.000189042	0.00298677	Up
T34	MCLN1_MOUSE	94178	Mcoln1	5.12753e+06	3.54749e+07	9.25086e+06	4.34996e+07	7.03569e+06	3.98328e+07	2.06815	0.336631	0.42873	not significant
S620	PHAR4_MOUSE	100169	Phactr4	2.72553e+06	2.5258e+06	2.03199e+06	4306311	4.07186e+06	4.85765e+06	2.05453	0.0016091	0.00914894	Up
S546	LMNA_MOUSE	16905	Lmna	1.69175e+07	1.72327e+07	1.81713e+07	33099941	2.99179e+07	3.17944e+07	2.05095	0.000105883	0.00221561	Up
S384	ARI1A_MOUSE	93760	Arid1a	2.93807e+06	2.51215e+06	1.75311e+06	4553187	4.1312e+06	4.38334e+06	2.05024	0.00293497	0.0130041	Up
S734	A0A1D5RM97_MOUSE	546071	Mast3	1.1952e+06	1.06696e+06	1.59933e+06	2.25806e+06	2.17931e+06	2.55446e+06	2.0485	0.00266101	0.0121725	Up
S640	RBL1_MOUSE	19650	Rbl1	6.37613e+06	6.35774e+06	5.16443e+06	1.08336e+07	1.10065e+07	1.05586e+07	2.04755	0.000149478	0.00257932	Up
S2180	FLNA_MOUSE	192176	Flna	1.7741e+06	6.04307e+06	2.85868e+06	6364869	6.22132e+06	6.61268e+06	2.04427	0.0427149	0.0862163	Up
T753	RGPA1_MOUSE	56784	Ralgapa1	5.10778e+06	5.34821e+06	5.4624e+06	6.03775e+06	1.59854e+07	6.74655e+06	2.0429	0.199386	0.28495	not significant
S308	FOSL2_MOUSE	14284	Fosl2	1.08637e+06	1.16298e+06	939456	1.84799e+06	2.00057e+06	1.90682e+06	2.04199	0.000149711	0.00257932	Up
T249	RAI14_MOUSE	75646	Rai14	1.15805e+07	8.31609e+06	3.35478e+06	1.36591e+07	1.31991e+07	1.52115e+07	2.04099	0.0328815	0.070969	Up
S297	ETS2_MOUSE	23872	Ets2	1.65971e+06	1.51425e+06	1.26307e+06	2.63868e+06	2.64642e+06	2.70698e+06	2.03646	0.00025191	0.00342947	Up
T1350	NCOR2_MOUSE	20602	Ncor2	5.05702e+06	4.93129e+06	3.96452e+06	8.25816e+06	8.43278e+06	8.38931e+06	2.03285	0.000183423	0.0029473	Up
S1254	A0A2I3BPP1_MOUSE	22084	Tsc2	4.7153e+06	5.45869e+06	5.77446e+06	9.64943e+06	9.15319e+06	9.76133e+06	2.02806	0.000111694	0.00224641	Up
S2152	FLNA_MOUSE	192176	Flna	5.50799e+07	5.8532e+07	5.74734e+07	1.05689e+08	1.00189e+08	1.00334e+08	2.02588	2.10441e-05	0.00115161	Up
S123	E9PWH3_MOUSE	11787	Apbb2	1.65798e+06	955580	1.28847e+06	2.35973e+06	2.29083e+06	2.33323e+06	2.02045	0.00347868	0.0143686	Up
S511	DTL_MOUSE	76843	Dtl	1.40532e+06	1.05906e+06	1.18578e+06	1929325	2.48826e+06	2.11025e+06	2.0201	0.00419522	0.0162154	Up
S284	A0A571BG95_MOUSE	109934	Abr	4.81601e+06	4.88438e+06	2.29659e+06	5.59337e+06	8.47805e+06	7.32612e+06	2.01493	0.0322763	0.0700804	Up
S927	RPRD2_MOUSE	75137	Rprd2	1.0641e+07	1.12874e+07	9.90785e+06	9278937	3.76412e+07	9.85031e+06	2.01451	0.365096	0.458006	not significant
S115	SFR1_MOUSE	67788	Sfr1	2.75349e+07	2.39667e+07	1.90232e+07	4.13231e+07	4.21475e+07	4.21676e+07	2.01347	0.000785937	0.00598796	Up
S345	GP183_MOUSE	321019	Gpr183	1.50137e+06	1.54376e+06	1.55738e+06	2550223	2.72e+06	2.91935e+06	2.01305	0.000154349	0.00262624	Up
T221	DAB2_MOUSE	13132	Dab2	1.91932e+06	1.761e+06	1.91089e+06	3.36144e+06	3.40602e+06	3.17861e+06	2.01218	5.67302e-05	0.00177625	Up
[truncated: 6,421 more rows]

## Sheet: Table S2
Site	Protein	Gene ID	Gene Symbol	Normalized intensity CTR1	Normalized intensity CTR2	Normalized intensity CTR3	Normalized intensity LNO1	Normalized intensity LNO2	Normalized intensity LNO3	Fold Change (lno_vs_ctr)	pValue (lno_vs_ctr)	FDR (lno_vs_ctr)	Sig (lno_vs_ctr)
S87	Z4YKQ9_MOUSE	237877	Atad5	0.466318	0.37794	0.487175	0.246784	0.245621	0.287948	0.5861	0.00714986	0.023459	Down
S824	Z4YJT3_MOUSE	73158	Larp1	0.909941	1.00204	1.01801	0.61856	0.576392	0.602376	0.613424	0.000459635	0.0045089	Down
S826	Z4YJT3_MOUSE	73158	Larp1	0.909941	1.00204	1.01801	0.61856	0.576392	0.602376	0.613424	0.000459635	0.0045089	Down
S827	Z4YJT3_MOUSE	73158	Larp1	0.909941	1.00204	1.01801	0.61856	0.576392	0.602376	0.613424	0.000459635	0.0045089	Down
T388	Z4YJJ5_MOUSE	74256	Cyld	0.349313	0.292149	0.35076	0.147038	0.244429	0.251805	0.648314	0.0402953	0.0823808	Down
S422	V9GXJ1_MOUSE	-	Gm28036	0.19622	0.162853	0.225294	0.113578	0.0833261	0.112457	0.529396	0.0112071	0.0320106	Down
S989	V9GXD9_MOUSE	217030	Synrg	4.92991	5.36598	5.04183	3.07711	3.52786	3.24463	0.642182	0.000592745	0.00519751	Down
S39	U119A_MOUSE	22248	Unc119	3.77343	4.0545	4.69424	2.71555	2.65186	2.66175	0.641196	0.00538959	0.0193692	Down
S41	U119A_MOUSE	22248	Unc119	1.26012	1.66301	1.87533	0.822055	0.838664	0.764515	0.505419	0.0121457	0.03391	Down
S18	CLIP2_MOUSE	269713	Clip2	0.323699	0.292104	0.357853	0.227239	0.148257	0.154215	0.544042	0.00953656	0.0285594	Down
S19	RFC2_MOUSE	19718	Rfc2	1.06174	0.925821	0.996975	0.771965	0.479993	0.413512	0.558034	0.0197414	0.0485709	Down
S796	INCE_MOUSE	16319	Incenp	0.254655	0.315779	0.284059	0.209706	0.108232	0.140525	0.536532	0.019118	0.0474114	Down
S799	INCE_MOUSE	16319	Incenp	0.254655	0.315779	0.284059	0.209706	0.108232	0.140525	0.536532	0.019118	0.0474114	Down
T800	INCE_MOUSE	16319	Incenp	0.254655	0.315779	0.284059	0.209706	0.108232	0.140525	0.536532	0.019118	0.0474114	Down
S1749	NCOR2_MOUSE	20602	Ncor2	0.589548	0.859012	0.753682	0.176818	0.43187	0.288292	0.407303	0.0156004	0.0407203	Down
T1406	NCOR2_MOUSE	20602	Ncor2	0.575589	0.594173	0.546023	0.271643	0.382748	0.397022	0.612789	0.00621918	0.0213118	Down
S215	NCOR2_MOUSE	20602	Ncor2	2.4494	2.68947	3.93454	1.77251	1.48065	1.65362	0.540787	0.0412434	0.0838938	Down
S31	STK11_MOUSE	20869	Stk11	3.73317	3.55816	3.67087	2.32101	2.37096	2.25889	0.634075	2.49906e-05	0.00125074	Down
T329	TFEB_MOUSE	21425	Tfeb	0.285615	0.229171	0.295973	0.208351	0.147307	0.153833	0.628412	0.0240437	0.0561047	Down
S256	TAF7_MOUSE	24074	Taf7	0.218505	0.338267	0.260738	0.133201	0.164888	0.172945	0.576181	0.0357908	0.075676	Down
S69	PCM1_MOUSE	18536	Pcm1	0.848233	0.712156	0.873727	0.362039	0.374134	0.362174	0.45123	0.000900056	0.00649	Down
S957	PCM1_MOUSE	18536	Pcm1	22.3267	22.4256	22.6283	13.1634	14.3703	13.8832	0.614671	1.80776e-05	0.0010538	Down
S384	PCM1_MOUSE	18536	Pcm1	1.43637	1.48728	1.4813	0.79217	0.68503	0.85841	0.530225	0.000201238	0.00309392	Down
S1855	PCM1_MOUSE	18536	Pcm1	1.16614	1.22135	1.08521	0.700726	0.710156	0.681811	0.602611	0.000339391	0.00384499	Down
T129	H2AY_MOUSE	26914	Macroh2a1	4.06355	4.10364	4.26788	2.44493	2.23654	2.32068	0.563097	3.14903e-05	0.00139309	Down
S350	NDRG2_MOUSE	29811	Ndrg2	9.01355	9.15878	10.2599	6.6503	5.91874	5.78748	0.645624	0.00213297	0.010707	Down
S677	ADDG_MOUSE	27360	Add3	1.07973	1.1469	1.35765	0.528235	0.85669	0.768374	0.600761	0.0208761	0.0506897	Down
S683	ADDG_MOUSE	27360	Add3	7.53642	6.04203	5.70599	3.63427	3.98914	4.29838	0.618208	0.0145055	0.0387317	Down
S329	NUFP1_MOUSE	27275	Nufip1	0.477966	0.94305	0.962305	0.349794	0.261119	0.255084	0.363357	0.0349736	0.074338	Down
S331	NUFP1_MOUSE	27275	Nufip1	0.477966	0.94305	0.962305	0.349794	0.261119	0.255084	0.363357	0.0349736	0.074338	Down
S333	NUFP1_MOUSE	27275	Nufip1	0.477966	0.94305	0.962305	0.349794	0.261119	0.255084	0.363357	0.0349736	0.074338	Down
S394	NUFP1_MOUSE	27275	Nufip1	7.48436	7.3792	7.76119	4.88253	4.9739	4.96849	0.655252	2.48629e-05	0.00125074	Down
T4370	PLEC_MOUSE	18810	Plec	0.575659	0.459645	0.521314	0.314278	0.251368	0.209753	0.49813	0.00451589	0.0171269	Down
S4381	PLEC_MOUSE	18810	Plec	0.575659	0.459645	0.521314	0.314278	0.251368	0.209753	0.49813	0.00451589	0.0171269	Down
S1970	MY18A_MOUSE	360013	Myo18a	1.83738	1.6232	1.85675	1.03501	1.01177	1.01833	0.576437	0.000564176	0.00506273	Down
S58	TOPK_MOUSE	52033	Pbk	0.573039	0.558112	0.596744	0.348552	0.305848	0.337779	0.574212	0.000135966	0.00250613	Down
T114	DDX21_MOUSE	56200	Ddx21	0.221041	0.26788	0.267663	0.135467	0.189575	0.113513	0.57965	0.0181169	0.0455212	Down
S13	DDX21_MOUSE	56200	Ddx21	2.31148	2.72428	2.67518	1.84213	1.72283	1.47636	0.653788	0.0062262	0.0213145	Down
S524	SELB_MOUSE	65967	Eefsec	0.291407	0.289829	0.280895	0.172291	0.191912	0.194589	0.648151	0.000199583	0.00308231	Down
S393	EXOS9_MOUSE	50911	Exosc9	0.666967	0.537323	0.745781	0.458375	0.333439	0.43785	0.630574	0.0290098	0.0645634	Down
S395	EXOS9_MOUSE	50911	Exosc9	0.666967	0.537323	0.745781	0.458375	0.333439	0.43785	0.630574	0.0290098	0.0645634	Down
S451	DKC1_MOUSE	245474	Dkc1	25.5333	31.5659	35.1039	17.484	17.0673	17.3543	0.562948	0.00862856	0.0266865	Down
S453	DKC1_MOUSE	245474	Dkc1	25.3191	31.4021	34.9081	17.2285	16.786	17.0157	0.556921	0.0084852	0.0264593	Down
S455	DKC1_MOUSE	245474	Dkc1	11.4977	18.2672	20.7046	6.85578	6.22919	6.56862	0.389416	0.0204458	0.0498922	Down
S1067	BRD4_MOUSE	57261	Brd4	2.05117	2.0045	1.95954	1.33691	0.989773	1.06584	0.56399	0.0012937	0.00797669	Down
S1073	BRD4_MOUSE	57261	Brd4	0.479105	0.432564	0.436752	0.266913	0.0759308	0.0736817	0.308899	0.00913752	0.0277425	Down
T1083	BRD4_MOUSE	57261	Brd4	0.479105	0.432564	0.436752	0.266913	0.0759308	0.0736817	0.308899	0.00913752	0.0277425	Down
T669	AFF4_MOUSE	93736	Aff4	1.18017	1.2252	1.01849	0.895107	0.761837	0.391885	0.598395	0.0482955	0.094916	Down
Y868	SHIP1_MOUSE	16331	Inpp5d	2.35696	2.49194	2.13373	1.26697	1.38726	1.36217	0.575198	0.000868488	0.00635329	Down
S1161	SHIP1_MOUSE	16331	Inpp5d	0.283676	0.337001	0.204987	0.155705	0.161925	0.139427	0.553563	0.034297	0.0732404	Down
S674	UBE4B_MOUSE	63958	Ube4b	1.34807	1.39212	1.50338	0.63778	0.605145	0.676142	0.45223	0.000105779	0.00221561	Down
S92	DGCR8_MOUSE	94223	Dgcr8	1.60683	1.40384	1.49875	0.806591	0.77612	0.832823	0.535663	0.00033048	0.00378947	Down
S8	DGCR8_MOUSE	94223	Dgcr8	0.896225	0.597353	0.687765	0.446716	0.250819	0.419305	0.511997	0.0300129	0.0663224	Down
S196	DTD1_MOUSE	66044	Dtd1	0.480214	0.600304	0.530635	0.258743	0.229061	0.226061	0.443077	0.00118864	0.00760073	Down
S197	DTD1_MOUSE	66044	Dtd1	0.480214	0.600304	0.530635	0.258743	0.229061	0.226061	0.443077	0.00118864	0.00760073	Down
T238	PUR6_MOUSE	67054	Paics	0.165066	0.152401	0.167549	0.102627	0.0897354	0.130959	0.66662	0.0144833	0.0387184	Down
S193	STR3N_MOUSE	76205	Stard3nl	1.7993	1.70987	1.78112	1.05844	0.952167	0.979443	0.565197	5.27238e-05	0.00175499	Down
S537	TJAP1_MOUSE	74094	Tjap1	0.7529	0.949811	0.710567	0.208265	0.308337	0.213215	0.302417	0.00223548	0.0110332	Down
S909	MYPT1_MOUSE	17931	Ppp1r12a	0.757026	0.673203	0.687341	0.237393	0.232861	0.18813	0.310915	8.8116e-05	0.00207633	Down
S445	MYPT1_MOUSE	17931	Ppp1r12a	3.63609	4.1193	4.18338	1.76013	1.72714	1.66434	0.431502	0.000206561	0.00311552	Down
S130	FA13C_MOUSE	71721	Fam13c	1.59477	1.46657	1.71896	0.970279	0.980656	0.873345	0.590817	0.00126178	0.00787261	Down
S72	AKAP8_MOUSE	56399	Akap8	0.352703	0.35586	0.370221	0.224966	0.167916	0.255302	0.600848	0.00538743	0.0193692	Down
T283	SRPRA_MOUSE	67398	Srpra	0.473086	0.374389	0.687117	0.207419	0.191077	0.253526	0.424883	0.0353946	0.0750467	Down
T397	PHKG2_MOUSE	68961	Phkg2	0.307602	0.306454	0.245034	0.194953	0.18707	0.178366	0.652305	0.00935554	0.0282355	Down
S81	BOLA1_MOUSE	69168	Bola1	4.97234	4.72892	4.32587	2.62665	2.5219	2.23071	0.52607	0.000572226	0.00510241	Down
T46	EF1G_MOUSE	67160	Eef1g	2.60826	2.48092	2.63155	1.19825	1.1909	1.57829	0.51387	0.000780533	0.00598002	Down
S235	FIP1_MOUSE	66899	Fip1l1	1.82862	1.77767	1.79864	1.13084	1.18408	1.15285	0.641594	7.16125e-06	0.000688769	Down
S21	ISCU_MOUSE	66383	Iscu	1.02736	1.04858	0.936329	0.362349	0.381431	0.382225	0.373806	5.66812e-05	0.00177625	Down
S213	YJU2_MOUSE	72886	Yju2	7.48887	8.0929	8.40085	5.24477	4.9466	5.50362	0.654432	0.000903687	0.00649742	Down
S39	SYAP1_MOUSE	67043	Syap1	0.593348	0.544758	0.467588	0.180472	0.326671	0.255412	0.474907	0.00733481	0.0238364	Down
S62	Q9D4G5_MOUSE	67724	Pop1	0.801816	0.786622	0.786949	0.417807	0.496414	0.507248	0.598416	0.00037361	0.00401596	Down
S403	UVSSA_MOUSE	71101	Uvssa	1.03914	1.03202	1.08716	0.719895	0.633608	0.652065	0.63501	0.000257047	0.00343581	Down
S236	CEP72_MOUSE	74470	Cep72	0.580948	0.481094	0.557346	0.333075	0.328648	0.34571	0.622108	0.00261899	0.0120526	Down
S20	STAG1_MOUSE	20842	Stag1	2.45787	2.43948	2.3969	1.63841	1.35396	1.57635	0.626346	0.000501534	0.00471188	Down
S24	STAG1_MOUSE	20842	Stag1	1.54717	1.58088	1.59553	1.08354	0.910919	0.996369	0.63317	0.000369532	0.00400643	Down
T55	SP2_MOUSE	78912	Sp2	0.1774	0.118011	0.156705	0.0951995	0.0973194	0.104541	0.657044	0.0427628	0.0862679	Down
S122	NH2L1_MOUSE	20826	Snu13	0.227463	0.215776	0.228526	0.126072	0.16273	0.0872672	0.559823	0.0112771	0.0321352	Down
T75	LSM12_MOUSE	268490	Lsm12	0.567167	0.525973	0.534157	0.36299	0.337337	0.356316	0.649324	0.000208518	0.00311552	Down
T34	MCES_MOUSE	67897	Rnmt	0.969763	0.991921	0.877936	0.390826	0.433886	0.432281	0.442662	0.000150231	0.00258179	Down
S100	MCES_MOUSE	67897	Rnmt	5.79032	5.77707	6.25059	2.85543	3.00429	2.79331	0.485634	5.35186e-05	0.00176431	Down
S411	HNRPM_MOUSE	76936	Hnrnpm	0.799466	0.771853	0.879016	0.493398	0.429159	0.166861	0.4446	0.0124094	0.0344381	Down
T64	TSTD3_MOUSE	77032	Tstd3	37.4954	37.5059	39.1026	24.7407	24.3913	23.6641	0.63798	2.45005e-05	0.00124445	Down
S217	SRSF9_MOUSE	108014	Srsf9	5.63099	5.49902	5.49182	3.69236	3.53261	3.44266	0.641784	2.07858e-05	0.00115161	Down
S83	MTREX_MOUSE	72198	Mtrex	0.32914	0.309386	0.244005	0.186561	0.234451	0.163707	0.662548	0.0400138	0.0819501	Down
S11	RRP15_MOUSE	67223	Rrp15	0.229907	0.249346	0.240241	0.112366	0.15173	0.130469	0.548392	0.00103294	0.00699197	Down
S25	PAIRB_MOUSE	66870	Serbp1	1.04432	0.999406	0.972776	0.650175	0.642138	0.574003	0.618702	0.000275832	0.00355338	Down
S14	SETD6_MOUSE	66083	Setd6	1.23029	1.16966	1.28007	0.745438	0.733343	0.738853	0.602615	0.000109867	0.00224641	Down
S268	ATX3_MOUSE	110616	Atxn3	0.360391	0.362942	0.347092	0.218221	0.17015	0.240078	0.587103	0.00226466	0.0111158	Down
S273	ATX3_MOUSE	110616	Atxn3	0.360391	0.362942	0.347092	0.218221	0.17015	0.240078	0.587103	0.00226466	0.0111158	Down
T137	CCD43_MOUSE	52715	Ccdc43	16.3821	16.8943	17.61	11.1504	11.2976	11.1942	0.661123	8.87011e-05	0.00208296	Down
S320	RETR3_MOUSE	67998	Retreg3	3.48896	3.20424	3.55024	2.15225	2.07126	2.20297	0.627375	0.000358017	0.00393618	Down
S73	DENR_MOUSE	68184	Denr	6.81976	6.14836	6.73185	4.09391	4.04355	3.75583	0.603721	0.000381623	0.00406966	Down
S89	BORG2_MOUSE	260409	Cdc42ep3	0.402918	0.427844	0.449776	0.216235	0.222838	0.212072	0.508494	0.000112121	0.00224641	Down
S82	MCRI2_MOUSE	68241	Mcrip2	4.21731	4.23935	4.23528	2.84715	2.27239	2.37848	0.590771	0.00060831	0.00523059	Down
S155	PKP2_MOUSE	-	-	4.11805	4.45222	4.21694	2.48321	1.99411	2.14563	0.517936	0.000302785	0.00366172	Down
S327	BAP1_MOUSE	104416	Bap1	0.289582	0.244589	0.257354	0.171786	0.148996	0.160599	0.608168	0.00227536	0.0111357	Down
S69	ZN318_MOUSE	57908	Znf318	0.202591	0.202971	0.216765	0.136462	0.125976	0.130373	0.631197	0.000162328	0.00272147	Down
S71	ZN318_MOUSE	57908	Znf318	0.202591	0.202971	0.216765	0.136462	0.125976	0.130373	0.631197	0.000162328	0.00272147	Down
S329	RTN4_MOUSE	68585	Rtn4	0.779262	0.797002	0.842096	0.443077	0.50569	0.50449	0.600927	0.000322095	0.00374976	Down
S289	PPIP2_MOUSE	19201	Pstpip2	2.02236	1.9781	1.89095	1.25901	1.31127	1.34734	0.664972	0.000142942	0.00253269	Down
S531	UBP16_MOUSE	74112	Usp16	0.530901	0.49903	0.549583	0.198815	0.196793	0.220639	0.390149	4.22657e-05	0.00156657	Down
S414	UBP16_MOUSE	74112	Usp16	1.18976	0.809658	1.14348	0.521322	0.447167	0.129065	0.349216	0.015909	0.04129	Down
S105	IF2B_MOUSE	67204	Eif2s2	2.75726	2.65366	2.64248	1.51988	1.82105	1.68179	0.623677	0.000431676	0.00436702	Down
S2	IF2B_MOUSE	67204	Eif2s2	0.289652	0.262588	0.230992	0.140559	0.169848	0.149994	0.587823	0.00481152	0.0178908	Down
S237	MLF2_MOUSE	30853	Mlf2	3.03709	2.94775	3.46886	2.01234	1.92282	2.0003	0.627844	0.00199214	0.0102476	Down
T279	LACB2_MOUSE	212442	Lactb2	4.9297	5.18633	5.10219	2.91964	2.62058	2.97226	0.559361	7.35393e-05	0.00195421	Down
S431	ARFG2_MOUSE	77038	Arfgap2	0.985058	0.994428	0.845166	0.267556	0.270621	0.272032	0.286835	0.000155057	0.00263175	Down
S411	GORS2_MOUSE	70231	Gorasp2	34.3961	37.9988	34.5078	23.4729	22.5038	22.5138	0.640681	0.000474318	0.0046068	Down
S205	PSIP1_MOUSE	101739	Psip1	0.496846	0.433653	0.456209	0.193175	0.132996	0.157615	0.348874	0.000292021	0.00360791	Down
S328	CLTR1_MOUSE	58861	Cysltr1	0.435353	0.464521	0.498621	0.222972	0.288148	0.304625	0.583302	0.00327627	0.0138723	Down
S16	ACATN_MOUSE	11416	Slc33a1	0.192191	0.19042	0.149764	0.09303	0.0926206	0.139586	0.610917	0.0296376	0.0656411	Down
S1021	MED1_MOUSE	19014	Med1	2.94972	3.26336	3.9821	1.45362	1.62913	2.18683	0.516869	0.0121239	0.0338768	Down
T753	CIC_MOUSE	71722	Cic	0.398254	0.330553	0.370625	0.170437	0.157895	0.219768	0.498531	0.00252154	0.0118426	Down
S353	WBP11_MOUSE	60321	Wbp11	0.955031	0.906315	0.919019	0.356845	0.472489	0.474177	0.468828	0.000288715	0.00360304	Down
S361	WBP11_MOUSE	60321	Wbp11	0.955031	0.906315	0.919019	0.356845	0.472489	0.474177	0.468828	0.000288715	0.00360304	Down
S364	WBP11_MOUSE	60321	Wbp11	0.955031	0.906315	0.919019	0.356845	0.472489	0.474177	0.468828	0.000288715	0.00360304	Down
T469	PRPF3_MOUSE	70767	Prpf3	2.94161	3.16445	3.36423	1.90289	2.04936	2.04199	0.632953	0.000902793	0.00649742	Down
S428	PDIA6_MOUSE	71853	Pdia6	15.4931	13.1603	13.6247	7.91044	9.12434	8.91285	0.613737	0.00249756	0.0117991	Down
S24	ANM3_MOUSE	71974	Prmt3	5.4365	5.44751	6.20975	3.4454	3.82334	3.91006	0.65397	0.00254063	0.0118672	Down
S328	TOIP1_MOUSE	208263	Tor1aip1	1.53041	1.49946	2.00412	1.01472	1.00935	0.999876	0.600706	0.0148372	0.0392358	Down
S543	DCP1A_MOUSE	75901	Dcp1a	0.240102	0.267007	0.261711	0.141342	0.20667	0.161846	0.663169	0.0146587	0.0389592	Down
S160	BASP1_MOUSE	70350	Basp1	0.276972	0.164589	0.316829	0.0813884	0.111754	0.122505	0.416207	0.0353273	0.0749967	Down
S40	PUS7_MOUSE	78697	Pus7	0.618303	0.51774	0.589822	0.392521	0.33167	0.36679	0.632135	0.00367056	0.0149585	Down
S7	PUS7_MOUSE	78697	Pus7	0.170302	0.236789	0.173985	0.133844	0.120127	0.132661	0.665374	0.0422246	0.085451	Down
T142	Q91VK2_MOUSE	66656	Eef1d	3.49766	3.70978	3.79177	2.31047	2.32654	2.37102	0.637139	0.000119161	0.00233454	Down
S412	5MP1_MOUSE	66912	Bzw2	1.04842	1.0087	1.24144	0.56118	0.466543	0.406918	0.43493	0.00184325	0.0098348	Down
S419	5MP1_MOUSE	66912	Bzw2	0.445302	0.50675	0.702916	0.339673	0.321803	0.254634	0.553552	0.0396356	0.0812987	Down
S414	5MP1_MOUSE	66912	Bzw2	0.603117	0.501952	0.538522	0.221507	0.14474	0.152284	0.315486	0.000613373	0.00525081	Down
S270	MK67I_MOUSE	67949	Nifk	3.02001	2.9214	2.67531	1.31396	1.87155	1.78639	0.577006	0.00380973	0.0152982	Down
T163	IF4A3_MOUSE	192170	Eif4a3	0.518283	0.403029	0.44359	0.280796	0.191013	0.230147	0.51429	0.00657283	0.0221871	Down
S3	SETD7_MOUSE	73251	Setd7	0.830625	1.00238	0.920915	0.104186	0.290827	0.418895	0.295545	0.00340135	0.0141781	Down
S408	GPSM2_MOUSE	76123	Gpsm2	1.8754	1.54966	1.44041	1.2372	1.03	0.822779	0.635084	0.0288132	0.0643732	Down
S674	CCAR2_MOUSE	219158	Ccar2	3.11445	3.33011	3.26379	2.16816	1.9694	1.6035	0.591354	0.0017242	0.00948882	Down
S719	HNRL1_MOUSE	232989	Hnrnpul1	2.19907	2.24035	2.57825	1.19321	1.0696	1.12489	0.482739	0.000643595	0.00537531	Down
S39	ESIP1_MOUSE	108670	Epsti1	0.577648	0.552284	0.631289	0.360178	0.33551	0.348531	0.592895	0.000604427	0.00523059	Down
T250	EVI2B_MOUSE	216984; 101488212	Evi2b	1.32519	1.54356	1.53668	0.782331	0.685668	0.772292	0.50853	0.000757128	0.00585729	Down
S35	PEX19_MOUSE	19298	Pex19	7.53244	6.75172	7.50711	2.37341	2.7453	2.45707	0.347652	7.12741e-05	0.00195421	Down
S513	KDM4C_MOUSE	76804	Kdm4c	0.573039	0.558112	0.596744	0.348552	0.305848	0.337779	0.574212	0.000135966	0.00250613	Down
T751	APOBR_MOUSE	171504	Apobr	1.12451	1.07943	1.0714	0.465712	0.475427	0.468802	0.430471	3.16256e-06	0.000454462	Down
S229	UBP15_MOUSE	14479	Usp15	5.38056	5.28146	4.80838	2.92882	2.941	3.01607	0.57438	0.000252071	0.00342947	Down
S235	NFAM1_MOUSE	74039	Nfam1	3.10908	2.80704	3.16328	1.71359	1.59907	1.92706	0.5771	0.000950502	0.00671723	Down
S96	NOP14_MOUSE	75416	Nop14	2.54762	2.61537	2.52086	1.6662	1.62466	1.58166	0.634124	1.48027e-05	0.000922746	Down
S311	AAGAB_MOUSE	66939	Aagab	1.49154	1.68031	1.59965	1.05119	0.85901	1.00786	0.61156	0.00150361	0.0087412	Down
S623	Q8R2P8_MOUSE	85305	Kars	0.472978	0.58221	0.610166	0.330068	0.373057	0.350225	0.632508	0.00949936	0.0285177	Down
S695	NIBA2_MOUSE	227737	Niban2	5.76783	4.02397	8.69713	1.22295	1.15619	1.14999	0.190878	0.0216396	0.0518609	Down
S178	EIF3C_MOUSE	56347	Eif3c	0.270938	0.357594	0.479114	0.225541	0.131564	0.140402	0.449158	0.0392608	0.0807636	Down
S181	EIF3C_MOUSE	56347	Eif3c	0.270938	0.357594	0.479114	0.225541	0.131564	0.140402	0.449158	0.0392608	0.0807636	Down
S182	EIF3C_MOUSE	56347	Eif3c	0.270938	0.357594	0.479114	0.225541	0.131564	0.140402	0.449158	0.0392608	0.0807636	Down
S373	BUD13_MOUSE	215051	Bud13	1.37269	1.45014	1.74282	0.969754	0.890701	1.06029	0.639722	0.0111478	0.0318965	Down
S623	INT13_MOUSE	71177	IntS13	2.98535	3.12998	2.99863	2.3189	1.89359	1.74639	0.653819	0.00408596	0.0159158	Down
S118	DCAF8_MOUSE	98193	Dcaf8	0.290559	0.252054	0.168608	0.0970804	0.0911441	0.0896403	0.390687	0.0160573	0.0415335	Down
S135	DCAF8_MOUSE	98193	Dcaf8	0.290559	0.252054	0.168608	0.0970804	0.0911441	0.0896403	0.390687	0.0160573	0.0415335	Down
S136	DCAF8_MOUSE	98193	Dcaf8	0.290559	0.252054	0.168608	0.0970804	0.0911441	0.0896403	0.390687	0.0160573	0.0415335	Down
S299	PITC1_MOUSE	71795	Pitpnc1	0.139031	0.109887	0.120415	0.0814496	0.0826588	0.0771464	0.653217	0.00794833	0.0252316	Down
T118	ALMS1_MOUSE	236266	Alms1	0.18955	0.248845	0.245539	0.108352	0.0992216	0.129468	0.492799	0.00551029	0.0196485	Down
S636	I2BPL_MOUSE	238330	Irf2bpl	9.66274	9.02432	11.4325	6.6618	6.54864	6.74342	0.662489	0.00937729	0.0282775	Down
S231	ZN131_MOUSE	72465	Znf131	0.550603	0.727306	0.735901	0.404429	0.329682	0.410269	0.568266	0.0116038	0.0327572	Down
S520	DEN1A_MOUSE	227801	Dennd1a	1.1271	1.21853	1.12022	0.53994	0.285425	0.495524	0.381116	0.001076	0.00717019	Down
S522	DEN1A_MOUSE	227801	Dennd1a	0.520789	0.515656	0.543399	0.31392	0.285425	0.340284	0.594761	0.000289	0.00360304	Down
S653	ANLN_MOUSE	68743	Anln	0.448891	0.512304	0.515059	0.312268	0.315698	0.311221	0.636196	0.00116798	0.0075555	Down
S549	UVRAG_MOUSE	78610	Uvrag	1.46063	1.53792	1.63433	0.971862	0.970182	1.00364	0.635821	0.000396551	0.00414078	Down
T44	PACS1_MOUSE	107975	Pacs1	0.5827	0.538475	0.335025	0.275981	0.21615	0.171791	0.455928	0.0322858	0.0700804	Down
S269	SDE2_MOUSE	208768	Sde2	5.89679	6.06041	6.05848	3.70718	4.05738	3.98405	0.652133	6.31332e-05	0.00189041	Down
S9	CDK17_MOUSE	237459	Cdk17	1.12406	1.12997	1.06874	0.517871	0.524178	0.44003	0.446036	5.13756e-05	0.00174397	Down
S180	CDK17_MOUSE	237459	Cdk17	0.634618	0.640147	0.621795	0.333102	0.28811	0.307125	0.489485	2.17501e-05	0.00116516	Down
T196	REEP4_MOUSE	72549	Reep4	0.99898	1.04198	1.55776	0.487927	0.537357	0.123435	0.319201	0.0212143	0.0511664	Down
T71	SPF45_MOUSE	76938	Rbm17	2.27786	2.22145	2.32778	1.26726	1.56691	1.68016	0.661238	0.00371453	0.0150981	Down
S88	EIF3B_MOUSE	27979	Eif3b	22.1187	24.5375	26.5354	12.4357	11.7007	11.9698	0.49331	0.000672315	0.00548007	Down
S84	EIF3B_MOUSE	27979	Eif3b	8.10008	8.06665	10.4332	5.42359	6.26769	5.53328	0.64754	0.0194511	0.047977	Down
T1789	ELYS_MOUSE	226747	Ahctf1	0.525034	0.440148	0.510086	0.254648	0.308673	0.329268	0.605035	0.00481761	0.0178908	Down
S1507	ELYS_MOUSE	226747	Ahctf1	0.786248	0.968385	0.924327	0.577195	0.56953	0.561818	0.637763	0.00418896	0.0162098	Down
S194	OSB11_MOUSE	106326	Osbpl11	0.571858	0.515454	0.63964	0.290074	0.297429	0.266215	0.494349	0.00142773	0.00846839	Down
S31	DI3L2_MOUSE	208718	Dis3l2	0.351589	0.316267	0.308	0.184322	0.187191	0.191153	0.576588	0.000521932	0.00481681	Down
S12	DI3L2_MOUSE	208718	Dis3l2	0.658202	0.705312	0.554674	0.372038	0.278254	0.209252	0.448102	0.00553567	0.019698	Down
S561	VPS50_MOUSE	73288	Vps50	0.65791	0.999911	1.08796	0.511374	0.482348	0.565028	0.56769	0.0412844	0.0839523	Down
S505	GNL3_MOUSE	30877	Gnl3	11.584	11.8606	13.4428	6.62709	6.51818	6.54657	0.533836	0.000588149	0.00519039	Down
S394	NAV1_MOUSE	215690	Nav1	1.0778	1.07938	1.14215	0.768901	0.675403	0.723028	0.6569	0.000388765	0.00411151	Down
S939	SLTM_MOUSE	66660	Sltm	1.12971	0.882037	0.922309	0.513322	0.453373	0.494219	0.497916	0.00336897	0.0140964	Down
S699	DEN1C_MOUSE	70785	Dennd1c	1.22132	1.33598	1.39701	1.06686	0.382813	0.26222	0.432918	0.0431443	0.0868586	Down
T526	NUP88_MOUSE	19069	Nup88	4.23549	4.21587	4.17673	2.63227	2.73077	2.85059	0.650425	2.31707e-05	0.00121284	Down
S352	LENG8_MOUSE	232798	Leng8	0.796687	0.846599	0.889992	0.55854	0.488212	0.527164	0.621296	0.000693786	0.00553817	Down
S216	ABI1_MOUSE	11308	Abi1	0.22157	0.30481	0.255403	0.174262	0.17244	0.173339	0.665199	0.0225763	0.0534575	Down
S82	ELOA1_MOUSE	27224	Eloa	4.48522	4.53406	4.15515	3.07108	2.86173	2.63464	0.650309	0.000896284	0.00648573	Down
S957	LIPB1_MOUSE	67533	Ppfibp1	0.316537	0.331236	0.358115	0.176959	0.205631	0.252986	0.631856	0.00815487	0.0257686	Down
S961	LIPB1_MOUSE	67533	Ppfibp1	0.316537	0.331236	0.358115	0.176959	0.205631	0.252986	0.631856	0.00815487	0.0257686	Down
S1729	DOCK2_MOUSE	94176	Dock2	3.07123	2.97805	2.95357	1.71468	1.645	1.49653	0.539408	4.74392e-05	0.00167675	Down
S662	CND2_MOUSE	215387	Ncaph	0.394014	0.450862	0.523389	0.237212	0.198009	0.177008	0.447449	0.00367796	0.0149672	Down
S14	ARH_MOUSE	100017	Ldlrap1	1.46029	1.43226	1.35509	0.651218	0.652104	0.579483	0.443259	3.75893e-05	0.00150782	Down
T38	TLK1_MOUSE	228012	Tlk1	1.29681	1.29204	1.1425	0.689615	0.89151	0.754656	0.625989	0.00399635	0.0156518	Down
S467	ZN609_MOUSE	214812	Znf609	2.65906	2.61685	2.6497	1.29957	1.22204	1.11034	0.458253	1.43142e-05	0.000908821	Down
S757	ZN609_MOUSE	214812	Znf609	2.77819	2.31016	2.61886	1.11417	1.40246	1.23389	0.486626	0.00120482	0.00763836	Down
S491	ZN609_MOUSE	214812	Znf609	0.347201	0.399919	0.365373	0.114954	0.252299	0.075521	0.398002	0.0160854	0.0415904	Down
S358	ZN609_MOUSE	214812	Znf609	0.534662	0.682443	0.703307	0.304493	0.265339	0.222054	0.412352	0.00294638	0.0130337	Down
S2302	CHD9_MOUSE	109151	Chd9	0.642552	0.640248	0.685804	0.26781	0.236159	0.303705	0.410277	9.38673e-05	0.00212235	Down
S299	FA53C_MOUSE	66306	Fam53c	0.397726	0.387556	0.332775	0.20578	0.238138	0.19692	0.573172	0.00258244	0.0119728	Down
S1015	KPB2_MOUSE	110094	Phka2	0.489497	0.529726	0.538861	0.27202	0.2409	0.275416	0.505965	0.000164242	0.00273351	Down
T399	RL1D1_MOUSE	66409	Rsl1d1	0.391344	0.404586	0.422809	0.237346	0.293296	0.23571	0.628808	0.00199621	0.0102514	Down
S333	Q8BVV6_MOUSE	217869	Eif5	0.980107	0.951226	1.08267	0.542329	0.283019	0.451514	0.423643	0.0025131	0.0118192	Down
S334	Q8BVV6_MOUSE	217869	Eif5	0.980107	0.951226	1.08267	0.542329	0.283019	0.451514	0.423643	0.0025131	0.0118192	Down
S437	SNX17_MOUSE	266781	Snx17	0.95483	1.00462	1.00776	0.520444	0.462973	0.488091	0.495922	3.11436e-05	0.0013867	Down
S440	SNX17_MOUSE	266781	Snx17	0.324448	0.362423	0.331864	0.189238	0.204421	0.206665	0.589284	0.000408392	0.00419968	Down
S421	SNX17_MOUSE	266781	Snx17	1.05797	0.94988	1.08346	0.259759	0.274006	0.297751	0.268985	5.90832e-05	0.00182493	Down
S226	SP110_MOUSE	109032	Sp110	1.77698	1.73331	1.37769	0.83466	1.22345	0.90965	0.607155	0.0211112	0.0510075	Down
S277	SP110_MOUSE	109032	Sp110	1.78896	2.33166	1.8052	1.22265	1.29439	1.36753	0.655533	0.0205433	0.050041	Down
T1844	DOCK1_MOUSE	330662	Dock1	0.375595	0.353407	0.352902	0.220504	0.238331	0.226137	0.633117	0.000132735	0.00246657	Down
T1750	FLNA_MOUSE	192176	Flna	0.669236	0.828453	0.767773	0.400569	0.326372	0.320796	0.462483	0.00156682	0.00901117	Down
T841	SRRM2_MOUSE	75956	Srrm2	0.869367	0.831899	0.776614	0.344943	0.194475	0.278949	0.330269	0.000416443	0.00424301	Down
S433	SRRM2_MOUSE	75956	Srrm2	18.8724	19.373	21.7161	12.3415	12.6448	12.9279	0.632308	0.00118682	0.00760073	Down
S434	SRRM2_MOUSE	75956	Srrm2	18.8724	19.373	21.7161	12.3415	12.6448	12.9279	0.632308	0.00118682	0.00760073	Down
T2021	SRRM2_MOUSE	75956	Srrm2	25.0956	26.7753	28.1846	14.7694	15.5912	14.6256	0.561937	0.000242574	0.00338075	Down
S1982	SRRM2_MOUSE	75956	Srrm2	6.69777	7.49015	7.60252	3.15473	3.1109	2.89473	0.420385	0.000141591	0.00251525	Down
S40	CEP55_MOUSE	74107	Cep55	0.16273	0.187659	0.168015	0.112078	0.0824312	0.106956	0.581525	0.00368678	0.0149942	Down
T62	Q8BSH9_MOUSE	53605	Nap1l1	2.54062	2.48352	2.1834	1.56139	1.49975	1.51946	0.635529	0.00145786	0.00859548	Down
S300	SCFD1_MOUSE	76983	Scfd1	4.93935	4.75044	5.04248	2.92349	3.163	3.06874	0.62144	7.2622e-05	0.00195421	Down
S65	F177A_MOUSE	100101807; 73385	Fam177a1	2.77651	2.78717	2.78743	1.92423	1.82252	1.37517	0.613322	0.00309451	0.0133765	Down
T66	F177A_MOUSE	100101807; 73385	Fam177a1	2.77651	2.78717	2.78743	1.92423	1.82252	1.37517	0.613322	0.00309451	0.0133765	Down
S1180	TICRR_MOUSE	77011	Ticrr	0.666561	0.651973	0.761056	0.372294	0.394981	0.425951	0.57378	0.0014116	0.00844623	Down
S820	TICRR_MOUSE	77011	Ticrr	0.40564	0.378224	0.404728	0.233631	0.238944	0.297247	0.647676	0.00330746	0.0139393	Down
S1369	TICRR_MOUSE	77011	Ticrr	0.3172	0.26263	0.284647	0.188456	0.198491	0.17061	0.644965	0.00456551	0.0172199	Down
S95	KBTBB_MOUSE	74901	Kbtbd11	2.51638	2.74971	2.93348	1.70387	1.5795	1.73117	0.611562	0.00120259	0.00763836	Down
S107	KBTBB_MOUSE	74901	Kbtbd11	2.51638	2.74971	2.93348	1.70387	1.5795	1.73117	0.611562	0.00120259	0.00763836	Down
S205	HIRP3_MOUSE	233876	Hirip3	2.10913	2.78303	3.49405	1.04935	1.02292	0.92289	0.357153	0.0110439	0.0317784	Down
S207	HIRP3_MOUSE	233876	Hirip3	2.10913	2.78303	3.49405	1.04935	1.02292	0.92289	0.357153	0.0110439	0.0317784	Down
S208	HIRP3_MOUSE	233876	Hirip3	2.10913	2.78303	3.49405	1.04935	1.02292	0.92289	0.357153	0.0110439	0.0317784	Down
S564	HIRP3_MOUSE	233876	Hirip3	1.87222	1.73941	1.79457	1.22562	1.10666	1.04996	0.625621	0.000472718	0.00459777	Down
S913	TNR6B_MOUSE	213988	Tnrc6b	0.362378	0.345837	0.351838	0.207813	0.214186	0.191545	0.578786	5.67171e-05	0.00177625	Down
S118	SMAL1_MOUSE	54380	Smarcal1	0.362718	0.411815	0.376447	0.23048	0.131687	0.284966	0.562246	0.0235968	0.0553308	Down
S175	BOREA_MOUSE	52276	Cdca8	0.419704	0.379216	0.459419	0.256025	0.295687	0.245364	0.633436	0.00519297	0.0188503	Down
S189	PSMF1_MOUSE	228769	Psmf1	0.807896	0.832944	0.749218	0.231124	0.139324	0.265838	0.266222	0.000205534	0.00311552	Down
S177	WBP1L_MOUSE	226178	Wbp1l	0.292388	0.450128	0.422343	0.182767	0.194595	0.251595	0.539942	0.0281239	0.0632073	Down
S119	SPE39_MOUSE	104799	Vipas39	2.4704	2.56043	2.39399	1.48269	1.53955	1.6488	0.629111	0.000179115	0.00290353	Down
S542	IF4B_MOUSE	75705	Eif4b	0.477717	0.53519	0.510727	0.381129	0.310166	0.259006	0.623707	0.0081359	0.0257324	Down
T800	TET3_MOUSE	194388	Tet3	1.2608	1.11792	0.968394	0.784082	0.679285	0.746804	0.660322	0.0134829	0.0367311	Down
S14	ROA3_MOUSE	229279	Hnrnpa3	21.2714	20.8513	21.1822	10.0214	9.94106	10.3287	0.478497	3.74643e-07	0.000232482	Down
S111	DDX42_MOUSE	72047	Ddx42	0.868003	0.847798	0.574364	0.539763	0.380971	0.282629	0.525448	0.0399255	0.0818197	Down
S655	RHGBA_MOUSE	228482	Arhgap11a	0.311748	0.376927	0.314442	0.190147	0.0937284	0.116149	0.39878	0.00508534	0.0185644	Down
S30	NUCKS_MOUSE	98415	Nucks1	0.432348	0.457481	0.531816	0.25489	0.279746	0.255137	0.555534	0.00244464	0.011649	Down
S191	FA76B_MOUSE	72826	Fam76b	1.62163	1.68923	1.81456	0.467157	0.497797	0.488813	0.283639	2.8305e-05	0.00131532	Down
S1015	ATG2B_MOUSE	76559	Atg2b	0.748359	0.641875	0.634914	0.329576	0.302065	0.313715	0.466808	0.000663055	0.00543198	Down
S1017	ATG2B_MOUSE	76559	Atg2b	0.748359	0.641875	0.634914	0.329576	0.302065	0.313715	0.466808	0.000663055	0.00543198	Down
S496	ATG2B_MOUSE	76559	Atg2b	4.02665	3.98348	4.06274	2.3267	2.35392	2.25567	0.574536	1.33037e-06	0.000325799	Down
S379	ATG2B_MOUSE	76559	Atg2b	0.473046	0.402706	0.385637	0.277309	0.271602	0.25053	0.633778	0.00530371	0.0191429	Down
S482	UBP2L_MOUSE	74383	Ubap2l	1.50991	1.59659	2.09369	1.07253	1.09789	1.08228	0.625497	0.0234531	0.0550827	Down
S293	RHDF2_MOUSE	217344	Rhbdf2	0.949485	0.89936	0.889794	0.574569	0.549758	0.524754	0.602154	0.000101264	0.00218354	Down
S13	UBN2_MOUSE	320538	Ubn2	0.481479	0.434246	0.437515	0.251437	0.267621	0.253278	0.570731	0.000271687	0.00353502	Down
S385	ANKZ1_MOUSE	52231	Ankzf1	1.47875	1.22628	1.08202	0.390472	0.615265	0.584279	0.419856	0.00568991	0.0200183	Down
S1098	RERE_MOUSE	68703	Rere	1.21881	1.18598	1.22431	0.167491	0.228489	0.183903	0.159787	1.26631e-06	0.000325799	Down
S1105	RERE_MOUSE	68703	Rere	1.21881	1.18598	1.22431	0.167491	0.228489	0.183903	0.159787	1.26631e-06	0.000325799	Down
S1107	RERE_MOUSE	68703	Rere	1.21881	1.18598	1.22431	0.167491	0.228489	0.183903	0.159787	1.26631e-06	0.000325799	Down
S679	RERE_MOUSE	68703	Rere	4.89516	4.8953	5.58502	1.86097	2.32024	2.51394	0.435443	0.000651329	0.00541353	Down
S675	RERE_MOUSE	68703	Rere	0.918561	0.925344	0.952715	0.319299	0.28471	0.333819	0.335343	4.17539e-06	0.000502292	Down
S600	RERE_MOUSE	68703	Rere	7.04504	7.30841	7.98619	3.07512	2.74811	3.00268	0.395078	0.000110687	0.00224641	Down
S268	KANL1_MOUSE	76719	Kansl1	0.14783	0.254503	0.208244	0.0860053	0.0876833	0.0570115	0.37784	0.0175076	0.0444462	Down
S1406	SI1L2_MOUSE	244668	Sipa1l2	0.822346	0.73626	0.828367	0.475496	0.541672	0.525971	0.646484	0.00142193	0.0084506	Down
S273	MCPH1_MOUSE	244329	Mcph1	0.342613	0.428944	0.409522	0.20579	0.168735	0.151694	0.445542	0.00205174	0.0104213	Down
S353	REXO1_MOUSE	66932	Rexo1	4.01349	4.22155	4.32162	2.74261	2.81343	2.54099	0.644839	0.000260814	0.0034659	Down
S745	PP6R1_MOUSE	243819	Ppp6r1	0.591587	0.557446	0.567205	0.411212	0.36729	0.354735	0.660303	0.00061662	0.00525891	Down
S830	CTDP1_MOUSE	67655	Ctdp1	0.662955	0.733677	0.676553	0.326826	0.350109	0.309703	0.475904	0.000124422	0.0023802	Down
S502	CTDP1_MOUSE	67655	Ctdp1	2.03985	1.83873	1.98859	0.84167	0.970373	0.835116	0.451182	0.000136326	0.00250613	Down
S322	LR75A_MOUSE	192976	Lrrc75a	1.88428	1.9958	1.85802	1.14786	1.17131	1.0794	0.592282	0.000102128	0.00219528	Down
T1256	MBB1A_MOUSE	18432	Mybbp1a	0.40028	0.524648	0.528835	0.268905	0.285636	0.280067	0.574102	0.00827305	0.0260222	Down
S2992	MYCB2_MOUSE	105689	Mycbp2	0.344571	0.302897	0.279197	0.103896	0.134605	0.134555	0.402579	0.00104375	0.00703046	Down
S2943	MYCB2_MOUSE	105689	Mycbp2	3.47544	3.53543	3.69246	1.62919	1.56627	1.5183	0.440402	1.01896e-05	0.000812444	Down
S2861	MYCB2_MOUSE	105689	Mycbp2	3.09936	2.89867	3.08113	1.31583	1.29834	1.24507	0.425064	1.34661e-05	0.000882057	Down
S3922	HUWE1_MOUSE	59026	Huwe1	5.54172	5.55065	6.84477	4.04864	3.976	3.88941	0.66421	0.00993972	0.0293652	Down
T3927	HUWE1_MOUSE	59026	Huwe1	1.83604	1.71914	3.26094	0.907674	0.766298	0.773159	0.359021	0.0429878	0.0866941	Down
T3930	HUWE1_MOUSE	59026	Huwe1	1.44924	1.40614	1.1114	0.491638	0.418921	0.448067	0.342501	0.00130422	0.00799916	Down
S1368	HUWE1_MOUSE	59026	Huwe1	0.540697	0.510977	0.530911	0.340068	0.35252	0.334154	0.648775	5.57981e-05	0.00177625	Down
S30	ERI1_MOUSE	67276	Eri1	19.7426	19.2349	18.8851	12.5983	11.9995	12.2931	0.63756	2.09345e-05	0.00115161	Down
T2131	Q7M739_MOUSE	108989	Tpr	0.565542	0.594832	0.511997	0.283771	0.279986	0.245283	0.483768	0.000449622	0.00447468	Down
T235	SND1_MOUSE	56463	Snd1	0.542929	0.543482	0.570729	0.337724	0.353885	0.381873	0.647792	0.000251616	0.00342947	Down
S3395	UBP34_MOUSE	17847	Usp34	0.629438	0.799214	0.791819	0.295098	0.302592	0.30451	0.40631	0.00137472	0.00832725	Down
S3396	UBP34_MOUSE	17847	Usp34	0.300833	0.328173	0.280988	0.115728	0.117702	0.109814	0.377194	0.000168818	0.0027961	Down
S16	WDR90_MOUSE	106618	Wdr90	0.259823	0.282736	0.345432	0.171119	0.189462	0.152936	0.578291	0.0107366	0.0310638	Down
S815	CENPE_MOUSE	229841	Cenpe	0.0931445	0.128831	0.132963	0.0855896	0.0707911	0.0541312	0.593094	0.0364869	0.0766516	Down
S97	JUPI2_MOUSE	52009	Jpt2	0.573781	0.67076	0.557313	0.398987	0.355305	0.353399	0.614751	0.00382066	0.0153027	Down
S805	Q6PGF5_MOUSE	213895	Bms1	2.33428	2.09232	2.33565	1.3284	1.44867	1.32393	0.606455	0.000610215	0.00523059	Down
T1771	NUP98_MOUSE	269966	Nup98	1.21681	1.19792	1.16031	0.710652	0.599904	0.667204	0.553214	0.00012495	0.0023802	Down
T522	CHD4_MOUSE	107932	Chd4	1.24422	1.43758	1.31667	0.767759	0.765656	0.704797	0.559767	0.000615149	0.0052529	Down
S524	CHD4_MOUSE	107932	Chd4	20.1987	20.5621	20.9177	11.8103	13.1681	12.2412	0.603447	5.51329e-05	0.00177625	Down
S18	SHB_MOUSE	230126	Shb	0.944643	0.785385	0.968825	0.517216	0.503596	0.547883	0.581245	0.00309001	0.0133765	Down
S21	HLTF_MOUSE	20585	Hltf	0.573753	0.735194	0.600041	0.425216	0.401372	0.412353	0.649004	0.0114737	0.0325372	Down
S101	KDM3A_MOUSE	104263	Kdm3a	0.756557	0.945321	1.11774	0.430938	0.314601	0.507151	0.444277	0.0115798	0.0327069	Down
Y116	KDM3A_MOUSE	104263	Kdm3a	0.756557	0.945321	1.11774	0.430938	0.314601	0.507151	0.444277	0.0115798	0.0327069	Down
T1079	DEN5A_MOUSE	19347	Dennd5a	0.631563	0.618776	0.502778	0.119539	0.408521	0.307946	0.476868	0.0313962	0.0686273	Down
S1157	FKB15_MOUSE	338355	Fkbp15	0.456535	0.541454	0.619811	0.215337	0.207052	0.176334	0.370084	0.00220718	0.0109354	Down
T925	KIF11_MOUSE	16551	Kif11	1.19851	1.20075	1.29137	0.748155	0.665706	0.667872	0.564058	0.000195039	0.00303261	Down
S373	UBXN7_MOUSE	224111	Ubxn7	3.51089	3.12432	3.22028	2.08707	2.24221	2.22701	0.665243	0.00095707	0.00675167	Down
S391	XPO1_MOUSE	103573	Xpo1	0.941079	0.735908	0.736561	0.496007	0.59164	0.466955	0.644115	0.021361	0.0514299	Down
S26	DGKQ_MOUSE	110524	Dgkq	0.260466	0.274417	0.336043	0.193793	0.186933	0.169511	0.631783	0.0117295	0.0330304	Down
S22	ABCF1_MOUSE	224742	Abcf1	0.693998	0.562852	0.684395	0.475866	0.373552	0.43518	0.661739	0.0132713	0.0362411	Down
S225	U520_MOUSE	320632	Snrnp200	0.634821	0.637493	0.747721	0.448655	0.433042	0.418886	0.643842	0.00327943	0.0138723	Down
S674	SIK3_MOUSE	70661	Sik3	0.31293	0.343461	0.349343	0.200128	0.19561	0.22622	0.618412	0.000979671	0.00683121	Down
S221	Q6NZR5_MOUSE	108077	Skiv2l	1.60088	1.57187	1.51062	0.982946	0.996402	1.01576	0.639521	3.75081e-05	0.00150782	Down
S115	PBIR2_MOUSE	78755	Pabir2	0.554068	0.516396	0.565174	0.373287	0.336129	0.371488	0.660846	0.000635037	0.00534944	Down
S119	PBIR2_MOUSE	78755	Pabir2	0.703352	0.666975	0.743644	0.537362	0.49701	0.371488	0.665033	0.0124424	0.0344578	Down
T742	RPRD2_MOUSE	75137	Rprd2	2.03816	2.08393	2.10403	1.3311	1.11628	1.29973	0.601838	0.000290989	0.00360791	Down
S942	HELB_MOUSE	117599	Helb	0.941051	0.834392	1.02262	0.685793	0.636409	0.426506	0.62497	0.0221716	0.0528987	Down
S402	HELB_MOUSE	117599	Helb	1.72148	2.3069	2.39296	1.24717	1.12417	0.580897	0.459755	0.0170453	0.0434981	Down
S1026	HELB_MOUSE	117599	Helb	0.78985	0.774213	0.842471	0.24141	0.232008	0.233986	0.293951	1.09066e-05	0.000849847	Down
S1015	HELB_MOUSE	117599	Helb	2.37802	2.34335	2.35852	1.51542	1.58225	1.52095	0.652357	4.12063e-06	0.000502292	Down
T274	RETR2_MOUSE	227298	Retreg2	2.69021	2.59516	2.31801	1.69901	1.61696	1.52999	0.637343	0.0016544	0.00927156	Down
S276	RETR2_MOUSE	227298	Retreg2	2.69021	2.59516	2.31801	1.69901	1.61696	1.52999	0.637343	0.0016544	0.00927156	Down
S583	CCD66_MOUSE	320234	Ccdc66	0.425343	0.443356	0.545171	0.288954	0.285989	0.206373	0.552608	0.0102143	0.0299057	Down
S330	CEP78_MOUSE	208518	Cep78	0.180239	0.206484	0.152245	0.11224	0.0842869	0.128021	0.602164	0.0241168	0.0562264	Down
S1636	HELZ_MOUSE	78455	Helz	0.408913	0.387152	0.368803	0.233468	0.295669	0.237334	0.65799	0.0046257	0.0173895	Down
S19	UBP7_MOUSE	252870	Usp7	4.54461	4.70445	4.90197	3.24387	3.09924	2.89052	0.652506	0.00035471	0.00391666	Down
S1021	F120A_MOUSE	218236	FAM120A	0.460102	0.406447	0.480963	0.197514	0.234661	0.203105	0.471447	0.000688986	0.00552047	Down
S518	LAR4B_MOUSE	217980	Larp4b	0.632298	0.585074	0.710243	0.357166	0.492727	0.385579	0.640933	0.0138331	0.0374175	Down
T520	LAR4B_MOUSE	217980	Larp4b	0.632298	0.585074	0.710243	0.357166	0.492727	0.385579	0.640933	0.0138331	0.0374175	Down
T1047	CE170_MOUSE	545389	Cep170	0.781151	0.629636	0.602352	0.292679	0.335453	0.195616	0.409185	0.00462263	0.0173877	Down
S1528	CE170_MOUSE	545389	Cep170	0.331807	0.306721	0.325358	0.115728	0.182847	0.173374	0.489632	0.00181592	0.00978711	Down
S1529	CE170_MOUSE	545389	Cep170	0.331807	0.306721	0.325358	0.115728	0.182847	0.173374	0.489632	0.00181592	0.00978711	Down
S1188	CE170_MOUSE	545389	Cep170	2.5818	2.61566	2.91946	1.715	1.73302	1.75055	0.64046	0.000836591	0.00620163	Down
S1102	CE170_MOUSE	545389	Cep170	4.06759	4.1028	4.02024	2.43594	2.22882	2.45947	0.584402	2.56802e-05	0.00125074	Down
S633	HECD1_MOUSE	207304	Hectd1	3.29877	3.13842	3.09975	1.44799	1.38737	0.959055	0.397865	0.000319182	0.00373949	Down
S316	CDK13_MOUSE	69562	Cdk13	0.480953	0.490727	0.620428	0.244946	0.279885	0.286213	0.509415	0.00509189	0.0185644	Down
S326	CDK13_MOUSE	69562	Cdk13	0.480953	0.490727	0.620428	0.244946	0.279885	0.286213	0.509415	0.00509189	0.0185644	Down
S1410	PEAK1_MOUSE	244895	Peak1	0.334963	0.523475	0.472781	0.222498	0.301527	0.287717	0.609774	0.0477501	0.0942224	Down
S291	Q68FM7_MOUSE	213498	Arhgef11	0.842059	0.832094	0.880137	0.572192	0.531995	0.522019	0.636656	0.000128277	0.00241682	Down
S160	CEP43_MOUSE	75296	Cep43	3.12371	2.82125	2.92889	2.03949	1.96184	1.86873	0.661501	0.000589012	0.00519133	Down
S32	KNL1_MOUSE	76464	Knl1	0.204081	0.220004	0.236577	0.161668	0.122922	0.112998	0.601802	0.00752908	0.0242962	Down
S1376	TOP2B_MOUSE	21974	Top2b	0.147495	0.158867	0.138677	0.0710788	0.0683948	0.0996437	0.537296	0.00406117	0.0158561	Down
S1026	TIF1A_MOUSE	21848	Trim24	0.556321	0.546202	0.708204	0.432956	0.274776	0.291741	0.551973	0.0203171	0.0496311	Down
S1029	TIF1A_MOUSE	21848	Trim24	0.556321	0.546202	0.708204	0.432956	0.274776	0.291741	0.551973	0.0203171	0.0496311	Down
S812	TIF1A_MOUSE	21848	Trim24	3.17089	3.07441	3.29701	1.96036	1.51714	2.20915	0.595941	0.00376336	0.0152301	Down
S875	RHG30_MOUSE	226652	Arhgap30	0.900592	0.879476	0.784574	0.485859	0.501076	0.432682	0.553534	0.000759575	0.00586532	Down
S29	UT14A_MOUSE	72554	Utp14a	1.11019	1.48746	1.44833	0.431025	0.0565953	0.173111	0.163305	0.00228726	0.0111549	Down
S37	UT14A_MOUSE	72554	Utp14a	1.11019	1.48746	1.44833	0.431025	0.0565953	0.173111	0.163305	0.00228726	0.0111549	Down
T268	RALY_MOUSE	19383	Raly	0.380875	0.504619	0.529569	0.256387	0.324602	0.319987	0.636703	0.0282531	0.0633583	Down
S270	RALY_MOUSE	19383	Raly	21.1242	23.924	25.3193	13.4181	13.9327	13.079	0.57455	0.00136774	0.0082923	Down
T274	RALY_MOUSE	19383	Raly	5.17804	7.38899	8.61913	2.45015	2.48506	2.42644	0.347475	0.0102084	0.0299014	Down
Y205	MK03_MOUSE	26417	Mapk3	3.45131	4.0421	3.63784	2.34214	2.42195	2.33526	0.637786	0.0015991	0.00910685	Down
S85	ZFP91_MOUSE	109910	Zfp91	1.57298	2.26622	2.12524	0.796922	0.778751	0.760696	0.391716	0.0046519	0.0174497	Down
S106	ZFP91_MOUSE	109910	Zfp91	15.1309	17.0574	18.2685	10.5088	10.6557	10.6742	0.631008	0.00246717	0.0117075	Down
S1682	MINT_MOUSE	56381	Spen	0.907996	0.882727	0.899972	0.553354	0.523046	0.571493	0.612441	2.64097e-05	0.00126389	Down
T375	NDRG1_MOUSE	17988	Ndrg1	0.399117	0.443995	0.494426	0.302221	0.25834	0.316625	0.655821	0.00929489	0.0280771	Down
S82	ARI3A_MOUSE	13496	Arid3a	1.06252	0.939419	0.988655	0.677065	0.555149	0.618516	0.618851	0.00163208	0.00921649	Down
S226	RU17_MOUSE	20637	Snrnp70	158.39	156.666	154.016	105.351	102.385	100.907	0.657986	8.05342e-06	0.000721813	Down
S828	TIF1B_MOUSE	21849	Trim28	0.749171	0.777507	0.778291	0.129858	0.120056	0.115204	0.158405	4.17031e-07	0.000232482	Down
S653	TAF6_MOUSE	21343	Taf6	0.536613	0.457868	0.440367	0.277976	0.357746	0.265802	0.628306	0.0126239	0.0348619	Down
S816	SEM4B_MOUSE	20352	Sema4b	0.197172	0.213862	0.255811	0.0805988	0.0855502	0.0856377	0.377579	0.0013916	0.00838672	Down
T232	NPM_MOUSE	18148	Npm1	0.55346	0.558016	0.667257	0.172084	0.255801	0.192497	0.348777	0.0010074	0.00691091	Down
T235	NPM_MOUSE	18148	Npm1	0.55346	0.558016	0.667257	0.172084	0.255801	0.192497	0.348777	0.0010074	0.00691091	Down
S497	MELK_MOUSE	17279	Melk	0.240582	0.244303	0.32717	0.12698	0.140069	0.173042	0.541947	0.0168542	0.0430907	Down
S134	LASP1_MOUSE	16796	Lasp1	0.827494	0.594627	0.54873	0.420932	0.376336	0.342782	0.578456	0.036076	0.076036	Down
S644	ATRX_MOUSE	22589	Atrx	0.769632	0.87749	0.732451	0.334251	0.275462	0.312398	0.387511	0.000484436	0.00463288	Down
S801	ATRX_MOUSE	22589	Atrx	0.265804	0.260356	0.299134	0.155382	0.183606	0.180545	0.629512	0.00248829	0.0117914	Down
S438	FXR1_MOUSE	14359	Fxr1	0.549539	0.632433	0.612442	0.334078	0.259895	0.377422	0.541344	0.00295003	0.0130337	Down
T90	TRI25_MOUSE	217069	Trim25	0.13048	0.117738	0.132559	0.105058	0.0746624	0.067733	0.649863	0.0228682	0.0540155	Down
S67	HTF4_MOUSE	21406	Tcf12	0.4384	0.462895	0.440059	0.210171	0.261824	0.257021	0.543493	0.00036564	0.00398478	Down
S155	MARE1_MOUSE	13589	Mapre1	2.2188	2.23142	2.64966	0.928867	0.78682	0.832195	0.358863	0.000505393	0.0047278	Down
S790	SL9A1_MOUSE	20544	Slc9a1	0.882143	0.926077	0.992496	0.577242	0.636442	0.652381	0.666281	0.00138209	0.00834977	Down
S167	LAP2B_MOUSE	21917	Tmpo	2.86431	2.66821	2.83036	1.72274	1.82634	1.72416	0.630553	0.000121102	0.00234924	Down
S179	LAP2B_MOUSE	21917	Tmpo	0.753096	0.811975	0.88881	0.463978	0.492334	0.461906	0.577949	0.0010392	0.00701374	Down
S183	LAP2B_MOUSE	21917	Tmpo	0.753096	0.811975	0.88881	0.463978	0.492334	0.461906	0.577949	0.0010392	0.00701374	Down
S470	MEF2A_MOUSE	17258	Mef2a	0.67817	0.655509	0.708486	0.254682	0.38274	0.286599	0.452471	0.000845383	0.00623982	Down
S485	MEF2A_MOUSE	17258	Mef2a	4.93002	4.89264	5.00525	3.24466	3.21012	3.28768	0.657036	1.85311e-06	0.000352965	Down
T36	4EBP1_MOUSE	13685	Eif4ebp1	7.42307	8.05302	6.01023	4.14856	4.53463	4.87917	0.631209	0.014511	0.0387317	Down
T45	4EBP1_MOUSE	13685	Eif4ebp1	10.4506	10.6828	9.18142	5.55214	6.57277	6.50233	0.614459	0.00241255	0.0115643	Down
S64	4EBP1_MOUSE	13685	Eif4ebp1	6.5976	7.78023	7.98658	4.33554	4.1578	3.93691	0.555805	0.00178377	0.00967666	Down
S210	LCP2_MOUSE	16822	Lcp2	16.7765	14.6559	15.1034	8.83194	10.7228	10.7434	0.651071	0.00392037	0.015515	Down
S346	IKBB_MOUSE	18036	Nfkbib	0.42426	0.433283	0.401321	0.297212	0.293033	0.244066	0.662748	0.00192703	0.0100945	Down
S49	SAMH1_MOUSE	56045	Samhd1	1.10156	1.18504	1.11671	0.731618	0.751221	0.758514	0.65858	0.00013525	0.00250613	Down
T56	SAMH1_MOUSE	56045	Samhd1	1.29421	1.16881	1.07431	0.594118	0.513856	0.388051	0.422926	0.00147299	0.00863274	Down
S759	NFAC2_MOUSE	18019	Nfatc2	0.834213	0.591461	0.797227	0.395273	0.370045	0.446345	0.545082	0.0128584	0.0353386	Down
S365	NFAC2_MOUSE	18019	Nfatc2	0.47337	0.43567	0.413864	0.289684	0.211112	0.261785	0.576445	0.0029245	0.0129795	Down
S345	ZDH20_MOUSE	75965	Zdhhc20	0.48488	0.457697	0.472207	0.233555	0.23593	0.177315	0.457172	0.0002458	0.00339579	Down
S510	SFR19_MOUSE	233208	Scaf1	0.705988	0.736254	0.794642	0.312938	0.464752	0.343162	0.501077	0.00219956	0.0109214	Down
S637	RABL6_MOUSE	227624	Rabl6	4.05907	4.2822	4.01873	2.17563	1.96329	2.05981	0.501515	3.64386e-05	0.00149616	Down
S638	RABL6_MOUSE	227624	Rabl6	4.05907	4.2822	4.01873	2.17563	1.96329	2.05981	0.501515	3.64386e-05	0.00149616	Down
S114	UTP18_MOUSE	217109	Utp18	7.4318	8.35844	9.32772	5.58138	5.45617	5.571	0.661222	0.00665969	0.0223741	Down
S115	UTP18_MOUSE	217109	Utp18	7.4318	8.35844	9.32772	5.58138	5.45617	5.571	0.661222	0.00665969	0.0223741	Down
S118	UTP18_MOUSE	217109	Utp18	6.01472	7.0249	7.90677	4.25539	4.21062	4.17489	0.603488	0.00717904	0.0234928	Down
S1515	ZZEF1_MOUSE	195018	Zzef1	2.47707	2.57551	2.28158	1.53788	1.52728	1.46075	0.6171	0.000476068	0.00461073	Down
T1519	ZZEF1_MOUSE	195018	Zzef1	0.47889	0.415618	0.541283	0.300631	0.278189	0.309703	0.618839	0.00822589	0.0259214	Down
S1538	ZZEF1_MOUSE	195018	Zzef1	5.53318	5.25585	5.80406	3.02184	2.81786	2.47023	0.500807	0.000256719	0.00343581	Down
S768	PHF12_MOUSE	268448	Phf12	1.19185	0.87525	1.01474	0.539215	0.572095	0.776855	0.612675	0.0279766	0.0629587	Down
S955	LRRK2_MOUSE	66725	Lrrk2	0.319313	0.369233	0.352358	0.2294	0.222301	0.206886	0.632707	0.00137721	0.00833496	Down
S591	MDC1_MOUSE	240087	Mdc1	1.37832	1.15467	1.14417	0.834026	0.703991	0.730221	0.616846	0.00548175	0.0195885	Down
S595	MDC1_MOUSE	240087	Mdc1	1.37832	1.15467	1.14417	0.834026	0.703991	0.730221	0.616846	0.00548175	0.0195885	Down
T1480	MDC1_MOUSE	240087	Mdc1	4.71851	4.47653	4.65077	2.60411	2.57129	2.51321	0.555302	1.16641e-05	0.000850742	Down
S461	MDC1_MOUSE	240087	Mdc1	2.36984	3.08235	2.67151	1.12602	1.64399	1.10831	0.477408	0.00642884	0.0218447	Down
S1443	MDC1_MOUSE	240087	Mdc1	0.52573	0.551268	0.552085	0.304372	0.210562	0.276219	0.485643	0.000659258	0.0054169	Down
S119	TTF2_MOUSE	74044	Ttf2	2.09404	2.25839	2.3917	1.37583	1.40751	1.60625	0.650876	0.00220491	0.0109321	Down
S354	RNC_MOUSE	14000	Drosha	1.03391	1.12479	1.42817	0.755152	0.475285	0.633336	0.519611	0.0163298	0.0420005	Down
T224	TAF3_MOUSE	209361	Taf3	0.713045	0.719282	0.713043	0.484135	0.4896	0.419424	0.649379	0.000377522	0.00405112	Down
S609	ZFY26_MOUSE	211978	Zfyve26	0.232751	0.263894	0.279087	0.138998	0.123606	0.142214	0.521853	0.00112174	0.00737465	Down
T292	JIP4_MOUSE	70834	Spag9	0.261125	0.156871	0.285105	0.0955997	0.0891496	0.081684	0.37894	0.0212266	0.0511782	Down
T217	JIP4_MOUSE	70834	Spag9	0.877714	0.875943	0.875176	0.356786	0.343157	0.352484	0.40034	2.20548e-08	0.000101	Down
S344	CCNL1_MOUSE	56706	Ccnl1	1.3547	1.32181	1.32996	0.866778	0.87272	0.868461	0.650936	1.29004e-06	0.000325799	Down
S285	PHAR4_MOUSE	100169	Phactr4	0.777928	0.855291	0.760863	0.355073	0.39228	0.428352	0.491088	0.000349466	0.003896	Down
T1368	PDS5B_MOUSE	100710	Pds5b	0.76519	0.792477	0.889277	0.435444	0.452135	0.49199	0.563793	0.000990185	0.00685748	Down
S1578	HERC2_MOUSE	15204	Herc2	0.744057	0.764129	0.983935	0.541013	0.516453	0.535251	0.639101	0.0177817	0.0448765	Down
S785	ABL2_MOUSE	11352	Abl2	0.519689	0.442407	0.597671	0.239578	0.267643	0.201305	0.454252	0.0043453	0.0166457	Down
S2547	Q4FE56_MOUSE	22284	Usp9x	0.361879	0.445959	0.505439	0.270258	0.250459	0.255175	0.590806	0.0130765	0.035809	Down
S532	Q3ZB59_MOUSE	14389	Gab2	0.206999	0.332184	0.228026	0.0773123	0.0665738	0.107952	0.328253	0.0134008	0.0365511	Down
S481	Q3V117_MOUSE	104112	Acly	7.48444	7.06243	7.73319	4.87313	4.68004	4.88801	0.648166	0.00022638	0.00326111	Down
S246	CPZIP_MOUSE	226594	Rcsd1	0.817767	0.655084	0.581233	0.334879	0.257515	0.501663	0.532625	0.0332546	0.0715939	Down
S370	Q3UXQ3_MOUSE	21406	Tcf12	1.32691	1.06212	1.27601	0.692597	0.750225	0.636881	0.567443	0.00378586	0.0152524	Down
S216	Q3UXQ3_MOUSE	21406	Tcf12	2.0667	2.23015	2.24418	1.34375	1.22666	1.30966	0.59319	0.00018526	0.00295424	Down
S113	Q3UXQ3_MOUSE	21406	Tcf12	1.29486	1.06936	1.27192	0.430027	0.249569	0.284228	0.265067	0.000597592	0.00521999	Down
T51	Q3US59_MOUSE	115482679	Gm28047	0.801238	0.840321	0.899924	0.384977	0.42838	0.454839	0.498999	0.000270838	0.00353067	Down
T53	Q3US59_MOUSE	115482679	Gm28047	2.03212	2.05258	2.29271	1.35817	1.32814	1.49023	0.654896	0.00166094	0.00928203	Down
S97	Q3US59_MOUSE	115482679	Gm28047	0.203102	0.265887	0.220062	0.106421	0.127489	0.130401	0.528716	0.00586864	0.0204418	Down
T101	Q3US59_MOUSE	115482679	Gm28047	1.65013	1.62666	1.50378	1.04185	0.981971	0.998137	0.632135	0.000274778	0.00354831	Down
S387	FCHO2_MOUSE	218503	Fcho2	1.10499	1.21607	1.17477	0.50773	0.518646	0.540113	0.448103	4.48662e-05	0.0016192	Down
S373	Q3UPT4_MOUSE	26411	Map4k1	0.439359	0.438267	0.437706	0.276495	0.262657	0.25192	0.601423	1.64398e-05	0.000997593	Down
S321	Q3UPT4_MOUSE	26411	Map4k1	1.24702	1.23692	1.1617	0.78947	0.772406	0.796564	0.646921	0.000103622	0.00221132	Down
S640	HDGR2_MOUSE	15193	Hdgfl2	0.730847	1.04087	0.770077	0.613721	0.457531	0.468648	0.605833	0.0382207	0.079202	Down
S647	PP12C_MOUSE	232807	Ppp1r12c	2.07817	2.04111	2.01589	1.52545	1.00737	1.49678	0.656803	0.0142505	0.0382483	Down
S515	SMCR8_MOUSE	237782	Smcr8	0.295305	0.242897	0.276514	0.164543	0.141671	0.126286	0.53086	0.00254114	0.0118672	Down
S290	Q3UJB0_MOUSE	319322	Sf3b2	0.730372	0.994042	0.898827	0.304957	0.245082	0.349386	0.342868	0.00226429	0.0111158	Down
S286	Q3UID0_MOUSE	68094	Smarcc2	1.20197	1.39561	1.41156	0.561965	0.208608	0.344084	0.278029	0.00142707	0.00846839	Down
S1063	NOL8_MOUSE	70930	Nol8	0.516872	0.480341	0.559953	0.265657	0.0869353	0.207228	0.359512	0.00442396	0.0168435	Down
S1064	NOL8_MOUSE	70930	Nol8	0.516872	0.480341	0.559953	0.265657	0.0869353	0.207228	0.359512	0.00442396	0.0168435	Down
S1065	NOL8_MOUSE	70930	Nol8	0.516872	0.480341	0.559953	0.265657	0.0869353	0.207228	0.359512	0.00442396	0.0168435	Down
S783	NOL8_MOUSE	70930	Nol8	0.719723	0.776883	0.617538	0.165717	0.415258	0.445271	0.485419	0.0223159	0.0530582	Down
S787	NOL8_MOUSE	70930	Nol8	0.719723	0.776883	0.617538	0.165717	0.415258	0.445271	0.485419	0.0223159	0.0530582	Down
T518	Q3UHU8_MOUSE	14886	Gtf2i	0.55634	0.474177	0.514025	0.279113	0.247681	0.272512	0.517504	0.000629376	0.00531481	Down
T287	Q3UHU8_MOUSE	14886	Gtf2i	0.240783	0.242975	0.275635	0.123694	0.118101	0.11499	0.469828	0.000313942	0.00373514	Down
S103	Q3UHU8_MOUSE	14886	Gtf2i	0.298709	0.252036	0.235016	0.151192	0.146831	0.138976	0.556147	0.00387958	0.0154485	Down
S313	NOM1_MOUSE	433864	Nom1	0.526877	0.608466	0.861534	0.347226	0.39486	0.359775	0.551792	0.0427247	0.0862163	Down
S314	NOM1_MOUSE	433864	Nom1	0.526877	0.608466	0.861534	0.347226	0.39486	0.359775	0.551792	0.0427247	0.0862163	Down
S315	NOM1_MOUSE	433864	Nom1	0.526877	0.608466	0.861534	0.347226	0.39486	0.359775	0.551792	0.0427247	0.0862163	Down
S203	PCLI1_MOUSE	98496	Pid1	1.27081	1.44488	1.90199	0.800612	0.978491	1.05005	0.612679	0.0420921	0.0852911	Down
S951	ESYT1_MOUSE	23943	Esyt1	1.02648	1.08659	1.06667	0.464239	0.560899	0.48754	0.475724	8.2683e-05	0.00201764	Down
S79	Q3U717_MOUSE	69660	Tmbim1	0.424826	0.522673	0.517477	0.311701	0.264201	0.318982	0.610853	0.00625538	0.0213931	Down
S57	Q3U432_MOUSE	14457	Gas7	13.3012	13.2591	14.0638	8.12358	7.89831	8.13136	0.594555	3.57908e-05	0.00149616	Down
S641	WDR70_MOUSE	545085	Wdr70	2.77266	2.41495	2.88927	1.68054	1.7779	1.69509	0.63806	0.00261157	0.0120499	Down
S70	ALKB5_MOUSE	268420	Alkbh5	7.88397	7.94321	8.52707	5.37936	5.60997	4.28149	0.627029	0.0027214	0.0123173	Down
S362	ALKB5_MOUSE	268420	Alkbh5	2.1376	2.13551	2.15247	1.43398	1.28669	1.19841	0.60992	0.00026557	0.00350195	Down
S439	RMP_MOUSE	19777	Uri1	6.9207	7.02577	6.73173	4.51893	4.75057	4.03706	0.643507	0.000413764	0.00423459	Down
S501	RIC8A_MOUSE	101489	Ric8a	0.644876	0.729156	0.636299	0.469781	0.371151	0.415751	0.625113	0.00363357	0.0148483	Down
S129	Q3TFP0_MOUSE	14105	Srsf10	1.08996	1.32943	1.28617	0.322658	0.315861	0.142882	0.210872	0.000493974	0.00467209	Down
S131	Q3TFP0_MOUSE	14105	Srsf10	12.5987	13.335	14.5316	7.14484	6.92773	6.67144	0.512637	0.00034455	0.00386674	Down
S133	Q3TFP0_MOUSE	14105	Srsf10	13.6126	14.151	15.3084	8.33901	8.06063	7.82028	0.562312	0.000273494	0.00354508	Down
S130	GPTC4_MOUSE	66614	Gpatch4	1.1741	2.06395	1.87254	0.912496	0.706812	0.863537	0.485824	0.0342803	0.0732278	Down
T120	EAF6_MOUSE	70088	Meaf6	1.60935	1.93666	2.02624	1.05866	1.00085	1.09345	0.565835	0.00339106	0.0141474	Down
S125	EAF6_MOUSE	70088	Meaf6	1.60935	1.93666	2.02624	1.05866	1.00085	1.09345	0.565835	0.00339106	0.0141474	Down
T85	MCM10_MOUSE	70024	Mcm10	0.731368	0.723293	0.599729	0.325538	0.372935	0.41495	0.541972	0.00325144	0.0138393	Down
S173	PEBB_MOUSE	12400	Cbfb	2.93614	3.02863	3.13971	2.07173	2.04104	1.84264	0.654119	0.00034863	0.00389341	Down
S183	IF2P_MOUSE	226982	Eif5b	0.695282	1.02332	1.07036	0.397132	0.405445	0.365682	0.418887	0.0103744	0.0302327	Down
S184	IF2P_MOUSE	226982	Eif5b	0.695282	1.02332	1.07036	0.397132	0.405445	0.365682	0.418887	0.0103744	0.0302327	Down
S187	IF2P_MOUSE	226982	Eif5b	0.695282	1.02332	1.07036	0.397132	0.405445	0.365682	0.418887	0.0103744	0.0302327	Down
S1164	IF2P_MOUSE	226982	Eif5b	0.640325	0.608131	0.638318	0.399766	0.418067	0.424773	0.658587	7.43926e-05	0.00196089	Down
S66	CDK18_MOUSE	18557	Cdk18	0.919136	0.866013	0.86813	0.498832	0.555231	0.605881	0.62562	0.000732379	0.00575249	Down
S469	MARK3_MOUSE	17169	Mark3	0.943581	0.760403	0.797331	0.404483	0.351484	0.372767	0.451256	0.00139749	0.00839781	Down
S113	S30BP_MOUSE	57230	Sap30bp	0.258605	0.3281	0.352104	0.149688	0.171869	0.185297	0.539892	0.0085468	0.0265832	Down
T1245	TOP2A_MOUSE	21973	Top2a	0.546042	0.631159	0.650876	0.346698	0.333184	0.157458	0.458044	0.00870032	0.0268126	Down
S4	TOP2A_MOUSE	21973	Top2a	1.00835	0.859834	0.812525	0.570834	0.132597	0.495434	0.44722	0.0286482	0.0641334	Down
S874	RBBP6_MOUSE	19647	Rbbp6	0.641832	0.643933	0.498697	0.345387	0.37056	0.37678	0.612357	0.00927881	0.0280409	Down
S517	RBBP6_MOUSE	19647	Rbbp6	0.653305	0.713318	0.627578	0.415983	0.404034	0.460617	0.642179	0.00149293	0.00871237	Down
T54	JUPI1_MOUSE	15374	Jpt1	0.866451	0.919214	1.42149	0.529487	0.491288	0.424165	0.450537	0.0307362	0.0674642	Down
S131	JUPI1_MOUSE	15374	Jpt1	1.68477	1.65593	1.56919	0.950045	0.837708	0.91091	0.549638	0.000103685	0.00221132	Down
S28	SMN_MOUSE	20595	Smn1	5.03917	4.87351	5.43163	3.45449	3.20364	3.06129	0.633422	0.000742102	0.0058089	Down
S20	RGS14_MOUSE	51791	Rgs14	0.764574	0.754086	0.805177	0.391285	0.432022	0.269791	0.470385	0.00131183	0.00802452	Down
T14	CDK2_MOUSE	12566	Cdk2	4.38974	4.57816	4.26067	2.82348	2.82891	2.86484	0.643852	7.23802e-05	0.00195421	Down
Y15	CDK2_MOUSE	12566	Cdk2	4.38974	4.57816	4.26067	2.82348	2.82891	2.86484	0.643852	7.23802e-05	0.00195421	Down
S237	RS3A_MOUSE	20091	Rps3a	0.210717	0.230965	0.243193	0.122549	0.125852	0.150001	0.581714	0.0017392	0.0095101	Down
S7	KI20A_MOUSE	19348	Kif20a	0.202892	0.248424	0.291994	0.161188	0.16704	0.155266	0.65046	0.0288959	0.064421	Down
S14	KI20A_MOUSE	19348	Kif20a	0.202892	0.248424	0.291994	0.161188	0.16704	0.155266	0.65046	0.0288959	0.064421	Down
S21	KI20A_MOUSE	19348	Kif20a	0.202892	0.248424	0.291994	0.161188	0.16704	0.155266	0.65046	0.0288959	0.064421	Down
S192	CSRP1_MOUSE	13007	Csrp1	0.580448	0.569615	0.613326	0.35633	0.344622	0.333373	0.586556	7.87995e-05	0.00198696	Down
S218	GABP2_MOUSE	213054	Gabpb2	1.73527	1.61983	1.5596	1.00284	0.975374	0.956077	0.597044	0.000244212	0.00338295	Down
S285	VASP_MOUSE	22323	Vasp	1.31066	1.95445	1.65325	0.786254	0.524201	1.0967	0.489423	0.0282338	0.0633583	Down
T529	ERF_MOUSE	13875	Erf	0.733655	0.893959	0.777785	0.449908	0.510766	0.418376	0.573314	0.00339192	0.0141474	Down
T37	4EBP2_MOUSE	13688	Eif4ebp2	0.791848	0.779774	1.01678	0.369299	0.558587	0.439454	0.528256	0.0127233	0.0350941	Down
T46	4EBP2_MOUSE	13688	Eif4ebp2	0.990663	1.18144	1.24891	0.369299	0.558587	0.439454	0.399689	0.00196916	0.0101898	Down
S297	NHRF1_MOUSE	26941	Slc9a3r1	2.15613	1.78707	1.4311	1.13489	1.03111	1.07494	0.603044	0.0282292	0.0633583	Down
Y293	WASP_MOUSE	22376	Was	0.256397	0.220083	0.205425	0.101402	0.112991	0.172941	0.568017	0.0216402	0.0518609	Down
S575	STIM1_MOUSE	20866	Stim1	1.16173	0.965689	0.903582	0.475066	0.442585	0.415209	0.439743	0.00207527	0.0105019	Down
S536	PKN1_MOUSE	320795	Pkn1	0.712617	0.381914	0.796758	0.298306	0.182585	0.183553	0.351318	0.0365436	0.0767471	Down
S2669	ITPR3_MOUSE	16440	Itpr3	0.761642	0.944706	0.917522	0.43857	0.422386	0.405381	0.482622	0.00144028	0.00852115	Down
S1832	ITPR3_MOUSE	16440	Itpr3	2.36437	2.36765	2.44111	0.648062	0.760967	0.75949	0.302311	3.16377e-06	0.000454462	Down
S339	KAPCB_MOUSE	18749	Prkacb	0.0791757	0.116084	0.0871033	0.0684934	0.0543753	0.0574948	0.638765	0.0472627	0.0934219	Down
S146	RS10_MOUSE	67097	Rps10	3.90171	4.02322	3.73198	2.35803	2.20642	2.3476	0.592958	8.48015e-05	0.00203214	Down
Y185	MK01_MOUSE	26413	Mapk1	3.88241	3.74524	3.41907	1.40789	1.29502	1.28031	0.360579	8.01154e-05	0.00200493	Down
S563	HPS5_MOUSE	246694	Hps5	0.514925	0.597801	0.604827	0.338488	0.343071	0.372419	0.613652	0.00198208	0.0102189	Down
S192	SLX9_MOUSE	108707	Slx9	0.281669	0.334558	0.266799	0.215729	0.18492	0.17525	0.652188	0.0128313	0.0352925	Down
S502	EF2_MOUSE	13629	Eef2	0.875898	0.796099	0.814478	0.397187	0.425833	0.441327	0.50849	0.000118713	0.00233242	Down
T1847	KMT2A_MOUSE	214162	Kmt2a	0.38921	0.400301	0.386222	0.246885	0.255425	0.237053	0.628853	2.85814e-05	0.00131532	Down
S253	RD23B_MOUSE	19359	Rad23b	2.55354	2.39438	2.3412	1.22675	1.11898	1.22311	0.489612	7.01262e-05	0.00195421	Down
S270	M3K1_MOUSE	26401	Map3k1	1.59544	1.69398	1.76294	0.886536	1.05469	0.866659	0.555757	0.000626205	0.00529456	Down
T200	HDGF_MOUSE	15191	Hdgf	3.94279	3.91941	4.69494	2.49303	2.28034	2.32864	0.565575	0.00228658	0.0111549	Down
S202	HDGF_MOUSE	15191	Hdgf	1.37157	1.54338	1.88549	1.17178	0.961124	0.959108	0.644109	0.0268819	0.0609756	Down
S349	XPC_MOUSE	22591	Xpc	2.54524	2.09317	2.08827	1.21553	1.40981	0.563741	0.474094	0.0166002	0.0426002	Down
S699	CENPC_MOUSE	12617	Cenpc	5.49504	5.27166	5.53132	3.46379	3.55665	3.61814	0.652753	3.45101e-05	0.00147897	Down
S612	CENPC_MOUSE	12617	Cenpc	1.25871	1.37063	1.10308	0.748789	0.693726	0.679693	0.568588	0.00261597	0.0120499	Down
S302	CENPC_MOUSE	12617	Cenpc	2.77714	2.55977	3.05933	1.14589	1.11471	1.22023	0.41457	0.00037823	0.00405238	Down
S570	LMNA_MOUSE	16905	Lmna	6.51508	6.68288	5.77593	3.42984	2.47308	3.66024	0.504017	0.00237737	0.0114478	Down
S35	ANXA5_MOUSE	11747	Anxa5	1.64045	1.69628	1.61788	0.840932	0.947216	0.73287	0.508823	0.000253482	0.00343503	Down
S123	H11_MOUSE	80838	H1-1	1.01315	0.870069	0.881443	0.600257	0.513037	0.425725	0.556676	0.00389819	0.0154697	Down
S427	FOXK1_MOUSE	17425	Foxk1	2.12986	1.86524	2.25375	1.33661	1.28783	1.47798	0.656509	0.00502345	0.0184104	Down
S1684	CHD1_MOUSE	12648	Chd1	1.02925	1.24442	1.26794	0.585152	0.636731	0.550851	0.500545	0.00180101	0.00973935	Down
S1678	CHD1_MOUSE	12648	Chd1	0.641881	0.937986	0.78024	0.46794	0.487225	0.550851	0.638113	0.0330858	0.0713425	Down
S34	CAP1_MOUSE	12331	Cap1	34.543	33.6282	34.6898	18.5007	19.7325	21.0707	0.576544	5.77826e-05	0.00180098	Down
T48	GNL1_MOUSE	14670	Gnl1	6.3856	7.57118	8.27232	2.74778	2.49564	3.04673	0.372941	0.00125907	0.00787078	Down
T50	GNL1_MOUSE	14670	Gnl1	1.87725	2.39364	2.58627	0.442082	0.0994916	0.493915	0.151008	0.00137905	0.00833872	Down
S38	RL12_MOUSE	269261	Rpl12	2.08744	2.06152	2.03327	1.01116	1.31205	1.00091	0.537691	0.000766422	0.00589827	Down
S716	FAK1_MOUSE	14083	Ptk2	0.330151	0.363193	0.300929	0.257393	0.141016	0.212431	0.614359	0.0290564	0.0646464	Down
S29	FAK1_MOUSE	14083	Ptk2	1.40681	1.15751	1.21491	0.821824	0.689152	0.752277	0.598865	0.00393952	0.0155786	Down
S802	KIF4_MOUSE	16571	Kif4	3.54648	3.61544	4.1667	2.66988	1.68948	2.49778	0.605294	0.0144223	0.0386003	Down
S320	CTND1_MOUSE	12388	Ctnnd1	0.143551	0.147376	0.21791	0.0739035	0.0862131	0.0787905	0.469515	0.0211684	0.0510917	Down
S565	NKTR_MOUSE	18087	Nktr	3.37655	3.22059	3.29739	1.96685	1.86599	1.59241	0.548308	0.000246625	0.00339579	Down
T658	MAP4_MOUSE	17758	Map4	2.33654	2.3433	2.15334	1.15915	1.03243	1.29045	0.509576	0.000325406	0.00377071	Down
S667	MAP4_MOUSE	17758	Map4	7.58165	7.90544	9.42978	5.30357	5.58832	5.51543	0.658482	0.00791165	0.0251624	Down
S1046	MAP4_MOUSE	17758	Map4	2.76016	2.85361	2.88606	1.43649	1.39892	1.44412	0.503484	3.99637e-06	0.000502292	Down
S732	MCM3_MOUSE	17215	Mcm3	1.08193	1.06435	1.12847	0.84414	0.535641	0.737278	0.646481	0.0139833	0.0377495	Down
S160	MCM3_MOUSE	17215	Mcm3	2.81451	2.62246	1.73222	0.88036	0.846034	1.13592	0.399252	0.0142293	0.0382329	Down
S37	TYB4_MOUSE	19241	Tmsb4x	0.892629	0.835473	0.900012	0.334039	0.344282	0.312706	0.377087	1.68904e-05	0.00101594	Down
T166	LSP1_MOUSE	16985	Lsp1	1.89425	2.04943	1.97759	1.03395	0.980176	0.965606	0.503225	3.8075e-05	0.00150913	Down
S168	LSP1_MOUSE	16985	Lsp1	2.74779	2.81172	2.44719	1.45813	1.32936	0.965606	0.468745	0.00157116	0.00901117	Down
S394	LMNB1_MOUSE	16906	Lmnb1	9.37504	9.02297	8.63853	4.66278	4.62926	4.17441	0.498083	6.87277e-05	0.00195421	Down
S150	DNMT1_MOUSE	13433	Dnmt1	1.11365	1.35135	1.46989	0.652465	0.716059	0.771153	0.54377	0.00558052	0.0197857	Down
S138	DNMT1_MOUSE	13433	Dnmt1	1.11365	1.35135	1.46989	0.652465	0.716059	0.771153	0.54377	0.00558052	0.0197857	Down
S601	RB_MOUSE	19645	Rb1	0.503907	0.368952	0.362673	0.246623	0.104952	0.253099	0.489404	0.0345408	0.0736004	Down
S605	RB_MOUSE	19645	Rb1	0.503907	0.368952	0.362673	0.246623	0.104952	0.253099	0.489404	0.0345408	0.0736004	Down
T816	RB_MOUSE	19645	Rb1	0.149079	0.190428	0.207291	0.124974	0.0967691	0.105182	0.597891	0.0188468	0.0469937	Down
T367	RB_MOUSE	19645	Rb1	2.93633	2.54434	2.78924	1.35434	1.33507	1.43554	0.49879	0.000308274	0.00370848	Down
S344	RB_MOUSE	19645	Rb1	0.530407	0.640154	0.571287	0.427557	0.302361	0.281983	0.580936	0.0119453	0.0334731	Down
S31	RB_MOUSE	19645	Rb1	2.11431	1.72349	2.14135	1.23483	1.34517	1.37375	0.661257	0.00883068	0.027129	Down
S243	RB_MOUSE	19645	Rb1	0.175591	0.160663	0.182453	0.105842	0.120469	0.111689	0.651621	0.00144849	0.00856231	Down
S20	RIR2_MOUSE	20135	Rrm2	8.68814	8.75886	8.68248	4.97559	4.7626	4.95036	0.562144	7.41236e-07	0.000268365	Down
S711	CSF1R_MOUSE	12978	Csf1r	1.3949	1.36756	1.18294	0.906645	0.829589	0.654098	0.605852	0.00660779	0.0222433	Down
T307	NUCL_MOUSE	17975	Ncl	0.307648	0.282401	0.265458	0.242858	0.141848	0.178596	0.658443	0.0381219	0.079045	Down
S306	ENPL_MOUSE	22027	Hsp90b1	6.20035	5.47462	6.09607	1.15576	0.978972	3.14594	0.29715	0.00468885	0.0175403	Down
T19	ANXA2_MOUSE	12306	Anxa2	2.04055	2.31753	1.79866	0.287925	0.236783	0.368212	0.145031	0.000344537	0.00386674	Down
S138	SAP30_MOUSE	60406	Sap30	3.49713	3.27488	3.39081	2.27414	1.70248	1.46074	0.535024	0.00322211	0.0137315	Down
S86	E41L2_MOUSE	13822	Epb41l2	2.07641	1.93376	1.87531	0.835679	0.853373	0.777994	0.419175	5.81627e-05	0.00180462	Down
T231	PJA1_MOUSE	18744	Pja1	1.47485	1.47616	1.52512	0.391174	0.414751	0.396003	0.268519	4.46878e-07	0.000232482	Down
S13	STK10_MOUSE	20868	Stk10	0.422639	0.509676	0.38093	0.186193	0.243101	0.177211	0.461836	0.00548265	0.0195885	Down
S85	BNIP3_MOUSE	12176	Bnip3	1.54498	2.10056	2.4192	1.1597	1.04146	1.11162	0.546236	0.0236026	0.0553308	Down
S796	SEM6B_MOUSE	20359	Sema6b	0.46355	0.453138	0.375639	0.161751	0.246274	0.315592	0.559933	0.0224277	0.0532687	Down
S391	SUV91_MOUSE	20937	Suv39h1	0.740539	0.758914	0.726179	0.470331	0.460353	0.487169	0.637056	2.56621e-05	0.00125074	Down
T163	BYST_MOUSE	53414	Bysl	0.713439	0.669485	0.662476	0.350265	0.300774	0.343076	0.486024	9.40583e-05	0.00212235	Down
S139	NUDC_MOUSE	18221	Nudc	8.18349	8.50347	9.41899	5.55167	4.62362	5.46946	0.599279	0.00182395	0.00980424	Down
S50	BET1_MOUSE	12068	Bet1	2.2553	2.12507	2.22602	1.44946	1.3441	1.27436	0.615755	0.000193694	0.00302542	Down
S925	FOG1_MOUSE	22761	Zfpm1	0.637638	0.555895	0.567669	0.375315	0.284148	0.429766	0.618458	0.0106557	0.0308721	Down
S927	FOG1_MOUSE	22761	Zfpm1	0.637638	0.555895	0.567669	0.375315	0.284148	0.429766	0.618458	0.0106557	0.0308721	Down
T94	RNF5_MOUSE	54197	Rnf5	2.97965	3.45342	3.19015	1.37783	1.58777	1.80251	0.49548	0.000919406	0.0065739	Down
S60	IMA3_MOUSE	16649	Kpna4	0.221677	0.236668	0.244088	0.196265	0.136996	0.134372	0.665733	0.0211633	0.0510917	Down
T25	NEP1_MOUSE	14791	Emg1	2.19966	2.25111	2.25557	1.12657	1.32725	1.11016	0.531433	0.000130247	0.00243621	Down
S77	ATN1_MOUSE	13498	Atn1	0.747923	0.725213	0.87144	0.314129	0.19002	0.311512	0.347893	0.00113324	0.007408	Down
T39	MP2K3_MOUSE	26397	Map2k3	0.294885	0.256695	0.271629	0.0839152	0.138947	0.156671	0.461041	0.00383216	0.0153219	Down
S103	AKAP1_MOUSE	11640	Akap1	1.75523	1.95091	1.98022	1.14863	1.25084	1.31774	0.653707	0.00158634	0.00905706	Down
S12	GTPB1_MOUSE	14904	Gtpbp1	0.557883	0.510845	0.537062	0.195996	0.185662	0.177466	0.348192	1.8317e-05	0.00105546	Down
S580	GTPB1_MOUSE	14904	Gtpbp1	2.17058	1.91778	1.95186	1.16213	0.87501	1.1383	0.525716	0.00141123	0.00844623	Down
T597	KMT2B_MOUSE	75410	Kmt2b	0.13692	0.148327	0.128542	0.0848795	0.0900234	0.0989155	0.661735	0.0027012	0.012259	Down
S244	K4DI59_MOUSE	16882	Lig3	0.957316	1.02876	1.03535	0.321319	0.791763	0.534109	0.545171	0.0295848	0.0655666	Down
S1354	K3W4P2_MOUSE	68510	Ints1	1.09244	0.930116	1.09894	0.679935	0.698827	0.58817	0.630125	0.00406289	0.0158561	Down
T31	K3W4M7_MOUSE	216877	Dhx33	1.56412	1.56722	1.65676	0.807937	0.800132	0.670887	0.475963	0.000100178	0.00218065	Down
T189	J3QNW0_MOUSE	13433	Dnmt1	5.25116	5.08101	5.893	3.67088	3.52188	3.26159	0.644329	0.00218744	0.0108965	Down
T862	J3QNK5_MOUSE	269003	Sap130	0.832588	0.652953	0.764443	0.38089	0.307296	0.437024	0.500096	0.00434404	0.0166457	Down
S676	J3QK52_MOUSE	57741	Noc2l	1.56475	1.96786	2.18364	0.712964	0.429775	0.366255	0.263983	0.00263026	0.0120883	Down
S677	J3QK52_MOUSE	57741	Noc2l	1.23395	1.71423	1.92158	0.390041	0.0395605	0.0265642	0.093673	0.0033677	0.0140964	Down
T1731	H9KV15_MOUSE	20658	Son	0.389489	0.455637	0.517099	0.304403	0.269804	0.31276	0.651116	0.0154835	0.0404921	Down
S317	H9KV15_MOUSE	20658	Son	8.15393	7.42006	7.07379	4.14578	3.877	3.99768	0.530757	0.000415803	0.00424301	Down
S456	H7BX08_MOUSE	67886	Camsap2	0.506649	0.496184	0.478049	0.27016	0.329888	0.314694	0.617701	0.000673219	0.00548007	Down
S24	H3BKM2_MOUSE	232679	Zc3hc1	1.86091	2.00363	1.87271	1.26894	1.15276	1.27002	0.643464	0.000342919	0.00386674	Down
S55	H3BKB7_MOUSE	18987	Pou2f2	0.640529	0.576377	0.71015	0.399736	0.367506	0.399969	0.605696	0.00321501	0.0137098	Down
S926	H3BJU7_MOUSE	16800	Arhgef2	38.6439	38.4816	38.5957	22.7077	21.8122	23.2864	0.585946	3.1813e-06	0.000454462	Down
S930	H3BJU7_MOUSE	16800	Arhgef2	20.529	20.8935	20.6886	13.0372	13.2286	13.5564	0.641145	2.28123e-06	0.000401087	Down
S124	H3BJU7_MOUSE	16800	Arhgef2	2.15074	2.11196	2.20335	1.36178	1.15849	1.1367	0.565565	0.000254609	0.00343581	Down
S132	ARFP1_MOUSE	99889	Arfip1	1.11343	0.995941	1.06211	0.469702	0.49618	0.495836	0.460895	8.43511e-05	0.00203214	Down
S617	G5E8R4_MOUSE	52036	Ppp6r3	6.72394	7.06722	7.48281	4.4859	4.63902	4.50855	0.640852	0.000344376	0.00386674	Down
S2202	G5E8Q0_MOUSE	17101	Lyst	0.238567	0.235751	0.191262	0.148806	0.100382	0.13478	0.576891	0.0111028	0.0318186	Down
S153	G5E8L8_MOUSE	26405	Map3k2	0.585909	0.591947	0.531321	0.252436	0.286236	0.27196	0.474282	0.000157595	0.00266822	Down
S837	G5E8I8_MOUSE	27967	Cherp	0.489886	0.559298	0.544322	0.221766	0.274878	0.186343	0.428607	0.000800745	0.00603375	Down
S839	G5E8I8_MOUSE	27967	Cherp	0.489886	0.559298	0.544322	0.221766	0.274878	0.186343	0.428607	0.000800745	0.00603375	Down
T841	G5E8I8_MOUSE	27967	Cherp	0.489886	0.559298	0.544322	0.221766	0.274878	0.186343	0.428607	0.000800745	0.00603375	Down
S1024	TRIPC_MOUSE	14897	Trip12	0.192419	0.209473	0.180327	0.11245	0.118356	0.130776	0.621041	0.00184246	0.0098348	Down
T273	G5E866_MOUSE	81898	Sf3b1	4.07098	4.59395	4.85151	2.52263	1.68657	3.75666	0.589346	0.0452532	0.0903734	Down
S129	G5E866_MOUSE	81898	Sf3b1	2.17354	2.14124	2.41625	1.47742	1.3351	1.39308	0.624807	0.000937102	0.00666762	Down
S98	G3X9Z0_MOUSE	68014	Zwilch	0.78911	0.686573	0.606154	0.329663	0.160156	0.230192	0.345854	0.00327878	0.0138723	Down
S1020	G3X9Q3_MOUSE	70719	Arhgap45	2.30143	2.84261	3.07624	1.59754	1.87524	1.761	0.636692	0.0149355	0.0394486	Down
S1022	G3X9Q3_MOUSE	70719	Arhgap45	2.30143	2.84261	3.07624	1.59754	1.87524	1.761	0.636692	0.0149355	0.0394486	Down
S1566	BIG1_MOUSE	211673	Arfgef1	0.652697	0.738803	0.801359	0.460332	0.363788	0.475717	0.592759	0.00584566	0.0204196	Down
S286	G3X963_MOUSE	70472	Atad2	0.95787	1	1.10225	0.541674	0.794932	0.48004	0.593651	0.0170954	0.0435936	Down
S412	G3X961_MOUSE	234825	Klhdc4	0.376124	0.389597	0.369244	0.179793	0.212781	0.252801	0.56863	0.0017439	0.00952065	Down
S71	G3X8T2_MOUSE	76014	Zc3h18	6.0488	7.31424	7.16472	4.1804	4.55228	4.76643	0.657603	0.00571707	0.0200933	Down
S75	G3X8T2_MOUSE	76014	Zc3h18	6.12979	7.34749	7.16472	4.05664	4.21182	4.24048	0.605995	0.00211083	0.0106348	Down
S552	G3X8T2_MOUSE	76014	Zc3h18	3.6637	3.72687	3.93765	2.15383	2.17906	2.08441	0.566487	4.8104e-05	0.00169153	Down
S30	G3UYR9_MOUSE	227331	Gigyf2	0.887638	1.053	0.947151	0.233403	0.318026	0.627823	0.408358	0.0116402	0.032806	Down
T46	G3UXY2_MOUSE	13435	Dnmt3a	0.466187	0.553316	0.638386	0.223134	0.300516	0.288874	0.490096	0.006977	0.0231229	Down
T1051	G3UX48_MOUSE	53761	Prrc2a	0.895058	0.964135	0.967971	0.537722	0.253729	0.648665	0.509385	0.0182383	0.0457928	Down
S1035	G3UX48_MOUSE	53761	Prrc2a	0.650006	0.811056	0.860666	0.352689	0.387321	0.379482	0.482181	0.00340422	0.0141815	Down
T1281	G3UX48_MOUSE	53761	Prrc2a	0.349836	0.451107	0.347621	0.248382	0.145044	0.194157	0.51158	0.0145609	0.0388195	Down
S144	F8WJ93_MOUSE	78798	Eml4	0.73539	0.654501	0.636967	0.181183	0.339205	0.290106	0.399877	0.00188861	0.00995402	Down
T3971	F8WI37_MOUSE	231051	Kmt2c	0.314703	0.329455	0.31619	0.189461	0.217063	0.229158	0.661929	0.00102455	0.0069489	Down
S4267	F8WI37_MOUSE	231051	Kmt2c	0.360255	0.293602	0.219773	0.152648	0.170294	0.14791	0.53896	0.0309771	0.0678625	Down
S457	F8WI18_MOUSE	18720	Pip5k1a	0.272907	0.280595	0.300062	0.172543	0.180541	0.206139	0.655163	0.00163225	0.00921649	Down
S797	F8WHJ1_MOUSE	74349	Fhip1b	0.153533	0.18062	0.184163	0.0544595	0.0904076	0.0365501	0.350013	0.00376196	0.0152301	Down
S1668	F8VQ87_MOUSE	24127	Xrn1	3.65038	3.3025	3.54781	1.80798	1.86908	1.85544	0.52687	9.38997e-05	0.00212235	Down
S1382	F8VQ87_MOUSE	24127	Xrn1	2.06371	1.75155	1.70895	1.21065	1.09953	1.32875	0.658724	0.00842409	0.0263546	Down
S512	FARP1_MOUSE	223254	Farp1	15.2592	14.2457	16.2295	11.3508	9.31605	9.47936	0.659156	0.00392117	0.015515	Down
S55	F8VPM7_MOUSE	111173	Erc1	0.316618	0.197048	0.287555	0.121882	0.0952857	0.181267	0.497284	0.0381577	0.0790954	Down
S64	F6XSD0_MOUSE	24086	Tlk2	0.252575	0.259827	0.304227	0.151987	0.117418	0.150957	0.514753	0.00259364	0.0119934	Down
S66	F6XSD0_MOUSE	24086	Tlk2	0.252575	0.259827	0.304227	0.151987	0.117418	0.150957	0.514753	0.00259364	0.0119934	Down
S88	F6THF3_MOUSE	216578	Papolg	0.509042	0.455327	0.480496	0.340912	0.299126	0.32126	0.66532	0.0012053	0.00763836	Down
S138	F6RND9_MOUSE	26936	Mprip	0.142184	0.128682	0.125709	0.0534103	0.0733721	0.0801704	0.52185	0.00264649	0.0121222	Down
T498	F6R6F1_MOUSE	19707	Reps1	0.944839	0.978005	0.981924	0.433776	0.502149	0.497759	0.493563	4.00447e-05	0.00151997	Down
T697	E9QM61_MOUSE	22592	Ercc5	0.251268	0.28699	0.261116	0.160185	0.166389	0.190977	0.647445	0.0027127	0.0122941	Down
T1201	E9QLA5_MOUSE	70435	Inf2	0.216194	0.180767	0.239328	0.160507	0.117119	0.127201	0.636233	0.0229589	0.0541925	Down
S985	E9QL25_MOUSE	30841	Kdm2b	2.18935	2.09774	2.28304	1.42801	1.29826	1.27286	0.608684	0.000283827	0.00359742	Down
S1028	SC16A_MOUSE	227648	Sec16a	2.81346	2.37421	2.77772	1.70854	1.77534	1.73973	0.655788	0.00301004	0.0131765	Down
S9	E9QAQ5_MOUSE	56637	Gsk3b	0.216531	0.287436	0.254182	0.137109	0.13039	0.10303	0.488729	0.00492055	0.0181316	Down
S671	E9QAJ9_MOUSE	70497	Arhgap17	4.85432	5.14443	5.96672	3.3401	2.59124	3.20138	0.57203	0.00490931	0.0181082	Down
S1796	E9QAI5_MOUSE	104146	Cad	46.2614	44.2706	48.0642	26.3389	27.2551	27.9736	0.588527	9.07862e-05	0.00211742	Down
S49	E9Q9H3_MOUSE	22791	Dnajc2	1.80148	1.77447	2.07274	0.853041	0.957697	1.05515	0.507354	0.00114823	0.00748423	Down
S1089	E9Q9E1_MOUSE	208643	Eif4g1	3.5204	3.38747	3.65608	1.30887	1.40814	1.38727	0.388518	1.32567e-05	0.000882057	Down
S1206	E9Q9C3_MOUSE	17356	Afdn	0.75255	0.699635	0.569623	0.393053	0.16527	0.288986	0.419085	0.0101382	0.0297727	Down
S216	E9Q9C3_MOUSE	17356	Afdn	4.45766	4.47543	4.29158	2.72467	2.51818	2.50946	0.586201	3.73723e-05	0.00150782	Down
S1802	E9Q9C3_MOUSE	17356	Afdn	0.409518	0.401799	0.513609	0.231096	0.283232	0.287465	0.60516	0.0124339	0.0344578	Down
S1517	E9Q9C3_MOUSE	17356	Afdn	1.21661	1.2203	1.12287	0.700442	0.610871	0.560521	0.525829	0.000409887	0.00420682	Down
S1016	E9Q8V6_MOUSE	102442	Dennd4a	1.72053	1.60003	1.83644	1.05881	1.00906	1.06982	0.608432	0.000681859	0.00550686	Down
S947	E9Q8N5_MOUSE	76499	Clasp2	1.10446	1.04913	1.11389	0.738162	0.39826	0.40068	0.470423	0.00733829	0.0238364	Down
S440	E9Q8A3_MOUSE	107650	Pi4kb	6.76559	6.97544	7.45753	4.9071	4.19287	4.27854	0.631105	0.00102105	0.00694737	Down
S95	E9Q827_MOUSE	59046	Arpp19	4.61618	4.57069	5.36441	3.09556	3.21154	3.09127	0.645879	0.00273369	0.0123565	Down
S1018	E9Q7S1_MOUSE	20402	Zfp106	0.801296	0.878223	1.00592	0.549593	0.569433	0.414876	0.571191	0.00754588	0.0243263	Down
S930	E9Q7S1_MOUSE	20402	Zfp106	0.760619	0.727801	0.484576	0.369525	0.315693	0.343955	0.52163	0.0236423	0.0554051	Down
S44	RN169_MOUSE	108937	Rnf169	0.337532	0.25268	0.259031	0.181581	0.186577	0.192275	0.659921	0.024769	0.0572821	Down
S750	E9Q6L0_MOUSE	76707	Clasp1	1.64045	1.65976	1.58471	0.840932	1.03934	0.796307	0.547926	0.000703218	0.00557061	Down
S482	BD1L1_MOUSE	665775	Bod1l	0.573705	0.474847	0.643994	0.359445	0.380448	0.331146	0.632798	0.0154197	0.0403561	Down
S2841	BD1L1_MOUSE	665775	Bod1l	2.893	3.09907	3.12672	1.79132	1.99945	2.21671	0.658801	0.00193119	0.0101085	Down
S262	BD1L1_MOUSE	665775	Bod1l	0.381575	0.4326	0.420827	0.27202	0.266173	0.240365	0.63041	0.00112767	0.00739412	Down
S417	E9Q6H8_MOUSE	109135	Plekha5	0.166761	0.126387	0.129009	0.0517713	0.0372047	0.081201	0.403114	0.0102483	0.0299543	Down
T719	E9Q616_MOUSE	66395	Ahnak	5.84124	5.8161	5.76206	2.65286	2.4695	2.74089	0.451407	2.79071e-06	0.000434907	Down
S5292	E9Q616_MOUSE	66395	Ahnak	0.840383	0.764655	0.772229	0.194294	0.227716	0.304385	0.305559	0.000170172	0.00280497	Down
S5069	E9Q616_MOUSE	66395	Ahnak	0.13828	0.162495	0.140817	0.0632894	0.0870005	0.0814798	0.52485	0.00264305	0.0121146	Down
S4300	E9Q616_MOUSE	66395	Ahnak	0.865901	0.842433	0.881253	0.461413	0.482801	0.449897	0.538353	1.1446e-05	0.000850742	Down
S42	E9Q616_MOUSE	66395	Ahnak	0.263209	0.298698	0.258492	0.151254	0.125944	0.120856	0.485196	0.000875144	0.00639069	Down
S3140	E9Q616_MOUSE	66395	Ahnak	2.82458	2.81635	2.91484	1.16255	1.2387	1.27797	0.430029	3.92682e-06	0.000502292	Down
S2948	E9Q616_MOUSE	66395	Ahnak	0.215798	0.199589	0.19335	0.152421	0.129787	0.110978	0.645906	0.00635697	0.0216649	Down
S257	E9Q616_MOUSE	66395	Ahnak	0.186856	0.165637	0.170938	0.104543	0.0916351	0.0663979	0.501644	0.00251668	0.0118279	Down
S232	E9Q616_MOUSE	66395	Ahnak	1.28813	1.39837	1.30895	0.326884	0.389236	0.3501	0.266858	1.4203e-05	0.000908821	Down
S1339	E9Q616_MOUSE	66395	Ahnak	0.0703112	0.0944401	0.0747518	0.0520068	0.054478	0.035369	0.592284	0.0269645	0.061082	Down
S1321	E9Q616_MOUSE	66395	Ahnak	1.31891	1.33589	1.30811	0.708189	0.704683	0.78084	0.553561	2.27385e-05	0.00120511	Down
T1827	SETD2_MOUSE	235626	Setd2	0.823691	0.699115	0.846164	0.455951	0.486426	0.575078	0.640555	0.00809764	0.0256294	Down
S890	SETD2_MOUSE	235626	Setd2	0.546115	0.499671	0.577956	0.208229	0.170421	0.210791	0.363014	0.00019291	0.00302486	Down
S633	SETD2_MOUSE	235626	Setd2	4.38924	4.7458	4.86655	2.94509	2.66202	2.72328	0.594961	0.000347994	0.00389266	Down
S132	SETD2_MOUSE	235626	Setd2	0.856676	0.929496	0.84932	0.546863	0.512531	0.570541	0.618456	0.000396185	0.00414078	Down
S386	E9Q5A7_MOUSE	80892	Zfhx4	1.15536	1.09651	1.30125	0.770172	0.763548	0.739505	0.639782	0.00227683	0.0111357	Down
S6	E9Q5A7_MOUSE	80892	Zfhx4	0.24936	0.289346	0.299269	0.163076	0.183593	0.182382	0.631344	0.003465	0.0143475	Down
S1390	E9Q4K7_MOUSE	16554	Kif13b	0.510136	0.563342	0.642717	0.338513	0.351185	0.338909	0.599353	0.00408923	0.0159158	Down
S1769	E9Q3Y4_MOUSE	80877	Lrba	1.94941	2.08444	1.93029	1.23652	1.24552	1.2895	0.63237	0.000139891	0.00250706	Down
S1839	WDFY4_MOUSE	545030	Wdfy4	1.27683	0.99346	0.905524	0.62129	0.707605	0.481822	0.570159	0.0248358	0.057417	Down
S606	E9Q2H1_MOUSE	70790	Ubr5	0.919025	0.713584	0.654504	0.33903	0.386473	0.342242	0.466853	0.00759505	0.0244503	Down
S466	E9Q2B0_MOUSE	269252	Gtf3c4	5.42307	5.69486	3.59295	3.32109	2.46332	2.12392	0.537584	0.0390367	0.0805278	Down
S438	I2BP2_MOUSE	270110	Irf2bp2	0.940582	1.07777	1.18001	0.580166	0.718635	0.709699	0.627978	0.00861563	0.0266834	Down
T379	E9Q0J2_MOUSE	228850	Ralgapb	1.61606	1.48994	1.60927	0.827429	1.25042	0.744913	0.598642	0.0175722	0.0445609	Down
S1512	E9PZP8_MOUSE	235439	Herc1	0.94279	0.966018	1.09072	0.63097	0.673416	0.653457	0.652717	0.00186838	0.00990068	Down
S716	E9PZM7_MOUSE	72193	Scaf11	0.723353	0.748561	0.765549	0.432596	0.524574	0.508716	0.655155	0.00114134	0.0074535	Down
T1314	E9PZ97_MOUSE	12144	Blm	0.447781	0.43733	0.369118	0.227465	0.210304	0.180434	0.492894	0.00168316	0.00938024	Down
S512	E9PYX3_MOUSE	13728	Mark2	1.47657	1.77374	1.6089	0.966931	1.05966	0.951772	0.612932	0.00245678	0.0116744	Down
S1070	PRR12_MOUSE	233210	Prr12	0.299086	0.310053	0.305644	0.195057	0.209906	0.152018	0.608868	0.00250057	0.0117999	Down
S114	E9PY25_MOUSE	67769	Gpatch2	0.197915	0.253647	0.307088	0.167673	0.147999	0.157161	0.623255	0.0409479	0.0833916	Down
S116	E9PY25_MOUSE	67769	Gpatch2	0.197915	0.253647	0.307088	0.167673	0.147999	0.157161	0.623255	0.0409479	0.0833916	Down
S198	E9PXY2_MOUSE	209707	Lcorl	0.240394	0.279138	0.222138	0.161205	0.155747	0.131184	0.604226	0.00696834	0.0231229	Down
T161	E9PXI0_MOUSE	22324	Vav1	2.28532	2.56535	2.60911	0.949218	0.911486	0.967646	0.379146	0.000114394	0.00227362	Down
S967	E9PWG6_MOUSE	54392	Ncapg	1.68935	1.57974	1.78916	0.946404	1.00767	0.962844	0.576666	0.000349998	0.003896	Down
S463	E9PWB1_MOUSE	102693	Phldb1	0.276436	0.296136	0.277136	0.184481	0.157751	0.18201	0.616967	0.000531629	0.00487216	Down
S431	E9PWB1_MOUSE	102693	Phldb1	0.384374	0.380078	0.410401	0.193983	0.186276	0.208499	0.501134	7.03313e-05	0.00195421	Down
S523	KI67_MOUSE	17345	Mki67	3.04436	3.07317	3.19881	2.06764	1.83332	1.80897	0.612894	0.000225746	0.00326111	Down
T527	KI67_MOUSE	17345	Mki67	1.64435	1.7851	1.86928	1.03878	1.0075	0.972402	0.569699	0.000372344	0.00401441	Down
S2390	KI67_MOUSE	17345	Mki67	4.22111	4.12657	4.04109	2.44811	2.42017	2.33529	0.581461	9.89999e-06	0.000808146	Down
T701	KI67_MOUSE	17345	Mki67	0.210735	0.169557	0.174768	0.0844984	0.0997929	0.0693987	0.45705	0.00301934	0.0131962	Down
S373	KI67_MOUSE	17345	Mki67	0.303813	0.401471	0.41546	0.209242	0.254394	0.18841	0.581798	0.0176805	0.0447488	Down
S337	KI67_MOUSE	17345	Mki67	3.75224	3.53616	3.96291	1.93943	2.2062	1.81028	0.529353	0.000481424	0.00461296	Down
S2780	KI67_MOUSE	17345	Mki67	1.60445	1.36687	1.32632	0.772682	1.03445	1.00472	0.654279	0.0144797	0.0387184	Down
S1825	KI67_MOUSE	17345	Mki67	0.871664	0.86444	0.902407	0.55032	0.608793	0.581411	0.659661	0.000128295	0.00241682	Down
S140	E9PVV1_MOUSE	21423	Tcf3	0.775412	0.735259	0.649302	0.47169	0.382039	0.433093	0.595758	0.00303234	0.0132354	Down
S1610	E9PV45_MOUSE	329908	Usp24	2.06591	2.07106	1.94857	1.40172	1.30419	1.03784	0.615189	0.00252951	0.0118557	Down
S815	E9PUK6_MOUSE	51796	Srrm1	2.40078	3.27318	3.15318	1.39819	1.32508	1.24695	0.449773	0.00424401	0.0163579	Down
S389	E9PUK6_MOUSE	51796	Srrm1	30.3269	36.2107	43.8837	22.0168	21.9002	22.048	0.597394	0.0195134	0.0481134	Down
S875	E9PUK6_MOUSE	51796	Srrm1	2.64951	2.80115	3.26037	0.58597	1.19427	0.994298	0.318509	0.00151838	0.00880839	Down
S83	E9PUD0_MOUSE	53861	Zranb2	17.9008	16.264	18.0622	10.8226	11.3818	11.1803	0.639222	0.000462271	0.00452828	Down
S24	D3Z5B1_MOUSE	71970	Zbed5	1.20562	1.05853	1.18704	0.565678	0.478813	0.511543	0.450868	0.000278151	0.00356501	Down
S31	D3Z4U6_MOUSE	546272	Gm5934	0.917851	0.935773	0.604518	0.266359	0.545618	0.30184	0.453114	0.0320402	0.0697459	Down
S557	D3Z197_MOUSE	234135	Nsd3	0.52481	0.453468	0.367355	0.225281	0.217902	0.235964	0.504704	0.00834849	0.0261874	Down
S514	D3Z0K6_MOUSE	242860	Rsbn1l	0.247304	0.197429	0.183676	0.0590025	0.0612164	0.130777	0.399415	0.0145209	0.0387432	Down
S306	SAFB1_MOUSE	224903	Safb	0.14634	0.159411	0.133995	0.0883586	0.106431	0.0971686	0.663923	0.00542948	0.0194921	Down
S19	D3YWA2_MOUSE	69718	Ipmk	0.40824	0.563663	0.399884	0.106297	0.0735955	0.113494	0.213871	0.00276573	0.0124522	Down
S383	ZBED6_MOUSE	667118	Zbed6	0.404542	0.314259	0.374238	0.188291	0.201169	0.237979	0.574031	0.00697317	0.0231229	Down
S116	MFA1B_MOUSE	67532; 100034361	Mfap1b	2.78289	3.41139	3.22041	1.40001	1.92143	1.93091	0.557889	0.00559317	0.0198033	Down
S118	MFA1B_MOUSE	67532; 100034361	Mfap1b	2.44101	2.69199	2.5763	1.40001	1.42958	1.31474	0.537575	0.000121282	0.00234924	Down
S14	OSBL8_MOUSE	237542	Osbpl8	1.41377	1.3734	1.47854	0.81515	0.733264	0.720198	0.531825	9.85534e-05	0.00218023	Down
S58	B8JJF6_MOUSE	77116	Mtmr2	1.09183	1.14498	1.20953	0.339415	0.669427	0.334226	0.389709	0.00377819	0.0152524	Down
S265	B2ZRS5_MOUSE	97998	Deptor	0.337007	0.298963	0.311149	0.207598	0.158264	0.175013	0.571075	0.00178605	0.00968136	Down
S1162	B2RUJ6_MOUSE	192786	Rapgef6	0.474883	0.488842	0.534697	0.252205	0.187696	0.240934	0.454368	0.000532193	0.00487216	Down
S869	B2RUJ2_MOUSE	59079	Erbin	1.61257	1.55055	1.59687	0.934942	0.974491	0.981089	0.607254	1.21071e-05	0.000850742	Down
S356	B2RT41_MOUSE	216345	Zfc3h1	4.92991	5.36598	5.04183	3.07711	3.13782	3.24463	0.616751	0.000149605	0.00257932	Down
S74	UBP42_MOUSE	76800	Usp42	0.981708	1.08855	1.16832	0.566664	0.621608	0.678967	0.576561	0.00191973	0.0100716	Down
T915	DLGP4_MOUSE	228836	Dlgap4	1.43226	1.37239	1.3192	0.663591	0.615474	0.619905	0.460485	3.31089e-05	0.00144381	Down
S150	B1AVP5_MOUSE	237221	Gemin8	0.658975	0.668856	0.525518	0.335594	0.245684	0.307372	0.479483	0.00380544	0.0152982	Down
S365	B1AU76_MOUSE	50927	Nasp	0.717878	0.636653	0.805783	0.445919	0.174171	0.372171	0.459313	0.0147142	0.039044	Down
S3082	B1ARU4_MOUSE	11426	Macf1	7.21223	7.83222	8.08538	4.53627	4.2326	4.44251	0.571184	0.000272335	0.00353674	Down
S3085	B1ARU4_MOUSE	11426	Macf1	5.64895	6.09372	6.28703	3.69321	3.63053	3.7066	0.611787	0.000254465	0.00343581	Down
S2077	B1ARU4_MOUSE	11426	Macf1	0.331708	0.325969	0.360339	0.132594	0.116094	0.0791595	0.322045	0.000269121	0.00352159	Down
S2081	B1ARU4_MOUSE	11426	Macf1	0.331708	0.325969	0.360339	0.132594	0.116094	0.0791595	0.322045	0.000269121	0.00352159	Down
S744	B0QZF8_MOUSE	72344	Usp36	0.992278	1.06799	0.612728	0.38854	0.284158	0.53	0.449943	0.0360394	0.076036	Down
S734	B0QZF8_MOUSE	72344	Usp36	0.912373	1.05935	1.23473	0.59029	0.375477	0.655845	0.505734	0.01374	0.0372835	Down
S1096	DEN4C_MOUSE	329877	Dennd4c	1.91816	1.96642	1.98338	1.36155	1.14052	1.18434	0.628227	0.000493987	0.00467209	Down
S36	A2CF83_MOUSE	104457	0610010K14Rik	1.06946	1.17044	1.1157	0.665831	0.589966	0.693483	0.580905	0.000385346	0.00409028	Down
T1886	ARI1A_MOUSE	93760	Arid1a	1.70806	1.76088	1.66938	1.03262	0.932357	0.997145	0.576476	5.20254e-05	0.00175106	Down
S56	ARI1A_MOUSE	93760	Arid1a	0.591894	0.592166	0.554649	0.454191	0.317632	0.354214	0.647628	0.00873799	0.0269045	Down
S1942	ARI1A_MOUSE	93760	Arid1a	1.20489	1.09782	1.2095	0.751021	0.796016	0.791343	0.665784	0.000564823	0.00506273	Down
S254	PPIG_MOUSE	228005	Ppig	0.758713	0.730042	0.706384	0.420723	0.400387	0.477184	0.591441	0.000406828	0.00419968	Down
S255	PPIG_MOUSE	228005	Ppig	0.758713	0.730042	0.706384	0.420723	0.400387	0.477184	0.591441	0.000406828	0.00419968	Down
S257	PPIG_MOUSE	228005	Ppig	0.758713	0.730042	0.706384	0.420723	0.400387	0.477184	0.591441	0.000406828	0.00419968	Down
S354	PPIG_MOUSE	228005	Ppig	19.0026	21.3208	21.0618	10.9992	9.81807	11.058	0.519266	0.000300224	0.00364361	Down
T356	PPIG_MOUSE	228005	Ppig	19.0026	21.3208	21.0618	10.9992	9.81807	11.058	0.519266	0.000300224	0.00364361	Down
S30	A2AQN4_MOUSE	60525	Acss2	7.74034	7.46488	7.72182	5.06922	4.61017	4.55405	0.620814	9.87146e-05	0.00218023	Down
S4747	A2ANY6_MOUSE	100019	Mdn1	3.35534	4.04295	4.63986	2.1159	1.99547	2.09186	0.515297	0.00644816	0.0218767	Down
S4749	A2ANY6_MOUSE	100019	Mdn1	3.35534	4.04295	4.63986	2.1159	1.99547	2.09186	0.515297	0.00644816	0.0218767	Down
S620	UBR4_MOUSE	69116	Ubr4	2.25888	2.65089	2.44081	1.46058	1.52926	1.55026	0.617651	0.00129617	0.00797669	Down
S183	A2AKD7_MOUSE	20648	Snta1	0.83938	1.32008	1.2304	0.599426	0.599629	0.549002	0.515673	0.0211205	0.0510121	Down
S50	DCA10_MOUSE	242418	Dcaf10	1.4409	1.63873	1.53849	1.07788	0.910077	0.956695	0.637631	0.00182652	0.00980769	Down
S57	DCA10_MOUSE	242418	Dcaf10	0.46691	0.58383	0.56394	0.257128	0.232751	0.206435	0.431239	0.00141907	0.0084506	Down
S67	DCA10_MOUSE	242418	Dcaf10	1.27641	1.46767	1.27557	0.755055	0.82311	0.853159	0.604861	0.00165342	0.00927156	Down
T485	PNISR_MOUSE	66625	Pnisr	1.89856	1.7561	2.03492	0.829809	0.619197	0.9664	0.424531	0.00107399	0.00716376	Down
S372	A2AJI1_MOUSE	245877	Map7d1	0.500403	0.421674	0.452801	0.189896	0.24832	0.264451	0.511076	0.00224169	0.0110505	Down
S277	CARD9_MOUSE	332579	Card9	0.13439	0.0996085	0.099888	0.0506091	0.0526716	0.0554248	0.475327	0.0073839	0.0239392	Down
S1409	A2AFQ9_MOUSE	216766	Gemin5	0.903662	1.03207	0.719289	0.512846	0.259353	0.291543	0.400653	0.0117676	0.0330697	Down
S1413	A2AFQ9_MOUSE	216766	Gemin5	0.903662	1.03207	0.719289	0.512846	0.259353	0.291543	0.400653	0.0117676	0.0330697	Down
S64	A2AES5_MOUSE	54644	Otud5	7.26364	7.61223	7.4531	0.797461	0.782168	0.707475	0.102428	3.58918e-07	0.000232482	Down
S503	A2AES5_MOUSE	54644	Otud5	0.557038	0.484397	0.547683	0.30316	0.31023	0.38665	0.629304	0.00503261	0.0184341	Down
S45	A2AE27_MOUSE	109674	Ampd2	0.792366	0.761228	0.81385	0.325421	0.39985	0.419347	0.483482	0.000230871	0.0032844	Down
S38	A2AE27_MOUSE	109674	Ampd2	3.2936	3.42254	3.39709	2.07979	2.16737	2.17557	0.635082	1.61202e-05	0.000986927	Down
S243	A2AAN3_MOUSE	53413	Exoc7	0.505744	0.454883	0.443733	0.304787	0.264096	0.277392	0.602606	0.00117439	0.00757862	Down
S1436	BLTP1_MOUSE	-	-	1.0172	1.05984	1.04521	0.608588	0.645349	0.677104	0.618479	7.09397e-05	0.00195421	Down
S1428	A2A9M4_MOUSE	67299	Dock7	4.85463	4.99505	4.94176	3.15522	2.94592	2.95696	0.612388	1.76443e-05	0.00104299	Down
S307	MIIP_MOUSE	28010	Miip	0.215711	0.217384	0.223546	0.147502	0.164728	0.113818	0.64883	0.00709414	0.0233419	Down
T1090	ZMYM4_MOUSE	67785	Zmym4	0.169359	0.186381	0.210696	0.0442232	0.128503	0.0833832	0.452142	0.0189257	0.0470751	Down
S1535	BIG2_MOUSE	99371	Arfgef2	0.632047	0.61844	0.670936	0.31518	0.390269	0.380614	0.565239	0.0006024	0.00522868	Down
S1007	ZN335_MOUSE	329559	Znf335	0.271749	0.306685	0.256815	0.189089	0.195603	0.0747853	0.550107	0.0404248	0.0825716	Down
S499	A2A484_MOUSE	228880	Zmynd8	0.507533	0.428537	0.247795	0.149509	0.173907	0.13037	0.383309	0.0353883	0.0750467	Down
S89	A0A7P0A153_MOUSE	231506	Lin54	0.382743	0.383004	0.394174	0.283045	0.191003	0.187783	0.570583	0.00617907	0.0212128	Down
S93	A0A7P0A153_MOUSE	231506	Lin54	0.718209	0.68357	0.80777	0.517994	0.412661	0.448611	0.62423	0.00456451	0.0172199	Down
S379	A0A6Q6PUT5_MOUSE	56194	Prpf40a	0.944222	0.896292	0.949728	0.363364	0.270286	0.396576	0.369224	0.000144411	0.00254557	Down
S1387	A0A6I8MX08_MOUSE	108686	Ccdc88a	0.229073	0.251339	0.222856	0.115164	0.128744	0.135023	0.538816	0.00049182	0.00466446	Down
S822	A0A5H1ZRL7_MOUSE	27223	Trp53bp1	1.68305	1.78345	1.77214	0.974381	1.04301	1.012	0.578279	3.94081e-05	0.00151997	Down
S521	A0A5F8MPZ2_MOUSE	16593	Klc1	1.6404	2.24061	2.29682	0.730129	0.614411	0.61283	0.316838	0.00275311	0.0124116	Down
S460	A0A5F8MPZ2_MOUSE	16593	Klc1	1.62123	1.57623	1.72808	0.979662	0.958078	1.03786	0.604117	0.000217468	0.00319995	Down
S1554	A0A5F8MPF0_MOUSE	16561	Kif1b	1.63663	1.60619	1.5524	1.04173	0.993394	1.08834	0.651371	0.000111428	0.00224641	Down
S36	A0A589P973_MOUSE	215690	Nav1	1.14349	1.17158	0.993202	0.430417	0.590964	0.586302	0.485959	0.00176816	0.00960718	Down
S259	A0A589P973_MOUSE	215690	Nav1	0.306901	0.342573	0.335207	0.21188	0.198227	0.225218	0.645209	0.000958661	0.00675595	Down
S52	A0A3Q4EH87_MOUSE	74157	Cmtr1	0.756178	0.710096	0.8358	0.529177	0.388047	0.508223	0.619201	0.00697692	0.0231229	Down
S54	A0A3Q4EH87_MOUSE	74157	Cmtr1	0.756178	0.710096	0.8358	0.529177	0.388047	0.508223	0.619201	0.00697692	0.0231229	Down
S1279	QSER1_MOUSE	99003	Qser1	0.340492	0.267582	0.260812	0.165319	0.198993	0.188587	0.636331	0.0183514	0.0459758	Down
S104	A0A2R8VI80_MOUSE	83383	Tfap4	4.61319	4.42412	4.81437	2.83914	3.08351	2.94151	0.639934	0.000236316	0.00333419	Down
S951	A0A2I3BPQ5_MOUSE	67302	Zc3h13	1.3567	1.5408	1.78856	0.670466	0.755497	0.766568	0.467884	0.00296411	0.0130539	Down
S153	A0A286YDL6_MOUSE	12325	Camk2g	0.427403	0.439508	0.59739	0.192753	0.259955	0.23739	0.471282	0.0113905	0.0323816	Down
T608	A0A286YDA2_MOUSE	70769	Nolc1	2.72992	2.86574	2.75299	1.70485	1.61846	1.61768	0.591831	2.39942e-05	0.00122845	Down
S92	A0A1Y7VKX7_MOUSE	27225	Ddx24	0.913184	0.691999	1.19927	0.147275	0.193682	0.481392	0.29323	0.0214667	0.0515757	Down
S316	A0A1Y7VJA2_MOUSE	14026	Evl	2.78121	2.82001	2.77476	1.92377	1.75369	1.76876	0.650218	6.42048e-05	0.00189764	Down
S184	A0A1W2P6X3_MOUSE	57778	Fmnl1	12.7361	12.5224	12.5148	8.07899	8.18591	8.21217	0.648	7.4361e-07	0.000268365	Down
S968	A0A1N9PTV1_MOUSE	14123	Fbrs	0.557726	0.549623	0.576124	0.214969	0.212537	0.209622	0.378461	1.64768e-06	0.000352965	Down
S329	A0A1N9PTV1_MOUSE	14123	Fbrs	0.566555	0.644186	0.511091	0.236975	0.233614	0.244467	0.415288	0.000976214	0.00683051	Down
S32	A0A1D5RM43_MOUSE	330836	Slc7a6	0.747957	0.8352	0.843983	0.46499	0.507124	0.49636	0.605022	0.000647949	0.00539853	Down
S219	A0A1B0GRX5_MOUSE	76900	Ssbp4	1.09961	1.0458	1.07433	0.674859	0.630458	0.677349	0.615785	4.56983e-05	0.00163205	Down
S36	A0A1B0GRS5_MOUSE	20288	Msr1	0.603989	0.436453	0.416094	0.307801	0.274014	0.291661	0.599694	0.0322239	0.0700345	Down
S1331	A0A1B0GR85_MOUSE	243219	2900026A02Rik	1.70052	1.62828	1.64495	0.97234	0.950298	1.16579	0.620945	0.000941707	0.00667765	Down
S115	A0A140LIM2_MOUSE	65098	Zfand6	1.84769	1.67038	1.76391	0.813831	0.823835	0.689256	0.44054	0.000124963	0.0023802	Down
S414	A0A140LHY7_MOUSE	67967	Pold3	0.192076	0.18633	0.208866	0.110966	0.0963135	0.108595	0.537866	0.00037366	0.00401596	Down
S103	A0A0U1RNX8_MOUSE	12055	Bcl7c	0.302826	0.329725	0.304848	0.110929	0.06471	0.0783654	0.270967	0.000148772	0.00257932	Down
T118	A0A0U1RNX8_MOUSE	12055	Bcl7c	0.561083	0.527721	0.484162	0.342291	0.296464	0.244	0.561204	0.0031048	0.0133765	Down
S126	A0A0U1RNX8_MOUSE	12055	Bcl7c	0.561083	0.527721	0.484162	0.342291	0.296464	0.244	0.561204	0.0031048	0.0133765	Down
S324	A0A0R4J1T3_MOUSE	330177	Taok3	0.313869	0.365708	0.404944	0.203945	0.140525	0.190072	0.492883	0.00494551	0.0181875	Down
S1804	A0A0R4J1I6_MOUSE	54563	Nup210	1.19817	1.42517	1.49555	0.899767	0.878313	0.815293	0.629629	0.00549269	0.0195959	Down
S1808	A0A0R4J1I6_MOUSE	54563	Nup210	3.06635	3.26477	3.34269	1.89735	2.10996	1.92919	0.613667	0.000295434	0.00363697	Down
S80	A0A0R4J1I2_MOUSE	101206	Tada3	0.326154	0.294271	0.233172	0.155839	0.205769	0.16053	0.611693	0.02494	0.0576385	Down
S19	A0A0R4J1G4_MOUSE	19362	Rad51ap1	1.69015	1.736	1.8693	0.781611	0.854163	0.826261	0.464934	8.17363e-05	0.00201764	Down
S23	A0A0R4J1G4_MOUSE	19362	Rad51ap1	1.92881	2.06693	2.04201	0.954134	1.04504	1.02444	0.500785	3.80454e-05	0.00150913	Down
S22	A0A0R4J1F3_MOUSE	79221	Hdac9	0.639958	0.671298	0.588324	0.387037	0.422717	0.368202	0.620114	0.00115275	0.00750658	Down
S941	A0A0R4J172_MOUSE	229541	Dennd4b	1.61646	1.62378	1.83506	1.05975	0.988591	0.991733	0.598993	0.00084229	0.00622369	Down
S1882	A0A0R4J0V5_MOUSE	20020	Polr2a	1.72663	1.69558	1.50231	0.960418	0.859543	0.885746	0.549436	0.000637269	0.00535497	Down
S1875	A0A0R4J0V5_MOUSE	20020	Polr2a	11.9905	8.16346	8.07028	5.27812	5.56239	5.36353	0.574117	0.0363679	0.0764718	Down
S1858	A0A0R4J0V5_MOUSE	20020	Polr2a	0.910606	0.915046	0.907519	0.667884	0.610535	0.534905	0.663451	0.00135615	0.00822933	Down
S376	A0A0R4J0Q6_MOUSE	384309	Trim56	4.74655	4.7146	4.49337	2.81607	2.84301	2.55083	0.588333	9.80972e-05	0.00218023	Down
S31	A0A0R4J0D5_MOUSE	72825	Mon1a	0.642523	0.530339	0.657152	0.400238	0.330093	0.379832	0.606642	0.00602729	0.0208522	Down
S217	A0A0R4J024_MOUSE	108138	Xrcc4	0.555131	0.667581	0.574805	0.407487	0.340828	0.374663	0.624738	0.00477203	0.0177836	Down
S16	A0A0R4IZY0_MOUSE	50492	Thop1	1.22016	1.10657	1.29341	0.753956	0.799628	0.70541	0.624007	0.0017212	0.00948882	Down
S693	A0A0N4SW73_MOUSE	52055	Rab11fip5	0.418264	0.415829	0.42224	0.289402	0.287958	0.240889	0.651299	0.000808354	0.0060578	Down
S280	A0A0N4SW73_MOUSE	52055	Rab11fip5	1.01542	0.97276	0.975275	0.418958	0.406083	0.35835	0.399327	1.35068e-05	0.000882057	Down
S881	A0A0N4SV80_MOUSE	18139	Zfp638	1.96492	2.02236	2.03488	1.24932	1.24386	1.27768	0.626164	6.1865e-06	0.000627515	Down
S889	A0A0G2JG52_MOUSE	11630	Crybg1	0.301641	0.34296	0.467119	0.106328	0.11903	0.178021	0.362842	0.012257	0.0341235	Down
S67	A0A0G2JFX7_MOUSE	60365	Rbm8a	1.82951	2.42847	2.75949	0.830823	1.03249	0.939277	0.399373	0.00724132	0.0236334	Down
S535	A0A0G2JFJ6_MOUSE	229543	Ints3	1.11937	1.25456	1.27694	0.878273	0.808631	0.259745	0.533201	0.0480029	0.0944784	Down
S420	A0A0G2JEC2_MOUSE	17260	Mef2c	1.78719	2.28101	2.09036	0.777303	1.38969	0.904366	0.498713	0.0119817	0.0335477	Down
S380	A0A0G2JEC2_MOUSE	17260	Mef2c	2.48758	2.04996	2.14488	0.620266	0.703452	0.684773	0.300564	0.000324533	0.00377071	Down
S1431	A0A0A0MQE8_MOUSE	71435	Arhgap21	0.235707	0.233461	0.191342	0.111041	0.156868	0.143389	0.622697	0.0138075	0.0373779	Down
S4410	A0A0A0MQ73_MOUSE	381022	Kmt2d	0.705085	0.792231	0.707471	0.407579	0.465836	0.407901	0.581152	0.000880999	0.00641296	Down
S155	A0A087WQ86	-	-	1.24927	1.33338	1.1997	0.6404	0.963849	0.624906	0.589358	0.0115253	0.0326027	Down
S158	A0A087WQ86	-	-	1.24927	1.33338	1.1997	0.6404	0.963849	0.624906	0.589358	0.0115253	0.0326027	Down
S1283	A0A087WQ86	-	-	0.610889	0.750739	0.699231	0.401195	0.440938	0.445136	0.624628	0.00394624	0.0155962	Down
S579	A0A087WNL7_MOUSE	100043597	Srcap	0.626758	0.63898	0.645428	0.388164	0.211847	0.405739	0.526249	0.00830346	0.0260939	Down
S328	Z4YJL0_MOUSE	228536	Bahd1	0.139852	0.534132	0.395532	0.703925	0.846131	0.832761	2.22794	0.0242602	0.0564287	Up
S182	Z4YJL0_MOUSE	228536	Bahd1	0.267086	0.505631	0.236693	0.733562	0.715155	0.670867	2.09982	0.0131446	0.0359523	Up
S257	S4R1X1_MOUSE	101240	Wdr91	0.239099	0.284665	0.216791	0.386496	0.301671	0.446465	1.53213	0.0476203	0.0940202	Up
S56	PSA5_MOUSE	26442	Psma5	4.07965	3.60784	4.06122	7.06713	6.99957	7.89706	1.86946	0.00048168	0.00461296	Up
S657	MTMR1_MOUSE	53332	Mtmr1	3.80965	1.31225	1.05954	7.63588	7.91237	7.84621	3.78463	0.0028761	0.0128144	Up
S1464	BAZ1B_MOUSE	22385	Baz1b	9.45793	8.46079	7.11976	18.7042	18.8637	18.3587	2.23363	0.000119917	0.00234266	Up
S12	PTSS2_MOUSE	27388	Ptdss2	0.766158	0.429936	0.342522	1.27133	1.33808	1.3773	2.5911	0.00355558	0.0145992	Up
S163	TAGL2_MOUSE	21346	Tagln2	1.26357	0.598769	0.317348	2.64815	2.66522	2.8083	3.72607	0.00225466	0.011094	Up
S214	VAPA_MOUSE	30960	Vapa	4.51574	4.67592	4.69201	13.5981	14.7255	14.6012	3.09175	1.15376e-05	0.000850742	Up
S267	G6PT3_MOUSE	56857	Slc37a2	0.761343	0.71334	0.714741	1.21437	1.267	1.13921	1.65367	0.00029148	0.00360791	Up
T1350	NCOR2_MOUSE	20602	Ncor2	0.590258	0.561135	0.454224	1.08249	1.09396	1.08752	2.03285	0.000183423	0.0029473	Up
S955	NCOR2_MOUSE	20602	Ncor2	1.79968	1.0055	0.600984	2.45859	2.11013	2.07712	1.95112	0.0442031	0.0886519	Up
S755	TRPV2_MOUSE	22368	Trpv2	0.218707	0.168478	0.282204	0.336471	0.358029	0.326441	1.52518	0.0266184	0.0605381	Up
S15	TRPV2_MOUSE	22368	Trpv2	1.64308	1.15918	0.861933	2.86786	3.221	3.07588	2.50116	0.0018298	0.00981762	Up
S253	T176B_MOUSE	65963	Tmem176b	1.03976	0.927385	0.67027	1.75096	1.49014	1.86383	1.93558	0.00614184	0.0211339	Up
S20	CETN2_MOUSE	26370	Cetn2	26.5546	20.8467	18.479	35.0894	32.2839	31.5519	1.50159	0.0137927	0.0373584	Up
S552	CRY2_MOUSE	12953	Cry2	0.975204	0.40004	0.19554	10.2412	9.60998	8.28938	17.915	0.000140033	0.00250706	Up
S988	PCM1_MOUSE	18536	Pcm1	0.196501	0.200406	0.179565	0.311034	0.31392	0.335089	1.66538	0.000209004	0.00311552	Up
S645	PCM1_MOUSE	18536	Pcm1	0.549536	0.471033	0.489946	0.875089	0.852251	0.834012	1.69568	0.000188461	0.00298447	Up
S229	NUMB_MOUSE	18222	Numb	3.85025	3.45892	3.93121	6.97373	7.84347	7.02405	1.94311	0.000370345	0.00400643	Up
S440	NUMB_MOUSE	18222	Numb	12.3994	12.7028	11.7908	18.973	19.183	18.6724	1.54035	2.67265e-05	0.00126389	Up
S308	DOK3_MOUSE	27261	Dok3	2.14849	2.89371	2.84652	4.96626	5.04225	4.81756	1.8794	0.000757145	0.00585729	Up
S314	DOK3_MOUSE	27261	Dok3	0.564567	0.433618	0.540926	1.48459	1.26002	1.19101	2.55707	0.00120205	0.00763836	Up
S724	ADDA_MOUSE	11518	Add1	0.319888	0.10392	0.0737566	0.858678	0.776577	0.679427	4.65203	0.00289476	0.0128725	Up
S402	ADDG_MOUSE	27360	Add3	0.234564	0.247339	0.258271	0.431465	0.365436	0.326593	1.51788	0.015181	0.0399141	Up
S1371	MYO9B_MOUSE	17925	Myo9b	0.188539	0.684439	0.373846	1.02756	0.967721	0.959992	2.37024	0.0176268	0.0446828	Up
S1113	MYO9B_MOUSE	17925	Myo9b	0.97245	0.361753	0.330108	2.1078	2.03704	1.81047	3.57824	0.00326704	0.0138723	Up
S4413	PLEC_MOUSE	18810	Plec	12.1259	11.012	10.4093	20.6113	20.1593	20.9998	1.84129	7.27464e-05	0.00195421	Up
S725	PHC2_MOUSE	54383	Phc2	0.0955599	0.128301	0.0561177	0.168221	0.169225	0.200927	1.92291	0.021389	0.051471	Up
S122	CAF1A_MOUSE	27221	Chaf1a	1.05504	1.00478	0.974499	1.82065	1.70795	2.31089	1.92448	0.0074273	0.0240345	Up
S1938	MY18A_MOUSE	360013	Myo18a	0.481438	0.101623	0.128588	0.5624	0.631665	0.56293	2.46891	0.0488739	0.0959147	Up
S405	ADRM1_MOUSE	56436	Adrm1	0.650066	0.42945	0.374075	0.972274	1.04342	1.0469	2.10692	0.00362519	0.0148228	Up
S126	YBOX3_MOUSE	56449	Ybx3	0.392416	0.432909	0.442381	0.679908	0.696414	0.62419	1.57806	0.000790784	0.00600488	Up
S184	UB2J1_MOUSE	56228	Ube2j1	0.350055	0.386531	0.341018	0.927365	0.728338	0.81034	2.28845	0.00146379	0.00860086	Up
S143	TMM9B_MOUSE	56786	Tmem9b	0.105011	0.147314	0.232822	0.381043	0.421628	0.3519	2.37984	0.00639377	0.0217471	Up
S7	RIPL1_MOUSE	75695	Rilpl1	0.983909	0.880287	0.894902	1.63961	1.60032	1.53051	1.72899	0.000123005	0.00236383	Up
T59	TACC3_MOUSE	21335	Tacc3	0.808425	0.934379	0.928852	12.8625	12.2711	11.9343	13.8745	1.96029e-06	0.000363289	Up
S986	ACINU_MOUSE	56215	Acin1	0.0776728	0.0664412	0.0586763	0.142976	0.105249	0.119337	1.81252	0.0111475	0.0318965	Up
S1003	ACINU_MOUSE	56215	Acin1	22.1722	11.7277	7.06257	29.7607	28.752	28.7627	2.13062	0.0261403	0.0596486	Up
S243	DDX21_MOUSE	56200	Ddx21	1.05801	1.11246	1.56721	1.90131	1.84459	1.967	1.52846	0.016344	0.0420212	Up
T387	DDX21_MOUSE	56200	Ddx21	0.17249	0.212896	0.165378	0.320274	0.273064	0.27304	1.57305	0.00822138	0.0259191	Up
S192	DDX21_MOUSE	56200	Ddx21	0.358211	0.66443	0.312347	1.20311	0.802257	0.897983	2.17481	0.0331479	0.0714539	Up
S364	SPHK2_MOUSE	56632	Sphk2	1.34565	1.34047	1.14244	2.70704	2.59354	2.75516	2.10412	6.8195e-05	0.00195421	Up
S358	SPHK2_MOUSE	56632	Sphk2	0.0609641	0.115596	0.0722716	0.482348	0.33411	0.302976	4.49876	0.00737542	0.0239343	Up
S524	INO1_MOUSE	71780	Isyna1	0.910597	0.679178	1.19998	2.21208	2.10311	1.89647	2.2266	0.00297189	0.013063	Up
S71	TMOD3_MOUSE	50875	Tmod3	1.09917	1.0737	0.981717	1.94838	1.89194	1.82384	1.79553	7.89183e-05	0.00198696	Up
S693	Q9JHF5_MOUSE	27060	Tcirg1	7.24737	7.30172	8.16475	22.7375	23.0771	22.8357	3.0224	1.05548e-06	0.000325799	Up
T124	TSSC4_MOUSE	56844	Tssc4	3.2112	1.18329	0.580764	17.519	14.1655	12.6411	8.90922	0.0013432	0.00817241	Up
S481	DKC1_MOUSE	245474	Dkc1	4.83795	2.05803	0.913028	6.76523	6.32978	6.8312	2.5517	0.0264175	0.0601611	Up
S508	Q9ESU7_MOUSE	20514	Slc1a5	3.53059	3.07237	3.32742	5.06566	5.4312	5.30451	1.59122	0.000328561	0.00378646	Up
S649	M3K20_MOUSE	65964	Map3k20	0.0476192	0.0882297	0.0714054	0.111756	0.130444	0.141914	1.85335	0.015982	0.0414324	Up
T174	SPN90_MOUSE	80987	Nckipsd	2.73576	1.56594	1.16393	3.32974	3.0058	3.34732	1.77159	0.0440143	0.0883701	Up
S175	AFF4_MOUSE	93736	Aff4	6.66162	3.06852	2.59898	13.8847	12.5724	12.1593	3.13213	0.00319048	0.0136561	Up
S195	NEK7_MOUSE	59125	Nek7	0.541012	0.563417	0.549634	1.04792	1.14575	1.10334	1.99328	4.67384e-05	0.00166055	Up
S673	ARHG7_MOUSE	54126	Arhgef7	0.637651	0.237653	0.175979	6.35594	4.57117	3.72773	13.9399	0.00452573	0.0171453	Up
S2348	RBP2_MOUSE	19386	Ranbp2	0.420604	0.344404	0.378536	0.572055	0.575146	0.604053	1.53143	0.00112793	0.00739412	Up
S735	LIMA1_MOUSE	65970	Lima1	0.732577	0.791304	0.859628	1.10238	1.19848	1.29941	1.51049	0.00390416	0.0154834	Up
S390	SYCC_MOUSE	27267	Cars1	0.333073	0.313654	0.367957	1.10689	1.26387	1.18673	3.50601	6.05101e-05	0.00184408	Up
T709	OGA_MOUSE	76055	Oga	0.0726279	0.0747614	0.111927	0.202406	0.159126	0.175336	2.07032	0.00672345	0.0225331	Up
S642	BCAP_MOUSE	83490	Pik3ap1	0.616278	0.653426	0.745066	2.66137	2.66611	2.36037	3.81575	6.27699e-05	0.00188778	Up
S163	SENP3_MOUSE	80886	Senp3	2.06935	1.95798	2.30858	4.44722	4.63168	4.62482	2.16287	3.33946e-05	0.00144381	Up
S175	SENP3_MOUSE	80886	Senp3	0.204963	0.246032	0.329174	0.611168	0.597189	0.525176	2.222	0.00215963	0.0108092	Up
S206	SENP3_MOUSE	80886	Senp3	6.34261	6.08097	6.04573	9.85614	9.82397	9.93284	1.60336	3.01936e-06	0.000454462	Up
T249	RAI14_MOUSE	75646	Rai14	1.35168	0.946294	0.384364	1.79046	1.71228	1.9719	2.04099	0.0328815	0.070969	Up
S14	ETHE1_MOUSE	66071	Ethe1	0.149029	0.137397	0.119538	0.27827	0.230689	0.262545	1.90043	0.00175809	0.00956712	Up
S131	IPP2_MOUSE	66849	Ppp1r2	4.32773	4.33879	5.03844	7.1459	7.77446	7.31581	1.62249	0.00069855	0.00555366	Up
S262	EIF3F_MOUSE	66085	Eif3f	0.38189	0.361293	0.376508	0.721067	0.732968	0.65316	1.88194	0.000211297	0.00312255	Up
S712	RGS3_MOUSE	50780	Rgs3	0.259012	0.0971858	0.0786307	0.992697	0.692899	0.679047	5.43811	0.00537857	0.0193558	Up
S720	Q9DBX5_MOUSE	18783	Pla2g4a	2.97837	3.27121	3.23867	5.87557	5.92344	5.82111	1.85705	9.86448e-06	0.000808146	Up
T99	RGCC_MOUSE	66214	Rgcc	1.27998	1.24621	1.17247	2.98893	2.87662	3.04457	2.40901	7.77221e-06	0.00072019	Up
S8	RIOK3_MOUSE	66878	Riok3	0.317097	0.300835	0.49103	0.637384	0.586991	0.650794	1.69092	0.0161656	0.0416876	Up
S994	MYPT1_MOUSE	17931	Ppp1r12a	0.394269	0.32713	0.377692	1.09291	1.28708	1.01884	3.0924	0.000745947	0.00582569	Up
S499	XRN2_MOUSE	24128	Xrn2	23.1463	17.8415	12.3586	36.7906	37.4454	38.2054	2.10776	0.00329952	0.0139322	Up
S501	XRN2_MOUSE	24128	Xrn2	23.1463	17.8415	12.3586	36.3894	37.0921	37.889	2.08769	0.00354313	0.0145568	Up
S14	PGAM1_MOUSE	18648	Pgam1	2.35948	2.16024	2.24125	4.02211	3.83871	3.76852	1.72007	6.94373e-05	0.00195421	Up
T238	Q9DBE5_MOUSE	22695	Zfp36	0.177826	0.197689	0.143322	0.349608	0.387135	0.410942	2.21203	0.000931058	0.00665028	Up
S73	Q9DBE5_MOUSE	22695	Zfp36	0.0834317	0.124603	0.107812	0.544326	0.569161	0.541637	5.24028	7.23223e-06	0.000688769	Up
S166	Q9DBE5_MOUSE	22695	Zfp36	0.702591	0.681869	0.737142	4.15855	3.98361	4.00668	5.72626	5.1335e-07	0.000234669	Up
S22	SNX5_MOUSE	69178	Snx5	1.61733	1.67402	1.24265	2.893	2.54565	2.42521	1.73442	0.00469565	0.0175562	Up
S295	RL4_MOUSE	67891	Rpl4	7.71587	2.96341	1.78406	12.4259	11.5271	10.8412	2.79173	0.0163972	0.0421423	Up
S15	ISCU_MOUSE	66383	Iscu	0.739907	0.656221	0.705008	1.71962	1.46331	1.6958	2.32195	0.000408515	0.00419968	Up
S199	PHF6_MOUSE	70998	Phf6	0.23475	2.52678	2.93069	21.9103	15.5821	14.5214	9.13772	0.00326278	0.0138704	Up
S804	AMOL1_MOUSE	75723	Amotl1	0.337292	0.421255	0.339539	0.703045	0.677785	0.660156	1.85868	0.000487353	0.00464136	Up
S76	TRM44_MOUSE	78890	Trmt44	0.586121	0.658726	0.467642	1.02522	0.816405	0.840091	1.56598	0.0201069	0.0492469	Up
S42	KAT8_MOUSE	67773	Kat8	0.232587	0.0964005	0.0587446	0.529214	0.466772	0.490543	3.83391	0.00279613	0.0125396	Up
S186	TOM34_MOUSE	67145	Tomm34	1.10246	0.351955	0.266978	2.9657	2.97021	2.79201	5.07026	0.00100887	0.00691091	Up
S229	BIEA_MOUSE	109778	Blvra	0.170881	0.175646	0.185578	0.458166	0.498964	0.341829	2.44118	0.00566524	0.0199622	Up
T387	PAIRB_MOUSE	66870	Serbp1	1.91197	1.84011	1.76659	3.4067	3.54062	3.502	1.89345	9.12545e-06	0.000763088	Up
S329	PAIRB_MOUSE	66870	Serbp1	45.6881	45.6968	45.2211	73.5146	84.3177	88.8813	1.80602	0.00129249	0.00797669	Up
S327	PAIRB_MOUSE	66870	Serbp1	14.5826	15.2287	15.3896	32.5092	29.4318	32.4723	2.08875	9.76974e-05	0.00218023	Up
S32	TBC15_MOUSE	66687	Tbc1d15	0.116629	0.110329	0.123551	0.158651	0.203223	0.187047	1.56606	0.00820822	0.0258895	Up
S58	RANB3_MOUSE	71810	Ranbp3	0.0863292	0.758382	0.098353	1.01005	1.79914	1.5242	4.595	0.0243389	0.0565543	Up
S148	RANB3_MOUSE	71810	Ranbp3	6.56719	4.63451	3.72425	8.2584	8.37582	8.83965	1.70668	0.0148074	0.0392087	Up
S146	CATIN_MOUSE	70312	Cactin	0.14903	0.147228	0.13414	0.189266	0.244666	0.22636	1.53414	0.0106676	0.03089	Up
S98	MSD3_MOUSE	66665	Msantd3	0.725149	0.716772	0.845953	1.18389	1.24431	1.30356	1.63111	0.000887108	0.00644375	Up
S36	RAMAC_MOUSE	67148	Ramac	0.718138	0.638412	0.688272	0.970895	1.32964	0.913255	1.57167	0.0421826	0.085424	Up
S71	M1IP1_MOUSE	68041	Mid1ip1	0.463664	0.36341	0.286617	0.722376	0.633766	0.664908	1.81473	0.00623649	0.0213391	Up
S142	RL17_MOUSE	319195	Rpl17	1.69493	1.84786	1.75174	2.84787	2.88201	2.71943	1.59586	9.42535e-05	0.00212235	Up
S46	Q9CPQ9_MOUSE	353204	Aldoart1	2.76435	1.65351	0.707096	4.60078	4.18493	4.44336	2.5813	0.0112273	0.0320106	Up
S953	RTN4_MOUSE	68585	Rtn4	0.163394	0.104333	0.0873076	2.76767	2.26993	1.91515	19.5833	0.000897616	0.00648573	Up
S54	LPXN_MOUSE	107321	Lpxn	0.442537	0.501874	0.492235	2.14534	1.8825	1.76887	4.03489	0.000210653	0.00312041	Up
S437	DSRAD_MOUSE	56417	Adar	0.24202	0.188797	0.183857	0.494425	0.46003	0.453278	2.29021	0.000303398	0.00366268	Up
S562	CT2NL_MOUSE	80281	Cttnbp2nl	2.23375	2.45854	2.17296	3.8403	3.43984	3.83446	1.61897	0.000865977	0.00635329	Up
S723	RBM10_MOUSE	236732	Rbm10	1.29208	0.672112	0.3254	11.0965	8.37735	6.89719	11.5178	0.00312956	0.0134542	Up
S237	TALDO_MOUSE	21351	Taldo1	0.0730753	0.0858068	0.0885098	0.226736	0.178586	0.185356	2.38762	0.00192156	0.0100735	Up
S320	ATAD3_MOUSE	108888	Atad3	0.468409	0.492658	0.652441	1.01453	1.00264	0.95349	1.84112	0.00172917	0.00949311	Up
S1080	CIC_MOUSE	71722	Cic	3.20588	2.16109	1.31231	5.3159	5.03285	4.95959	2.29191	0.00673418	0.022547	Up
S189	ASHWN_MOUSE	98404	AI597479	10.488	10.3195	10.0539	17.3201	17.6267	17.3174	1.69351	1.62153e-06	0.000352965	Up
S199	CLIP1_MOUSE	56430	Clip1	0.853091	0.741892	0.694791	1.24801	1.17289	1.16283	1.5651	0.00133935	0.00815626	Up
S203	CLIP1_MOUSE	56430	Clip1	3.10549	3.03962	3.01854	5.07804	5.16819	4.98762	1.66242	4.12262e-06	0.000502292	Up
S146	CLIP1_MOUSE	56430	Clip1	1.9532	1.40548	1.02184	2.54352	2.38272	2.31018	1.65195	0.0269473	0.061082	Up
S888	BMP2K_MOUSE	140780	Bmp2k	0.315937	0.317448	0.370058	0.691771	0.620756	0.619234	1.92513	0.000486925	0.00464136	Up
S119	Q91Z78_MOUSE	12177	Bnip3l	3.24611	1.80206	1.52924	4.06267	4.28632	3.69697	1.83141	0.031171	0.0682407	Up
T14	UIF_MOUSE	69823	Fyttd1	0.630927	0.747106	0.710979	2.19291	1.87676	1.93541	2.87461	0.000223117	0.00324823	Up
S23	UIF_MOUSE	69823	Fyttd1	0.0828001	0.196313	0.115725	0.452586	0.509739	0.548314	3.82597	0.00104581	0.00703053	Up
S117	UIF_MOUSE	69823	Fyttd1	0.144799	0.20344	0.333979	0.698876	0.71412	0.781638	3.21691	0.00120076	0.00763836	Up
S23	Q91YS7_MOUSE	26396	Map2k2	1.05581	1.07662	1.21186	1.75739	1.79472	1.75035	1.58553	0.00021182	0.00312355	Up
S128	Q91VK2_MOUSE	66656	Eef1d	22.5435	9.63338	4.44296	86.2226	68.3973	59.0683	5.83531	0.00356745	0.0146217	Up
S843	Q91UZ1_MOUSE	18798	Plcb4	0.0915694	0.088675	0.114807	0.19461	0.205356	0.22414	2.11524	0.000783077	0.00598101	Up
S268	RB40C_MOUSE	224624	Rab40c	0.574177	0.571678	0.548537	0.954839	0.926736	0.806259	1.58631	0.00202147	0.0103134	Up
S11	RCC1_MOUSE	100088	Rcc1	2.30281	0.746828	0.698473	15.1342	12.5742	10.8827	10.2961	0.000984617	0.00683121	Up
T657	SMG8_MOUSE	74133	Smg8	0.0872204	0.0816576	0.114639	0.147223	0.187622	0.145164	1.69305	0.0188819	0.047064	Up
S1281	PHIP_MOUSE	83946	Phip	0.369889	0.279143	0.277355	0.84462	0.949275	0.84264	2.84604	0.000256931	0.00343581	Up
S1283	PHIP_MOUSE	83946	Phip	0.369889	0.279143	0.277355	0.84462	0.949275	0.84264	2.84604	0.000256931	0.00343581	Up
S335	S35C2_MOUSE	228875	Slc35c2	2.1895	1.70275	1.51405	2.8884	2.87644	2.61907	1.55077	0.0106532	0.0308721	Up
S209	SWAP1_MOUSE	66962	Swsap1	1.04435	1.0101	1.14587	7.08582	7.16388	7.29223	6.73119	1.19712e-07	0.000195815	Up
S152	MAVS_MOUSE	228607	Mavs	0.648117	0.515904	0.531002	0.984998	0.807855	0.795863	1.52725	0.0158308	0.0411337	Up
S202	Q8R5L1_MOUSE	12261	C1qbp	0.351363	0.319838	0.312418	0.681492	0.565386	0.550211	1.82702	0.00327444	0.0138723	Up
S28	Q8R5F9_MOUSE	246735	AY074887	5.97821	4.94531	5.55546	9.38945	9.60496	9.98397	1.75851	0.000274312	0.00354831	Up
S274	SH3K1_MOUSE	58194	Sh3kbp1	0.213457	0.210815	0.206143	0.445721	0.417511	0.305181	1.85341	0.0140006	0.0377515	Up
S427	ETV3_MOUSE	27049	Etv3	0.895158	0.724506	0.728703	1.32534	1.44131	1.51418	1.8229	0.00120903	0.00765495	Up
S159	ETV3_MOUSE	27049	Etv3	1.086	1.71988	1.66823	4.04026	4.24784	3.28208	2.58603	0.00269157	0.0122469	Up
S55	NUP35_MOUSE	69482	Nup35	0.255056	0.316861	0.301239	0.485114	0.533596	0.526008	1.76912	0.000723101	0.00569514	Up
S258	NUP35_MOUSE	69482	Nup35	2.10102	2.03883	2.09623	3.03831	3.15348	3.19156	1.50469	3.10194e-05	0.0013867	Up
S190	ARHGC_MOUSE	69632	Arhgef12	0.210326	0.159499	0.165319	0.266503	0.271192	0.346734	1.65269	0.0189395	0.0470751	Up
S132	ARP8_MOUSE	56249	Actr8	1.46509	0.562127	0.436338	2.47004	2.63419	2.55247	3.10799	0.00614261	0.0211339	Up
T722	NIBA2_MOUSE	227737	Niban2	1.42017	1.37615	1.24266	2.33543	2.36113	2.50151	1.78215	0.000143451	0.00253516	Up
S297	BUD13_MOUSE	215051	Bud13	0.148928	0.101633	0.0838165	6.29094	4.94847	5.33032	49.554	0.000172456	0.0028358	Up
S71	NU133_MOUSE	234865	Nup133	0.249359	0.285845	0.307152	0.627347	0.655428	0.554818	2.18149	0.000646407	0.00539223	Up
S37	NU133_MOUSE	234865	Nup133	0.341589	0.745792	0.637645	1.0366	1.11258	1.14895	1.91193	0.0138501	0.037434	Up
S74	DDX54_MOUSE	71990	Ddx54	2.41425	2.44482	2.42832	3.89718	3.9813	3.63643	1.58011	0.000172958	0.00283726	Up
S687	MRTFA_MOUSE	223701	Mrtfa	0.102155	0.112585	0.0788616	0.144851	0.170379	0.179303	1.68437	0.00953786	0.0285594	Up
S639	ARHG6_MOUSE	73341	Arhgef6	4.16926	2.32697	1.97518	6.93921	6.3619	6.389	2.3243	0.0060961	0.0210267	Up
S224	ARHG6_MOUSE	73341	Arhgef6	44.0526	17.8611	14.2899	58.5931	63.0686	59.0164	2.37099	0.0214006	0.051471	Up
S159	PO121_MOUSE	107939	Pom121	0.525189	0.23318	0.179237	3.24275	2.90193	2.7155	9.4498	0.000149292	0.00257932	Up
S145	CASC3_MOUSE	192160	Casc3	7.88604	3.76506	2.80795	11.7546	11.9651	12.0813	2.47602	0.0103555	0.030216	Up
S434	CHAP1_MOUSE	101994	Champ1	2.29329	1.68947	1.55852	4.49905	3.79608	3.4775	2.12453	0.00530429	0.0191429	Up
S312	C2D1A_MOUSE	212139	Cc2d1a	0.1894	0.202812	0.19276	0.535416	0.506207	0.312939	2.3156	0.0214097	0.0514749	Up
T233	PKHO2_MOUSE	102595	Plekho2	9.01406	9.43728	9.70392	20.8385	21.3422	21.1638	2.24983	1.21797e-06	0.000325799	Up
S5	PKHO2_MOUSE	102595	Plekho2	0.507278	0.480055	0.455777	1.58944	1.44886	1.40975	3.08226	5.96843e-05	0.00182703	Up
T849	PKN3_MOUSE	263803	Pkn3	0.17615	0.131399	0.137158	0.278646	0.219652	0.268898	1.72517	0.00955208	0.0285771	Up
S177	BCLF1_MOUSE	72567	Bclaf1	1.05976	0.904155	0.239478	3.32455	3.17645	2.79989	4.22117	0.00132977	0.0081051	Up
S155	SPF45_MOUSE	76938	Rbm17	41.4011	28.8253	28.3273	52.4733	53.3489	52.7175	1.60866	0.00954639	0.0285725	Up
S388	AGO2_MOUSE	239528	Ago2	0.561641	0.476092	0.540601	0.86262	0.782031	0.787768	1.54113	0.00146602	0.00860658	Up
S296	CIP4_MOUSE	106628	Trip10	0.411578	0.75255	0.965446	1.52987	1.54881	1.59703	2.19561	0.00642069	0.0218278	Up
S751	S26A6_MOUSE	171429	Slc26a6	0.0635839	0.0865272	0.0836207	0.352627	0.256557	0.265716	3.74318	0.0024489	0.0116612	Up
S141	PAK2_MOUSE	224105	Pak2	4.20512	4.55982	4.47322	10.4776	10.1955	10.7176	2.37123	5.19278e-06	0.000574305	Up
S221	GPR84_MOUSE	80910	Gpr84	0.463491	0.432848	0.525681	1.11687	0.964061	1.04047	2.19505	0.000399612	0.00415803	Up
S23	EI2BE_MOUSE	224045	Eif2b5	0.19399	0.178834	0.128488	0.780076	0.609343	0.761004	4.28959	0.000670003	0.00547581	Up
S934	ZC3H3_MOUSE	223642	Zc3h3	0.56067	0.541792	0.790856	1.9892	1.32419	1.44061	2.51094	0.0123297	0.0342842	Up
S1151	F193A_MOUSE	231128	Fam193a	0.149445	0.130744	0.166928	0.278988	0.375581	0.34561	2.23695	0.00373233	0.0151525	Up
S697	ASPP2_MOUSE	209456	Tp53bp2	2.22217	0.804958	0.601796	4.31568	4.3252	4.12487	3.51778	0.00405925	0.0158561	Up
S312	ZN263_MOUSE	74120	Znf263	0.902519	0.727895	0.60983	1.34184	1.40151	1.3498	1.8271	0.00208379	0.0105295	Up
S746	VCIP1_MOUSE	70675	Vcpip1	0.627005	1.04248	0.818543	1.36259	1.2663	1.29539	1.57726	0.0178462	0.0449894	Up
S1514	DIDO1_MOUSE	23856	Dido1	0.258069	0.126783	0.107541	0.604182	0.613804	0.567083	3.62529	0.000951208	0.00671723	Up
S11	TM163_MOUSE	72160	Tmem163	0.148031	0.133199	0.169736	0.206302	0.224537	0.299221	1.61888	0.0374314	0.0780618	Up
S500	LIPB1_MOUSE	67533	Ppfibp1	9.15002	4.5813	3.26664	32.0038	31.2932	31.965	5.60432	0.00013112	0.00244319	Up
S374	UBP20_MOUSE	74270	Usp20	0.431105	0.474786	0.473206	0.741386	0.718233	0.691216	1.5596	0.000226188	0.00326111	Up
S772	Q8C605_MOUSE	56421	Pfkp	0.218571	0.429117	0.178308	0.580881	0.584025	0.654708	2.20293	0.0152468	0.039991	Up
S281	CX038_MOUSE	69155	1810030O07Rik	0.0726674	0.0794162	0.0869856	0.143508	0.147268	0.131819	1.76767	0.00060083	0.00522829	Up
S280	RBM14_MOUSE	56275	Rbm14	0.151564	0.119087	0.136828	0.263077	0.278459	0.260846	1.96914	0.000269628	0.00352159	Up
S68	GPAT3_MOUSE	231510	Gpat3	1.03683	0.973215	0.953314	1.8144	1.88398	2.18309	1.98473	0.00110174	0.00729917	Up
S563	NCBP3_MOUSE	66874	Ncbp3	0.331793	0.426562	0.598663	2.14912	1.93258	2.30867	4.70912	0.00023466	0.00332452	Up
S363	RHG25_MOUSE	232201	Arhgap25	0.806611	0.371892	0.28707	2.78616	2.39164	2.62461	5.32379	0.000433046	0.00436864	Up
T246	LATS1_MOUSE	16798	Lats1	0.459162	0.215279	0.113367	1.15336	1.13781	1.28751	4.54258	0.00118938	0.00760073	Up
S1150	ZC3H6_MOUSE	78751	Zc3h6	1.21688	1.06085	1.19156	2.35337	2.33078	2.26303	2.00248	3.09202e-05	0.0013867	Up
S122	FA53C_MOUSE	66306	Fam53c	0.0664884	0.082439	0.090342	0.277272	0.246029	0.297287	3.42956	0.000299486	0.00364361	Up
S532	KANK2_MOUSE	235041	Kank2	0.0906999	0.444955	0.371813	0.598202	0.823055	0.650254	2.28274	0.0383559	0.0793622	Up
S415	SNX17_MOUSE	266781	Snx17	0.348153	0.269935	0.128673	0.477188	0.590498	0.5607	2.1806	0.0155227	0.0405483	Up
T260	GEPH_MOUSE	268566	Gphn	0.549929	0.59081	0.650684	1.13634	1.12166	1.2667	1.96754	0.000451233	0.00447559	Up
S143	PTN7_MOUSE	320139	Ptpn7	0.887189	0.74966	0.691447	1.26647	1.24689	1.37696	1.67089	0.00181697	0.00978711	Up
S2152	FLNA_MOUSE	192176	Flna	6.42895	6.6604	6.58486	13.8538	12.9972	13.0066	2.02588	2.10441e-05	0.00115161	Up
S968	FLNA_MOUSE	192176	Flna	0.857919	0.720208	0.817347	3.13926	2.94998	3.15622	3.85955	7.98768e-06	0.000721813	Up
S2180	FLNA_MOUSE	192176	Flna	0.207074	0.687645	0.327526	0.834316	0.80707	0.857217	2.04427	0.0427149	0.0862163	Up
S773	SRRM2_MOUSE	75956	Srrm2	4.26706	3.9642	4.11272	6.72504	7.54151	7.12543	1.73299	0.000276725	0.00355338	Up
S775	SRRM2_MOUSE	75956	Srrm2	4.26706	3.9642	4.11272	6.72504	7.54151	7.12543	1.73299	0.000276725	0.00355338	Up
S1996	SRRM2_MOUSE	75956	Srrm2	2.33712	1.11605	0.14458	8.80442	8.11422	7.55483	6.80242	0.0006764	0.00548778	Up
S1998	SRRM2_MOUSE	75956	Srrm2	2.33712	1.11605	0.14458	8.80442	8.11422	7.55483	6.80242	0.0006764	0.00548778	Up
S1414	SRRM2_MOUSE	75956	Srrm2	1.6119	1.50954	1.44618	2.74561	2.77384	2.75876	1.81237	1.45794e-05	0.000917167	Up
S1062	SRRM2_MOUSE	75956	Srrm2	1.48496	1.63707	1.67918	2.46728	2.4977	2.59693	1.575	0.00020212	0.00310053	Up
S2656	SRRM2_MOUSE	75956	Srrm2	0.0413256	0.981132	0.177733	1.47593	1.56018	1.67048	3.92153	0.0173222	0.0440573	Up
S2052	SRRM2_MOUSE	75956	Srrm2	10.1425	7.70744	7.30515	10.7476	13.6014	13.6194	1.50937	0.0305199	0.067105	Up
T2056	SRRM2_MOUSE	75956	Srrm2	1.17189	0.334502	0.331206	5.60232	4.566	4.98633	8.24699	0.000416143	0.00424301	Up
S422	SRRM2_MOUSE	75956	Srrm2	14.5056	13.2662	12.9963	26.3591	26.7893	27.9551	1.98938	3.54866e-05	0.00149616	Up
S2535	SRRM2_MOUSE	75956	Srrm2	26.387	9.12822	5.91544	109.316	96.0468	82.0671	6.9376	0.00125826	0.00787078	Up
S90	Q8BSN6_MOUSE	53330	Vamp4	0.14435	0.314278	0.228101	0.665088	0.60338	0.467428	2.52778	0.0101374	0.0297727	Up
S462	CE295_MOUSE	319675	Cep295	0.117509	0.133848	0.122866	0.205298	0.186494	0.195747	1.57003	0.000606623	0.00523059	Up
S1027	TICRR_MOUSE	77011	Ticrr	0.365757	0.404589	0.355363	1.72305	1.53246	1.68036	4.38468	2.87828e-05	0.00131576	Up
S115	SFR1_MOUSE	67788	Sfr1	3.21388	2.72719	2.17953	5.41669	5.46765	5.46628	2.01347	0.000785937	0.00598796	Up
S134	HIRP3_MOUSE	233876	Hirip3	11.5483	9.86118	7.90509	16.2318	15.9238	15.6828	1.6319	0.00439472	0.0167951	Up
T135	HIRP3_MOUSE	233876	Hirip3	2.98162	2.94616	2.35798	7.11685	6.94312	6.41762	2.47142	0.000153893	0.00262499	Up
S418	PHF20_MOUSE	228829	Phf20	0.508047	0.350752	0.0835171	0.721308	0.735425	0.794846	2.38941	0.0256965	0.0589103	Up
S1261	DOP1_MOUSE	320615	Dop1a	0.252812	0.312431	0.313293	0.451744	0.451785	0.47044	1.56393	0.00140378	0.00841408	Up
S305	NOP53_MOUSE	68077	Nop53	3.39733	3.379	3.85071	5.88848	5.40403	5.39901	1.57067	0.000834233	0.00619084	Up
S276	MIGA2_MOUSE	108958	Miga2	0.315074	0.394245	0.331017	0.565227	0.608168	0.536717	1.64381	0.00218577	0.0108965	Up
S303	SGTA_MOUSE	52551	Sgta	0.0811395	1.40537	1.16276	2.04392	2.13915	2.26715	2.43472	0.0371446	0.0776301	Up
T305	SGTA_MOUSE	52551	Sgta	0.0811395	1.99251	1.24227	2.81981	2.98949	3.31864	2.75276	0.0280561	0.0630963	Up
S307	SGTA_MOUSE	52551	Sgta	0.0811395	1.52701	1.16276	2.04392	2.13915	2.40148	2.37632	0.0467266	0.0926559	Up
S474	UBP1_MOUSE	230484	Usp1	0.533086	0.288561	0.204362	0.861981	0.805957	0.799867	2.40525	0.00877665	0.0269993	Up
S515	ZC3HE_MOUSE	75553	Zc3h14	15.2981	8.01972	5.07985	22.003	22.1648	22.5916	2.35088	0.0136589	0.0371075	Up
S400	PRUN1_MOUSE	229589	Prune1	0.206633	0.221148	0.195696	0.370537	0.32669	0.310137	1.61572	0.00277333	0.0124782	Up
S22	TB10B_MOUSE	68449	Tbc1d10b	1.56321	0.848203	0.740298	11.3112	9.57538	8.93883	9.46324	0.000296695	0.00364286	Up
S85	NRDC_MOUSE	230598	Nrdc	0.625556	0.625433	0.587102	1.03746	1.12391	1.04463	1.7442	0.000116825	0.00230855	Up
S144	SESQ1_MOUSE	231717	Pheta1	0.169863	0.223629	0.219517	0.334963	0.31107	0.313597	1.56544	0.00360144	0.0147345	Up
S126	Q8BH40_MOUSE	53331	Stx7	2.22419	1.05229	0.625414	3.67076	3.55004	3.74178	2.80955	0.00809636	0.0256294	Up
S129	Q8BH40_MOUSE	53331	Stx7	2.88069	1.44234	1.02418	6.32897	5.58023	5.17882	3.19569	0.00395416	0.0156159	Up
S205	Q8BH40_MOUSE	53331	Stx7	0.0550938	0.0872158	0.0410549	0.204511	0.226857	0.199739	3.44182	0.000738123	0.00579011	Up
S80	AR6P6_MOUSE	65103	Arl6ip6	2.66915	1.47043	1.11793	3.68935	3.41441	3.78559	2.0712	0.0176765	0.0447488	Up
S13	ZKSC1_MOUSE	74570	Zkscan1	5.09485	1.68447	0.69717	39.1862	35.8339	31.4043	14.2345	0.000228458	0.00326774	Up
S422	IF4B_MOUSE	75705	Eif4b	0.108823	0.873932	0.473203	1.65196	1.74877	1.58612	3.42513	0.00647565	0.0219397	Up
S103	SH3L2_MOUSE	212531	Sh3bgrl2	0.281753	0.274756	0.211849	0.807648	0.925545	0.770669	3.25872	0.00036368	0.00397095	Up
S14	PSD11_MOUSE	69077	Psmd11	0.761542	0.626875	0.103965	1.43885	1.19462	0.954753	2.40436	0.0460214	0.0914325	Up
S112	ROA3_MOUSE	229279	Hnrnpa3	1.93937	1.40443	2.57173	5.04658	5.21109	4.1389	2.43369	0.0039776	0.0156325	Up
T207	TOPRS_MOUSE	106021	Topors	0.578955	0.582492	0.535187	0.845738	0.819317	0.907959	1.51654	0.000652413	0.00541597	Up
S683	R12BA_MOUSE	72397	Rbm12b1	1.93925	0.581815	0.594942	7.10349	6.25526	6.16524	6.26572	0.000536704	0.00490029	Up
S214	NUCKS_MOUSE	98415	Nucks1	19.8352	21.1168	19.9238	31.618	31.1023	34.0048	1.58889	0.000264764	0.00350115	Up
S578	TBCD5_MOUSE	72238	Tbc1d5	0.410787	0.111511	0.0648774	4.46988	3.59864	2.93883	18.7463	0.00160037	0.00910685	Up
S2478	FLNB_MOUSE	286940	Flnb	1.63076	1.69673	1.57709	2.65913	2.66838	2.68448	1.63357	8.10552e-06	0.000721813	Up
T96	LYRIC_MOUSE	67154	Mtdh	2.28934	2.11723	2.22189	3.8984	4.19382	4.02625	1.82825	5.06328e-05	0.00174397	Up
S423	LYRIC_MOUSE	67154	Mtdh	19.5175	17.1256	17.6124	30.9022	31.3948	30.1122	1.70322	0.000100812	0.00218065	Up
S776	RUSC2_MOUSE	100213	Rusc2	0.504093	0.549408	0.533583	1.86973	1.78006	1.70959	3.37688	1.2832e-05	0.00087989	Up
S541	RUSC2_MOUSE	100213	Rusc2	0.0495074	0.072413	0.077224	0.165927	0.190438	0.189907	2.7431	0.00059967	0.00522483	Up
S534	RUSC2_MOUSE	100213	Rusc2	3.13516	2.96425	3.30541	6.32464	6.52053	6.69866	2.07806	2.07347e-05	0.00115161	Up
S843	PHF8_MOUSE	320595	Phf8	0.239711	0.15232	0.100386	0.312232	0.293848	0.332073	1.9052	0.024291	0.0564715	Up
S615	PHF8_MOUSE	320595	Phf8	0.161067	0.117607	0.0864352	0.208408	0.261477	0.235142	1.931	0.0129166	0.0354817	Up
S274	ASTRB_MOUSE	235283	Gramd1b	2.70783	2.69293	2.74796	4.50635	4.62248	4.64523	1.69033	2.17158e-06	0.000391855	Up
S723	FNIP2_MOUSE	329679	Fnip2	0.342239	0.324941	0.342812	0.569244	0.498602	0.577529	1.6291	0.00118591	0.00760073	Up
S588	FNIP2_MOUSE	329679	Fnip2	0.166231	0.344477	0.283337	1.18323	1.10532	0.879607	3.98989	0.00165951	0.0092816	Up
S217	FNIP2_MOUSE	329679	Fnip2	0.190388	0.2555	0.261032	0.937275	1.11476	1.11332	4.47767	0.000203317	0.00310085	Up
T457	DCAF5_MOUSE	320808	Dcaf5	0.200561	0.175726	0.111977	0.364902	0.270509	0.376131	2.07171	0.0149615	0.0394883	Up
S1692	MRCKB_MOUSE	217866	Cdc42bpb	0.619522	4.62029	4.249	15.7252	16.6626	17.1788	5.22368	0.00057736	0.00512513	Up
S730	CTDP1_MOUSE	67655	Ctdp1	1.55925	0.753087	0.935006	3.16543	2.63845	2.383	2.52111	0.0080121	0.0254089	Up
S1621	MYCB2_MOUSE	105689	Mycbp2	0.490881	0.35685	0.414598	1.07491	0.964455	0.978052	2.39036	0.000358606	0.00393618	Up
S305	S7A6O_MOUSE	66432	Slc7a6os	0.859688	1.05527	1.27605	1.58627	1.61872	1.68173	1.5314	0.0102048	0.0299014	Up
T1237	SBNO2_MOUSE	216161	Sbno2	0.687046	0.446418	0.469307	1.29955	1.24512	1.24853	2.36665	0.00074983	0.00583608	Up
S2595	HUWE1_MOUSE	59026	Huwe1	0.402356	0.579149	0.477113	1.26462	1.20889	1.25423	2.55566	0.000150918	0.0025859	Up
S893	UBE2O_MOUSE	217342	Ube2o	3.14137	2.20686	2.35185	4.72196	4.33471	4.65385	1.78057	0.00309366	0.0133765	Up
S715	RHG10_MOUSE	78514	Arhgap10	1.11978	1.08979	0.623826	1.65308	1.6276	1.57409	1.71341	0.0142231	0.0382311	Up
S591	RHG10_MOUSE	78514	Arhgap10	2.05677	1.91315	1.69512	2.89729	2.79995	2.90995	1.51935	0.000897302	0.00648573	Up
S2426	CENPE_MOUSE	229841	Cenpe	0.565861	0.6789	0.582006	2.11246	1.26956	1.47647	2.65961	0.0168657	0.0431039	Up
S343	WASC2_MOUSE	28006	Washc2	0.0928268	0.139431	0.0953262	0.215783	0.318	0.390716	2.82217	0.0198104	0.0486708	Up
S198	DHX29_MOUSE	218629	Dhx29	0.541398	0.747471	0.695473	1.10854	1.12156	1.01797	1.63685	0.00382557	0.0153107	Up
S746	NUP98_MOUSE	269966	Nup98	0.109005	0.127543	0.127876	0.211985	0.190346	0.147606	1.50906	0.0360475	0.076036	Up
S235	WIPF2_MOUSE	68524	Wipf2	0.361175	0.353867	0.415089	1.29178	1.30744	1.34117	3.48667	2.65553e-06	0.000433547	Up
T696	CHD4_MOUSE	107932	Chd4	0.71072	0.788659	0.803864	1.13239	1.31399	1.40558	1.67241	0.00376207	0.0152301	Up
S800	INT6_MOUSE	18130	Ints6	1.82492	2.33032	2.09335	3.17173	3.71116	3.40573	1.64655	0.00324595	0.0138245	Up
S388	FXL19_MOUSE	233902	Fbxl19	0.762991	1.01968	0.856987	1.33533	1.23954	1.38754	1.50111	0.00702512	0.0232263	Up
S902	GAPD1_MOUSE	66691	Gapvd1	1.42693	0.59576	0.365728	4.40129	3.98346	3.3829	4.92696	0.00202529	0.0103252	Up
S344	FKB15_MOUSE	338355	Fkbp15	1.68319	1.71763	1.70297	2.63192	2.62088	2.69115	1.55648	2.46343e-06	0.000419969	Up
S568	KIF15_MOUSE	209737	Kif15	0.513775	0.19406	0.110428	1.21985	1.09439	1.27498	4.38639	0.0023235	0.0112994	Up
S414	GGA2_MOUSE	74105	Gga2	0.0848775	0.12521	0.0715691	0.268538	0.250285	0.274699	2.81734	0.000649742	0.00540689	Up
S884	SIK3_MOUSE	70661	Sik3	0.172399	0.393506	0.377673	0.498633	0.541614	0.517854	1.65127	0.0471675	0.0933587	Up
S1107	SIK3_MOUSE	70661	Sik3	0.304696	0.225607	0.279322	0.533667	0.432735	0.508101	1.82122	0.00440174	0.0168055	Up
S629	HDAC4_MOUSE	208727	Hdac4	0.629388	0.586423	0.587689	0.899587	0.879803	0.961263	1.51963	0.000383022	0.00407289	Up
S465	HDAC4_MOUSE	208727	Hdac4	1.34485	1.45281	1.22397	2.24602	2.27319	2.14822	1.65789	0.000318597	0.00373949	Up
T632	Q6NZH9_MOUSE	240168	Rasgrp3	0.801468	0.85844	0.862667	1.35707	1.62974	1.54032	1.79465	0.00127155	0.00789054	Up
S677	ZC11A_MOUSE	70579	Zc3h11a	0.232652	0.223275	0.2136	0.405124	0.348228	0.395935	1.71657	0.000979362	0.00683121	Up
S563	WDR44_MOUSE	72404	Wdr44	0.405722	0.382947	0.434763	0.767802	0.701761	0.733357	1.80061	0.000176332	0.00287584	Up
S1468	RRP5_MOUSE	18572	Pdcd11	3.77028	1.55513	1.10408	7.86222	7.4147	7.35522	3.52005	0.00299984	0.0131521	Up
S1003	RGPA1_MOUSE	56784	Ralgapa1	0.289357	0.124157	0.116687	0.454102	0.464664	0.343472	2.38068	0.0234231	0.055042	Up
S1048	CE170_MOUSE	545389	Cep170	1.54646	0.798896	0.73262	3.21951	2.89352	2.31458	2.73804	0.00865842	0.0267315	Up
S1008	CE170_MOUSE	545389	Cep170	0.732719	0.631001	0.595235	1.12129	1.22836	1.07232	1.74684	0.00139432	0.00838672	Up
T1161	FGD6_MOUSE	13998	Fgd6	0.501411	0.477864	0.470438	0.894451	0.877803	0.884776	1.8328	2.77858e-06	0.000434907	Up
S557	FGD6_MOUSE	13998	Fgd6	1.3927	1.54213	1.53033	2.33852	2.23056	2.26614	1.53079	0.000162883	0.00272411	Up
S569	PEAK1_MOUSE	244895	Peak1	6.50065	3.32769	2.15822	17.4501	16.1542	16.9399	4.21674	0.00068134	0.00550686	Up
S499	PEAK1_MOUSE	244895	Peak1	0.449526	0.547408	0.457021	0.890436	0.901582	0.827778	1.80184	0.00056684	0.00506393	Up
T385	RBL1_MOUSE	19650	Rbl1	0.945301	0.969941	0.942303	1.41829	1.54477	1.66281	1.61883	0.00115829	0.00751407	Up
T369	RBL1_MOUSE	19650	Rbl1	0.471882	0.395033	0.332025	0.719245	0.730737	0.782088	1.8617	0.00154267	0.00891915	Up
S640	RBL1_MOUSE	19650	Rbl1	0.744225	0.723452	0.591701	1.42009	1.42784	1.36874	2.04755	0.000149478	0.00257932	Up
S357	ATP7A_MOUSE	11977	Atp7a	1.12029	1.17154	1.21474	1.92093	2.082	1.95629	1.69944	0.00012788	0.00241682	Up
T269	SQSTM_MOUSE	18412	Sqstm1	17.8403	16.6067	16.8364	56.6915	54.2594	55.4137	3.24402	1.12048e-06	0.000325799	Up
T272	SQSTM_MOUSE	18412	Sqstm1	8.32087	6.92333	5.68026	34.6682	33.3999	33.57	4.85738	6.22299e-06	0.000627515	Up
S368	SQSTM_MOUSE	18412	Sqstm1	9.80146	9.36058	9.34891	29.7947	29.3999	30.8324	3.15763	1.41688e-06	0.00033502	Up
S367	SQSTM_MOUSE	18412	Sqstm1	0.837037	0.800495	0.905829	4.85684	4.80653	4.57888	5.59978	1.76609e-06	0.000352965	Up
S330	SQSTM_MOUSE	18412	Sqstm1	0.781855	0.736034	0.64941	1.44906	1.32897	1.48019	1.96476	0.000319577	0.00373949	Up
S334	SQSTM_MOUSE	18412	Sqstm1	5.00381	4.55222	4.56255	8.53948	7.33106	8.13805	1.7005	0.00102388	0.0069489	Up
S308	SQSTM_MOUSE	18412	Sqstm1	1.07592	0.997731	0.940471	4.17148	4.19038	4.18323	4.1621	1.45295e-07	0.000195815	Up
S24	SQSTM_MOUSE	18412	Sqstm1	0.294909	0.330942	0.298026	0.989645	0.923126	0.889179	3.03282	3.86728e-05	0.00151997	Up
S178	SQSTM_MOUSE	18412	Sqstm1	0.242278	0.199654	0.219621	2.54286	2.49306	2.48934	11.3751	4.41885e-08	0.000101	Up
S412	NUP62_MOUSE	18226	Nup62	1.02341	0.939255	0.849883	1.45092	1.49158	1.42318	1.55222	0.000656504	0.0054169	Up
S747	MINT_MOUSE	56381	Spen	5.02472	4.52457	5.29407	9.01129	7.05096	7.76113	1.60499	0.00827226	0.0260222	Up
S749	MINT_MOUSE	56381	Spen	5.02472	4.52457	5.29407	9.01129	7.05096	7.76113	1.60499	0.00827226	0.0260222	Up
S208	TLE4_MOUSE	21888	Tle4	0.803046	0.295404	0.192371	1.21221	1.36529	1.24479	2.96114	0.0122469	0.0341233	Up
S333	NDRG1_MOUSE	17988	Ndrg1	0.483818	0.643521	0.862774	1.15188	1.27308	1.39857	1.92126	0.00953028	0.0285594	Up
S170	TPD52_MOUSE	21985	Tpd52	10.9488	4.81643	4.91595	15.4317	17.4108	16.7803	2.39941	0.0102459	0.0299543	Up
S125	SPT6H_MOUSE	20926	Supt6h	1.12287	5.81526	3.5644	16.3889	14.8316	12.8832	4.19934	0.00270316	0.012259	Up
S387	U2AFM_MOUSE	22184	Zrsr2	0.491924	0.180935	0.131957	0.931119	0.884762	0.908347	3.38491	0.00487556	0.0180128	Up
S389	U2AFM_MOUSE	22184	Zrsr2	0.491924	0.180935	0.131957	0.931119	0.884762	0.908347	3.38491	0.00487556	0.0180128	Up
S501	TIF1B_MOUSE	21849	Trim28	0.1281	0.131125	0.168986	0.307229	0.378053	0.337767	2.38912	0.00124054	0.0077969	Up
S267	TGON1_MOUSE	22134	Tgoln1	0.533109	0.551408	0.577457	1.08554	0.945673	1.08469	1.87482	0.00055156	0.00499221	Up
S29	RBP1_MOUSE	19765	Ralbp1	0.37427	0.340296	0.386401	0.632907	0.663215	0.665019	1.78129	7.74259e-05	0.00198696	Up
S270	SIN3B_MOUSE	20467	Sin3b	0.159867	0.148767	0.122681	0.295545	0.323343	0.345547	2.23604	0.000614417	0.0052529	Up
S208	SRSF2_MOUSE	20382	Srsf2	0.606757	0.551415	0.597752	3.37639	3.34793	3.06777	5.5766	1.15245e-05	0.000850742	Up
S212	SRSF2_MOUSE	20382	Srsf2	0.606757	0.551415	0.597752	1.04322	1.10594	1.0969	1.84863	4.43786e-05	0.00161007	Up
T25	SRSF2_MOUSE	20382	Srsf2	1.18088	1.1092	1.26349	2.36687	2.65795	2.74667	2.18695	0.000334899	0.00382734	Up
S500	MCM7_MOUSE	17220	Mcm7	0.0870647	0.0689937	0.0836889	0.146106	0.118136	0.142085	1.69481	0.00581522	0.020334	Up
S933	KINH_MOUSE	16573	Kif5b	0.476175	0.604873	0.203191	1.03218	1.16839	1.00318	2.49468	0.00768722	0.024643	Up
S192	EI2BD_MOUSE	13667	Eif2b4	0.126196	0.176297	0.124361	0.451244	0.437532	0.473972	3.19254	9.98076e-05	0.00218065	Up
S269	S20A1_MOUSE	20515	Slc20a1	0.324568	0.228522	0.214424	0.512756	0.353361	0.511306	1.79465	0.0323882	0.0701471	Up
S273	S20A1_MOUSE	20515	Slc20a1	0.324568	0.228522	0.214424	0.512756	0.353361	0.511306	1.79465	0.0323882	0.0701471	Up
S189	MK06_MOUSE	50772	Mapk6	3.24637	1.7562	1.50475	5.37154	5.3033	4.94196	2.39988	0.00559414	0.0198033	Up
S168	CY24A_MOUSE	13057	Cyba	3.71988	3.51123	3.81304	5.12858	4.99655	7.00701	1.55124	0.0363455	0.0764483	Up
S619	RGL2_MOUSE	19732	Rgl2	0.340153	0.223407	0.121062	0.5666	0.504697	0.484217	2.27208	0.0129362	0.0354817	Up
S367	NAB2_MOUSE	17937	Nab2	0.423023	0.310884	0.398759	0.622859	0.656359	0.689795	1.73839	0.0020582	0.010431	Up
S14	CLN3_MOUSE	12752	Cln3	1.41559	1.60348	1.79428	2.46117	2.53092	2.40881	1.53758	0.00168511	0.00938024	Up
S609	PML_MOUSE	18854	Pml	1.04939	1.11953	1.15006	2.48026	2.42516	2.37992	2.19505	5.83753e-06	0.000621385	Up
S17	PML_MOUSE	18854	Pml	4.22453	1.51341	0.722235	13.6255	12.607	12.4297	5.9847	0.000671549	0.00548007	Up
S231	TBCD1_MOUSE	57915	Tbc1d1	1.03537	0.462763	0.350296	1.89889	1.78682	2.01156	3.08222	0.00443933	0.0168926	Up
S406	MEF2A_MOUSE	17258	Mef2a	0.9202	0.248504	0.196343	6.6958	5.46394	4.32281	12.0747	0.00223657	0.0110332	Up
S304	CAPR1_MOUSE	53872	Caprin1	2.61265	2.61078	2.45548	3.83354	4.117	4.05971	1.56406	0.000139105	0.00250706	Up
S833	RASA3_MOUSE	19414	Rasa3	1.23967	0.534608	0.315232	3.12668	2.65142	2.88459	4.14579	0.00213459	0.0107073	Up
S571	TNAP3_MOUSE	21929	Tnfaip3	0.360089	0.390647	0.401756	0.657283	0.806278	0.795	1.95972	0.00173425	0.0095101	Up
S550	TNAP3_MOUSE	21929	Tnfaip3	0.371273	0.380702	0.402949	0.763036	0.769175	0.791506	2.01201	6.87023e-06	0.000682741	Up
T634	SAMH1_MOUSE	56045	Samhd1	0.537807	0.514795	0.535979	1.15412	1.10948	1.23508	2.20239	7.05055e-05	0.00195421	Up
T87	HNRPD_MOUSE	11991	Hnrnpd	1.30966	1.47964	1.29642	6.25265	6.08285	5.35951	4.33094	8.50551e-05	0.00203214	Up
S83	HNRPD_MOUSE	11991	Hnrnpd	0.566417	1.70772	1.58934	8.19166	11.6084	11.0482	7.98459	0.00129695	0.00797669	Up
S278	LEO1_MOUSE	235497	Leo1	0.234178	0.189593	0.158627	0.408684	0.366558	0.314478	1.87109	0.00842872	0.0263546	Up
S280	LEO1_MOUSE	235497	Leo1	0.234178	0.189593	0.158627	0.408684	0.366558	0.314478	1.87109	0.00842872	0.0263546	Up
S395	ACBD5_MOUSE	74159	Acbd5	0.114719	0.170163	0.141162	0.549434	0.472753	0.425546	3.39808	0.000993974	0.00686479	Up
S182	ZN496_MOUSE	268417	Znf496	0.214319	0.171163	0.246005	0.257154	0.349342	0.360864	1.53188	0.0465832	0.0924519	Up
S79	ACACA_MOUSE	107476	Acaca	3.19755	3.24037	2.92743	5.95075	5.76142	5.76449	1.8661	2.02586e-05	0.00114804	Up
S52	KAT7_MOUSE	217127	Kat7	1.47528	1.14122	1.11564	2.34701	2.13907	2.14347	1.77634	0.00199972	0.0102514	Up
S164	IF2B2_MOUSE	319765	Igf2bp2	0.55945	0.512505	0.375939	0.930767	0.822726	0.816639	1.77508	0.00487408	0.0180128	Up
S910	LRRK2_MOUSE	66725	Lrrk2	1.02803	0.684806	0.806877	2.1893	2.33005	2.05143	2.60775	0.000466193	0.00455368	Up
S683	TAF3_MOUSE	209361	Taf3	0.109951	0.103232	0.0660779	0.203825	0.267632	0.262767	2.62917	0.00353054	0.0145224	Up
T212	Q5FWX7_MOUSE	100273	Osbpl9	0.92746	0.989164	0.967622	1.48974	1.58445	1.4403	1.56522	0.000293693	0.00362204	Up
S965	TAOK1_MOUSE	216965	Taok1	0.148608	0.0957933	0.087113	0.225604	0.221805	0.273807	2.17552	0.00699414	0.0231654	Up
S421	TAOK1_MOUSE	216965	Taok1	0.283103	0.173314	0.12556	1.72576	1.50319	1.32088	7.81789	0.00046591	0.00455368	Up
S1082	TASO2_MOUSE	105203	Tasor2	0.560836	0.613336	0.520181	1.47091	1.44955	1.1618	2.40933	0.00152365	0.00882402	Up
S389	TAB3_MOUSE	66724	Tab3	0.0917169	0.249843	0.256963	0.358431	0.540448	0.587131	2.4828	0.0284443	0.0637602	Up
S103	TAB3_MOUSE	66724	Tab3	3.88809	2.59891	2.58199	5.21486	4.94926	5.96249	1.77822	0.0112221	0.0320106	Up
S671	PRAG1_MOUSE	244418	Prag1	0.168354	0.208308	0.239874	0.448657	0.532618	0.433581	2.29485	0.00200316	0.0102516	Up
S243	TR150_MOUSE	230753	Thrap3	6.19134	5.44027	4.42405	12.857	13.8145	14.0257	2.53476	0.00019447	0.00303064	Up
S238	TR150_MOUSE	230753	Thrap3	4.57278	3.0432	3.83783	8.85549	9.199	9.19856	2.37939	0.000321713	0.00374976	Up
S358	CCNL1_MOUSE	56706	Ccnl1	10.282	6.89588	6.20961	12.3374	11.5286	11.6785	1.51981	0.0342356	0.0731775	Up
S620	PHAR4_MOUSE	100169	Phactr4	0.318125	0.287412	0.23281	0.564477	0.528229	0.629707	2.05453	0.0016091	0.00914894	Up
S1158	PKHG3_MOUSE	263406	Plekhg3	0.0612141	0.0699184	0.0836757	0.146758	0.111892	0.128698	1.80323	0.00870441	0.0268132	Up
S402	Q3ZB59_MOUSE	14389	Gab2	0.722209	0.336402	0.224408	1.20323	1.31431	1.30223	2.97717	0.00546482	0.0195677	Up
S455	Q3V117_MOUSE	104112	Acly	21.8288	20.699	22.5855	31.0492	32.7875	34.3989	1.50869	0.00057721	0.00512513	Up
S345	Q3UZ64_MOUSE	18021	Nfatc3	0.4182	0.240695	0.223869	0.500417	0.600804	0.527535	1.84506	0.0226972	0.0536907	Up
S634	KDM7A_MOUSE	338523	Kdm7a	1.47351	1.2714	1.23178	4.1022	3.20791	4.34936	2.93195	0.00195165	0.0101503	Up
S434	Q3UWE6_MOUSE	69641	Wdr20	0.91257	0.417254	0.202978	2.9558	2.96496	2.72092	5.63783	0.00045809	0.0045089	Up
S181	Q3UR91_MOUSE	80913	Pum2	5.48319	4.10428	3.29271	11.0988	10.3999	10.5268	2.48642	0.000696209	0.00555105	Up
S24	PP1R7_MOUSE	66385	Ppp1r7	1.08596	1.11997	1.2345	2.08651	1.93484	1.83543	1.70234	0.000714888	0.00564685	Up
S27	PP1R7_MOUSE	66385	Ppp1r7	1.08596	1.24582	1.33608	2.16402	2.06477	1.93255	1.67982	0.00111048	0.00732873	Up
S45	PP1R7_MOUSE	66385	Ppp1r7	0.702939	0.707337	0.685898	1.04217	1.48095	1.22318	1.7872	0.0124985	0.0345852	Up
S516	Q3UKR0_MOUSE	13163	Daxx	0.872419	0.443276	0.27793	1.66692	1.5395	1.52695	2.97019	0.00459889	0.0173172	Up
T524	Q3UKR0_MOUSE	13163	Daxx	0.872419	0.443276	0.27793	2.57642	2.29343	2.13654	4.39651	0.00118322	0.00760073	Up
S693	TAXB1_MOUSE	52440	Tax1bp1	0.265401	0.260173	0.235935	0.624009	0.665434	0.687433	2.596	4.01216e-05	0.00151997	Up
S635	AAK1_MOUSE	269774	Aak1	2.2351	2.1023	2.27585	5.23065	5.24136	4.73409	2.29934	8.22035e-05	0.00201764	Up
S297	Q3UHC1_MOUSE	107746	Rapgef1	0.598902	0.557336	0.617508	1.01997	1.09118	1.04441	1.77904	7.37837e-05	0.00195421	Up
S265	Q3UHC1_MOUSE	107746	Rapgef1	0.6844	0.603339	0.610381	0.960231	0.950695	0.967083	1.51624	0.000243772	0.00338295	Up
S92	A7L3B_MOUSE	382423	Atxn7l3b	1.45258	1.42277	1.34964	2.29171	2.43152	2.26382	1.65374	0.000106773	0.00222043	Up
S419	FOXK2_MOUSE	68837	Foxk2	2.10674	1.95481	1.86981	3.07547	3.06409	2.96414	1.53484	0.000169651	0.00280312	Up
S345	GP183_MOUSE	321019	Gpr183	0.175241	0.175665	0.178433	0.334287	0.352856	0.378442	2.01305	0.000154349	0.00262624	Up
S324	GP183_MOUSE	321019	Gpr183	0.974521	1.0557	0.902808	2.65522	2.15668	2.22975	2.40081	0.00106231	0.00710657	Up
S268	F117B_MOUSE	72750	Fam117b	0.655138	0.527436	0.443072	0.842509	0.967995	0.814267	1.6146	0.0127646	0.0351654	Up
S76	Q3U2G2_MOUSE	15525	Hspa4	0.464626	0.469038	0.534388	0.958137	0.961549	1.02319	2.00461	9.13676e-05	0.00211851	Up
S38	GPSM3_MOUSE	106512	Gpsm3	2.45589	1.56413	0.756541	4.98559	4.21994	4.04166	2.77338	0.00773202	0.0247518	Up
S254	Q3U1U6_MOUSE	78829; 122152371	Tsc22d4	0.698096	0.994174	0.408865	1.15517	1.31018	1.26689	1.7763	0.0360831	0.076036	Up
S303	SRSF6_MOUSE	67996	Srsf6	4.5515	1.9137	1.2073	28.4257	22.0207	19.7154	9.14458	0.00173731	0.0095101	Up
S385	ALKB5_MOUSE	268420	Alkbh5	4.47465	1.75321	1.22594	5.66014	6.52394	6.07143	2.44915	0.0255385	0.0586265	Up
S253	ALKB5_MOUSE	268420	Alkbh5	0.0966997	0.147466	0.120591	0.360698	0.357636	0.364537	2.96874	8.54643e-05	0.00203482	Up
S15	TLS1_MOUSE	227707	BC005624	2.11372	2.53334	2.1653	10.8674	9.51635	10.6332	4.55303	5.07651e-05	0.00174397	Up
S17	TLS1_MOUSE	227707	BC005624	2.11372	2.46042	2.07115	10.1839	9.03026	10.0415	4.40246	3.95366e-05	0.00151997	Up
S261	TLS1_MOUSE	227707	BC005624	0.424752	3.19963	1.2988	50.5928	42.1559	38.6862	26.6971	0.000313442	0.00373514	Up
S511	DTL_MOUSE	76843	Dtl	0.16403	0.120512	0.135857	0.252899	0.322793	0.273556	2.0201	0.00419522	0.0162154	Up
S489	DTL_MOUSE	76843	Dtl	0.111625	0.163217	0.170684	0.410599	0.491107	0.498039	3.14178	0.000698581	0.00555366	Up
S1349	SMCA4_MOUSE	20586	Smarca4	3.43443	2.82022	2.86102	5.69239	5.89092	5.36625	1.85939	0.000477774	0.00461296	Up
S504	TTYH2_MOUSE	117160	Ttyh2	0.561762	0.697715	0.662916	0.910471	0.901108	1.18203	1.55723	0.0239175	0.0558592	Up
S106	Q3TFP0_MOUSE	14105	Srsf10	1.11447	0.881193	0.904115	1.53301	1.46128	1.37199	1.50573	0.00506366	0.0185182	Up
S972	CO039_MOUSE	74211	1700017B05Rik	0.46689	0.610716	0.490097	1.23676	1.16277	1.03229	2.18907	0.00113329	0.007408	Up
S912	CO039_MOUSE	74211	1700017B05Rik	1.49376	1.32258	1.45587	2.12652	2.18652	2.29615	1.54702	0.000410436	0.00420682	Up
S579	CO039_MOUSE	74211	1700017B05Rik	0.749134	0.806274	0.945734	1.48167	1.32222	1.24045	1.617	0.00497944	0.0182784	Up
S375	ABRX2_MOUSE	109359	Abraxas2	0.271812	0.100518	0.0809837	0.636075	0.572824	0.483145	3.73262	0.0053393	0.0192389	Up
S573	Q1MX42_MOUSE	18753	Prkcd	0.34445	0.37835	0.353991	3.13933	2.86571	3.06594	8.42408	5.4481e-06	0.000592978	Up
S433	Q0VGT3_MOUSE	229584	Pogz	0.244301	0.235542	0.0865168	0.519872	0.464316	0.551505	2.71151	0.00483422	0.0179247	Up
S655	RBM15_MOUSE	229700	Rbm15	0.0886002	0.935406	0.273993	1.76635	1.43573	1.49708	3.62031	0.0148204	0.0392087	Up
S414	MITF_MOUSE	17342	Mitf	1.00291	1.12288	1.10988	1.59802	1.58376	1.69793	1.5081	0.000468744	0.00457209	Up
S2471	MPRI_MOUSE	16004	Igf2r	0.860897	0.773436	0.676837	1.47132	1.49869	1.56066	1.96033	0.000238371	0.00334944	Up
T2352	MPRI_MOUSE	16004	Igf2r	0.560299	0.417523	0.437837	0.772972	0.748601	0.746798	1.60234	0.00331627	0.0139568	Up
S51	GCH1_MOUSE	14528	Gch1	1.34908	0.676501	0.708934	2.54399	2.99432	3.04236	3.13791	0.00196679	0.0101898	Up
S754	ADAM8_MOUSE	11501	Adam8	0.148593	0.0831455	0.129417	0.481481	0.495875	0.535236	4.1882	0.000108512	0.00223456	Up
S226	HNRL2_MOUSE	68693	Hnrnpul2	0.319574	0.684944	0.437647	0.780502	0.862493	0.888358	1.75524	0.0320177	0.0697194	Up
S159	HNRL2_MOUSE	68693	Hnrnpul2	1.02298	1.70454	1.3811	2.33656	2.27121	2.44031	1.71544	0.008467	0.0264382	Up
S1028	ITA4_MOUSE	16401	Itga4	2.94966	2.44121	2.39099	4.5736	4.71866	4.37442	1.75623	0.000659497	0.0054169	Up
T221	DAB2_MOUSE	13132	Dab2	0.224024	0.200385	0.218935	0.440622	0.441851	0.412051	2.01218	5.67302e-05	0.00177625	Up
S227	DAB2_MOUSE	13132	Dab2	0.224024	0.200385	0.218935	0.440622	0.441851	0.412051	2.01218	5.67302e-05	0.00177625	Up
S401	DAB2_MOUSE	13132	Dab2	5.53519	5.59321	5.57482	8.83442	8.8187	8.97377	1.59412	3.70522e-07	0.000232482	Up
S32	DAB2_MOUSE	13132	Dab2	0.204827	0.129356	0.122578	0.523158	0.59701	0.554042	3.66539	0.000281049	0.0035871	Up
T148	JDP2_MOUSE	81703	Jdp2	0.676744	0.782748	0.603439	1.50248	1.187	1.29914	1.93347	0.0037521	0.0152237	Up
S145	JDP2_MOUSE	81703	Jdp2	0.224149	0.233953	0.170991	0.409903	0.352061	0.343976	1.75799	0.00508109	0.0185621	Up
S862	RBBP6_MOUSE	19647	Rbbp6	0.843765	0.716949	0.89396	2.56816	2.5527	2.55079	3.12532	5.12811e-06	0.000574305	Up
S327	SMRC1_MOUSE	20588	Smarcc1	36.8014	25.7207	17.6788	87.8001	77.1545	73.5831	2.97425	0.00165501	0.00927156	Up
S329	SMRC1_MOUSE	20588	Smarcc1	31.3127	22.938	16.4493	48.4018	47.4392	46.2666	2.01001	0.00541094	0.0194357	Up
S309	SMRC1_MOUSE	20588	Smarcc1	0.0868339	0.435902	0.0628915	0.662772	0.836843	0.787943	3.90617	0.0124133	0.0344381	Up
S1194	RHG05_MOUSE	11855	Arhgap5	0.362407	0.429144	0.42554	0.816121	0.738695	0.690479	1.8448	0.00128756	0.00796105	Up
T31	ETV6_MOUSE	14011	Etv6	4.16165	3.32506	3.32367	7.69991	7.78863	7.5401	2.13023	0.000145973	0.00255341	Up
T144	MCL1_MOUSE	17210	Mcl1	1.43563	1.28046	1.65137	2.78359	2.77052	2.71295	1.89288	0.000290583	0.00360791	Up
S5	SRSF3_MOUSE	20383	Srsf3	2.05979	0.758244	0.44228	3.3535	3.36503	3.32625	3.08092	0.0102798	0.0300334	Up
S2027	WNK1_MOUSE	232341	Wnk1	11.86	6.01936	4.15701	17.0182	15.6534	16.0961	2.21305	0.0193745	0.0478799	Up
S2367	WNK1_MOUSE	232341	Wnk1	0.939097	0.903195	0.79811	1.94891	2.00219	1.88563	2.21055	3.91406e-05	0.00151997	Up
S165	WNK1_MOUSE	232341	Wnk1	1.56734	1.7294	1.61191	2.54327	2.52887	2.51867	1.54642	5.24648e-05	0.00175488	Up
S1292	WNK1_MOUSE	232341	Wnk1	3.27394	2.94128	2.5221	4.56042	4.47568	4.36995	1.53434	0.00226924	0.0111303	Up
S252	TCPG_MOUSE	12462	Cct3	0.699435	0.494907	0.620234	1.14493	1.0335	0.996174	1.7495	0.00367639	0.0149672	Up
S327	ERF_MOUSE	13875	Erf	0.307427	0.289416	0.204523	0.645612	0.641444	0.672964	2.44585	0.000313289	0.00373514	Up
S36	STX4_MOUSE	20909	Stx4	0.142141	0.125853	0.109325	0.222352	0.280549	0.230362	1.94335	0.00445077	0.0169174	Up
S208	FGF13_MOUSE	14168	Fgf13	0.704461	0.670469	0.77133	1.34095	1.03238	1.46734	1.78947	0.0130378	0.0357171	Up
S19	EM55_MOUSE	17524	Mpp1	0.351924	0.331852	0.286708	0.566296	0.534021	0.482245	1.63069	0.00281384	0.0126026	Up
S60	KIFA3_MOUSE	16579	Kifap3	0.441571	0.405156	0.428381	0.770934	0.672865	0.670293	1.65797	0.00130059	0.0079912	Up
S398	RANB9_MOUSE	56705	Ranbp9	0.511718	0.83554	0.30769	1.33192	1.38155	1.36263	2.46297	0.00639067	0.0217471	Up
S113	RS17_MOUSE	20068	Rps17	5.23467	5.20953	4.69825	8.16793	7.31134	7.46954	1.51553	0.00118452	0.00760073	Up
S48	VAMP3_MOUSE	22319	Vamp3	1.31316	1.03338	1.0303	1.91468	1.84858	1.84106	1.65963	0.00154411	0.00891996	Up
S207	YBOX1_MOUSE	22608	Ybx1	1.80245	1.91496	1.96499	3.91202	3.8891	4.2755	2.12527	9.1496e-05	0.00211851	Up
S48	H4_MOUSE	319156; 320332; 326619; 97122; 319158; 326620; 100041230; 319155; 319157; 69386; 319159; 319161; 319160	H4c11; H4c4; H4c2; H4c8; H4c6; H4c1; H4c14; Hist1h4m; H4c12; H4f16; H4c3; H4c9	1.06615	1.22901	1.13114	1.76356	1.72386	1.76027	1.53159	0.000244059	0.00338295	Up
T316	PP1B_MOUSE	19046	Ppp1cb	3.08013	2.7293	3.10648	4.68067	4.91499	4.5008	1.58105	0.000538125	0.00490029	Up
T320	PP1A_MOUSE	19045	Ppp1ca	1.69578	1.82142	1.79517	2.77723	2.78183	2.52129	1.52104	0.000609199	0.00523059	Up
S147	ARF3_MOUSE	11842	Arf3	0.260035	0.209556	0.200753	0.371776	0.361222	0.336736	1.5958	0.00327504	0.0138723	Up
S233	ACTB_MOUSE	11461	Actb	0.211833	0.254358	0.148159	0.409822	0.344104	0.297435	1.71134	0.0315188	0.0688514	Up
S692	KDM2A_MOUSE	225876	Kdm2a	0.487703	0.548342	0.588863	1.06581	1.00316	1.03261	1.90877	0.000140488	0.00250866	Up
S400	SASH1_MOUSE	70097	Sash1	0.338182	0.323437	0.340896	1.00483	0.852798	0.915563	2.76623	0.000185789	0.00295581	Up
S367	SASH1_MOUSE	70097	Sash1	0.172541	0.150535	0.170856	0.39229	0.459909	0.37234	2.47916	0.000888503	0.00644705	Up
S1022	TB182_MOUSE	228140	Tnks1bp1	0.421799	0.434175	0.341778	0.647579	0.715371	0.677691	1.70373	0.00130288	0.00799805	Up
S412	RIPK2_MOUSE	192656	Ripk2	0.365777	0.381903	0.373187	0.607587	0.618186	0.761234	1.77274	0.00438965	0.0167874	Up
T435	EF2_MOUSE	13629	Eef2	1.29325	0.908778	0.770091	2.23817	1.77982	1.67279	1.91472	0.017842	0.0449894	Up
S48	NADK_MOUSE	192185	Nadk	0.922507	0.84879	0.520143	1.38341	1.22659	1.49198	1.79013	0.0143538	0.0384718	Up
S469	MOT4_MOUSE	80879	Slc16a3	0.64183	0.705191	0.621954	1.13564	1.1906	1.12892	1.7548	9.92023e-05	0.00218023	Up
S430	MOT4_MOUSE	80879	Slc16a3	6.95773	7.02253	7.03197	20.1694	20.5062	21.2358	2.94645	1.71689e-06	0.000352965	Up
S589	3BP1_MOUSE	20401	Sh3bp1	0.352252	0.34014	0.407203	0.714973	0.767006	0.701673	1.98587	0.000228747	0.00326774	Up
S210	MOT1_MOUSE	20501	Slc16a1	2.8773	3.36689	2.70886	7.41208	7.57832	7.31401	2.49126	3.03726e-05	0.00137924	Up
S213	MOT1_MOUSE	20501	Slc16a1	3.72003	5.39251	3.74115	11.0002	12.4109	11.5575	2.72051	0.000433232	0.00436864	Up
S230	MOT1_MOUSE	20501	Slc16a1	0.776997	0.489509	0.456442	0.815872	1.03758	0.984485	1.64714	0.0379474	0.0788526	Up
S100	HMGA2_MOUSE	15364	Hmga2	0.593023	6.46381	8.21811	33.6776	27.3978	29.0173	5.89807	0.00110979	0.00732873	Up
S104	HMGA2_MOUSE	15364	Hmga2	1.19473	11.5776	14.8679	42.1944	34.49	37.5769	4.13388	0.00353008	0.0145224	Up
Y175	KPYM_MOUSE	18746	Pkm	0.0751554	0.0967167	0.0761707	0.143188	0.157973	0.136988	1.76642	0.00250855	0.0118192	Up
S37	KPYM_MOUSE	18746	Pkm	0.0722906	0.0702278	0.0618225	0.160075	0.111569	0.151778	2.07214	0.00885513	0.027192	Up
S165	HDGF_MOUSE	15191	Hdgf	11.1964	12.0367	4.02987	70.3386	49.1214	42.3291	5.93438	0.00703119	0.0232351	Up
S72	RAB7A_MOUSE	19349	Rab7a	0.256465	0.316843	0.280252	1.36329	1.39056	1.46615	4.944	5.92e-06	0.000621385	Up
S315	PCY1A_MOUSE	13026	Pcyt1a	0.937225	0.800877	0.710104	2.56025	2.53672	3.04359	3.32511	0.000437412	0.00439785	Up
S6	ROA1_MOUSE	15382	Hnrnpa1	2.64359	2.91668	0.594127	9.11516	6.60841	6.23155	3.56739	0.0106357	0.0308628	Up
T19	LMNA_MOUSE	16905	Lmna	0.301496	0.217142	0.16323	0.666858	0.613337	0.529232	2.65363	0.00269981	0.012259	Up
S22	LMNA_MOUSE	16905	Lmna	6.15129	1.90162	0.8604	43.7372	40.3529	35.6048	13.4288	0.000207628	0.00311552	Up
T548	LMNA_MOUSE	16905	Lmna	0.483662	0.606735	1.29909	1.50349	1.60221	1.63764	1.98509	0.0378948	0.0787886	Up
S546	LMNA_MOUSE	16905	Lmna	1.97461	1.96092	2.08193	4.33879	3.88114	4.12157	2.05095	0.000105883	0.00221561	Up
S308	FOSL2_MOUSE	14284	Fosl2	0.126802	0.132336	0.107636	0.242237	0.259527	0.247185	2.04199	0.000149711	0.00257932	Up
S200	FOSL2_MOUSE	14284	Fosl2	30.6676	28.0327	29.0902	54.3676	56.4021	56.4071	1.90427	1.32828e-05	0.000882057	Up
S31	IEX1_MOUSE	15937	Ier3	0.240195	0.215841	0.114933	0.566459	0.464949	0.497729	2.67815	0.00278098	0.0124962	Up
S18	IEX1_MOUSE	15937	Ier3	0.820055	0.799285	0.816465	2.37807	2.57062	2.54739	3.07746	1.01895e-05	0.000812444	Up
S11	DCK_MOUSE	13178	Dck	7.22234	4.06866	1.95911	12.4362	12.4215	12.7376	2.83736	0.00611027	0.0210543	Up
S229	FOXK1_MOUSE	17425	Foxk1	2.19406	2.08479	3.35032	3.96041	4.08888	4.1189	1.59495	0.0206459	0.0502694	Up
S897	KDM5C_MOUSE	20591	Kdm5c	0.426465	0.364135	0.294089	0.683912	0.671356	0.611561	1.81326	0.00266756	0.0121781	Up
S428	BCL6_MOUSE	12053	Bcl6	0.198465	0.160911	0.173711	0.385144	0.363637	0.353993	2.06865	0.000189042	0.00298677	Up
S405	BCL6_MOUSE	12053	Bcl6	2.20356	2.00992	2.34251	3.52088	3.70076	3.51734	1.63804	0.000255502	0.00343581	Up
S101	HEM6_MOUSE	12892	Cpox	1.83679	0.632756	0.380192	10.9279	8.97997	8.12275	9.83621	0.000883279	0.00642274	Up
S670	PTN12_MOUSE	19248	Ptpn12	0.0888128	0.107509	0.110407	0.165482	0.150323	0.16797	1.57721	0.00249694	0.0117991	Up
S748	PTN12_MOUSE	19248	Ptpn12	0.360902	0.218781	0.330126	1.22588	1.23831	1.31982	4.15913	5.20952e-05	0.00175106	Up
S448	PTN12_MOUSE	19248	Ptpn12	0.192761	0.157034	0.148827	0.256355	0.265503	0.247749	1.54347	0.00332049	0.0139568	Up
S553	CALX_MOUSE	12330	Canx	17.5221	16.9351	16.9729	87.7206	69.2789	68.3627	4.38191	0.000778488	0.00597102	Up
S563	CALX_MOUSE	12330	Canx	18.3075	18.6636	17.7565	45.5106	35.9332	32.9896	2.09097	0.0062863	0.021456	Up
S232	ODPA_MOUSE	18597	Pdha1	0.506993	0.199	0.151719	2.16155	1.63624	1.49943	6.17599	0.00302574	0.013215	Up
S1139	NKTR_MOUSE	18087	Nktr	0.945418	0.633503	0.487889	1.33428	1.23104	1.21339	1.82828	0.0151931	0.0399305	Up
S22	MRP_MOUSE	17357	Marcksl1	11.9938	8.5428	9.10926	14.4742	14.7458	15.3281	1.50268	0.0106182	0.0308585	Up
S39	FLI1_MOUSE	14247	Fli1	1.97564	0.960329	0.658499	3.09033	3.35704	3.1517	2.67051	0.00790541	0.0251624	Up
S672	MCM3_MOUSE	17215	Mcm3	59.0929	46.5523	45.4952	77.6757	80.6319	76.6658	1.55467	0.00349587	0.0144231	Up
S668	MCM3_MOUSE	17215	Mcm3	14.0734	11.226	11.3387	30.6856	29.8775	28.5346	2.43182	9.91589e-05	0.00218023	Up
T584	CD11B_MOUSE	12537	Cdk11b	1.77596	1.71905	1.44965	2.68805	2.51726	2.3719	1.5324	0.00296358	0.0130539	Up
S47	CD11B_MOUSE	12537	Cdk11b	1.0878	0.465475	0.968039	2.49067	2.4147	2.21722	2.82495	0.00178092	0.00966886	Up
S234	CD11B_MOUSE	12537	Cdk11b	2.0633	3.24135	3.8575	9.0612	8.54754	8.73025	2.87476	0.000472088	0.00459777	Up
S416	TISD_MOUSE	12193	Zfp36l2	2.39492	2.18946	2.09929	4.01524	4.1974	4.1364	1.84764	5.11786e-05	0.00174397	Up
S161	MDM2_MOUSE	17246	Mdm2	0.34117	0.375965	0.619107	2.65408	2.78426	2.72851	6.1118	1.81346e-05	0.0010538	Up
S675	KPCL_MOUSE	18755	Prkch	0.252562	0.302166	0.295146	0.478328	0.515111	0.539174	1.80334	0.000638382	0.00535497	Up
S28	KPCL_MOUSE	18755	Prkch	0.08808	0.0887816	0.0857129	0.149822	0.148939	0.128974	1.62901	0.00131528	0.00803823	Up
S667	CBL_MOUSE	12402	Cbl	0.342488	0.459519	0.38221	1.05732	1.09276	1.03299	2.68791	6.53832e-05	0.00192417	Up
S47	VIME_MOUSE	22352	Vim	2.81675	2.7975	2.83187	6.47734	6.5525	6.72846	2.33933	9.40388e-07	0.000322412	Up
S430	VIME_MOUSE	22352	Vim	0.671173	0.532412	0.60937	3.75885	3.73209	3.7569	6.20415	1.73966e-07	0.000195815	Up
S420	VIME_MOUSE	22352	Vim	1.30728	1.21958	0.974243	3.35151	3.63747	2.85037	2.81036	0.00108547	0.00722627	Up
S325	VIME_MOUSE	22352	Vim	0.156095	0.265989	0.192608	0.32143	0.333398	0.300583	1.55429	0.0280556	0.0630963	Up
Y44	ENOA_MOUSE	433182; 13806	Eno1	0.352252	0.34014	0.407203	0.714973	0.767006	0.701673	1.98587	0.000228747	0.00326774	Up
S253	JUND_MOUSE	16478	Jund	1.51717	1.3391	1.42416	2.44471	2.45377	2.33068	1.68889	0.00011085	0.00224641	Up
S249	JUND_MOUSE	16478	Jund	1.8765	1.42172	1.93248	2.81161	3.04667	2.83832	1.66261	0.00290491	0.0129093	Up
S297	ETS2_MOUSE	23872	Ets2	0.193721	0.172308	0.144713	0.345882	0.343312	0.350912	2.03646	0.00025191	0.00342947	Up
S229	HMOX1_MOUSE	15368	Hmox1	0.42479	0.406412	0.404835	0.892267	0.985852	0.99639	2.32558	8.48672e-05	0.00203214	Up
S8	HMOX1_MOUSE	15368	Hmox1	0.0681678	0.0693622	0.0986506	0.167567	0.131398	0.153889	1.9174	0.00760995	0.0244753	Up
S13	FGR_MOUSE	14191	Fgr	0.337945	0.237307	0.213655	1.38482	1.27668	1.21847	4.91816	7.61419e-05	0.00198696	Up
T814	RB_MOUSE	19645	Rb1	1.58488	1.80061	1.79175	2.7776	3.41917	2.7578	1.7296	0.00528215	0.0190931	Up
T384	GELS_MOUSE	227753	Gsn	0.417886	0.359688	0.400232	0.617824	0.692827	0.651285	1.66576	0.000703536	0.00557061	Up
S359	ATX1L_MOUSE	52335	Atxn1l	3.28332	2.41393	2.27343	4.00526	4.76434	4.70376	1.69036	0.0100387	0.029594	Up
S248	JUNB_MOUSE	16477	Junb	1.38475	1.67652	1.74759	4.52566	4.50574	4.11982	2.73479	8.66969e-05	0.00205703	Up
T252	JUNB_MOUSE	16477	Junb	4.68119	3.90893	4.08644	10.3099	9.34249	8.75985	2.24132	0.000499422	0.00470403	Up
S256	JUNB_MOUSE	16477	Junb	5.80806	4.94392	5.31159	12.386	11.4556	10.9252	2.16433	0.000228664	0.00326774	Up
S577	NUCL_MOUSE	17975	Ncl	0.255911	0.263428	0.321285	0.490361	0.476606	0.506049	1.75229	0.000702844	0.00557061	Up
S403	NUCL_MOUSE	17975	Ncl	2.77496	2.74892	2.78557	4.65817	4.40123	4.30917	1.60884	8.78763e-05	0.00207633	Up
S231	HS90A_MOUSE	15519	Hsp90aa1	0.00727827	10.9792	3.02477	14.8106	13.6964	18.16	3.33068	0.0370103	0.0774427	Up
S73	JUN_MOUSE	16476	Jun	0.975204	0.40004	0.19554	10.2412	9.60998	8.28938	17.915	0.000140033	0.00250706	Up
S63	JUN_MOUSE	16476	Jun	0.738341	0.706486	0.73529	1.85278	2.02881	1.93067	2.66603	2.00601e-05	0.00114627	Up
S246	JUN_MOUSE	16476	Jun	0.39005	0.334291	0.375177	1.08027	1.11397	0.719987	2.65046	0.00893052	0.0273744	Up
S17	SRC_MOUSE	20779	Src	0.531399	0.764464	0.421325	1.46336	1.60769	1.88718	2.88741	0.00252824	0.0118557	Up
S9	HG2A_MOUSE	16149	Cd74	0.403716	0.328842	0.283012	0.668023	0.687617	0.648274	1.97319	0.000876289	0.00639225	Up
S64	MYC_MOUSE	17869	Myc	0.305556	0.387922	0.361483	0.54208	0.600327	0.652141	1.70106	0.00351845	0.0144988	Up
S786	PDE4A_MOUSE	18577	Pde4a	0.611977	0.616461	0.60379	1.0998	1.08076	1.0073	1.73988	9.17599e-05	0.00211851	Up
T1365	CBPD_MOUSE	12874	Cpd	1.31327	1.45291	1.42617	2.83955	2.63718	2.8516	1.98655	7.21623e-05	0.00195421	Up
T1367	CBPD_MOUSE	12874	Cpd	0.746967	0.842081	0.802067	1.76211	1.66406	1.604	2.10369	8.12766e-05	0.00201764	Up
S279	BRD7_MOUSE	26992	Brd7	0.172005	0.199282	0.170837	0.741434	0.723	0.674495	3.94546	1.7376e-05	0.00103606	Up
S1054	ZFR_MOUSE	22763	Zfr	10.1504	5.14846	5.09442	18.2289	14.9925	15.1445	2.37166	0.00925171	0.027996	Up
S1865	TM131_MOUSE	56030	Tmem131	0.689586	0.726203	0.808844	1.76483	1.6796	1.74778	2.33396	2.28473e-05	0.00120511	Up
S116	E41L2_MOUSE	13822	Epb41l2	0.21526	0.381928	0.248195	1.35489	0.79345	0.939235	3.65228	0.0131305	0.0359281	Up
S18	NINJ1_MOUSE	18081	Ninj1	0.539127	0.437907	0.437878	0.777638	0.577328	0.821208	1.53803	0.0368488	0.0772037	Up
S669	SPT5H_MOUSE	20924	Supt5h	0.659262	0.667905	0.701801	1.00821	1.20515	1.13006	1.64784	0.00173654	0.0095101	Up
S189	SLK_MOUSE	20874	Slk	2.60576	2.13303	2.05061	3.43629	3.46006	3.57856	1.54283	0.00233402	0.0113105	Up
S314	DFFA_MOUSE	13347	Dffa	5.22781	1.82206	1.54454	11.6736	11.4157	11.5973	4.03595	0.00184447	0.0098348	Up
S229	PSB10_MOUSE	19171	Psmb10	0.286167	0.251843	0.264417	0.402322	0.452547	0.502485	1.69156	0.00377926	0.0152524	Up
S621	PITM1_MOUSE	18739	Pitpnm1	4.16926	2.32697	1.97518	6.93921	6.3619	6.389	2.3243	0.0060961	0.0210267	Up
S77	AXIN1_MOUSE	12005	Axin1	0.122762	0.0674727	0.0741488	0.172332	0.209712	0.204452	2.21835	0.00689452	0.0229717	Up
S89	FYB1_MOUSE	23880	Fyb1	2.68441	2.23418	2.41085	3.35597	4.04844	3.66243	1.50992	0.00649417	0.0219904	Up
S114	FYB1_MOUSE	23880	Fyb1	7.696	7.61913	8.41078	12.207	12.211	12.4611	1.55438	7.89714e-05	0.00198696	Up
S407	RABE1_MOUSE	54189	Rabep1	4.77952	3.90995	3.09872	6.80314	6.44595	6.77383	1.69856	0.00531085	0.0191565	Up
T1809	NOTC2_MOUSE	18129	Notch2	0.116698	0.124886	0.121667	0.178553	0.191465	0.184002	1.52517	0.00013759	0.00250706	Up
S95	CDK14_MOUSE	18647	Cdk14	2.06995	1.30973	1.48445	3.49033	3.35317	3.93744	2.21642	0.00243464	0.01162	Up
S339	CLK4_MOUSE	12750	Clk4	0.651052	0.717426	0.753748	1.27738	1.13853	1.1892	1.69874	0.000610248	0.00523059	Up
S316	PURB_MOUSE	19291	Purb	0.474394	0.910767	0.693097	2.12839	1.99653	1.98476	2.93981	0.000557785	0.00502592	Up
S383	BHE40_MOUSE	20893	Bhlhe40	0.655355	0.568716	0.49441	0.971046	0.925857	1.10839	1.74881	0.00397292	0.0156325	Up
S218	MP2K3_MOUSE	26397	Map2k3	0.181069	0.176225	0.303281	0.577643	0.544876	0.55025	2.53229	0.00139861	0.00839781	Up
S64	LST1_MOUSE	16988	Lst1	0.871681	0.750784	1.02375	2.11981	1.94885	1.63386	2.15498	0.00332307	0.0139568	Up
S1241	M3K4_MOUSE	26407	Map3k4	3.69923	1.61545	1.35754	5.30549	6.0805	6.33585	2.65606	0.010151	0.0297851	Up
S665	K4DI77_MOUSE	192652	Wdr81	0.224987	0.216873	0.265135	0.432094	0.457813	0.516683	1.98953	0.00132299	0.00807096	Up
T187	K3W4Q8_MOUSE	12215	Bsg	1.29525	1.69803	1.74731	28.5313	28.2888	27.9133	17.8741	3.30988e-08	0.000101	Up
S71	J3QNW0_MOUSE	13433	Dnmt1	0.240319	1.27084	1.69885	6.81583	5.44343	6.32826	5.7905	0.000969427	0.00680385	Up
S167	H9KV04_MOUSE	210711	Mcmbp	0.415117	0.520882	0.552088	0.903027	0.802962	1.04203	1.84668	0.00651572	0.0220307	Up
S154	H9KV04_MOUSE	210711	Mcmbp	3.55703	1.83981	1.01973	5.96094	5.48533	6.07773	2.73105	0.00856396	0.0266077	Up
S730	H9H9S3_MOUSE	24136	Zeb2	1.07543	2.28826	1.92742	3.06552	3.25153	3.12638	1.78477	0.019012	0.0472168	Up
S1137	H7BX08_MOUSE	67886	Camsap2	0.803944	0.523565	0.470502	0.947044	0.943168	0.86303	1.53127	0.0409162	0.0833778	Up
S460	H7BX02_MOUSE	381305	Rc3h1	0.325257	0.306249	0.271482	1.35947	0.94469	0.867196	3.51207	0.00791993	0.0251654	Up
T349	H3BKH3_MOUSE	212712	Satb2	0.109334	0.0818578	0.141964	0.159171	0.177294	0.218201	1.66488	0.0400249	0.0819501	Up
S1380	H3BKF6_MOUSE	13047	Cux1	0.278315	0.301308	0.310758	0.505826	0.520623	0.535971	1.75478	6.61902e-05	0.00193277	Up
T98	H3BJH7_MOUSE	216549	Aftph	0.109334	0.0818578	0.141964	0.159171	0.177294	0.218201	1.66488	0.0400249	0.0819501	Up
S39	ARFP1_MOUSE	99889	Arfip1	0.351144	0.419833	0.502303	0.802815	0.871063	0.779395	1.92674	0.00159348	0.00908272	Up
S114	G5E8U9_MOUSE	12175	Bnip2	6.95658	4.57426	4.19489	12.0203	13.2061	13.8784	2.48667	0.00158116	0.00903503	Up
S144	G5E884_MOUSE	18479	Pak1	0.153204	0.116058	0.0529811	0.237663	0.24609	0.351675	2.59254	0.0218472	0.0522885	Up
S1049	TRIPC_MOUSE	14897	Trip12	4.24123	2.30976	1.77287	8.79837	8.82223	8.95142	3.19227	0.00126313	0.00787387	Up
T426	G5E866_MOUSE	81898	Sf3b1	0.130996	0.173566	0.176692	0.472434	0.382461	0.40975	2.62781	0.00101432	0.00692832	Up
S1215	AT2B1_MOUSE	67972	Atp2b1	0.0845992	0.0532787	0.0955266	0.115004	0.138803	0.154049	1.74742	0.0268189	0.0608932	Up
S1219	AT2B1_MOUSE	67972	Atp2b1	0.0845992	0.0532787	0.0955266	0.115004	0.138803	0.154049	1.74742	0.0268189	0.0608932	Up
S1211	AT2B1_MOUSE	67972	Atp2b1	1.13115	1.42503	1.09907	3.25668	3.1382	3.10151	2.59802	6.84526e-05	0.00195421	Up
S512	G3X9Z4_MOUSE	74737	Pcf11	1.29792	1.02635	0.863827	2.76788	2.46881	2.29329	2.3619	0.00152222	0.00882323	Up
S14	G3X9Z3_MOUSE	68742	Tmem219	0.0900626	0.0868472	0.109049	0.242477	0.270376	0.230474	2.59942	0.00037102	0.00400643	Up
S378	G3X9Q6_MOUSE	207214	Larp4	1.07098	1.11632	1.31656	2.43454	2.76267	2.51509	2.20109	0.000350801	0.00389861	Up
S875	G3X9Q3_MOUSE	70719	Arhgap45	0.803448	0.857457	0.882742	1.60076	1.49776	1.47174	1.79674	0.000123069	0.00236383	Up
S618	G3X9Q3_MOUSE	70719	Arhgap45	2.56812	2.44151	2.20884	4.18132	4.13775	4.17512	1.73087	7.75673e-05	0.00198696	Up
S697	G3X9H7_MOUSE	211401	Mtss1	0.121123	0.115615	0.127951	0.298768	0.291198	0.240695	2.27773	0.00111805	0.00736632	Up
S554	G3X8T2_MOUSE	76014	Zc3h18	7.80059	5.70864	5.74338	9.5436	10.1897	9.68422	1.52797	0.00921722	0.0279163	Up
S217	G3UYA7_MOUSE	329727	Dennd2c	0.548451	0.287999	0.0890869	1.37694	1.3718	1.40123	4.48386	0.00128534	0.00795451	Up
S1049	G3UX48_MOUSE	53761	Prrc2a	2.38825	1.52753	1.25163	5.41605	4.33023	4.18253	2.69551	0.004874	0.0180128	Up
S1053	G3UX48_MOUSE	53761	Prrc2a	1.72919	1.34071	1.25163	2.23932	2.07749	2.39835	1.55389	0.0100246	0.0295649	Up
S834	G3UX48_MOUSE	53761	Prrc2a	0.317436	0.275626	0.252306	0.562537	0.474936	0.426981	1.73233	0.00939378	0.028301	Up
S323	G3UX48_MOUSE	53761	Prrc2a	1.24777	1.06566	0.597707	2.71866	2.16884	2.25235	2.4526	0.0054849	0.0195885	Up
S1413	G3UWZ0_MOUSE	217578	Baz1a	0.493821	0.301017	0.179382	0.755358	0.701955	0.814414	2.33184	0.0112235	0.0320106	Up
T6	G3UW85_MOUSE	13877	Erh	1.5642	1.73969	1.65656	4.34718	4.96659	4.8601	2.85738	0.000100468	0.00218065	Up
S232	F8WIP8_MOUSE	20750	Spp1	0.465598	0.566109	0.511507	2.70556	2.9423	3.12861	5.68714	4.3687e-05	0.00159782	Up
S235	F8WIP8_MOUSE	20750	Spp1	0.465598	0.566109	0.511507	2.70556	2.9423	3.12861	5.68714	4.3687e-05	0.00159782	Up
S62	F8WIP8_MOUSE	20750	Spp1	0.638012	0.709709	0.80396	4.90531	4.12675	4.15075	6.12675	0.000145311	0.00254833	Up
S63	F8WIP8_MOUSE	20750	Spp1	0.638012	0.709709	0.80396	4.90531	4.12675	4.15075	6.12675	0.000145311	0.00254833	Up
S284	F8WIP8_MOUSE	20750	Spp1	0.553398	0.595746	0.72922	5.22891	5.46904	5.39281	8.56637	7.2774e-07	0.000268365	Up
S272	F8WIP8_MOUSE	20750	Spp1	0.27196	0.111431	0.185993	7.55291	7.56122	8.06895	40.7161	1.81069e-06	0.000352965	Up
S572	F8WGX5_MOUSE	240283	Dmxl1	0.770328	0.401349	0.283098	1.09186	1.11084	1.1929	2.3341	0.012508	0.0345974	Up
T1048	F8VQC9_MOUSE	218756	Slc4a7	0.0634671	0.0894221	0.0529258	0.490901	0.487715	0.641524	7.87182	0.000813911	0.00608613	Up
S60	F8VQC9_MOUSE	218756	Slc4a7	0.162483	0.140531	0.169539	0.598629	0.504319	0.519752	3.4339	0.00023006	0.00327967	Up
S238	F8VQC9_MOUSE	218756	Slc4a7	0.765783	0.75902	0.683547	2.6149	3.05287	2.71772	3.79718	0.000107228	0.00222135	Up
S1609	F8VQ54_MOUSE	192119	Dicer1	0.271563	0.29083	0.272848	0.492558	0.4571	0.42005	1.6399	0.00122871	0.00774382	Up
S1144	ARI4A_MOUSE	238247	Arid4a	0.891214	0.429073	0.472783	0.927947	1.06461	1.16748	1.76236	0.0488875	0.0959147	Up
S142	F6WIU1_MOUSE	215194	Kri1	1.02639	1.05348	0.884265	5.4903	5.25369	4.21396	5.04632	0.000539004	0.00490179	Up
S299	F6WBP9_MOUSE	116873	Stim2	0.137399	0.13675	0.0949874	0.565956	0.540825	0.590828	4.59886	2.52718e-05	0.00125074	Up
S56	F6TLV3_MOUSE	319448	Fndc3a	0.11205	0.136767	0.158332	0.310339	0.351506	0.281346	2.31658	0.00183711	0.00983079	Up
S157	F6RND9_MOUSE	26936	Mprip	0.378705	0.300369	0.374396	0.6341	0.684226	0.625052	1.84474	0.000698966	0.00555366	Up
S1105	F6Q8D3_MOUSE	320940	Atp11c	0.263854	0.246455	0.278583	0.331583	0.52356	0.436799	1.63766	0.0407521	0.0831411	Up
S1194	E9QPI5_MOUSE	71521	Pds5a	0.42299	0.422357	0.4603	0.79192	0.731514	0.950274	1.89462	0.00422789	0.0163052	Up
S850	E9QN14_MOUSE	259302	Srgap3	0.106463	0.0724206	0.0823396	0.187048	0.184953	0.133771	1.93617	0.0155099	0.0405304	Up
S572	E9QM61_MOUSE	22592	Ercc5	0.121778	0.0805667	0.131919	0.399073	0.39517	0.393899	3.5545	5.55374e-05	0.00177625	Up
S1172	E9QLA5_MOUSE	70435	Inf2	2.30066	2.37396	1.69931	3.30915	3.62257	3.36203	1.61498	0.00509525	0.0185644	Up
S249	E9QKK4_MOUSE	170772	Glcci1	0.323477	0.303591	0.372623	0.652422	0.541912	0.693395	1.88831	0.00398086	0.0156325	Up
S2053	SC16A_MOUSE	227648	Sec16a	0.89275	0.724335	0.632553	1.19887	1.05499	1.21946	1.54395	0.0114297	0.0324536	Up
S2101	SC16A_MOUSE	227648	Sec16a	0.34219	0.277774	0.221166	0.834135	0.781765	0.911048	3.00423	0.000394601	0.00414078	Up
S687	E9QAS3_MOUSE	19260	Ptpn22	8.57413	6.26304	8.83955	13.3277	12.0775	13.0966	1.62614	0.00544366	0.0195328	Up
S539	E9QAS3_MOUSE	19260	Ptpn22	0.874252	0.765141	0.754411	1.70522	1.65703	1.81785	2.16396	0.000109384	0.00224564	Up
S452	E9QAS3_MOUSE	19260	Ptpn22	0.315847	0.260575	0.305029	0.469245	0.497864	0.503047	1.66788	0.000594642	0.00520748	Up
S111	E9Q9Q2_MOUSE	226412	R3hdm1	0.101241	0.12252	0.108467	0.285956	0.256064	0.232291	2.33065	0.000917682	0.00656842	Up
S1007	E9Q9Q2_MOUSE	226412	R3hdm1	0.714292	0.539706	0.636571	1.22129	1.08863	1.08752	1.79705	0.0017172	0.00948053	Up
S1189	E9Q9C3_MOUSE	17356	Afdn	13.7411	7.56199	4.69991	30.4566	30.8214	29.0611	3.47418	0.00140172	0.00840912	Up
S424	E9Q9C3_MOUSE	17356	Afdn	0.463633	0.365465	0.334328	1.21074	1.17317	1.19531	3.07645	3.7602e-05	0.00150782	Up
S744	E9Q7P6_MOUSE	14260	Fmn1	0.860762	0.840124	0.745228	1.31211	1.18174	1.30083	1.55131	0.00120473	0.00763836	Up
S1001	MYO1E_MOUSE	71602	Myo1e	0.282848	0.222499	0.20342	0.605239	0.628917	0.832001	2.91514	0.00396478	0.0156325	Up
S4890	E9Q616_MOUSE	66395	Ahnak	18.5709	16.3028	14.4866	42.0648	39.1149	37.4693	2.40374	0.000207914	0.00311552	Up
Y835	E9Q616_MOUSE	66395	Ahnak	0.203257	0.0930587	0.10634	1.07845	1.22178	1.19327	8.67615	5.10089e-05	0.00174397	Up
S5393	E9Q616_MOUSE	66395	Ahnak	0.591276	0.583092	0.671966	3.42855	2.9838	3.25143	5.23403	3.92452e-05	0.00151997	Up
S5362	E9Q616_MOUSE	66395	Ahnak	0.0497323	0.0378958	0.0448711	0.122783	0.147182	0.120485	2.94682	0.000731787	0.00575249	Up
S2985	E9Q616_MOUSE	66395	Ahnak	20.9165	15.6891	15.549	27.6772	31.6403	31.9608	1.75015	0.0043342	0.0166296	Up
S309	YTDC1_MOUSE	231386	Ythdc1	0.862025	0.958747	0.991547	1.83743	2.05197	2.0967	2.12853	0.000286377	0.00360304	Up
S1000	E9Q3Y4_MOUSE	80877	Lrba	0.316337	0.301453	0.297324	0.520611	0.445605	0.457628	1.55592	0.00210498	0.0106209	Up
S827	E9Q3P4_MOUSE	108000	Cenpf	2.94966	2.44121	2.39099	4.5736	4.71866	4.37442	1.75623	0.000659497	0.0054169	Up
T370	E9Q3G8_MOUSE	218210	Nup153	0.112574	0.105724	0.10499	0.279728	0.359175	0.303009	2.91353	0.000961327	0.0067624	Up
S603	E9Q3G8_MOUSE	218210	Nup153	0.0955327	0.0942118	0.133769	0.264353	0.339056	0.323531	2.86522	0.00154705	0.00892942	Up
S1677	ICE1_MOUSE	218333	Ice1	0.394383	0.460173	0.503353	1.15103	1.02652	1.04654	2.3743	0.000238862	0.00334944	Up
S439	I2BP2_MOUSE	270110	Irf2bp2	0.779858	0.315313	0.350441	1.31561	1.29486	1.38512	2.76394	0.00499542	0.0183272	Up
S226	I2BP2_MOUSE	270110	Irf2bp2	2.64811	3.16475	2.88795	4.66487	4.69631	4.72624	1.61909	0.000281444	0.0035871	Up
S338	E9Q166_MOUSE	320817	Atad2b	0.459592	0.443833	0.491188	2.3743	2.07088	1.76098	4.45009	0.000832851	0.00619084	Up
S339	E9Q166_MOUSE	320817	Atad2b	0.459592	0.443833	0.491188	2.3743	2.07088	1.76098	4.45009	0.000832851	0.00619084	Up
S857	E9PZM7_MOUSE	72193	Scaf11	2.77015	1.6097	1.2102	11.1481	10.6475	10.8462	5.83926	5.12815e-05	0.00174397	Up
S859	E9PZM7_MOUSE	72193	Scaf11	3.89766	2.86921	2.27643	13.0219	12.2224	12.2163	4.14236	6.38313e-05	0.00189677	Up
S841	E9PZM7_MOUSE	72193	Scaf11	0.187172	0.130284	0.1694	0.393238	0.560273	0.431821	2.84547	0.00490258	0.0180931	Up
S843	E9PZM7_MOUSE	72193	Scaf11	0.187172	0.130284	0.1694	0.393238	0.560273	0.431821	2.84547	0.00490258	0.0180931	Up
S358	E9PYI8_MOUSE	59025	Usp14	0.913361	0.687517	0.461039	7.42187	5.98421	5.64541	9.23969	0.00053802	0.00490029	Up
S92	E9PYD5_MOUSE	21399	Tcea1	0.252966	0.253023	0.286659	0.475501	0.434457	0.47895	1.75224	0.000396747	0.00414078	Up
S329	E9PYD3_MOUSE	68299	Vps53	0.468098	0.431025	0.422813	1.04863	1.06909	1.01819	2.37221	7.58891e-06	0.000712838	Up
S123	E9PWH3_MOUSE	11787	Apbb2	0.19352	0.108736	0.147623	0.309316	0.297182	0.302461	2.02045	0.00347868	0.0143686	Up
S445	E9PWB1_MOUSE	102693	Phldb1	0.261953	0.0879754	0.04425	0.549229	0.641787	0.580828	4.49503	0.00307209	0.0133409	Up
S158	E9PW37_MOUSE	226525	Rasal2	1.32192	0.880173	0.659358	1.94033	1.93947	1.8641	2.00733	0.00809118	0.0256294	Up
S2045	E9PV45_MOUSE	329908	Usp24	7.29975	3.28515	1.89986	16.9679	15.2573	16.5587	3.90747	0.00205663	0.0104307	Up
S763	E9PUP3_MOUSE	240215	Slc4a9	0.510243	0.604622	0.572033	0.840435	0.911453	0.808327	1.51771	0.00210926	0.0106347	Up
S799	E9PUK6_MOUSE	51796	Srrm1	1.10772	0.651551	0.683196	1.57649	1.46393	1.35725	1.80051	0.0152154	0.0399587	Up
S723	E9PUK6_MOUSE	51796	Srrm1	25.7114	25.0851	25.7254	41.7295	42.6669	43.8573	1.67604	1.20647e-05	0.000850742	Up
S725	E9PUK6_MOUSE	51796	Srrm1	25.7114	25.0851	25.7254	41.7295	42.6669	43.8573	1.67604	1.20647e-05	0.000850742	Up
S731	E9PUK6_MOUSE	51796	Srrm1	26.6497	26.2893	26.9255	44.5944	45.5348	47.052	1.71767	1.33164e-05	0.000882057	Up
S733	E9PUK6_MOUSE	51796	Srrm1	0.938384	1.20425	1.20013	2.56024	2.61348	2.87686	2.40836	0.000283209	0.00359742	Up
S401	E9PUK6_MOUSE	51796	Srrm1	0.0339723	1.24796	0.22768	1.74569	2.02821	1.55093	3.52728	0.0338721	0.0726043	Up
T404	E9PUK6_MOUSE	51796	Srrm1	0.0339723	1.24796	0.22768	1.74569	2.02821	1.55093	3.52728	0.0338721	0.0726043	Up
S616	E9PUK6_MOUSE	51796	Srrm1	12.992	6.54766	3.48608	67.1609	52.2425	45.6967	7.17025	0.00241363	0.0115643	Up
S295	E9PUK3_MOUSE	214459	Fnbp1l	5.9062	2.96616	1.99254	18.5273	18.1221	16.93	4.93143	0.00036077	0.00395175	Up
S24	E0CY61_MOUSE	108943	Trmt10a	1.85329	0.764388	0.418272	17.9436	15.3433	12.3799	15.042	0.00103286	0.00699197	Up
S48	D6RFT9_MOUSE	22682	Zfand5	1.00718	1.22774	1.23467	3.12548	3.89989	3.20095	2.94742	0.000942914	0.0066793	Up
S151	D3Z7B7_MOUSE	74048	Vsir	1.10073	1.18256	1.00297	1.77352	1.96579	1.74273	1.66817	0.00109179	0.00725426	Up
S124	D3Z783_MOUSE	11651	Akt1	0.457308	0.347141	0.301187	0.654689	0.733678	0.659798	1.85248	0.00402672	0.0157598	Up
S30	D3Z6F8_MOUSE	66498	Dda1	0.838584	0.51019	0.432264	1.25912	1.05889	1.14482	1.94428	0.0150781	0.0397046	Up
S962	D3Z5I9_MOUSE	381626	Rbm33	1.15286	1.03875	1.09153	1.83138	1.84143	1.89143	1.69479	3.62109e-05	0.00149616	Up
S317	D3Z5I9_MOUSE	381626	Rbm33	0.709041	0.596514	0.569823	0.854947	1.05825	0.991185	1.54869	0.00952606	0.0285594	Up
T110	D3Z3E0_MOUSE	107823	Nsd2	1.00693	0.910221	1.03799	5.95332	6.30943	6.40749	6.31788	3.33837e-06	0.000467167	Up
S504	D3Z390_MOUSE	76895	Bicd2	2.99873	1.39374	0.725094	8.1953	7.70025	6.74275	4.42364	0.00185506	0.00988354	Up
S13	SELN_MOUSE	74777	Selenon	1.38911	0.657036	0.438307	8.55672	4.72634	5.73499	7.65482	0.00956489	0.0286029	Up
S571	D3Z197_MOUSE	234135	Nsd3	0.683984	0.575771	0.488789	0.939301	0.931838	1.00514	1.64496	0.00353532	0.0145334	Up
S626	SAFB1_MOUSE	224903	Safb	6.48064	2.48902	1.38468	23.3058	22.4164	20.5366	6.39912	0.00044028	0.00441374	Up
S578	RBM25_MOUSE	67039	Rbm25	6.5913	6.90121	7.54312	13.7074	13.1441	14.59	1.97006	0.000176568	0.00287584	Up
S973	DLGP4_MOUSE	228836	Dlgap4	0.56112	0.31339	0.225854	0.628085	0.670511	0.648649	1.76964	0.0492594	0.0964512	Up
S763	DLGP4_MOUSE	228836	Dlgap4	0.387121	0.136848	0.344828	0.532134	0.596032	0.557139	1.93981	0.0267447	0.060785	Up
S1486	THOC2_MOUSE	331401	Thoc2	0.19508	0.14572	0.136188	0.370953	0.360393	0.406446	2.38537	0.000659634	0.0054169	Up
S61	B1AYU7_MOUSE	80744	Cwc22	1.62602	0.926351	0.496076	2.49898	1.99687	2.00347	2.13201	0.0355804	0.0753474	Up
S81	NFX1_MOUSE	74164	Nfx1	0.319851	0.202715	0.192986	0.516945	0.461606	0.457161	2.00644	0.00598121	0.0207182	Up
S205	B1AVP1_MOUSE	17355	Aff1	0.696945	0.70879	0.656438	1.07722	1.20019	1.124	1.64943	0.000338603	0.00384499	Up
S951	B1AS67_MOUSE	269608	Plekhg5	0.423864	0.402748	0.367846	0.746125	0.825529	0.767158	1.95805	0.000188434	0.00298447	Up
S925	B1AS67_MOUSE	269608	Plekhg5	0.883702	0.786785	0.816858	1.76945	1.71069	1.78315	2.11603	1.39932e-05	0.0009052	Up
S4456	B1ARU4_MOUSE	11426	Macf1	1.90033	1.77488	1.51942	3.33568	3.15527	2.8571	1.79956	0.00150425	0.0087412	Up
S101	B0QZL9_MOUSE	53902	Rcan3	0.491399	0.492212	0.444076	0.844211	0.95146	1.03603	1.98342	0.00125948	0.00787078	Up
S105	B0QZL9_MOUSE	53902	Rcan3	1.3993	1.29607	1.35554	2.00177	2.18228	2.28162	1.5961	0.000765602	0.00589827	Up
S1006	THADA_MOUSE	240174	Thada	0.155994	0.195696	0.157058	0.249209	0.30522	0.228256	1.53845	0.0259263	0.059338	Up
S286	A4QPF5_MOUSE	244864	Layn	1.99712	1.98817	1.95623	3.37418	3.20997	3.02762	1.61773	0.000264987	0.00350115	Up
S62	A3KGR9_MOUSE	14950	H13	0.718614	0.404577	0.307271	1.21271	1.23853	1.08375	2.47122	0.00619806	0.0212501	Up
S418	BLT3B_MOUSE	-	-	4.2653	7.16808	6.6432	8.81762	9.20686	9.72891	1.53532	0.0257311	0.0589503	Up
S482	ARI4B_MOUSE	94246	Arid4b	0.290729	0.283886	0.307949	0.469867	0.460722	0.525034	1.64931	0.000859285	0.00632201	Up
S384	ARI1A_MOUSE	93760	Arid1a	0.342933	0.285859	0.200858	0.596838	0.535926	0.568222	2.05024	0.00293497	0.0130041	Up
S45	A2BFB0_MOUSE	21428	Mlx	0.516263	0.490457	0.50725	0.924542	0.886839	0.928719	1.80988	1.17201e-05	0.000850742	Up
T1969	BAZ2B_MOUSE	407823	Baz2b	0.364983	0.344111	0.13227	0.621691	0.650817	0.676614	2.31662	0.00829192	0.0260696	Up
S237	MS18B_MOUSE	70645	Oip5	0.904582	0.788414	0.869093	2.75085	2.6943	2.61418	3.14561	4.01234e-06	0.000502292	Up
S428	A2APM3_MOUSE	12505	Cd44	39.4919	35.1845	31.5198	58.3025	57.5143	56.6621	1.62415	0.000715636	0.00564685	Up
S20	A2API1_MOUSE	12448	Ccne2	0.223556	0.168648	0.187	0.327411	0.388829	0.400875	1.92871	0.00301049	0.0131765	Up
S2716	UBR4_MOUSE	69116	Ubr4	0.651234	0.166489	0.287366	2.39109	2.73321	2.74725	7.123	0.000268136	0.00352159	Up
S1280	PLPL7_MOUSE	241274	Pnpla7	0.323683	0.368495	0.308325	0.460776	0.516752	0.536544	1.51331	0.00411715	0.015986	Up
S438	A2AEM2_MOUSE	229725	Clcc1	0.265862	0.0733406	0.0794976	1.61091	1.39095	1.07416	9.73494	0.00191936	0.0100716	Up
S459	RHG27_MOUSE	544817	Arhgap27	2.28732	2.3654	1.89136	5.02823	4.89225	4.72861	2.23853	9.24796e-05	0.00212235	Up
S469	RHG27_MOUSE	544817	Arhgap27	2.15182	2.2234	1.96106	4.54897	4.49808	4.53771	2.14396	7.08754e-06	0.000688769	Up
S101	A2AA85_MOUSE	213491	Szrd1	6.9166	6.43927	6.78406	9.96195	10.875	10.7493	1.56834	0.000280587	0.0035871	Up
S454	TM201_MOUSE	230917	Tmem201	0.74992	0.689692	0.730556	1.06899	1.18555	1.15475	1.57098	0.000455752	0.00449654	Up
S788	ZEP3_MOUSE	16656	Hivep3	0.198655	0.226128	0.225089	0.455829	0.443055	0.391449	1.98552	0.000591792	0.00519751	Up
S555	ZEP3_MOUSE	16656	Hivep3	0.294062	0.204195	0.339231	0.657184	0.648324	0.652902	2.33843	0.000715178	0.00564685	Up
S97	A2A842_MOUSE	269587	Epb41	2.07563	1.01715	0.627048	5.00579	5.02067	5.02303	4.04576	0.000950082	0.00671723	Up
S508	A2A842_MOUSE	269587	Epb41	17.6194	17.0036	17.9386	26.7562	26.5095	26.8216	1.52369	5.98096e-06	0.000621385	Up
S614	A2A842_MOUSE	269587	Epb41	1.3152	0.399751	0.190311	7.98535	6.11963	5.51368	10.2971	0.00197197	0.0101898	Up
S182	A2A842_MOUSE	269587	Epb41	0.505057	0.634534	0.532157	1.06361	1.03326	0.888017	1.78549	0.00283798	0.0126693	Up
S883	K1522_MOUSE	97130	Kiaa1522	0.293998	0.353492	0.653698	1.22809	1.25588	1.23756	2.8601	0.00194335	0.0101412	Up
S667	K1522_MOUSE	97130	Kiaa1522	0.211783	0.162843	0.199144	0.318006	0.341668	0.369034	1.79289	0.00188041	0.00991846	Up
S671	K1522_MOUSE	97130	Kiaa1522	0.211783	0.162843	0.199144	0.318006	0.341668	0.369034	1.79289	0.00188041	0.00991846	Up
S959	K1522_MOUSE	97130	Kiaa1522	0.231306	0.207461	0.253861	0.416401	0.361658	0.386653	1.68158	0.00161613	0.0091737	Up
S909	K1522_MOUSE	97130	Kiaa1522	2.01354	1.99287	1.9857	3.82411	3.98843	3.89	1.95299	2.51112e-06	0.000419969	Up
S402	K1522_MOUSE	97130	Kiaa1522	1.18121	0.963139	1.01491	1.54232	1.46369	1.77664	1.51385	0.00919401	0.0278583	Up
T733	A2A7B5_MOUSE	110593	Prdm2	0.486374	0.434649	0.127846	0.754436	0.812705	0.78983	2.24715	0.0182551	0.0458181	Up
S330	A2A7B5_MOUSE	110593	Prdm2	0.449165	0.423001	0.347371	0.908359	0.833656	0.81291	2.095	0.000452324	0.00447559	Up
S221	A2A716_MOUSE	71240	Osbpl7	0.10141	0.0696259	0.0744599	0.163198	0.153699	0.107866	1.73023	0.038875	0.0802426	Up
S522	A2A4P3_MOUSE	-	Gm27029	0.260038	0.223924	0.700922	0.878252	0.801606	0.836213	2.12347	0.0457401	0.0911115	Up
S1308	A2A468_MOUSE	17979	Ncoa3	0.446661	0.213253	0.0566036	1.55383	1.363	1.33933	5.94007	0.000869095	0.00635329	Up
S286	A0A7N9VR94_MOUSE	100041194	Ahnak2	1.29357	0.560995	0.259181	2.11626	1.96727	2.1657	2.95648	0.0116342	0.0328024	Up
S55	A0A6I8MX07_MOUSE	99412	Golga2	0.867412	1.02703	0.997087	1.23892	1.50734	1.64613	1.51906	0.0179458	0.0451575	Up
S1565	A0A5H1ZRL7_MOUSE	27223	Trp53bp1	0.07272	0.0871162	0.0834095	0.304732	0.218285	0.210457	3.01536	0.00586329	0.0204418	Up
S1162	A0A5F8MPF3_MOUSE	194401	Mical3	0.0734966	0.103157	0.0825396	0.207857	0.192681	0.181052	2.24385	0.000784325	0.00598233	Up
S973	A0A5F8MP98_MOUSE	319939	Tns3	2.54403	1.54141	1.63126	2.96978	3.64582	3.19977	1.71696	0.0222379	0.0529312	Up
S957	A0A5F8MP98_MOUSE	319939	Tns3	0.225902	0.200669	0.220555	0.53523	0.521599	0.519624	2.43609	4.46299e-06	0.000527633	Up
S882	A0A5F8MP98_MOUSE	319939	Tns3	7.48771	7.08475	7.23342	12.8915	11.5529	11.5557	1.65093	0.000508244	0.00473255	Up
S865	A0A5F8MP98_MOUSE	319939	Tns3	2.04052	1.6234	2.35632	3.77217	3.59446	3.44725	1.79626	0.00233326	0.0113105	Up
S761	A0A5F8MP98_MOUSE	319939	Tns3	0.301115	0.32816	0.344985	0.475194	0.492171	0.494884	1.50088	0.000330173	0.00378947	Up
S684	A0A5F8MP98_MOUSE	319939	Tns3	0.237461	0.381594	0.30408	0.579001	0.572941	0.532311	1.82449	0.00454607	0.017166	Up
S605	A0A5F8MP98_MOUSE	319939	Tns3	1.03838	0.944347	1.02585	1.70644	1.67153	1.60151	1.65509	0.000103842	0.00221132	Up
S1443	A0A5F8MP98_MOUSE	319939	Tns3	0.100917	0.0795607	0.0976649	0.159723	0.165738	0.192806	1.86332	0.00275073	0.0124091	Up
S9	A0A571BGH0_MOUSE	16498	Kcnab2	0.752687	0.714705	0.564876	1.05787	1.14301	1.0021	1.57606	0.00519766	0.0188573	Up
S284	A0A571BG95_MOUSE	109934	Abr	0.562126	0.555797	0.263126	0.733186	1.09983	0.949701	2.01493	0.0322763	0.0700804	Up
S37	A0A498WGL8_MOUSE	245857	Ssh3	0.195386	0.149468	0.0715032	0.654208	0.786816	0.668396	5.06637	0.000524906	0.00483774	Up
S147	A0A498WFS2_MOUSE	225896	Ubxn1	1.53087	1.38227	1.59215	3.1794	3.07172	3.59737	2.18598	0.000490882	0.00466202	Up
S308	A0A494BB08_MOUSE	78317	Ccdc88b	0.304432	0.393968	0.383659	0.522202	0.640152	0.498034	1.53447	0.0209949	0.0508521	Up
S960	A0A3B2WBH9_MOUSE	21873	Tjp2	3.061	2.83185	3.04324	4.89153	5.1977	4.9213	1.67976	7.75536e-05	0.00198696	Up
S968	A0A3B2WBH9_MOUSE	21873	Tjp2	16.1442	14.9198	15.8442	23.4812	23.5453	23.6018	1.50567	2.83941e-05	0.00131532	Up
S239	A0A3B2WBH9_MOUSE	21873	Tjp2	0.852611	1.4568	1.55203	2.90883	3.01239	2.89844	2.28403	0.00173878	0.0095101	Up
S213	A0A3B2WBH9_MOUSE	21873	Tjp2	9.61864	8.4857	7.5165	13.8893	13.5774	13.7787	1.60984	0.00106071	0.00710284	Up
S594	A0A3B2W7J8_MOUSE	18810	Plec	2.10614	0.887734	0.501188	3.99484	3.74743	3.40291	3.18883	0.00765573	0.0245995	Up
S206	A0A3B2W7J8_MOUSE	18810	Plec	0.0726206	0.0870112	0.0861387	0.144741	0.122527	0.153429	1.71175	0.00482168	0.0178908	Up
S521	A0A338P6P6_MOUSE	78618	Acap2	1.53281	1.47623	1.55101	2.8927	2.58861	2.88834	1.83542	0.000249936	0.00342078	Up
S200	A0A338P6J9_MOUSE	12380	Cast	0.893546	0.795458	0.843679	1.67659	1.57145	1.43671	1.84972	0.000666656	0.00545497	Up
S108	A0A2R8W718_MOUSE	223754	Tbc1d22a	0.703417	0.694911	0.608224	1.28456	1.03982	1.22159	1.7672	0.00295564	0.013044	Up
S349	A0A2I3BRL8_MOUSE	652988	Gm7324	1.81885	0.888012	0.545689	4.12046	7.4152	3.71109	4.68763	0.0315671	0.0689348	Up
T363	A0A2I3BPQ5_MOUSE	67302	Zc3h13	2.30783	0.926502	0.546714	3.52909	3.55685	3.44157	2.78429	0.0137638	0.0373184	Up
S1254	A0A2I3BPP1_MOUSE	22084	Tsc2	0.550371	0.621148	0.661593	1.26486	1.18741	1.26538	2.02806	0.000111694	0.00224641	Up
S62	A0A286YDN0_MOUSE	20411	Sorbs1	0.179173	0.093876	0.0905469	0.655261	0.495085	0.484185	4.49547	0.00246403	0.0117007	Up
S333	A0A1Y7VLJ5_MOUSE	83924	Gpr137b	0.0674501	0.0827259	0.114466	0.349034	0.238235	0.282486	3.28653	0.00452239	0.0171421	Up
S84	A0A1W2P7F9_MOUSE	12226	Btg1	0.328489	0.40297	0.315996	1.09044	1.08784	0.980179	3.01537	0.000100731	0.00218065	Up
S295	A0A1D5RMM7_MOUSE	215114	Hip1	0.238049	0.192378	0.139343	0.47574	0.397594	0.404923	2.24346	0.00336941	0.0140964	Up
S152	A0A1D5RM97_MOUSE	546071	Mast3	0.336634	0.243864	0.281503	0.494215	0.556599	0.501048	1.8003	0.00233402	0.0113105	Up
S734	A0A1D5RM97_MOUSE	546071	Mast3	0.139504	0.12141	0.183239	0.29599	0.282714	0.331141	2.0485	0.00266101	0.0121725	Up
S1213	A0A1D5RM97_MOUSE	546071	Mast3	0.425758	0.413732	0.445878	0.797647	0.770198	0.78276	1.82874	8.52321e-06	0.000730546	Up
S85	A0A1C7CYU3_MOUSE	18220	Nucb1	0.153472	0.187301	0.192741	0.350905	0.33431	0.341068	1.92363	0.000239448	0.0033508	Up
T433	A0A1B0GRZ5_MOUSE	54006	Deaf1	0.154863	0.163713	0.204339	0.567142	0.721839	0.693352	3.79093	0.000620846	0.00527526	Up
S552	A0A1B0GRJ0_MOUSE	75767	Rab11fip1	0.41431	0.401152	0.393509	0.687598	0.554539	0.596718	1.52101	0.00614846	0.021138	Up
S101	A0A1B0GQU8_MOUSE	19899	Rpl18	0.416075	0.443726	0.495107	0.711692	0.702293	0.750878	1.59779	0.000605431	0.00523059	Up
S232	A0A171EBK7_MOUSE	74048	Vsir	1.48231	1.26532	1.28765	2.52263	2.30708	2.62318	1.84693	0.000601601	0.00522836	Up
S262	A0A140LIQ1_MOUSE	57752	Tacc2	0.181953	0.234886	0.216138	0.433967	0.383604	0.426677	1.96571	0.00076495	0.00589827	Up
T588	A0A0R4J1Q0_MOUSE	234699	Edc4	0.282788	0.280969	0.227793	0.412471	0.42583	0.47443	1.65843	0.00263503	0.0121021	Up
S785	A0A0R4J1Q0_MOUSE	234699	Edc4	6.68358	6.32108	5.90052	10.2767	10.1133	9.68462	1.59082	0.000203686	0.00310085	Up
S134	A0A0R4J195_MOUSE	70470	Rprd1b	1.29525	0.724092	0.387564	3.3837	3.13142	3.18458	4.02994	0.000914643	0.00655351	Up
S518	A0A0R4J187_MOUSE	14375	Xrcc6	0.0868392	0.163361	0.131964	0.258792	0.220068	0.22339	1.83756	0.0137459	0.0372848	Up
S172	A0A0R4J101_MOUSE	20535	Slc4a2	2.21625	2.35081	2.68723	3.7405	4.0266	3.80986	1.59588	0.000935207	0.00666602	Up
S318	A0A0R4J0P5_MOUSE	19200	Pstpip1	2.1396	2.16978	2.08451	3.74659	4.02967	3.71092	1.79659	8.20209e-05	0.00201764	Up
S298	A0A0R4J0P5_MOUSE	19200	Pstpip1	1.63209	1.4324	1.39671	2.83377	2.99129	2.98108	1.97394	8.41291e-05	0.00203214	Up
S886	A0A0R4J0J8_MOUSE	74392	Specc1l	0.222423	0.152616	0.11491	0.482148	0.422059	0.413298	2.68906	0.0019525	0.0101503	Up
S486	A0A0R4IZZ6_MOUSE	55935	Fnbp4	0.328171	0.24085	0.274993	1.66348	1.53209	1.14274	5.14009	0.00182189	0.00980424	Up
S8	A0A0J9YUK0_MOUSE	22215	Ube3a	0.180596	0.117379	0.0945903	0.297253	0.247071	0.373578	2.33822	0.0175184	0.0444574	Up
T829	A0A0J9YUH4_MOUSE	72313	Fryl	0.288399	0.176284	0.234086	0.458839	0.381772	0.483046	1.89427	0.00944104	0.028406	Up
S838	A0A0J9YTU3_MOUSE	432572	Specc1	2.96394	3.05156	3.07417	11.0153	11.4055	11.0045	3.67729	4.74661e-07	0.000232482	Up
S343	A0A0J9YTU3_MOUSE	432572	Specc1	2.20157	2.38503	1.24357	3.21894	3.53892	3.30979	1.72682	0.0182366	0.0457928	Up
S133	A0A0J9YTU3_MOUSE	432572	Specc1	1.74697	0.779439	0.377369	6.12491	5.77795	5.09094	5.85231	0.000757681	0.00585729	Up
S21	A0A0G2JGV2_MOUSE	29815	Bcar3	0.135905	0.551873	0.118706	0.76172	0.782274	0.812003	2.92132	0.0221958	0.0529312	Up
S1011	A0A0A6YY83_MOUSE	54216	Pcdh7	3.79813	3.85445	3.32232	5.96276	5.22077	5.47983	1.51832	0.00232715	0.0113092	Up
S147	A0A0A6YWN9_MOUSE	71472	Usp19	0.848573	0.328284	0.800426	1.76617	1.11518	1.6691	2.30137	0.0306953	0.067396	Up
S899	A0A0A0MQ79_MOUSE	226562	Prrc2c	0.493924	0.444168	0.354914	0.972851	1.09989	1.15842	2.49895	0.000693497	0.00553817	Up
S322	A0A087WNV1_MOUSE	15463	Agfg1	0.608822	0.486782	0.528452	1.17109	1.15189	1.18264	2.15856	7.0416e-05	0.00195421	Up
S1821	A0A087WNL7_MOUSE	100043597	Srcap	0.247991	0.200839	0.142849	0.628227	0.517262	0.563187	2.88784	0.00109494	0.00726818	Up

## Sheet: Table S3
Cluster	ID	Description	pvalue	p.adjust	qvalue	geneID	Count
down	GO:0016607	nuclear speck	2.64545e-19	1.23013e-16	8.04773e-17	Mef2c/Rbm8a/Zc3h13/Prpf40a/Pnisr/Ppig/Usp36/Erbin/Srrm1/Gpatch2/Afdn/Pip5k1a/Zc3h18/Sf3b1/Trip12/Son/Sap130/Lmna/Rbbp6/Srsf10/Alkbh5/Sf3b2/Tcf12/Ccnl1/Npm1/Snrnp70/Cdk13/Hectd1/Dgkq/Fam76b/Ddx42/Srrm2/Dock1/Sde2/Aagab/Basp1/Prpf3/Wbp11/Srsf9	39
down	GO:0034399	nuclear periphery	3.40464e-15	7.91579e-13	5.17863e-13	Prpf40a/Ppig/Srrm1/Blm/Dnmt3a/Sf3b1/Atn1/Lmnb1/Lmna/Npm1/Dgkq/Nup98/Tpr/Ahctf1/Basp1/Psip1/Hnrnpm/Stag1/Akap8/Nufip1/Ncor2	21
down	GO:0000775	chromosome, centromeric region	2.81441e-14	4.08753e-12	2.67413e-12	Trp53bp1/Mki67/Ncapg/Bod1l/Clasp1/Clasp2/Dnmt3a/Zwilch/Dnmt1/Suv39h1/Cenpc1/Top2a/Meaf6/Atrx/Knl1/Xpo1/Nup98/Cenpe/Tpr/Kansl1/Cdca8/Ahctf1/Uvrag/Kdm4c/Ppp1r12a/Macroh2a1/Incenp	27
down	GO:0098687	chromosomal region	4.73758e-14	4.08753e-12	2.67413e-12	Xrcc4/Rad51ap1/Trp53bp1/Mki67/Ncapg/Blm/Bod1l/Clasp1/Clasp2/Dnmt3a/Zwilch/Dnmt1/Suv39h1/Cenpc1/Cdk2/Top2a/Meaf6/Atrx/Knl1/Xpo1/Chd4/Nup98/Cenpe/Tpr/Kansl1/Cdca8/Ahctf1/Uvrag/Kdm4c/Ppp1r12a/Macroh2a1/Incenp	32
down	GO:0016363	nuclear matrix	5.01247e-14	4.08753e-12	2.67413e-12	Prpf40a/Ppig/Srrm1/Blm/Dnmt3a/Sf3b1/Atn1/Lmnb1/Lmna/Npm1/Dgkq/Ahctf1/Basp1/Hnrnpm/Stag1/Akap8/Nufip1/Ncor2	18
down	GO:0000793	condensed chromosome	5.27424e-14	4.08753e-12	2.67413e-12	Trp53bp1/Gm5934/Mki67/Ncapg/Blm/Bod1l/Clasp1/Clasp2/Zwilch/Lig3/Cenpc1/Cdk2/Top2a/Meaf6/Atrx/Knl1/Xpo1/Nup98/Cenpe/Tpr/Kansl1/Ncaph/Ahctf1/Nifk/Stag1/Akap8/Ppp1r12a/Brd4/Add3/Macroh2a1/Incenp	31
down	GO:0000228	nuclear chromosome	1.70093e-11	1.1299e-09	7.39202e-10	Srcap/Pold3/Gm5934/Ncapg/Blm/Ercc5/Sap130/Lig3/Sap30/Mcm3/Chd1/Top2a/Mcm10/Phf12/Atrx/Trim24/Helb/Smarcal1/Ncaph/Nifk/Brd4/Exosc9/Nufip1/Add3/Macroh2a1/Incenp	26
down	GO:0030496	midbody	7.87004e-11	4.57446e-09	2.99268e-09	Safb/Eml4/Nudc/Anxa2/Hsp90b1/Ctnnd1/Kif4/Cenpc1/Pkn1/Kif20a/Zfyve26/Ccdc66/Cenpe/Ctdp1/Cdca8/Cep55/Gnl3/Uvrag/Anln/Incenp/Cyld	21
down	GO:0005681	spliceosomal complex	4.27903e-10	2.21083e-08	1.44636e-08	Rbm8a/Prpf40a/Srrm1/Sf3b1/Ncl/Sf3b2/Ttf2/Snrnp70/Raly/Snrnp200/Hnrnpa3/Srrm2/Rbm17/Bud13/Eif4a3/Prpf3/Wbp11/Mtrex/Hnrnpm/Snu13/Yju2	21
down	GO:0000779	condensed chromosome, centromeric region	9.78235e-10	4.54879e-08	2.97589e-08	Trp53bp1/Ncapg/Bod1l/Clasp1/Clasp2/Zwilch/Cenpc1/Meaf6/Atrx/Knl1/Xpo1/Nup98/Cenpe/Tpr/Kansl1/Ahctf1/Ppp1r12a/Incenp	18
down	GO:0005874	microtubule	1.23405e-09	5.21666e-08	3.41282e-08	Nav1/Kif1b/Klc1/Arfgef2/Macf1/Kif13b/Bod1l/Clasp1/Clasp2/Gsk3b/Eml4/Arhgef2/Camsap2/Nudc/Bysl/Map4/Kif4/Stim1/Kif20a/Rgs14/Mapre1/Ndrg1/Cep170/Ccdc66/Kif11/Cenpe/Reep4/Incenp/Clip2/Cyld	30
down	GO:0000776	kinetochore	1.76943e-08	6.85653e-07	4.48565e-07	Trp53bp1/Bod1l/Clasp1/Clasp2/Zwilch/Cenpc1/Meaf6/Knl1/Xpo1/Nup98/Cenpe/Tpr/Kansl1/Ahctf1/Ppp1r12a/Incenp	16
down	GO:0120114	Sm-like protein family complex	2.58184e-08	9.23503e-07	6.04171e-07	Nolc1/Prpf40a/Gemin5/Gemin8/Arfgef1/Sf3b1/Smn1/Sf3b2/Snrnp70/Snrnp200/Prpf3/Snu13	12
down	GO:0030684	preribosome	2.98658e-08	9.91971e-07	6.48963e-07	Mdn1/Noc2l/Emg1/Bysl/Fam207a/Utp18/Utp14a/Bms1/Rsl1d1/Nop14/Rrp15/Snu13	12
down	GO:0005819	spindle	4.2259e-08	1.31003e-06	8.57043e-07	Tada3/Bod1l/Clasp1/Clasp2/Eml4/Nudc/Rb1/Map4/Kif20a/Rgs14/Mapre1/Npm1/Cep170/Kif11/Cenpe/Tpr/Ctdp1/Cdca8/Ccar2/Gpsm2/Stag1/Incenp/Unc119/Cyld	24
down	GO:0034708	methyltransferase complex	9.36632e-08	2.72209e-06	1.78083e-06	Kmt2d/Hdac9/Zc3h13/Zfp335/0610010K14Rik/Bod1l/Kmt2c/Kmt2b/Kmt2a/Taf6/Kansl1/Rnmt/Taf7	13
down	GO:0090734	site of DNA damage	1.46879e-07	4.01758e-06	2.62836e-06	Ints3/Xrcc4/Trp53bp1/Rnf169/Lmna/Xpc/Was/Wdr70/Samhd1/Helb/Smarcal1/Eloa	12
down	GO:0035097	histone methyltransferase complex	1.64465e-07	4.24868e-06	2.77956e-06	Kmt2d/Hdac9/Zfp335/0610010K14Rik/Bod1l/Kmt2c/Kmt2b/Kmt2a/Taf6/Kansl1/Taf7	11
down	GO:0005684	U2-type spliceosomal complex	2.10347e-07	5.14798e-06	3.36789e-06	Rbm8a/Prpf40a/Sf3b1/Sf3b2/Snrnp70/Snrnp200/Srrm2/Bud13/Eif4a3/Prpf3/Snu13/Yju2	12
down	GO:0005938	cell cortex	3.50296e-07	8.14439e-06	5.32819e-06	Exoc7/Macf1/Osbpl8/Phldb1/Mark2/Clasp1/Clasp2/Erc1/Epb41l2/Anxa2/Ncl/Cap1/Stim1/Mapre1/Lasp1/Melk/Flna/Anln/Gpsm2/Inpp5d/Add3	21
down	GO:0035861	site of double-strand break	4.47956e-07	9.91902e-06	6.48918e-06	Ints3/Xrcc4/Trp53bp1/Rnf169/Lmna/Was/Wdr70/Samhd1/Helb/Smarcal1	10
down	GO:0071013	catalytic step 2 spliceosome	1.81089e-06	3.82756e-05	2.50405e-05	Rbm8a/Srrm1/Sf3b1/Sf3b2/Raly/Snrnp200/Hnrnpa3/Srrm2/Eif4a3/Mtrex/Hnrnpm	11
down	GO:0005635	nuclear envelope	2.66556e-06	5.26969e-05	3.44752e-05	Nup210/Osbpl8/Dnajc2/Zc3hc1/Kpna4/Bnip3/Rrm2/Lmnb1/Lmna/Itpr3/Jpt1/Taf3/Utp18/Tmpo/Mapk3/Abcf1/Xpo1/Nup98/Tpr/Nup88/Ahctf1/Tor1aip1/Rtn4/Pcm1	24
down	GO:0000792	heterochromatin	2.71984e-06	5.26969e-05	3.44752e-05	Dnmt3a/Dnmt1/Suv39h1/Cenpc1/Atrx/Trim28/Top2b/Kdm4c/Psip1/Macroh2a1/Incenp	11
down	GO:0061695	transferase complex, transferring phosphorus-containing groups	3.21763e-06	5.98479e-05	3.91535e-05	Polr2a/Tada3/Pold3/Erc1/Rb1/Cdk2/Smcr8/Ccnl1/Taf3/Taf6/Cdk13/Rprd2/Phka2/Uvrag/Phkg2/Brd4/Taf7/Stk11	18
down	GO:0031965	nuclear membrane	3.87256e-06	6.92592e-05	4.53105e-05	Osbpl8/Dnajc2/Zc3hc1/Kpna4/Lmnb1/Lmna/Itpr3/Jpt1/Taf3/Utp18/Tmpo/Xpo1/Nup98/Tpr/Ahctf1/Tor1aip1/Pcm1	17
down	GO:0005657	replication fork	4.17759e-06	6.93778e-05	4.53881e-05	Pold3/Trp53bp1/Blm/Ercc5/Dnmt1/Mcm10/Helb/Smarcal1/Rfc2	9
down	GO:0030532	small nuclear ribonucleoprotein complex	4.17759e-06	6.93778e-05	4.53881e-05	Nolc1/Prpf40a/Arfgef1/Sf3b1/Sf3b2/Snrnp70/Snrnp200/Prpf3/Snu13	9
down	GO:1902554	serine/threonine protein kinase complex	6.33847e-06	0.000101634	6.64907e-05	Erc1/Rb1/Cdk2/Smcr8/Ccnl1/Cdk13/Phka2/Uvrag/Phkg2/Brd4/Stk11	11
down	GO:0000118	histone deacetylase complex	1.07546e-05	0.000163138	0.000106728	Srcap/Hdac9/Sap130/Sap30/Phf12/Kdm3a/Chd4/Rere/Ncor2	9
down	GO:0030686	90S preribosome	1.08759e-05	0.000163138	0.000106728	Noc2l/Fam207a/Utp18/Bms1/Rsl1d1/Nop14	6
down	GO:0072686	mitotic spindle	1.26494e-05	0.000183812	0.000120253	Tada3/Clasp1/Clasp2/Eml4/Nudc/Map4/Mapre1/Cep170/Kif11/Cenpe/Tpr/Gpsm2/Stag1	13
down	GO:0005721	pericentric heterochromatin	2.027e-05	0.000285623	0.000186859	Dnmt1/Cenpc1/Atrx/Kdm4c/Macroh2a1/Incenp	6
down	GO:0044665	MLL1/2 complex	2.45564e-05	0.000335639	0.00021958	0610010K14Rik/Kmt2b/Kmt2a/Taf6/Kansl1/Taf7	6
down	GO:1902911	protein kinase complex	2.52631e-05	0.000335639	0.00021958	Erc1/Rb1/Cdk2/Smcr8/Ccnl1/Cdk13/Phka2/Uvrag/Phkg2/Brd4/Stk11	11
down	GO:0030426	growth cone	3.05762e-05	0.000394943	0.000258378	Klc1/Exoc7/Clasp2/Gsk3b/Ctnnd1/Stim1/Smn1/Usp9x/Lrrk2/Fxr1/Fkbp15/Flna/Rtn4/Syap1	14
down	GO:0090575	RNA polymerase II transcription regulator complex	3.95526e-05	0.000496581	0.000324871	Tada3/Gemin5/Tcf3/Anxa2/Rb1/Cbfb/Tcf12/Taf3/Nfatc2/Taf6/Trim28/Hltf/Chd4/Med1/Taf7	15
down	GO:0030055	cell-substrate junction	4.05808e-05	0.000496581	0.000324871	Evl/Erbin/Clasp1/Clasp2/Ptk2/Mapk1/Vasp/Mdc1/Mapre1/Lasp1/Mapk3/Peak1/Plec	13
down	GO:0030427	site of polarized growth	4.43526e-05	0.00052882	0.000345962	Klc1/Exoc7/Clasp2/Gsk3b/Ctnnd1/Stim1/Smn1/Usp9x/Lrrk2/Fxr1/Fkbp15/Flna/Rtn4/Syap1	14
down	GO:0070603	SWI/SNF superfamily-type complex	4.72475e-05	0.000549252	0.00035933	Srcap/Bcl7c/Arid1a/0610010K14Rik/Sf3b1/Smarcc2/Chd4/Mybbp1a/Ddx21	9
down	GO:0071005	U2-type precatalytic spliceosome	4.88401e-05	0.000553918	0.000362382	Sf3b1/Sf3b2/Snrnp200/Srrm2/Bud13/Prpf3/Snu13	7
down	GO:0000791	euchromatin	5.27353e-05	0.000583855	0.000381967	Polr2a/Tcf3/Dnmt3a/H1f1/Trim28/Trim24/Psip1/Aff4	8
down	GO:0008023	transcription elongation factor complex	5.53758e-05	0.000594353	0.000388835	Rb1/Ccnl1/Cdk13/Eloa/Aff4/Brd4/Nufip1	7
down	GO:1904949	ATPase complex	5.62398e-05	0.000594353	0.000388835	Srcap/Bcl7c/Arid1a/0610010K14Rik/Sf3b1/Smarcc2/Chd4/Mybbp1a/Ddx21	9
down	GO:0071011	precatalytic spliceosome	6.26099e-05	0.000646969	0.000423258	Sf3b1/Sf3b2/Snrnp200/Srrm2/Bud13/Prpf3/Snu13	7
down	GO:0015030	Cajal body	6.80478e-05	0.000673239	0.000440444	Nolc1/Cdk2/Smn1/Srrm2/Prpf3/Dkc1	6
down	GO:0051233	spindle midzone	6.80478e-05	0.000673239	0.000440444	Mapre1/Cenpe/Ctdp1/Cdca8/Incenp/Unc119	6
down	GO:0000178	exosome (RNase complex)	7.02026e-05	0.000680088	0.000444925	Zfc3h1/Gtpbp1/Dis3l2/Mtrex/Exosc9	5
down	GO:0000109	nucleotide-excision repair complex	7.48366e-05	0.000710184	0.000464614	Xrcc4/Ercc5/Xpc/Rad23b	4
down	GO:0005925	focal adhesion	8.43113e-05	0.000780157	0.000510391	Evl/Clasp1/Clasp2/Ptk2/Mapk1/Vasp/Mdc1/Mapre1/Lasp1/Mapk3/Peak1/Plec	12
down	GO:1905354	exoribonuclease complex	8.6413e-05	0.000780157	0.000510391	Zfc3h1/Gtpbp1/Dis3l2/Mtrex/Exosc9	5
down	GO:0035770	ribonucleoprotein granule	8.72434e-05	0.000780157	0.000510391	Xrn1/Gigyf2/Ncl/Smn1/Trim25/Fxr1/Larp4b/Helz/Shb/Hnrnpa3/Tnrc6b/Dis3l2/Dcp1a/Mcrip2/Larp1	15
down	GO:0097525	spliceosomal snRNP complex	9.96891e-05	0.00087463	0.000572197	Prpf40a/Sf3b1/Sf3b2/Snrnp70/Snrnp200/Prpf3/Snu13	7
down	GO:0005881	cytoplasmic microtubule	0.000135518	0.0011499	0.000752286	Arfgef2/Clasp1/Clasp2/Bysl/Mapre1/Reep4/Clip2/Cyld	8
down	GO:0071006	U2-type catalytic step 1 spliceosome	0.000138693	0.0011499	0.000752286	Rbm8a/Snrnp200/Eif4a3/Yju2	4
down	GO:0071012	catalytic step 1 spliceosome	0.000138693	0.0011499	0.000752286	Rbm8a/Snrnp200/Eif4a3/Yju2	4
down	GO:0036464	cytoplasmic ribonucleoprotein granule	0.000140956	0.0011499	0.000752286	Xrn1/Gigyf2/Ncl/Smn1/Trim25/Fxr1/Larp4b/Helz/Shb/Tnrc6b/Dis3l2/Dcp1a/Mcrip2/Larp1	14
down	GO:0099738	cell cortex region	0.0001583	0.00126913	0.000830287	Phldb1/Mark2/Clasp1/Clasp2/Erc1/Gpsm2	6
down	GO:0032279	asymmetric synapse	0.000241838	0.00190601	0.00124694	Camk2g/Arfgef2/Macf1/Mtmr2/Plekha5/Gsk3b/Erc1/Arhgef2/Bnip3/Map4/Rpl12/Rgs14/Drosha/Fxr1/Rtn4/Dgcr8/Add3	17
down	GO:0071339	MLL1 complex	0.00025201	0.00195307	0.00127773	0610010K14Rik/Kmt2a/Taf6/Kansl1/Taf7	5
down	GO:0032993	protein-DNA complex	0.000306359	0.00233536	0.00152783	Pold3/Tcf3/Ercc5/Mcm3/H1f1/Meaf6/Npm1/Helb/Chd4/Smarcal1/Med1/Macroh2a1	12
down	GO:0099572	postsynaptic specialization	0.000373381	0.00280035	0.00183204	Camk2g/Macf1/Dlgap4/Mtmr2/Plekha5/Gsk3b/Erc1/Arhgef2/Bnip3/Map4/Rpl12/Rgs14/Drosha/Fxr1/Rtn4/Dgcr8/Add3	17
down	GO:0043596	nuclear replication fork	0.000394149	0.00290919	0.00190324	Pold3/Ercc5/Mcm10/Helb/Smarcal1	5
down	GO:0030863	cortical cytoskeleton	0.000483008	0.00350935	0.00229588	Clasp1/Clasp2/Erc1/Cap1/Mapre1/Lasp1/Flna/Anln/Inpp5d	9
down	GO:0098984	neuron to neuron synapse	0.000497233	0.00355713	0.00232713	Camk2g/Arfgef2/Macf1/Mtmr2/Plekha5/Gsk3b/Erc1/Arhgef2/Bnip3/Map4/Rpl12/Rgs14/Drosha/Fxr1/Rtn4/Dgcr8/Add3	17
down	GO:0014069	postsynaptic density	0.000526803	0.00371157	0.00242817	Camk2g/Macf1/Mtmr2/Plekha5/Gsk3b/Erc1/Arhgef2/Bnip3/Map4/Rpl12/Rgs14/Drosha/Fxr1/Rtn4/Dgcr8/Add3	16
down	GO:0043601	nuclear replisome	0.00055645	0.00386193	0.00252654	Pold3/Ercc5/Helb/Smarcal1	4
down	GO:0044815	DNA packaging complex	0.000623378	0.00426281	0.0027888	Bcl7c/Arid1a/Tcf3/Ncapg/H1f1/Meaf6/Smarcc2/Ncaph/Stag1/Macroh2a1	10
down	GO:0032040	small-subunit processome	0.000668763	0.00445163	0.00291233	Emg1/Utp18/Utp14a/Nop14/Snu13	5
down	GO:0030894	replisome	0.000670137	0.00445163	0.00291233	Pold3/Ercc5/Helb/Smarcal1	4
down	GO:0032797	SMN complex	0.000702105	0.00459829	0.00300828	Gemin5/Gemin8/Smn1	3
down	GO:1990391	DNA repair complex	0.000850297	0.0054915	0.00359263	Xrcc4/Trp53bp1/Ercc5/Xpc/Rad23b	5
down	GO:0000794	condensed nuclear chromosome	0.00122988	0.00783419	0.00512525	Gm5934/Ncapg/Blm/Lig3/Ncaph/Nifk/Brd4/Add3/Incenp	9
down	GO:0071782	endoplasmic reticulum tubular network	0.00129117	0.00811342	0.00530793	Osbpl8/Stim1/Reep4/Rtn4	4
down	GO:0005662	DNA replication factor A complex	0.00160498	0.00956817	0.00625965	Ercc5/Helb/Smarcal1	3
down	GO:0019908	nuclear cyclin-dependent protein kinase holoenzyme complex	0.00160498	0.00956817	0.00625965	Rb1/Cdk13/Brd4	3
down	GO:0030688	preribosome, small subunit precursor	0.00160498	0.00956817	0.00625965	Bysl/Fam207a/Nop14	3
down	GO:0042405	nuclear inclusion body	0.00160498	0.00956817	0.00625965	Nup98/Tpr/Atxn3	3
down	GO:0005732	sno(s)RNA-containing ribonucleoprotein complex	0.00196274	0.011424	0.00747376	Nolc1/Snu13/Pop1/Dkc1	4
down	GO:0150034	distal axon	0.00199328	0.011424	0.00747376	Klc1/Exoc7/Clasp2/Gsk3b/Ctnnd1/Anxa5/Stim1/Smn1/Srsf10/Usp9x/Lrrk2/Fxr1/Fkbp15/Flna/Rtn4/Syap1	16
down	GO:0033276	transcription factor TFTC complex	0.00201455	0.011424	0.00747376	Tada3/Taf6/Taf7	3
down	GO:0070822	Sin3-type complex	0.00201455	0.011424	0.00747376	Sap130/Sap30/Phf12	3
down	GO:0016591	RNA polymerase II, holoenzyme	0.00225983	0.0126605	0.0082827	Polr2a/Tada3/Taf3/Taf6/Rprd2/Taf7	6
down	GO:0071004	U2-type prespliceosome	0.00248352	0.0135863	0.00888838	Prpf40a/Sf3b1/Snrnp70	3
down	GO:0071010	prespliceosome	0.00248352	0.0135863	0.00888838	Prpf40a/Sf3b1/Snrnp70	3
down	GO:0000307	cyclin-dependent protein kinase holoenzyme complex	0.00256701	0.0138798	0.00908037	Rb1/Cdk2/Ccnl1/Cdk13/Brd4	5
down	GO:0005814	centriole	0.00268764	0.014365	0.00939778	Ccdc88a/Top2a/Cep43/Cep170/Cep78/Wdr90/Alms1/Pcm1	8
down	GO:0017053	transcription repressor complex	0.0029712	0.0157001	0.0102713	Tfap4/Zfpm1/Hdgf/Phf12/Spen/Ncor2	6
down	GO:0005844	polysome	0.00317256	0.0165758	0.0108441	Eif4g1/Eef2/Fxr1/Larp4b/Abcf1/Larp1	6
down	GO:1990752	microtubule end	0.00356141	0.0182476	0.0119378	Clasp2/Camsap2/Mapre1/Clip2	4
down	GO:0005876	spindle microtubule	0.0036056	0.0182476	0.0119378	Bod1l/Clasp1/Clasp2/Mapre1/Kif11/Cenpe	6
down	GO:0034719	SMN-Sm protein complex	0.00361027	0.0182476	0.0119378	Gemin5/Gemin8/Smn1	3
down	GO:0042788	polysomal ribosome	0.00396251	0.0198126	0.0129617	Eef2/Larp4b/Abcf1/Larp1	4
down	GO:0032039	integrator complex	0.00427284	0.0211369	0.0138281	Ints3/Ints1/Ints13	3
down	GO:0034451	centriolar satellite	0.00438733	0.0214748	0.0140492	Rab11fip5/Exoc7/Spag9/Ccdc66/Cep55/Cep72/Pcm1	7
down	GO:0000922	spindle pole	0.00507207	0.0245678	0.0160727	Bod1l/Rgs14/Npm1/Kif11/Ctdp1/Gpsm2/Stag1/Unc119	8
down	GO:0016528	sarcoplasm	0.00516879	0.0247782	0.0162103	Camk2g/Cherp/Hsp90b1/Itpr3/Stim1/Plec	6
down	GO:0030027	lamellipodium	0.00597644	0.0283576	0.018552	Evl/Ccdc88a/Pip5k1a/Ctnnd1/Ptk2/Vasp/Abl2/Phactr4/Abi1	9
down	GO:0036064	ciliary basal body	0.00619582	0.0291016	0.0190387	Ccdc88a/Erc1/Camsap2/Ptk2/Mapre1/Cep78/Ccdc66/Pcm1/Cyld	9
down	GO:0000803	sex chromosome	0.00642906	0.0298951	0.0195579	Dnmt3a/Cdk2/Usp7/Macroh2a1	4
down	GO:0032806	carboxy-terminal domain protein kinase complex	0.00668193	0.0307633	0.0201259	Rb1/Cdk13/Brd4	3
down	GO:0045111	intermediate filament cytoskeleton	0.00689127	0.0314161	0.0205529	Mdn1/Macf1/Tlk2/Lmnb1/Lmna/Sap30bp/Ldlrap1/Zfp131/Plec	9
down	GO:0000781	chromosome, telomeric region	0.00704523	0.0318062	0.0208081	Xrcc4/Rad51ap1/Trp53bp1/Blm/Cdk2/Atrx/Chd4	7
down	GO:0045120	pronucleus	0.00865593	0.038702	0.0253195	Blm/Tet3/Akap8	3
down	GO:0055029	nuclear DNA-directed RNA polymerase complex	0.00879957	0.0389695	0.0254945	Polr2a/Tada3/Taf3/Taf6/Rprd2/Taf7	6
down	GO:0000428	DNA-directed RNA polymerase complex	0.00924249	0.0405449	0.0265251	Polr2a/Tada3/Taf3/Taf6/Rprd2/Taf7	6
down	GO:0016514	SWI/SNF complex	0.00975747	0.042404	0.0277414	Bcl7c/Arid1a/Smarcc2	3
down	GO:0099568	cytoplasmic region	0.0103206	0.044436	0.0290708	Arfgef2/Phldb1/Mark2/Clasp1/Clasp2/Erc1/Map4/Mapk1/Lrrk2/Gpsm2	10
down	GO:0030880	RNA polymerase complex	0.0106665	0.045504	0.0297695	Polr2a/Tada3/Taf3/Taf6/Rprd2/Taf7	6
down	GO:0030687	preribosome, large subunit precursor	0.0109368	0.0458165	0.0299739	Mdn1/Noc2l/Rrp15	3
down	GO:0035371	microtubule plus-end	0.0109368	0.0458165	0.0299739	Clasp2/Mapre1/Clip2	3
down	GO:0031252	cell leading edge	0.0111741	0.0463924	0.0303507	Evl/Ccdc88a/Macf1/Clasp2/Pip5k1a/Arhgef2/Atn1/Anxa2/Ctnnd1/Ptk2/Vasp/Gas7/Abl2/Phactr4/Abi1	15
up	GO:0016607	nuclear speck	1.76268e-17	8.67241e-15	5.39938e-15	Fnbp4/Zc3h13/Oip5/Cwc22/Rbm25/Srrm1/Ythdc1/Afdn/Zc3h18/Sf3b1/Trip12/Lmna/Srsf3/Rbbp6/Rbm15/Srsf10/Alkbh5/Srsf6/Ccnl1/Thrap3/Srsf2/Hdac4/Topors/Zc3h14/Srrm2/Ncbp3/Rbm14/Bclaf1/Fyttd1/Bnip3l/Bmp2k/Rbm10/Adar/Lpxn/Cactin/Acin1/Cry2	37
up	GO:0005635	nuclear envelope	1.3094e-13	3.22113e-11	2.00546e-11	Tmem201/Mlx/Bicd2/Nup153/Cenpf/Pak1/Bnip2/Lmna/Pcyt1a/Slc16a3/Ybx1/Gch1/Igf2r/Pum2/Taf3/Pml/Nup62/Nup98/Phf8/Sh3bgrl2/Arl6ip6/Phf20/Casc3/Pom121/Nup133/Nup35/Rcc1/Bnip3l/Clip1/Rtn4/Ranbp3/Pla2g4a/Ranbp2/Pcm1/Cetn2/Vapa	36
up	GO:0031965	nuclear membrane	8.1429e-12	1.33544e-09	8.31433e-10	Tmem201/Mlx/Nup153/Pak1/Lmna/Slc16a3/Ybx1/Gch1/Pum2/Taf3/Pml/Nup62/Nup98/Phf8/Sh3bgrl2/Arl6ip6/Phf20/Casc3/Pom121/Nup133/Nup35/Rcc1/Ranbp2/Pcm1/Vapa	25
up	GO:0030139	endocytic vesicle	3.9325e-09	4.83697e-07	3.01147e-07	Plekhg5/Myo1e/Rabep1/Gsn/Vim/Rab7/Vamp3/Stx4a/Adam8/Igf2r/Rapgef1/Kif5b/Gapvd1/Flnb/Tbc1d5/Stx7/Vamp4/Sh3kbp1/Tcirg1/Myo18a	20
up	GO:0031252	cell leading edge	9.79838e-08	9.64161e-06	6.0028e-06	Acap2/Cd44/Macf1/Plekhg5/Atp2b1/Pak1/Slk/Src/Hsp90aa1/Gsn/Fgr/Vim/Sh3bp1/Actb/Stx4a/Aak1/Phactr4/Caprin1/Atp7a/Arhgef6/Amotl1/Lima1/Arhgef7/Tmod3/Myo9b/Trpv2	26
up	GO:0005925	focal adhesion	1.43704e-07	1.17837e-05	7.33646e-06	Bcar3/Sorbs1/Plec/Tns3/Pak1/Src/Gsn/Cbl/Prag1/Cyba/Peak1/Flnb/Map2k2/Lpxn/Lima1/Arhgef7	16
up	GO:0005802	trans-Golgi network	2.52741e-07	1.7764e-05	1.10598e-05	Nucb1/Vps53/Lrba/Atp11c/Arfip1/Aftph/Cpd/Stx4a/Igf2r/Lrrk2/Cln3/Tgoln1/Atp7a/Gga2/Pheta1/Dop1a/Vamp4/Flna/Myo18a	19
up	GO:0030055	cell-substrate junction	3.9671e-07	2.43977e-05	1.51898e-05	Bcar3/Sorbs1/Plec/Tns3/Pak1/Src/Gsn/Cbl/Prag1/Cyba/Peak1/Flnb/Map2k2/Lpxn/Lima1/Arhgef7	16
up	GO:0005681	spliceosomal complex	4.88089e-07	2.66822e-05	1.66122e-05	Gm7324/Cwc22/Srrm1/Sf3b1/Ncl/Hnrnpa1/Ybx1/BC005624/Srsf2/Zrsr2/Hnrnpa3/Srrm2/Rbm17/Casc3/Bud13/Adar/Cactin	17
up	GO:0030427	site of polarized growth	5.58475e-07	2.7477e-05	1.7107e-05	Fryl/Tsc2/Dicer1/Pak1/Src/Hsp90aa1/Cbl/Fgf13/Itga4/Lrrk2/Kif5b/Fkbp15/Flna/Rtn4/Ppp1r2/Arhgef7/Trpv2	17
[truncated: 115 more rows]

## Sheet: Table S4
Cluster	ID	Description	pvalue	p.adjust	qvalue	geneID	Count
[truncated: 1,694 more rows]

## Sheet: Table S5
Cluster	ID	Description	pvalue	p.adjust	qvalue	geneID	Count
[truncated: 268 more rows]

[truncated: 3 more sheets: Table S6, Table S7, Table S8]
